# Supplementary material for: Comparative Genomics of a Bovine Mycobacterium tuberculosis Isolate and Other Strains Reveals Its Potential Mechanism of Bovine Adaptation
Source: Front Microbiol. 2017 Dec 12;8:2500. doi: 10.3389/fmicb.2017.02500 (PMC5733104; doi:10.3389/fmicb.2017.02500)
Supplement: Table S4 — SNPs between M. tb 1458, H37Rv and M. bovis AF2122_97. [file Table4.XLSX]

## Sheet: Sheet1
Table S4-1. SNPs of M.tb 1458 based on H37Rv.
Gene name	Gene start	Gene End	SNP location	SNPcoord	Refbase	SNPbase	Ref codon	SNP codon	SNP Type	Annotation
Rv0003	3280	4437	734	4013	T	C	ATC->I	ACC->T	non-synonymous	recombination protein F
Rv0006	7302	9818	61	7362	G	C	GAG->E	CAG->Q	non-synonymous	DNA gyrase subunit A
Rv0006	7302	9818	284	7585	G	C	AGC->S	ACC->T	non-synonymous	DNA gyrase subunit A
Rv0006	7302	9818	2003	9304	G	A	GGC->G	GAC->D	non-synonymous	DNA gyrase subunit A
Rv0008c	12311	11874	433	11879	A	G	TCC->S	CCC->P	non-synonymous	hypothetical protein Rv0008c
Rv0012	14089	14877	697	14785	T	C	TGC->C	CGC->R	non-synonymous	hypothetical protein Rv0012
Rv0012	14089	14877	773	14861	G	T	GGC->G	GTC->V	non-synonymous	hypothetical protein Rv0012
Rv0013	14914	15612	204	15117	C	G	ATC->I	ATG->M	non-synonymous	para-aminobenzoate synthase component II
Rv0014c	17470	15590	1352	16119	C	A	CGC->R	CTC->L	non-synonymous	transmembrane serine/threonine-protein kinase B PKNB (protein kinase B) (STPK B)
Rv0015c	18762	17467	1109	17654	T	G	CAG->Q	CCG->P	non-synonymous	transmembrane serine/threonine-protein kinase A PKNA (protein kinase A) (STPK A)
Rv0015c	18762	17467	1106	17657	T	C	CAG->Q	CGG->R	non-synonymous	transmembrane serine/threonine-protein kinase A PKNA (protein kinase A) (STPK A)
Rv0018c	23181	21637	1387	21795	G	A	CCG->P	TCG->S	non-synonymous	serine/threonine phosphatase
Rv0032	34295	36610	1314	35608	C	T	GCC->A	GCT->A	synonymous	8-amino-7-oxononanoate synthase BioF2
Rv0032	34295	36610	1714	36008	G	C	GAC->D	CAC->H	non-synonymous	8-amino-7-oxononanoate synthase BioF2
Rv0034	36867	37262	165	37031	C	G	GCC->A	GCG->A	synonymous	hypothetical protein Rv0034
Rv0035	37259	38947	47	37305	C	G	TCG->S	TGG->W	non-synonymous	fatty-acid-CoA ligase
Rv0035	37259	38947	76	37334	A	T	ACT->T	TCT->S	non-synonymous	fatty-acid-CoA ligase
Rv0036c	39829	39056	672	39158	C	G	CGG->R	CGC->R	synonymous	hypothetical protein Rv0036c
Rv0039c	42351	42004	71	42281	C	A	TGC->C	TTC->F	non-synonymous	transmembrane protein
Rv0040c	43365	42433	399	42967	G	C	CCC->P	CCG->P	synonymous	secreted proline rich protein MTC28 (proline rich 28 kDa antigen)
Rv0041	43562	46471	1207	44768	A	G	AGG->R	GGG->G	non-synonymous	leucyl-tRNA synthetase
Rv0044c	49027	48233	525	48503	T	C	CGA->R	CGG->R	synonymous	oxidoreductase
Rv0045c	49939	49043	580	49360	C	T	GTC->V	ATC->I	non-synonymous	hydrolase
Rv0046c	51124	50021	568	50557	T	C	AGG->R	GGG->G	non-synonymous	myo-inositol-1-phosphate synthase INO1 (inositol 1-phosphate synthetase) (D-glucose 6-phosphate cycloaldolase) (glucose 6-phosphate cyclase) (glucocycloaldolase)
Rv0048c	52697	51828	749	51949	A	G	GTC->V	GCC->A	non-synonymous	hypothetical protein Rv0048c
Rv0050	53663	55699	732	54394	A	G	GCA->A	GCG->A	synonymous	bifunctional penicillin-binding protein 1A/1B
Rv0050	53663	55699	1891	55553	C	T	CCG->P	TCG->S	non-synonymous	bifunctional penicillin-binding protein 1A/1B
Rv0051	55696	57378	1603	57298	C	G	CGG->R	GGG->G	non-synonymous	transmembrane protein
Rv0058	60396	63020	1654	62049	A	G	AGG->R	GGG->G	non-synonymous	replicative DNA helicase
Rv0061	64991	65416	160	65150	C	T	CCA->P	TCA->S	non-synonymous	hypothetical protein Rv0061
Rv0064	68620	71559	1370	69989	G	A	GGT->G	GAT->D	non-synonymous	hypothetical protein Rv0064
Rv0064	68620	71559	1648	70267	G	T	GTC->V	TTC->F	non-synonymous	hypothetical protein Rv0064
Rv0064	68620	71559	2197	70816	A	G	AAC->N	GAC->D	non-synonymous	hypothetical protein Rv0064
Rv0064	68620	71559	2717	71336	G	C	CGC->R	CCC->P	non-synonymous	hypothetical protein Rv0064
Rv0068	75301	76212	640	75940	G	C	GTG->V	CTG->L	non-synonymous	short chain dehydrogenase
Rv0078A	87801	87208	334	87468	C	T	GAG->E	AAG->K	non-synonymous	hypothetical protein Rv0078A
Rv0082	89924	90403	221	90144	A	G	CAA->Q	CGA->R	non-synonymous	oxidoreductase
Rv0083	90400	92322	672	91071	T	C	ATT->I	ATC->I	synonymous	oxidoreductase
Rv0083	90400	92322	1800	92199	T	G	ACT->T	ACG->T	synonymous	oxidoreductase
Rv0086	93951	95417	438	94388	G	A	GGG->G	GGA->G	synonymous	hydrogenase HycQ
Rv0088	96927	97601	424	97350	A	C	AGG->R	CGG->R	synonymous	hypothetical protein Rv0088
Rv0092	100583	102868	957	101539	C	T	GGC->G	GGT->G	synonymous	cation transporter P-type ATPase A
Rv0094c	104663	103710	920	103744	A	C	CTC->L	CGC->R	non-synonymous	hypothetical protein Rv0094c
Rv0095c	105215	104805	280	104936	T	C	ACG->T	GCG->A	non-synonymous	hypothetical protein Rv0095c
Rv0095c	105215	104805	276	104940	C	A	CAG->Q	CAT->H	non-synonymous	hypothetical protein Rv0095c
Rv0095c	105215	104805	275	104941	T	C	CAG->Q	CGG->R	non-synonymous	hypothetical protein Rv0095c
Rv0095c	105215	104805	274	104942	G	C	CAG->Q	GAG->E	non-synonymous	hypothetical protein Rv0095c
Rv0095c	105215	104805	273	104943	G	C	GCC->A	GCG->A	synonymous	hypothetical protein Rv0095c
Rv0095c	105215	104805	272	104944	G	A	GCC->A	GTC->V	non-synonymous	hypothetical protein Rv0095c
Rv0095c	105215	104805	254	104962	G	A	GCG->A	GTG->V	non-synonymous	hypothetical protein Rv0095c
Rv0095c	105215	104805	209	105007	C	G	AGC->S	ACC->T	non-synonymous	hypothetical protein Rv0095c
Rv0095c	105215	104805	205	105011	G	A	CTG->L	TTG->L	synonymous	hypothetical protein Rv0095c
Rv0095c	105215	104805	195	105021	G	A	TCC->S	TCT->S	synonymous	hypothetical protein Rv0095c
Rv0095c	105215	104805	171	105045	G	C	GAC->D	GAG->E	non-synonymous	hypothetical protein Rv0095c
Rv0095c	105215	104805	77	105139	C	A	GGG->G	GTG->V	non-synonymous	hypothetical protein Rv0095c
Rv0096	105324	106715	413	105736	T	C	GTC->V	GCC->A	non-synonymous	PPE family protein
Rv0097	106734	107603	124	106857	C	T	CTA->L	TTA->L	synonymous	oxidoreductase
Rv0101	110001	117539	6000	116000	T	G	GTT->V	GTG->V	synonymous	peptide synthetase
Rv0103c	122173	119915	65	122109	A	G	TTG->L	TCG->S	non-synonymous	cation-transporter P-type ATPase B
Rv0104	122317	123831	1138	123454	C	T	CAA->Q	TAA->*	non-synonymous	hypothetical protein Rv0104
Rv0104	122317	123831	1204	123520	T	C	TAT->Y	CAT->H	non-synonymous	hypothetical protein Rv0104
Rv0109	131382	132872	1036	132417	C	G	CGC->R	GGC->G	non-synonymous	PE-PGRS family protein
Rv0111	133950	136007	1380	135329	C	T	CCC->P	CCT->P	synonymous	transmembrane acyltransferase
Rv0115	138513	139673	785	139297	G	T	GGC->G	GTC->V	non-synonymous	D-alpha-D-heptose-7-phosphate kinase
Rv0117	141200	142144	424	141623	G	A	GAT->D	AAT->N	non-synonymous	oxidative stress response regulatory protein OXYS
Rv0118c	143876	142128	670	143207	T	C	AGC->S	GGC->G	non-synonymous	putative oxalyl-CoA decarboxylase
Rv0120c	147771	145627	1685	146087	T	C	AAT->N	AGT->S	non-synonymous	elongation factor G
Rv0120c	147771	145627	1536	146236	C	G	GCG->A	GCC->A	synonymous	elongation factor G
Rv0120c	147771	145627	510	147262	G	T	GAC->D	GAA->E	non-synonymous	elongation factor G
Rv0124	149533	150996	1347	150879	C	T	GGC->G	GGT->G	synonymous	PE-PGRS family protein
Rv0124	149533	150996	1358	150890	A	G	GAC->D	GGC->G	non-synonymous	PE-PGRS family protein
Rv0127	154232	155599	52	154283	T	C	TCG->S	CCG->P	non-synonymous	hypothetical protein Rv0127
Rv0136	163366	164691	340	163705	C	T	CCT->P	TCT->S	non-synonymous	cytochrome P450 138
Rv0136	163366	164691	341	163706	C	T	CCT->P	CTT->L	non-synonymous	cytochrome P450 138
Rv0139	165827	166849	551	166377	C	G	ACC->T	AGC->S	non-synonymous	oxidoreductase
Rv0151c	179309	177543	1453	177857	G	A	CTG->L	TTG->L	synonymous	PE family protein
Rv0154c	183198	181987	375	182824	G	A	ATC->I	ATT->I	synonymous	acyl-CoA dehydrogenase FADE2
Rv0154c	183198	181987	108	183091	C	G	CCG->P	CCC->P	synonymous	acyl-CoA dehydrogenase FADE2
Rv0159c	188839	187433	40	188800	T	C	ACG->T	GCG->A	non-synonymous	PE family protein
Rv0161	190607	191956	210	190816	A	C	TCA->S	TCC->S	synonymous	oxidoreductase
Rv0165c	194938	194144	258	194681	G	C	CTC->L	CTG->L	synonymous	GntR family transcriptional regulator
Rv0166	194993	196657	690	195682	C	G	GTC->V	GTG->V	synonymous	acyl-CoA synthetase
Rv0166	194993	196657	1650	196642	C	T	AAC->N	AAT->N	synonymous	acyl-CoA synthetase
Rv0169	198534	199898	937	199470	T	G	TCC->S	GCC->A	non-synonymous	MCE-family protein MCE1A
Rv0172	202476	204068	563	203038	T	C	ATC->I	ACC->T	non-synonymous	MCE-family protein MCE1D
Rv0173	204065	205237	30	204094	G	T	GTG->V	GTT->V	synonymous	MCE-family lipoprotein LprK
Rv0174	205231	206778	1109	206339	T	C	CTG->L	CCG->P	non-synonymous	MCE-family protein MCE1F
Rv0174	205231	206778	1251	206481	C	G	CCC->P	CCG->P	synonymous	MCE-family protein MCE1F
Rv0174	205231	206778	1254	206484	G	T	GGG->G	GGT->G	synonymous	MCE-family protein MCE1F
Rv0182c	214140	213028	994	213147	C	A	GAC->D	TAC->Y	non-synonymous	RNA polymerase factor sigma-70
Rv0182c	214140	213028	860	213281	C	T	GGC->G	GAC->D	non-synonymous	RNA polymerase factor sigma-70
Rv0185	215715	216224	263	215977	C	T	GCG->A	GTG->V	non-synonymous	hypothetical protein Rv0185
Rv0186	216269	218344	933	217201	T	C	AAT->N	AAC->N	synonymous	beta-glucosidase
Rv0187	218705	219367	100	218804	A	G	AGC->S	GGC->G	non-synonymous	O-methyltransferase
Rv0191	222289	223530	637	222925	G	A	GCT->A	ACT->T	non-synonymous	integral membrane protein
Rv0192	223564	224664	379	223942	T	C	TCG->S	CCG->P	non-synonymous	hypothetical protein Rv0192
Rv0193c	226571	224724	1249	225323	T	C	AAG->K	GAG->E	non-synonymous	hypothetical protein Rv0193c
Rv0194	226878	230462	221	227098	T	C	ATG->M	ACG->T	non-synonymous	drugs-transport transmembrane ATP-binding protein ABC transporter
Rv0194	226878	230462	3293	230170	C	T	CCC->P	CTC->L	non-synonymous	drugs-transport transmembrane ATP-binding protein ABC transporter
Rv0195	230899	231534	216	231114	C	G	GCC->A	GCG->A	synonymous	two component transcriptional regulatory protein
Rv0197	232231	234519	2247	234477	T	G	TAT->Y	TAG->*	non-synonymous	oxidoreductase
Rv0199	236550	237209	412	236961	G	A	GGC->G	AGC->S	non-synonymous	hypothetical protein Rv0199
Rv0204c	243214	241976	916	242299	C	G	GTG->V	CTG->L	non-synonymous	transmembrane protein
Rv0209	249038	250123	485	249522	T	C	GTG->V	GCG->A	non-synonymous	hypothetical protein Rv0209
Rv0210	250120	251598	1456	251575	G	A	GCG->A	ACG->T	non-synonymous	hypothetical protein Rv0210
Rv0218	260924	262252	946	261869	T	C	TGT->C	CGT->R	non-synonymous	transmembrane protein
Rv0219	262254	262802	15	262268	A	T	GCA->A	GCT->A	synonymous	transmembrane protein
Rv0221	264067	265476	63	264129	G	A	ATG->M	ATA->I	non-synonymous	hypothetical protein Rv0221
Rv0222	265507	266295	48	265554	A	C	GTA->V	GTC->V	synonymous	enoyl-CoA hydratase
Rv0223c	267764	266301	14	267751	G	C	GCC->A	GGC->G	non-synonymous	aldehyde dehydrogenase
Rv0226c	271564	269834	1135	270430	G	C	CCT->P	GCT->A	non-synonymous	transmembrane protein
Rv0232	277899	278588	123	278021	T	C	CGT->R	CGC->R	synonymous	TetR/ACRR family transcriptional regulator
Rv0233	278585	279529	97	278681	C	G	CAT->H	GAT->D	non-synonymous	ribonucleotide-diphosphate reductase subunit beta
Rv0236c	286851	282649	3960	282892	C	T	ACG->T	ACA->T	synonymous	transmembrane protein
Rv0236c	286851	282649	3242	283610	G	A	GCC->A	GTC->V	non-synonymous	transmembrane protein
Rv0236c	286851	282649	3238	283614	T	C	AGC->S	GGC->G	non-synonymous	transmembrane protein
Rv0236c	286851	282649	1080	285772	A	C	CCT->P	CCG->P	synonymous	transmembrane protein
Rv0236c	286851	282649	981	285871	A	G	GTT->V	GTC->V	synonymous	transmembrane protein
Rv0237	287186	288352	1075	288260	C	T	CTG->L	TTG->L	synonymous	lipoprotein LpqI
Rv0245	296005	296493	308	296312	C	T	TCC->S	TTC->F	non-synonymous	oxidoreductase
Rv0252	302866	305427	2058	304923	A	G	AAA->K	AAG->K	synonymous	nitrite reductase large subunit
Rv0252	302866	305427	2323	305188	G	T	GTG->V	TTG->L	non-synonymous	nitrite reductase large subunit
Rv0259c	311517	310774	545	310973	G	A	GCG->A	GTG->V	non-synonymous	hypothetical protein Rv0259c
Rv0260c	312659	311514	1047	311613	G	T	GTC->V	GTA->V	synonymous	bifunctional uroporphyrinogen-III synthetase/response regulator domain protein
Rv0270	324567	326249	939	325505	T	C	GTT->V	GTC->V	synonymous	acyl-CoA synthetase
Rv0278c	336310	333437	2419	333892	G	C	CGC->R	GGC->G	non-synonymous	PE-PGRS family protein
Rv0278c	336310	333437	1587	334724	G	A	CGC->R	CGT->R	synonymous	PE-PGRS family protein
Rv0278c	336310	333437	1584	334727	G	C	GGC->G	GGG->G	synonymous	PE-PGRS family protein
Rv0278c	336310	333437	1581	334730	G	A	ACC->T	ACT->T	synonymous	PE-PGRS family protein
Rv0278c	336310	333437	1578	334733	G	C	CTC->L	CTG->L	synonymous	PE-PGRS family protein
Rv0278c	336310	333437	1576	334735	G	A	CTC->L	TTC->F	non-synonymous	PE-PGRS family protein
Rv0278c	336310	333437	1575	334736	C	T	ACG->T	ACA->T	synonymous	PE-PGRS family protein
Rv0278c	336310	333437	1560	334751	G	A	AAC->N	AAT->N	synonymous	PE-PGRS family protein
Rv0278c	336310	333437	1544	334767	A	G	GTG->V	GCG->A	non-synonymous	PE-PGRS family protein
Rv0278c	336310	333437	1542	334769	A	T	AAT->N	AAA->K	non-synonymous	PE-PGRS family protein
Rv0278c	336310	333437	1541	334770	T	G	AAT->N	ACT->T	non-synonymous	PE-PGRS family protein
Rv0278c	336310	333437	1540	334771	T	C	AAT->N	GAT->D	non-synonymous	PE-PGRS family protein
Rv0278c	336310	333437	1539	334772	T	C	CAA->Q	CAG->Q	synonymous	PE-PGRS family protein
Rv0278c	336310	333437	1527	334784	G	A	CAC->H	CAT->H	synonymous	PE-PGRS family protein
Rv0278c	336310	333437	1524	334787	C	G	CTG->L	CTC->L	synonymous	PE-PGRS family protein
Rv0278c	336310	333437	1522	334789	G	C	CTG->L	GTG->V	non-synonymous	PE-PGRS family protein
Rv0278c	336310	333437	1509	334802	C	G	GCG->A	GCC->A	synonymous	PE-PGRS family protein
Rv0278c	336310	333437	1508	334803	G	A	GCG->A	GTG->V	non-synonymous	PE-PGRS family protein
Rv0278c	336310	333437	1506	334805	G	T	CCC->P	CCA->P	synonymous	PE-PGRS family protein
Rv0278c	336310	333437	1496	334815	A	G	TTC->F	TCC->S	non-synonymous	PE-PGRS family protein
Rv0278c	336310	333437	1485	334826	A	T	GGT->G	GGA->G	synonymous	PE-PGRS family protein
Rv0278c	336310	333437	1482	334829	G	T	CTC->L	CTA->L	synonymous	PE-PGRS family protein
Rv0278c	336310	333437	1480	334831	G	T	CTC->L	ATC->I	non-synonymous	PE-PGRS family protein
Rv0278c	336310	333437	1479	334832	C	T	CTG->L	CTA->L	synonymous	PE-PGRS family protein
Rv0278c	336310	333437	1475	334836	A	T	CTG->L	CAG->Q	non-synonymous	PE-PGRS family protein
Rv0278c	336310	333437	1468	334843	T	C	AGC->S	GGC->G	non-synonymous	PE-PGRS family protein
Rv0278c	336310	333437	1465	334846	C	G	GTC->V	CTC->L	non-synonymous	PE-PGRS family protein
Rv0278c	336310	333437	1458	334853	C	G	GTG->V	GTC->V	synonymous	PE-PGRS family protein
Rv0278c	336310	333437	1456	334855	C	G	GTG->V	CTG->L	non-synonymous	PE-PGRS family protein
Rv0278c	336310	333437	1455	334856	T	G	GGA->G	GGC->G	synonymous	PE-PGRS family protein
Rv0278c	336310	333437	1391	334920	G	T	ACC->T	AAC->N	non-synonymous	PE-PGRS family protein
Rv0278c	336310	333437	1382	334929	A	G	ATC->I	ACC->T	non-synonymous	PE-PGRS family protein
Rv0278c	336310	333437	1381	334930	T	C	ATC->I	GTC->V	non-synonymous	PE-PGRS family protein
Rv0278c	336310	333437	1372	334939	T	C	AAC->N	GAC->D	non-synonymous	PE-PGRS family protein
Rv0278c	336310	333437	1371	334940	G	C	GGC->G	GGG->G	synonymous	PE-PGRS family protein
Rv0278c	336310	333437	1362	334949	C	G	GTG->V	GTC->V	synonymous	PE-PGRS family protein
Rv0278c	336310	333437	1361	334950	A	G	GTG->V	GCG->A	non-synonymous	PE-PGRS family protein
Rv0278c	336310	333437	1360	334951	C	T	GTG->V	ATG->M	non-synonymous	PE-PGRS family protein
Rv0278c	336310	333437	1359	334952	C	A	GCG->A	GCT->A	synonymous	PE-PGRS family protein
Rv0278c	336310	333437	1354	334957	T	C	AGC->S	GGC->G	non-synonymous	PE-PGRS family protein
Rv0278c	336310	333437	1352	334959	G	C	GCC->A	GGC->G	non-synonymous	PE-PGRS family protein
Rv0278c	336310	333437	1350	334961	G	C	GGC->G	GGG->G	synonymous	PE-PGRS family protein
Rv0278c	336310	333437	1344	334967	G	A	AAC->N	AAT->N	synonymous	PE-PGRS family protein
Rv0278c	336310	333437	1343	334968	T	C	AAC->N	AGC->S	non-synonymous	PE-PGRS family protein
Rv0278c	336310	333437	1341	334970	A	G	GGT->G	GGC->G	synonymous	PE-PGRS family protein
Rv0278c	336310	333437	1334	334977	T	G	AAC->N	ACC->T	non-synonymous	PE-PGRS family protein
Rv0278c	336310	333437	1325	334986	T	G	AAC->N	ACC->T	non-synonymous	PE-PGRS family protein
Rv0278c	336310	333437	1324	334987	T	C	AAC->N	GAC->D	non-synonymous	PE-PGRS family protein
Rv0278c	336310	333437	1323	334988	A	G	GGT->G	GGC->G	synonymous	PE-PGRS family protein
Rv0278c	336310	333437	1318	334993	T	A	ATC->I	TTC->F	non-synonymous	PE-PGRS family protein
Rv0278c	336310	333437	952	335359	C	T	GGC->G	AGC->S	non-synonymous	PE-PGRS family protein
Rv0278c	336310	333437	946	335365	G	T	CTG->L	ATG->M	non-synonymous	PE-PGRS family protein
Rv0278c	336310	333437	930	335381	G	C	GCC->A	GCG->A	synonymous	PE-PGRS family protein
Rv0278c	336310	333437	927	335384	C	A	GGG->G	GGT->G	synonymous	PE-PGRS family protein
Rv0278c	336310	333437	920	335391	A	G	GTC->V	GCC->A	non-synonymous	PE-PGRS family protein
Rv0278c	336310	333437	918	335393	T	C	GGA->G	GGG->G	synonymous	PE-PGRS family protein
Rv0278c	336310	333437	911	335400	A	G	TTC->F	TCC->S	non-synonymous	PE-PGRS family protein
Rv0278c	336310	333437	908	335403	C	G	AGC->S	ACC->T	non-synonymous	PE-PGRS family protein
Rv0278c	336310	333437	907	335404	T	C	AGC->S	GGC->G	non-synonymous	PE-PGRS family protein
Rv0278c	336310	333437	905	335406	C	G	AGC->S	ACC->T	non-synonymous	PE-PGRS family protein
Rv0278c	336310	333437	902	335409	T	G	GAC->D	GCC->A	non-synonymous	PE-PGRS family protein
Rv0278c	336310	333437	901	335410	C	T	GAC->D	AAC->N	non-synonymous	PE-PGRS family protein
Rv0278c	336310	333437	897	335414	G	C	TTC->F	TTG->L	non-synonymous	PE-PGRS family protein
Rv0278c	336310	333437	727	335584	T	C	ACG->T	GCG->A	non-synonymous	PE-PGRS family protein
Rv0278c	336310	333437	723	335588	T	C	GGA->G	GGG->G	synonymous	PE-PGRS family protein
Rv0278c	336310	333437	714	335597	C	G	GGG->G	GGC->G	synonymous	PE-PGRS family protein
Rv0278c	336310	333437	705	335606	T	C	GGA->G	GGG->G	synonymous	PE-PGRS family protein
Rv0278c	336310	333437	669	335642	A	G	GCT->A	GCC->A	synonymous	PE-PGRS family protein
Rv0278c	336310	333437	668	335643	G	T	GCT->A	GAT->D	non-synonymous	PE-PGRS family protein
Rv0278c	336310	333437	660	335651	G	C	GCC->A	GCG->A	synonymous	PE-PGRS family protein
Rv0278c	336310	333437	657	335654	G	A	GGC->G	GGT->G	synonymous	PE-PGRS family protein
Rv0278c	336310	333437	654	335657	G	A	GGC->G	GGT->G	synonymous	PE-PGRS family protein
Rv0278c	336310	333437	642	335669	C	G	ACG->T	ACC->T	synonymous	PE-PGRS family protein
Rv0278c	336310	333437	638	335673	A	G	CTC->L	CCC->P	non-synonymous	PE-PGRS family protein
Rv0278c	336310	333437	637	335674	G	T	CTC->L	ATC->I	non-synonymous	PE-PGRS family protein
Rv0278c	336310	333437	635	335676	G	T	GCC->A	GAC->D	non-synonymous	PE-PGRS family protein
Rv0278c	336310	333437	634	335677	C	T	GCC->A	ACC->T	non-synonymous	PE-PGRS family protein
Rv0278c	336310	333437	633	335678	T	C	GTA->V	GTG->V	synonymous	PE-PGRS family protein
Rv0278c	336310	333437	632	335679	A	G	GTA->V	GCA->A	non-synonymous	PE-PGRS family protein
Rv0278c	336310	333437	631	335680	C	T	GTA->V	ATA->I	non-synonymous	PE-PGRS family protein
Rv0278c	336310	333437	629	335682	A	G	GTA->V	GCA->A	non-synonymous	PE-PGRS family protein
Rv0278c	336310	333437	610	335701	C	A	GGC->G	TGC->C	non-synonymous	PE-PGRS family protein
Rv0278c	336310	333437	606	335705	G	T	GGC->G	GGA->G	synonymous	PE-PGRS family protein
Rv0278c	336310	333437	589	335722	G	A	CTG->L	TTG->L	synonymous	PE-PGRS family protein
Rv0278c	336310	333437	586	335725	T	C	ATG->M	GTG->V	non-synonymous	PE-PGRS family protein
Rv0278c	336310	333437	579	335732	G	C	GGC->G	GGG->G	synonymous	PE-PGRS family protein
Rv0278c	336310	333437	571	335740	C	T	GCC->A	ACC->T	non-synonymous	PE-PGRS family protein
Rv0278c	336310	333437	570	335741	T	A	GGA->G	GGT->G	synonymous	PE-PGRS family protein
Rv0278c	336310	333437	562	335749	A	C	TCC->S	GCC->A	non-synonymous	PE-PGRS family protein
Rv0279c	339073	336560	426	338648	T	G	GGA->G	GGC->G	synonymous	PE-PGRS family protein
Rv0279c	339073	336560	405	338669	T	C	TTA->L	TTG->L	synonymous	PE-PGRS family protein
Rv0279c	339073	336560	392	338682	T	G	GAC->D	GCC->A	non-synonymous	PE-PGRS family protein
Rv0279c	339073	336560	391	338683	C	G	GAC->D	CAC->H	non-synonymous	PE-PGRS family protein
Rv0279c	339073	336560	389	338685	C	G	GGG->G	GCG->A	non-synonymous	PE-PGRS family protein
Rv0279c	339073	336560	384	338690	A	G	AAT->N	AAC->N	synonymous	PE-PGRS family protein
Rv0279c	339073	336560	382	338692	T	C	AAT->N	GAT->D	non-synonymous	PE-PGRS family protein
Rv0279c	339073	336560	355	338719	T	C	ACC->T	GCC->A	non-synonymous	PE-PGRS family protein
Rv0279c	339073	336560	306	338768	G	A	ATC->I	ATT->I	synonymous	PE-PGRS family protein
Rv0279c	339073	336560	300	338774	G	A	GCC->A	GCT->A	synonymous	PE-PGRS family protein
Rv0279c	339073	336560	299	338775	G	T	GCC->A	GAC->D	non-synonymous	PE-PGRS family protein
Rv0279c	339073	336560	297	338777	G	C	CTC->L	CTG->L	synonymous	PE-PGRS family protein
Rv0279c	339073	336560	285	338789	G	C	ACC->T	ACG->T	synonymous	PE-PGRS family protein
Rv0279c	339073	336560	284	338790	G	A	ACC->T	ATC->I	non-synonymous	PE-PGRS family protein
Rv0279c	339073	336560	283	338791	T	C	ACC->T	GCC->A	non-synonymous	PE-PGRS family protein
Rv0279c	339073	336560	282	338792	G	C	GCC->A	GCG->A	synonymous	PE-PGRS family protein
Rv0279c	339073	336560	264	338810	G	C	GCC->A	GCG->A	synonymous	PE-PGRS family protein
Rv0279c	339073	336560	230	338844	A	G	GTG->V	GCG->A	non-synonymous	PE-PGRS family protein
Rv0279c	339073	336560	229	338845	C	T	GTG->V	ATG->M	non-synonymous	PE-PGRS family protein
Rv0279c	339073	336560	198	338876	G	A	AGC->S	AGT->S	synonymous	PE-PGRS family protein
Rv0279c	339073	336560	171	338903	G	C	GCC->A	GCG->A	synonymous	PE-PGRS family protein
Rv0279c	339073	336560	114	338960	T	C	GCA->A	GCG->A	synonymous	PE-PGRS family protein
Rv0279c	339073	336560	111	338963	T	C	ACA->T	ACG->T	synonymous	PE-PGRS family protein
Rv0280	339364	340974	769	340132	G	A	GAA->E	AAA->K	non-synonymous	PPE family protein
Rv0280	339364	340974	1009	340372	T	C	TCG->S	CCG->P	non-synonymous	PPE family protein
Rv0282	342130	344025	17	342146	A	C	GAA->E	GCA->A	non-synonymous	hypothetical protein Rv0282
Rv0284	345635	349627	641	346275	C	G	CCG->P	CGG->R	non-synonymous	hypothetical protein Rv0284
Rv0290	353083	354501	227	353309	G	A	AGC->S	AAC->N	non-synonymous	transmembrane protein
Rv0290	353083	354501	283	353365	G	A	GCC->A	ACC->T	non-synonymous	transmembrane protein
Rv0292	355880	356875	649	356528	A	G	AAT->N	GAT->D	non-synonymous	transmembrane protein
Rv0298	363252	363479	213	363464	G	A	CGG->R	CGA->R	synonymous	hypothetical protein Rv0298
Rv0302	364605	365237	250	364854	C	G	CAT->H	GAT->D	non-synonymous	TetR/ACRR family transcriptional regulator
Rv0305c	375711	372820	2799	372913	A	C	GGT->G	GGG->G	synonymous	PPE family protein
Rv0305c	375711	372820	1359	374353	A	G	CGT->R	CGC->R	synonymous	PPE family protein
Rv0307c	377055	376573	282	376774	T	C	GCA->A	GCG->A	synonymous	hypothetical protein Rv0307c
Rv0307c	377055	376573	42	377014	C	T	CTG->L	CTA->L	synonymous	hypothetical protein Rv0307c
Rv0311	379172	380401	357	379528	G	T	GAG->E	GAT->D	non-synonymous	hypothetical protein Rv0311
Rv0315	383602	384486	115	383716	C	T	CCG->P	TCG->S	non-synonymous	beta-1,3-glucanase precursor
Rv0315	383602	384486	779	384380	A	C	AAG->K	ACG->T	non-synonymous	beta-1,3-glucanase precursor
Rv0318c	387099	386305	668	386432	C	G	GGG->G	GCG->A	non-synonymous	integral membrane protein
Rv0319	387148	387816	446	387593	T	G	CTC->L	CGC->R	non-synonymous	pyrrolidone-carboxylate peptidase
Rv0323c	391251	390580	424	390828	T	C	AGT->S	GGT->G	non-synonymous	hypothetical protein Rv0323c
Rv0324	391352	392032	502	391853	A	G	ACT->T	GCT->A	non-synonymous	ArsR family transcriptional regulator
Rv0325	392039	392263	223	392261	T	C	TAG->*	CAG->Q	non-synonymous	hypothetical protein Rv0325
Rv0336	400192	401703	402	400593	T	G	CCT->P	CCG->P	synonymous	13E12 repeat family protein
Rv0336	400192	401703	1127	401318	A	G	TAC->Y	TGC->C	non-synonymous	13E12 repeat family protein
Rv0338c	405841	403193	1862	403980	G	A	GCC->A	GTC->V	non-synonymous	iron-sulfur-binding reductase
Rv0338c	405841	403193	1516	404326	T	C	AGG->R	GGG->G	non-synonymous	iron-sulfur-binding reductase
Rv0344c	414941	414381	456	414486	C	T	GAG->E	GAA->E	synonymous	lipoprotein LpqJ
Rv0350	419835	421712	174	420008	A	G	GCA->A	GCG->A	synonymous	molecular chaperone DnaK
Rv0355c	434679	424777	9699	424981	G	A	CCC->P	CCT->P	synonymous	PPE family protein
Rv0355c	434679	424777	8809	425871	C	G	GGC->G	CGC->R	non-synonymous	PPE family protein
Rv0355c	434679	424777	7771	426909	A	C	TGG->W	GGG->G	non-synonymous	PPE family protein
Rv0355c	434679	424777	5982	428698	C	T	GCG->A	GCA->A	synonymous	PPE family protein
Rv0355c	434679	424777	2144	432536	C	T	GGT->G	GAT->D	non-synonymous	PPE family protein
Rv0363c	442299	441265	477	441823	C	T	GAG->E	GAA->E	synonymous	fructose-bisphosphate aldolase
Rv0368c	446525	445314	746	445780	C	T	CGT->R	CAT->H	non-synonymous	hypothetical protein Rv0368c
Rv0369c	447046	446531	385	446662	G	T	CCT->P	ACT->T	non-synonymous	membrane oxidoreductase
Rv0376c	454372	453230	78	454295	T	C	CCA->P	CCG->P	synonymous	hypothetical protein Rv0376c
Rv0376c	454372	453230	40	454333	T	G	ACG->T	CCG->P	non-synonymous	hypothetical protein Rv0376c
Rv0380c	456819	456268	226	456594	T	C	ATG->M	GTG->V	non-synonymous	RNA methyltransferase
Rv0381c	457823	456915	372	457452	T	G	ACA->T	ACC->T	synonymous	hypothetical protein Rv0381c
Rv0382c	458380	457841	99	458282	A	G	TAT->Y	TAC->Y	synonymous	orotate phosphoribosyltransferase
Rv0383c	459315	458461	21	459295	C	G	ACG->T	ACC->T	synonymous	hypothetical protein Rv0383c
Rv0384c	462002	459456	1590	460413	C	T	AAG->K	AAA->K	synonymous	endopeptidase ATP binding protein
Rv0386	463411	466668	1890	465300	C	T	TTC->F	TTT->F	synonymous	LuxR/UHPA family transcriptional regulator
Rv0388c	468001	467459	486	467516	G	C	TCC->S	TCG->S	synonymous	PPE family protein
Rv0388c	468001	467459	476	467526	C	G	GGG->G	GCG->A	non-synonymous	PPE family protein
Rv0388c	468001	467459	456	467546	G	C	GAC->D	GAG->E	non-synonymous	PPE family protein
Rv0388c	468001	467459	445	467557	A	C	TTG->L	GTG->V	non-synonymous	PPE family protein
Rv0388c	468001	467459	438	467564	A	C	CAT->H	CAG->Q	non-synonymous	PPE family protein
Rv0388c	468001	467459	417	467585	G	C	CAC->H	CAG->Q	non-synonymous	PPE family protein
Rv0388c	468001	467459	412	467590	T	C	ACG->T	GCG->A	non-synonymous	PPE family protein
Rv0388c	468001	467459	381	467621	T	G	GGA->G	GGC->G	synonymous	PPE family protein
Rv0388c	468001	467459	364	467638	G	T	CAG->Q	AAG->K	non-synonymous	PPE family protein
Rv0395	474940	475344	239	475178	T	C	GTC->V	GCC->A	non-synonymous	hypothetical protein Rv0395
Rv0398c	477320	476679	87	477234	T	G	GAA->E	GAC->D	non-synonymous	hypothetical protein Rv0398c
Rv0404	483977	485734	620	484596	C	T	CCG->P	CTG->L	non-synonymous	acyl-CoA synthetase
Rv0405	485731	489939	4205	489935	G	C	CGG->R	CCG->P	non-synonymous	membrane bound polyketide synthase
Rv0406c	490705	489887	771	489935	G	C	ACC->T	ACG->T	synonymous	beta lactamase like protein
Rv0407	490783	491793	960	491742	T	C	TTT->F	TTC->F	synonymous	F420-dependent glucose-6-phosphate dehydrogenase
Rv0408	491786	493858	365	492150	G	C	GGC->G	GCC->A	non-synonymous	phosphate acetyltransferase
Rv0411c	498300	497314	810	497491	G	A	GAC->D	GAT->D	synonymous	glutamine-binding lipoprotein
Rv0412c	499619	498300	1089	498531	A	G	GCT->A	GCC->A	synonymous	hypothetical protein Rv0412c
Rv0412c	499619	498300	1063	498557	C	A	GAC->D	TAC->Y	non-synonymous	hypothetical protein Rv0412c
Rv0417	502366	503124	224	502589	C	G	TCC->S	TGC->C	non-synonymous	thiazole synthase
Rv0419	505086	506582	889	505974	G	A	GCG->A	ACG->T	non-synonymous	lipoprotein peptidase LpqM
Rv0425c	515321	510702	3804	511518	T	G	ATA->I	ATC->I	synonymous	metal cation transporting P-type ATPase CtpH
Rv0425c	515321	510702	2065	513257	T	C	ATG->M	GTG->V	non-synonymous	metal cation transporting P-type ATPase CtpH
Rv0426c	515816	515373	290	515527	G	A	CCC->P	CTC->L	non-synonymous	hypothetical protein Rv0426c
Rv0428c	517803	516895	446	517358	T	C	GAC->D	GGC->G	non-synonymous	hypothetical protein Rv0428c
Rv0430	518733	519041	255	518987	C	T	CGC->R	CGT->R	synonymous	hypothetical protein Rv0430
Rv0436c	525390	524530	500	524891	C	A	GGC->G	GTC->V	non-synonymous	CDP-diacylglycerol--serine O-phosphatidyltransferase
Rv0442c	532214	530751	118	532097	T	C	AAA->K	GAA->E	non-synonymous	PPE family protein
Rv0444c	533789	533091	243	533547	C	G	GAG->E	GAC->D	non-synonymous	hypothetical protein Rv0444c
Rv0450c	541491	538588	291	541201	A	G	CTT->L	CTC->L	synonymous	transmembrane transport protein MmpL4
Rv0452	542142	542852	373	542514	C	G	CAT->H	GAT->D	non-synonymous	transcriptional regulatory protein
Rv0456c	546803	545889	447	546357	A	G	ACT->T	ACC->T	synonymous	enoyl-CoA hydratase
Rv0457c	549607	547586	245	549363	C	G	CGC->R	CCC->P	non-synonymous	peptidase
Rv0459	551198	551689	328	551525	A	C	AGA->R	CGA->R	synonymous	hypothetical protein Rv0459
Rv0461	552026	552550	60	552085	A	G	CAA->Q	CAG->Q	synonymous	hypothetical protein Rv0461
Rv0465c	556306	554882	316	555991	A	G	TGC->C	CGC->R	non-synonymous	transcriptional regulatory protein
Rv0473	563564	564934	14	563577	A	G	AAA->K	AGA->R	non-synonymous	transmembrane protein
Rv0473	563564	564934	1358	564921	A	G	CAA->Q	CGA->R	non-synonymous	transmembrane protein
Rv0483	571710	573065	882	572591	C	T	GAC->D	GAT->D	synonymous	lipoprotein LprQ
Rv0484c	573801	573046	540	573262	A	G	GGT->G	GGC->G	synonymous	short-chain type oxidoreductase
Rv0486	575348	576790	560	575907	C	T	GCA->A	GTA->V	non-synonymous	mannosyltransferase
Rv0492c	583378	581489	208	583171	A	C	TCG->S	GCG->A	non-synonymous	oxidoreductase GMC-type
Rv0493c	584690	583701	520	584171	T	C	AGT->S	GGT->G	non-synonymous	hypothetical protein Rv0493c
Rv0497	587377	588309	9	587385	A	G	GGA->G	GGG->G	synonymous	transmembrane protein
Rv0500	590083	590970	354	590436	T	C	GCT->A	GCC->A	synonymous	pyrroline-5-carboxylate reductase
Rv0507	597199	600105	618	597816	A	G	GCA->A	GCG->A	synonymous	transmembrane transport protein MmpL2
Rv0507	597199	600105	1277	598475	G	A	CGC->R	CAC->H	non-synonymous	transmembrane transport protein MmpL2
Rv0507	597199	600105	2670	599868	A	G	CGA->R	CGG->R	synonymous	transmembrane transport protein MmpL2
Rv0512	604602	605591	549	605150	G	A	CGG->R	CGA->R	synonymous	delta-aminolevulinic acid dehydratase
Rv0522	613038	614342	1158	614195	G	A	GTG->V	GTA->V	synonymous	GABA permease GabP
Rv0529	619891	620865	735	620625	A	G	ATA->I	ATG->M	non-synonymous	cytochrome C-type biogenesis protein CcsA
Rv0530	620907	622124	692	621598	C	T	CCC->P	CTC->L	non-synonymous	hypothetical protein Rv0530
Rv0532	622793	624577	680	623472	A	G	GAC->D	GGC->G	non-synonymous	PE-PGRS family protein
Rv0532	622793	624577	716	623508	C	G	GCC->A	GGC->G	non-synonymous	PE-PGRS family protein
Rv0536	627248	628288	238	627485	G	A	GTC->V	ATC->I	non-synonymous	UDP-glucose 4-epimerase
Rv0537c	629731	628298	868	628864	T	C	ACC->T	GCC->A	non-synonymous	integral membrane protein
Rv0538	630040	631686	683	630722	G	C	CGG->R	CCG->P	non-synonymous	hypothetical protein Rv0538
Rv0545c	637463	636210	145	637319	G	A	CCT->P	TCT->S	non-synonymous	inorganic phosphate transporter
Rv0556	647959	648474	44	648002	T	G	CTC->L	CGC->R	non-synonymous	transmembrane protein
Rv0557	648536	649672	321	648856	T	C	GGT->G	GGC->G	synonymous	mannosyltransferase PIMB
Rv0565c	657470	656010	390	657081	C	T	GTG->V	GTA->V	synonymous	monooxygenase
Rv0565c	657470	656010	329	657142	C	T	CGC->R	CAC->H	non-synonymous	monooxygenase
Rv0570	661295	663373	1617	662911	T	C	GCT->A	GCC->A	synonymous	ribonucleoside-diphosphate reductase large subunit NrdZ
Rv0572c	665383	665042	91	665293	A	G	TTC->F	CTC->L	non-synonymous	hypothetical protein Rv0572c
Rv0575c	669745	668579	713	669033	T	A	GAC->D	GTC->V	non-synonymous	hypothetical protein Rv0575c
Rv0575c	669745	668579	348	669398	T	C	CAA->Q	CAG->Q	synonymous	hypothetical protein Rv0575c
Rv0576	669848	671152	698	670545	G	A	CGC->R	CAC->H	non-synonymous	ArsR family transcriptional regulator
Rv0577	671166	671951	220	671385	C	G	CCG->P	GCG->A	non-synonymous	hypothetical protein Rv0577
Rv0578c	675916	671996	3426	672491	C	G	GGG->G	GGC->G	synonymous	PE-PGRS family protein
Rv0578c	675916	671996	3196	672721	T	C	AAC->N	GAC->D	non-synonymous	PE-PGRS family protein
Rv0578c	675916	671996	2679	673238	A	G	CAT->H	CAC->H	synonymous	PE-PGRS family protein
Rv0578c	675916	671996	2353	673564	C	T	GCC->A	ACC->T	non-synonymous	PE-PGRS family protein
Rv0585c	684272	681885	444	683829	C	T	GCG->A	GCA->A	synonymous	integral membrane protein
Rv0587	685129	685926	106	685234	C	T	CTG->L	TTG->L	synonymous	integral membrane protein YrbE2a
Rv0587	685129	685926	333	685461	C	G	GCC->A	GCG->A	synonymous	integral membrane protein YrbE2a
Rv0587	685129	685926	480	685608	T	C	CTT->L	CTC->L	synonymous	integral membrane protein YrbE2a
Rv0588	685928	686815	337	686264	G	A	GCG->A	ACG->T	non-synonymous	integral membrane protein YrbE2b
Rv0589	686821	688035	152	686972	T	C	TTC->F	TCC->S	non-synonymous	MCE-family protein MCE2A
Rv0591	689059	690504	1392	690450	A	C	GCA->A	GCC->A	synonymous	MCE-family protein MCE2C
Rv0591	689059	690504	1407	690465	T	G	CTT->L	CTG->L	synonymous	MCE-family protein MCE2C
Rv0594	693237	694787	1295	694531	A	G	AAC->N	AGC->S	non-synonymous	MCE-family protein MCE2F
Rv0601c	698994	698524	27	698968	G	A	GGC->G	GGT->G	synonymous	two component sensor kinase
Rv0608	703244	703489	123	703366	C	T	CGC->R	CGT->R	synonymous	hypothetical protein Rv0608
Rv0610c	705909	704752	704	705206	T	G	GAA->E	GCA->A	non-synonymous	hypothetical protein Rv0610c
Rv0613c	709515	706948	2182	707334	T	C	ACC->T	GCC->A	non-synonymous	hypothetical protein Rv0613c
Rv0619	712174	712719	520	712693	A	G	ACC->T	GCC->A	non-synonymous	galactose-1-phosphate uridylyltransferase GalTb
Rv0620	712716	713807	595	713310	T	C	TGT->C	CGT->R	non-synonymous	galactokinase
Rv0629c	721732	720005	360	721373	T	G	GAA->E	GAC->D	non-synonymous	exonuclease V alpha chain
Rv0631c	728306	725013	3117	725190	G	A	TTC->F	TTT->F	synonymous	exonuclease V gamma chain
Rv0634c	731033	730320	19	731015	A	G	TAC->Y	CAC->H	non-synonymous	glyoxalase II
Rv0644c	739160	738297	639	738522	T	G	GAA->E	GAC->D	non-synonymous	methoxy mycolic acid synthase
Rv0658c	754409	753693	224	754186	A	G	CTC->L	CCC->P	non-synonymous	integral membrane protein
Rv0663	756137	758500	1003	757139	C	A	CGC->R	AGC->S	non-synonymous	arylsulfatase AtsD
Rv0663	756137	758500	1046	757182	A	G	GAC->D	GGC->G	non-synonymous	arylsulfatase AtsD
Rv0667	759807	763325	1303	761109	G	T	GAC->D	TAC->Y	non-synonymous	DNA-directed RNA polymerase subunit beta
Rv0667	759807	763325	1348	761154	T	G	TCG->S	GCG->A	non-synonymous	DNA-directed RNA polymerase subunit beta
Rv0667	759807	763325	3225	763031	T	C	GCT->A	GCC->A	synonymous	DNA-directed RNA polymerase subunit beta
Rv0668	763370	767320	146	763515	A	G	GAG->E	GGG->G	non-synonymous	DNA-directed RNA polymerase subunit beta'
Rv0673	773123	774061	375	773497	C	A	TTC->F	TTA->L	non-synonymous	enoyl-CoA hydratase
Rv0676c	778480	775586	2842	775639	T	C	ATT->I	GTT->V	non-synonymous	transmembrane transport protein MmpL5
Rv0676c	778480	775586	2381	776100	G	A	ACC->T	ATC->I	non-synonymous	transmembrane transport protein MmpL5
Rv0676c	778480	775586	2299	776182	C	T	GAC->D	AAC->N	non-synonymous	transmembrane transport protein MmpL5
Rv0679c	780040	779543	426	779615	G	C	AAC->N	AAG->K	non-synonymous	putative threonine rich protein
Rv0682	781560	781934	363	781922	A	G	AAA->K	AAG->K	synonymous	30S ribosomal protein S12
Rv0691c	791666	791070	418	791249	C	T	GCC->A	ACC->T	non-synonymous	transcriptional regulatory protein
Rv0697	796933	798372	804	797736	C	T	CTC->L	CTT->L	synonymous	dehydrogenase
Rv0697	796933	798372	1423	798355	G	C	GCC->A	CCC->P	non-synonymous	dehydrogenase
Rv0699	799629	799850	38	799666	A	G	GAC->D	GGC->G	non-synonymous	hypothetical protein Rv0699
Rv0715	811742	812059	12	811753	C	T	CAC->H	CAT->H	synonymous	50S ribosomal protein L24
Rv0727c	820499	819843	17	820483	G	T	GCC->A	GAC->D	non-synonymous	L-fuculose-phosphate aldolase
Rv0728c	821476	820496	725	820752	C	T	CGC->R	CAC->H	non-synonymous	D-3-phosphoglycerate dehydrogenase
Rv0745	835154	835681	458	835611	C	T	ACG->T	ATG->M	non-synonymous	hypothetical protein Rv0745
Rv0746	835701	838052	1333	837033	A	G	ACC->T	GCC->A	non-synonymous	PE-PGRS family protein
Rv0747	838451	840856	540	838990	C	G	GCC->A	GCG->A	synonymous	PE-PGRS family protein
Rv0747	838451	840856	673	839123	A	G	AGG->R	GGG->G	non-synonymous	PE-PGRS family protein
Rv0747	838451	840856	679	839129	C	G	CGC->R	GGC->G	non-synonymous	PE-PGRS family protein
Rv0747	838451	840856	744	839194	A	G	ACA->T	ACG->T	synonymous	PE-PGRS family protein
Rv0747	838451	840856	884	839334	A	G	AAA->K	AGA->R	non-synonymous	PE-PGRS family protein
Rv0747	838451	840856	898	839348	A	G	AGC->S	GGC->G	non-synonymous	PE-PGRS family protein
Rv0747	838451	840856	2046	840496	C	G	GGC->G	GGG->G	synonymous	PE-PGRS family protein
Rv0747	838451	840856	2344	840794	A	G	AGC->S	GGC->G	non-synonymous	PE-PGRS family protein
Rv0747	838451	840856	2345	840795	G	C	AGC->S	ACC->T	non-synonymous	PE-PGRS family protein
Rv0749A	841874	841737	111	841764	G	C	ACC->T	ACG->T	synonymous	hypothetical protein Rv0749A
Rv0758	852396	853853	515	852910	C	T	CCC->P	CTC->L	non-synonymous	two component system response sensor kinase membrane associated PHOR
Rv0764c	858037	856682	342	857696	A	G	GCT->A	GCC->A	synonymous	cytochrome P450 sterol 14-alpha demethylase
Rv0768	860912	862381	305	861216	T	G	CTC->L	CGC->R	non-synonymous	aldehyde dehydrogenase NAD dependent AldA
Rv0773c	867389	865851	1339	866051	G	A	CGC->R	TGC->C	non-synonymous	bifunctional cephalosporin acylase/gamma-glutamyltranspeptidase
Rv0782	874732	876390	1410	876141	G	T	ACG->T	ACT->T	synonymous	oligopeptidase B
Rv0785	879340	881040	1223	880562	G	T	TGC->C	TTC->F	non-synonymous	putative FAD-binding dehydrogenase
Rv0787	881459	882418	799	882257	T	C	TAC->Y	CAC->H	non-synonymous	hypothetical protein Rv0787
Rv0797	890388	891482	162	890549	G	A	TGG->W	TGA->*	non-synonymous	IS1547 transposase
Rv0797	890388	891482	331	890718	A	C	ATG->M	CTG->L	non-synonymous	IS1547 transposase
Rv0797	890388	891482	624	891011	A	G	CTA->L	CTG->L	synonymous	IS1547 transposase
Rv0799c	893273	892266	858	892416	C	T	GTG->V	GTA->V	synonymous	hypothetical protein Rv0799c
Rv0800	893318	894619	416	893733	T	G	CTG->L	CGG->R	non-synonymous	putative aminopeptidase 2
Rv0806c	901330	899732	1110	900221	T	C	GTA->V	GTG->V	synonymous	UDP-glucose-4-epimerase CpsY
Rv0808	902111	903694	302	902412	T	C	GTC->V	GCC->A	non-synonymous	amidophosphoribosyltransferase
Rv0808	902111	903694	1427	903537	G	T	CGG->R	CTG->L	non-synonymous	amidophosphoribosyltransferase
Rv0808	902111	903694	1440	903550	T	C	GCT->A	GCC->A	synonymous	amidophosphoribosyltransferase
Rv0809	903725	904819	189	903913	T	C	GGT->G	GGC->G	synonymous	phosphoribosylaminoimidazole synthetase
Rv0812	906423	907292	435	906857	A	G	ATA->I	ATG->M	non-synonymous	4-amino-4-deoxychorismate lyase
Rv0814c	908483	908181	298	908186	T	C	ACC->T	GCC->A	non-synonymous	hypothetical protein Rv0814c
Rv0815c	909318	908485	153	909166	C	T	CTG->L	CTA->L	synonymous	thiosulfate sulfurtransferase CysA2
Rv0823c	917646	916477	960	916687	G	A	CTC->L	CTT->L	synonymous	transcriptional regulatory protein
Rv0825c	919553	918912	203	919351	A	C	TTC->F	TGC->C	non-synonymous	hypothetical protein Rv0825c
Rv0829	921575	921865	239	921813	C	G	GCA->A	GGA->G	non-synonymous	hypothetical protein Rv0829
Rv0833	925361	927610	93	925453	C	T	GCC->A	GCT->A	synonymous	PE-PGRS family protein
Rv0833	925361	927610	1750	927110	A	G	AGT->S	GGT->G	non-synonymous	PE-PGRS family protein
Rv0833	925361	927610	2025	927385	A	G	GGA->G	GGG->G	synonymous	PE-PGRS family protein
Rv0835	930953	931597	171	931123	T	C	TAT->Y	TAC->Y	synonymous	lipoprotein LpqQ
Rv0836c	932932	932279	653	932280	T	C	TAG->*	TGG->W	non-synonymous	hypothetical protein Rv0836c
Rv0844c	941106	940456	505	940602	C	G	GGT->G	CGT->R	non-synonymous	nitrate/nitrite response transcriptional regulatory protein NarL
Rv0845	941190	942467	656	941845	C	A	GCG->A	GAG->E	non-synonymous	two component sensor kinase
Rv0848	944938	946056	277	945214	G	A	GGT->G	AGT->S	non-synonymous	cysteine synthase A CysK2
Rv0853c	951118	949436	1584	949535	T	C	GCA->A	GCG->A	synonymous	pyruvate or indole-3-pyruvate decarboxylase pdc
Rv0855	951632	952711	71	951702	C	T	GCC->A	GTC->V	non-synonymous	fatty-acid-CoA racemase
Rv0858c	954920	953727	820	954101	C	T	GCC->A	ACC->T	non-synonymous	aminotransferase
Rv0858c	954920	953727	453	954468	C	G	GCG->A	GCC->A	synonymous	aminotransferase
Rv0859	955077	956288	448	955524	A	G	AGC->S	GGC->G	non-synonymous	acetyl-CoA acetyltransferase
Rv0860	956293	958455	825	957117	T	C	GAT->D	GAC->D	synonymous	fatty oxidation protein FadB
Rv0862c	962612	960342	2246	960367	A	G	TTG->L	TCG->S	non-synonymous	hypothetical protein Rv0862c
Rv0872c	970244	968424	483	969762	C	G	GGG->G	GGC->G	synonymous	PE-PGRS family protein
Rv0874c	973706	972546	727	972980	C	T	GGC->G	AGC->S	non-synonymous	hypothetical protein Rv0874c
Rv0881	979362	980228	343	979704	G	C	GGC->G	CGC->R	non-synonymous	rRNA methyltransferase
Rv0890c	992596	989948	2596	990001	G	C	CCC->P	GCC->A	non-synonymous	LuxR family transcriptional regulator
Rv0890c	992596	989948	701	991896	T	C	GAG->E	GGG->G	non-synonymous	LuxR family transcriptional regulator
Rv0891c	993455	992598	110	993346	A	C	GTT->V	GGT->G	non-synonymous	transcriptional regulatory protein
Rv0893c	996295	995318	91	996205	T	C	AAG->K	GAG->E	non-synonymous	hypothetical protein Rv0893c
Rv0905	1008207	1008938	424	1008630	G	A	GTT->V	ATT->I	non-synonymous	enoyl-CoA hydratase
Rv0907	1010136	1011734	1376	1011511	A	C	TAC->Y	TCC->S	non-synonymous	hypothetical protein Rv0907
Rv0918	1024211	1024687	136	1024346	A	G	AGT->S	GGT->G	non-synonymous	hypothetical protein Rv0918
Rv0919	1024684	1025184	423	1025106	T	C	TTT->F	TTC->F	synonymous	hypothetical protein Rv0919
Rv0922	1027685	1029337	533	1028217	G	A	GGC->G	GAC->D	non-synonymous	transposase
Rv0930	1036999	1037925	14	1037012	T	C	ATG->M	ACG->T	non-synonymous	phosphate ABC transporter transmembrane protein
Rv0930	1036999	1037925	913	1037911	C	T	CGA->R	TGA->*	non-synonymous	phosphate ABC transporter transmembrane protein
Rv0932c	1041048	1039936	798	1040251	C	A	CCG->P	CCT->P	synonymous	periplasmic phosphate-binding lipoprotein PSTS2 (PBP-2) (PSTS2)
Rv0938	1046136	1048415	1030	1047165	T	C	TGC->C	CGC->R	non-synonymous	ATP-dependent DNA ligase
Rv0945	1054247	1055008	538	1054784	C	G	CGC->R	GGC->G	non-synonymous	short chain dehydrogenase
Rv0956	1067561	1068208	591	1068151	T	C	CAT->H	CAC->H	synonymous	phosphoribosylglycinamide formyltransferase
Rv0957	1068205	1069776	228	1068432	A	G	CCA->P	CCG->P	synonymous	bifunctional phosphoribosylaminoimidazolecarboxamide formyltransferase/IMP cyclohydrolase
Rv0958	1069883	1071262	820	1070702	T	C	TCC->S	CCC->P	non-synonymous	magnesium chelatase
Rv0959	1071255	1073273	712	1071966	A	G	AAC->N	GAC->D	non-synonymous	hypothetical protein Rv0959
Rv0962c	1075114	1074440	557	1074558	G	A	CCC->P	CTC->L	non-synonymous	lipoprotein LprP
Rv0964c	1076678	1076196	370	1076309	G	T	CCT->P	ACT->T	non-synonymous	hypothetical protein Rv0964c
Rv0965c	1077197	1076778	318	1076880	C	T	GCG->A	GCA->A	synonymous	hypothetical protein Rv0965c
Rv0966c	1077835	1077233	524	1077312	A	G	GTG->V	GCG->A	non-synonymous	hypothetical protein Rv0966c
Rv0969	1078743	1081055	1185	1079927	C	A	ACC->T	ACA->T	synonymous	metal cation transporter P-type ATPase CtpV
Rv0969	1078743	1081055	1450	1080192	G	A	GAT->D	AAT->N	non-synonymous	metal cation transporter P-type ATPase CtpV
Rv0970	1081052	1081684	630	1081681	T	C	GTT->V	GTC->V	synonymous	integral membrane protein
Rv0974c	1087345	1085756	153	1087193	G	C	AAC->N	AAG->K	non-synonymous	acetyl-/propionyl-CoA carboxylase subunit beta
Rv0977	1090373	1093144	688	1091060	G	T	GGG->G	TGG->W	non-synonymous	PE-PGRS family protein
Rv0978c	1094356	1093361	951	1093406	A	G	GTT->V	GTC->V	synonymous	PE-PGRS family protein
Rv0978c	1094356	1093361	429	1093928	G	A	AAC->N	AAT->N	synonymous	PE-PGRS family protein
Rv0978c	1094356	1093361	409	1093948	G	A	CTG->L	TTG->L	synonymous	PE-PGRS family protein
Rv0978c	1094356	1093361	408	1093949	C	G	TGG->W	TGC->C	non-synonymous	PE-PGRS family protein
Rv0978c	1094356	1093361	407	1093950	C	A	TGG->W	TTG->L	non-synonymous	PE-PGRS family protein
Rv0978c	1094356	1093361	406	1093951	A	T	TGG->W	AGG->R	non-synonymous	PE-PGRS family protein
Rv0978c	1094356	1093361	405	1093952	C	G	GGG->G	GGC->G	synonymous	PE-PGRS family protein
Rv0978c	1094356	1093361	398	1093959	T	G	AAC->N	ACC->T	non-synonymous	PE-PGRS family protein
Rv0978c	1094356	1093361	397	1093960	T	C	AAC->N	GAC->D	non-synonymous	PE-PGRS family protein
Rv0978c	1094356	1093361	396	1093961	A	C	GGT->G	GGG->G	synonymous	PE-PGRS family protein
Rv0978c	1094356	1093361	387	1093970	T	C	CAA->Q	CAG->Q	synonymous	PE-PGRS family protein
Rv0978c	1094356	1093361	378	1093979	C	G	GGG->G	GGC->G	synonymous	PE-PGRS family protein
Rv0978c	1094356	1093361	374	1093983	T	G	GAC->D	GCC->A	non-synonymous	PE-PGRS family protein
Rv0978c	1094356	1093361	373	1093984	C	G	GAC->D	CAC->H	non-synonymous	PE-PGRS family protein
Rv0978c	1094356	1093361	372	1093985	G	C	ATC->I	ATG->M	non-synonymous	PE-PGRS family protein
Rv0978c	1094356	1093361	371	1093986	A	G	ATC->I	ACC->T	non-synonymous	PE-PGRS family protein
Rv0978c	1094356	1093361	370	1093987	T	C	ATC->I	GTC->V	non-synonymous	PE-PGRS family protein
Rv0978c	1094356	1093361	364	1093993	T	G	AAC->N	CAC->H	non-synonymous	PE-PGRS family protein
Rv0978c	1094356	1093361	363	1093994	C	G	GCG->A	GCC->A	synonymous	PE-PGRS family protein
Rv0978c	1094356	1093361	354	1094003	G	A	GGC->G	GGT->G	synonymous	PE-PGRS family protein
Rv0978c	1094356	1093361	346	1094011	A	G	TTG->L	CTG->L	synonymous	PE-PGRS family protein
Rv0978c	1094356	1093361	345	1094012	T	C	CCA->P	CCG->P	synonymous	PE-PGRS family protein
Rv0978c	1094356	1093361	344	1094013	G	T	CCA->P	CAA->Q	non-synonymous	PE-PGRS family protein
Rv0978c	1094356	1093361	343	1094014	G	T	CCA->P	ACA->T	non-synonymous	PE-PGRS family protein
Rv0978c	1094356	1093361	336	1094021	G	C	ACC->T	ACG->T	synonymous	PE-PGRS family protein
Rv0978c	1094356	1093361	335	1094022	G	A	ACC->T	ATC->I	non-synonymous	PE-PGRS family protein
Rv0978c	1094356	1093361	334	1094023	T	C	ACC->T	GCC->A	non-synonymous	PE-PGRS family protein
Rv0978c	1094356	1093361	328	1094029	A	C	TCG->S	GCG->A	non-synonymous	PE-PGRS family protein
Rv0978c	1094356	1093361	325	1094032	G	C	CAG->Q	GAG->E	non-synonymous	PE-PGRS family protein
Rv0978c	1094356	1093361	323	1094034	A	G	GTT->V	GCT->A	non-synonymous	PE-PGRS family protein
Rv0978c	1094356	1093361	322	1094035	C	T	GTT->V	ATT->I	non-synonymous	PE-PGRS family protein
Rv0978c	1094356	1093361	321	1094036	G	C	CCC->P	CCG->P	synonymous	PE-PGRS family protein
Rv0978c	1094356	1093361	318	1094039	T	C	GCA->A	GCG->A	synonymous	PE-PGRS family protein
Rv0978c	1094356	1093361	316	1094041	C	T	GCA->A	ACA->T	non-synonymous	PE-PGRS family protein
Rv0978c	1094356	1093361	308	1094049	G	A	GCG->A	GTG->V	non-synonymous	PE-PGRS family protein
Rv0978c	1094356	1093361	306	1094051	A	C	GAT->D	GAG->E	non-synonymous	PE-PGRS family protein
Rv0978c	1094356	1093361	305	1094052	T	C	GAT->D	GGT->G	non-synonymous	PE-PGRS family protein
Rv0978c	1094356	1093361	303	1094054	G	C	CTC->L	CTG->L	synonymous	PE-PGRS family protein
Rv0978c	1094356	1093361	301	1094056	G	A	CTC->L	TTC->F	non-synonymous	PE-PGRS family protein
Rv0978c	1094356	1093361	298	1094059	C	G	GTG->V	CTG->L	non-synonymous	PE-PGRS family protein
Rv0978c	1094356	1093361	295	1094062	T	G	AAC->N	CAC->H	non-synonymous	PE-PGRS family protein
Rv0980c	1096451	1095078	808	1095644	C	T	GCG->A	ACG->T	non-synonymous	PE-PGRS family protein
Rv0980c	1096451	1095078	774	1095678	A	G	GGT->G	GGC->G	synonymous	PE-PGRS family protein
Rv0980c	1096451	1095078	217	1096235	C	G	GAA->E	CAA->Q	non-synonymous	PE-PGRS family protein
Rv0980c	1096451	1095078	213	1096239	G	A	TAC->Y	TAT->Y	synonymous	PE-PGRS family protein
Rv0980c	1096451	1095078	153	1096299	C	G	GCG->A	GCC->A	synonymous	PE-PGRS family protein
Rv0980c	1096451	1095078	54	1096398	C	T	GCG->A	GCA->A	synonymous	PE-PGRS family protein
Rv0981	1096816	1097508	405	1097220	C	T	TCC->S	TCT->S	synonymous	two component response transcriptional regulatory protein MprA
Rv0981	1096816	1097508	627	1097442	C	T	GAC->D	GAT->D	synonymous	two component response transcriptional regulatory protein MprA
Rv0982	1097508	1099022	1016	1098523	T	A	CTT->L	CAT->H	non-synonymous	two component sensor kinase MprB
Rv0983	1099066	1100460	1169	1100234	T	C	CTG->L	CCG->P	non-synonymous	serine protease PepD
Rv0986	1101803	1102549	315	1102117	G	A	GTG->V	GTA->V	synonymous	adhesion component transport ATP-binding protein ABC transporter
Rv0986	1101803	1102549	666	1102468	C	A	GGC->G	GGA->G	synonymous	adhesion component transport ATP-binding protein ABC transporter
Rv0987	1102542	1105109	105	1102646	G	A	GCG->A	GCA->A	synonymous	adhesion component transport transmembrane protein ABC transporter
Rv0987	1102542	1105109	1115	1103656	C	T	GCC->A	GTC->V	non-synonymous	adhesion component transport transmembrane protein ABC transporter
Rv0987	1102542	1105109	2149	1104690	T	G	TTC->F	GTC->V	non-synonymous	adhesion component transport transmembrane protein ABC transporter
Rv0988	1105116	1106276	571	1105686	C	G	CTG->L	GTG->V	non-synonymous	hypothetical protein Rv0988
Rv0988	1105116	1106276	572	1105687	T	C	CTG->L	CCG->P	non-synonymous	hypothetical protein Rv0988
Rv0989c	1107382	1106405	961	1106422	T	C	ATA->I	GTA->V	non-synonymous	polyprenyl-diphosphate synthase
Rv0990c	1108099	1107443	160	1107940	A	C	TCC->S	GCC->A	non-synonymous	hypothetical protein Rv0990c
Rv0993	1109272	1110192	704	1109975	A	G	CAG->Q	CGG->R	non-synonymous	UTP--glucose-1-phosphate uridylyltransferase GalU
Rv0995	1111612	1112223	67	1111678	G	A	GGC->G	AGC->S	non-synonymous	ribosomal-protein-alanine acetyltransferase
Rv1000c	1117148	1116531	342	1116807	G	A	TAC->Y	TAT->Y	synonymous	hypothetical protein Rv1000c
Rv1001	1117185	1118393	695	1117879	A	C	GAG->E	GCG->A	non-synonymous	arginine deiminase
Rv1007c	1127003	1125444	115	1126889	G	C	CGC->R	GGC->G	non-synonymous	methionyl-tRNA synthetase
Rv1008	1127089	1127883	405	1127493	T	C	AAT->N	AAC->N	synonymous	deoxyribonuclease TatD (YjjV protein)
Rv1008	1127089	1127883	560	1127648	C	A	ACC->T	AAC->N	non-synonymous	deoxyribonuclease TatD (YjjV protein)
Rv1009	1128091	1129179	793	1128883	G	A	GTG->V	ATG->M	non-synonymous	resuscitation-promoting factor rpfB
Rv1023	1144564	1145853	22	1144585	A	G	AGG->R	GGG->G	non-synonymous	phosphopyruvate hydratase
Rv1023	1144564	1145853	1285	1145848	A	C	AAA->K	CAA->Q	non-synonymous	phosphopyruvate hydratase
Rv1027c	1149107	1148427	178	1148930	C	T	GGT->G	AGT->S	non-synonymous	transcriptional regulatory protein KdpE
Rv1028c	1151686	1149104	2136	1149551	C	T	GAG->E	GAA->E	synonymous	sensor protein KDPD
Rv1028c	1151686	1149104	1102	1150585	G	A	CCC->P	TCC->S	non-synonymous	sensor protein KDPD
Rv1028c	1151686	1149104	633	1151054	C	G	TCG->S	TCC->S	synonymous	sensor protein KDPD
Rv1031	1155853	1156422	82	1155934	A	G	ACC->T	GCC->A	non-synonymous	potassium-transporting ATPase subunit C
Rv1037c	1160828	1160544	59	1160770	T	A	CAG->Q	CTG->L	non-synonymous	putative ESAT-6 like protein ESXI (ESAT-6 like protein 1)
Rv1040c	1163376	1162549	243	1163134	T	C	GGA->G	GGG->G	synonymous	PE family protein
Rv1041c	1165435	1164572	322	1165114	C	T	GAT->D	AAT->N	non-synonymous	IS like-2 transposase
Rv1042c	1165499	1165092	386	1165114	C	T	GGA->G	GAA->E	non-synonymous	IS like-2 transposase
Rv1046c	1169228	1168704	453	1168776	T	G	AGA->R	AGC->S	non-synonymous	hypothetical protein Rv1046c
Rv1047	1169423	1170670	510	1169932	G	A	GTG->V	GTA->V	synonymous	transposase
Rv1047	1169423	1170670	543	1169965	G	A	GGG->G	GGA->G	synonymous	transposase
Rv1048c	1172153	1171038	69	1172085	C	A	GAG->E	GAT->D	non-synonymous	hypothetical protein Rv1048c
Rv1049	1172386	1172832	398	1172783	T	C	GTG->V	GCG->A	non-synonymous	transcriptional repressor protein
Rv1050	1172881	1173786	870	1173750	G	T	GCG->A	GCT->A	synonymous	oxidoreductase
Rv1054	1176928	1177242	230	1177157	G	A	GGC->G	GAC->D	non-synonymous	integrase
Rv1056	1177628	1178392	12	1177639	T	C	GAT->D	GAC->D	synonymous	hypothetical protein Rv1056
Rv1056	1177628	1178392	489	1178116	T	C	ACT->T	ACC->T	synonymous	hypothetical protein Rv1056
Rv1067c	1190424	1188421	967	1189458	C	T	GAC->D	AAC->N	non-synonymous	PE-PGRS family protein
Rv1067c	1190424	1188421	966	1189459	A	G	GGT->G	GGC->G	synonymous	PE-PGRS family protein
Rv1067c	1190424	1188421	915	1189510	A	G	GGT->G	GGC->G	synonymous	PE-PGRS family protein
Rv1067c	1190424	1188421	900	1189525	A	T	GGT->G	GGA->G	synonymous	PE-PGRS family protein
Rv1067c	1190424	1188421	897	1189528	A	G	GGT->G	GGC->G	synonymous	PE-PGRS family protein
Rv1067c	1190424	1188421	890	1189535	C	G	GGC->G	GCC->A	non-synonymous	PE-PGRS family protein
Rv1067c	1190424	1188421	885	1189540	C	G	CCG->P	CCC->P	synonymous	PE-PGRS family protein
Rv1067c	1190424	1188421	883	1189542	G	T	CCG->P	ACG->T	non-synonymous	PE-PGRS family protein
Rv1067c	1190424	1188421	882	1189543	T	G	CAA->Q	CAC->H	non-synonymous	PE-PGRS family protein
Rv1067c	1190424	1188421	880	1189545	G	C	CAA->Q	GAA->E	non-synonymous	PE-PGRS family protein
Rv1067c	1190424	1188421	877	1189548	T	C	AGC->S	GGC->G	non-synonymous	PE-PGRS family protein
Rv1067c	1190424	1188421	873	1189552	T	C	CCA->P	CCG->P	synonymous	PE-PGRS family protein
Rv1067c	1190424	1188421	872	1189553	G	T	CCA->P	CAA->Q	non-synonymous	PE-PGRS family protein
Rv1067c	1190424	1188421	871	1189554	G	C	CCA->P	GCA->A	non-synonymous	PE-PGRS family protein
Rv1067c	1190424	1188421	867	1189558	G	C	CCC->P	CCG->P	synonymous	PE-PGRS family protein
Rv1067c	1190424	1188421	866	1189559	G	T	CCC->P	CAC->H	non-synonymous	PE-PGRS family protein
Rv1067c	1190424	1188421	863	1189562	G	A	GCC->A	GTC->V	non-synonymous	PE-PGRS family protein
Rv1067c	1190424	1188421	847	1189578	G	C	CAA->Q	GAA->E	non-synonymous	PE-PGRS family protein
Rv1067c	1190424	1188421	846	1189579	T	C	GGA->G	GGG->G	synonymous	PE-PGRS family protein
Rv1067c	1190424	1188421	840	1189585	G	C	GCC->A	GCG->A	synonymous	PE-PGRS family protein
Rv1067c	1190424	1188421	839	1189586	G	T	GCC->A	GAC->D	non-synonymous	PE-PGRS family protein
Rv1067c	1190424	1188421	838	1189587	C	G	GCC->A	CCC->P	non-synonymous	PE-PGRS family protein
Rv1067c	1190424	1188421	837	1189588	C	A	GGG->G	GGT->G	synonymous	PE-PGRS family protein
Rv1067c	1190424	1188421	829	1189596	C	T	GCC->A	ACC->T	non-synonymous	PE-PGRS family protein
Rv1067c	1190424	1188421	828	1189597	G	T	GGC->G	GGA->G	synonymous	PE-PGRS family protein
Rv1067c	1190424	1188421	819	1189606	A	G	GGT->G	GGC->G	synonymous	PE-PGRS family protein
Rv1067c	1190424	1188421	812	1189613	G	A	GCC->A	GTC->V	non-synonymous	PE-PGRS family protein
Rv1067c	1190424	1188421	737	1189688	C	T	AGC->S	AAC->N	non-synonymous	PE-PGRS family protein
Rv1067c	1190424	1188421	736	1189689	T	C	AGC->S	GGC->G	non-synonymous	PE-PGRS family protein
Rv1067c	1190424	1188421	722	1189703	G	A	GCC->A	GTC->V	non-synonymous	PE-PGRS family protein
Rv1067c	1190424	1188421	721	1189704	C	T	GCC->A	ACC->T	non-synonymous	PE-PGRS family protein
Rv1067c	1190424	1188421	720	1189705	A	G	GGT->G	GGC->G	synonymous	PE-PGRS family protein
Rv1067c	1190424	1188421	716	1189709	T	G	AAC->N	ACC->T	non-synonymous	PE-PGRS family protein
Rv1067c	1190424	1188421	715	1189710	T	C	AAC->N	GAC->D	non-synonymous	PE-PGRS family protein
Rv1068c	1192148	1190757	696	1191453	T	C	GGA->G	GGG->G	synonymous	PE-PGRS family protein
Rv1068c	1192148	1190757	652	1191497	T	A	ACG->T	TCG->S	non-synonymous	PE-PGRS family protein
Rv1068c	1192148	1190757	408	1191741	G	A	TAC->Y	TAT->Y	synonymous	PE-PGRS family protein
Rv1076	1200767	1201660	815	1201581	A	C	CAG->Q	CCG->P	non-synonymous	lipase LipU
Rv1086	1210595	1211383	775	1211369	A	C	AGC->S	CGC->R	non-synonymous	short (C15) chain Z-isoprenyl diphosphate synthase (Z-FPP synthase) (Z-farnesyl diphosphate synthase) (Z-FPP synthetase) (Z-farnesyl diphosphate synthetase) (geranyltranstransferase) (farnesyl pyrophosphate synthetase)
Rv1087	1211560	1213863	873	1212432	C	A	GGC->G	GGA->G	synonymous	PE-PGRS family protein
Rv1090	1215599	1216054	144	1215742	G	A	CAG->Q	CAA->Q	synonymous	endo-1,4-beta-glucanase
Rv1090	1215599	1216054	145	1215743	C	A	CAG->Q	AAG->K	non-synonymous	endo-1,4-beta-glucanase
Rv1091	1216469	1219030	597	1217065	C	A	GCC->A	GCA->A	synonymous	PE-PGRS family protein
Rv1091	1216469	1219030	689	1217157	A	C	GAC->D	GCC->A	non-synonymous	PE-PGRS family protein
Rv1091	1216469	1219030	2190	1218658	G	C	GGG->G	GGC->G	synonymous	PE-PGRS family protein
Rv1091	1216469	1219030	2428	1218896	G	A	GGC->G	AGC->S	non-synonymous	PE-PGRS family protein
Rv1093	1220574	1221854	107	1220680	T	C	GTA->V	GCA->A	non-synonymous	serine hydroxymethyltransferase
Rv1099c	1228582	1227596	753	1227830	G	T	ACC->T	ACA->T	synonymous	fructose 1,6-bisphosphatase II
Rv1102c	1230971	1230660	194	1230778	G	A	ACC->T	ATC->I	non-synonymous	hypothetical protein Rv1102c
Rv1121	1243707	1245107	994	1244700	T	C	TTA->L	CTA->L	synonymous	glucose-6-phosphate 1-dehydrogenase
Rv1125	1248082	1249326	301	1248382	A	G	AGC->S	GGC->G	non-synonymous	hypothetical protein Rv1125
Rv1125	1248082	1249326	855	1248936	G	C	CCG->P	CCC->P	synonymous	hypothetical protein Rv1125
Rv1125	1248082	1249326	897	1248978	T	C	GCT->A	GCC->A	synonymous	hypothetical protein Rv1125
Rv1127c	1251404	1249932	1065	1250340	A	G	GCT->A	GCC->A	synonymous	pyruvate phosphate dikinase
Rv1127c	1251404	1249932	206	1251199	C	T	GGA->G	GAA->E	non-synonymous	pyruvate phosphate dikinase
Rv1128c	1252972	1251617	809	1252164	T	C	GAA->E	GGA->G	non-synonymous	hypothetical protein Rv1128c
Rv1130	1254555	1256135	8	1254562	A	G	GAT->D	GGT->G	non-synonymous	hypothetical protein Rv1130
Rv1130	1254555	1256135	71	1254625	G	A	CGG->R	CAG->Q	non-synonymous	hypothetical protein Rv1130
Rv1131	1256132	1257313	782	1256913	A	T	AAC->N	ATC->I	non-synonymous	citrate synthase
Rv1135c	1264128	1262272	1165	1262964	C	T	GGC->G	AGC->S	non-synonymous	PPE family protein
Rv1140	1267347	1268195	251	1267597	G	A	GGC->G	GAC->D	non-synonymous	integral membrane protein
Rv1148c	1277748	1276300	1161	1276588	C	G	GCG->A	GCC->A	synonymous	hypothetical protein Rv1148c
Rv1148c	1277748	1276300	1066	1276683	T	G	AAC->N	CAC->H	non-synonymous	hypothetical protein Rv1148c
Rv1148c	1277748	1276300	1065	1276684	G	C	GCC->A	GCG->A	synonymous	hypothetical protein Rv1148c
Rv1148c	1277748	1276300	1060	1276689	G	T	CAC->H	AAC->N	non-synonymous	hypothetical protein Rv1148c
Rv1148c	1277748	1276300	907	1276842	G	A	CTG->L	TTG->L	synonymous	hypothetical protein Rv1148c
Rv1148c	1277748	1276300	906	1276843	G	C	GGC->G	GGG->G	synonymous	hypothetical protein Rv1148c
Rv1148c	1277748	1276300	903	1276846	C	G	CGG->R	CGC->R	synonymous	hypothetical protein Rv1148c
Rv1148c	1277748	1276300	896	1276853	G	C	GCG->A	GGG->G	non-synonymous	hypothetical protein Rv1148c
Rv1148c	1277748	1276300	889	1276860	A	G	TTG->L	CTG->L	synonymous	hypothetical protein Rv1148c
Rv1148c	1277748	1276300	888	1276861	A	T	TTT->F	TTA->L	non-synonymous	hypothetical protein Rv1148c
Rv1148c	1277748	1276300	885	1276864	C	A	GCG->A	GCT->A	synonymous	hypothetical protein Rv1148c
Rv1148c	1277748	1276300	884	1276865	G	C	GCG->A	GGG->G	non-synonymous	hypothetical protein Rv1148c
Rv1148c	1277748	1276300	882	1276867	A	G	GAT->D	GAC->D	synonymous	hypothetical protein Rv1148c
Rv1148c	1277748	1276300	876	1276873	A	G	AAT->N	AAC->N	synonymous	hypothetical protein Rv1148c
Rv1148c	1277748	1276300	874	1276875	T	G	AAT->N	CAT->H	non-synonymous	hypothetical protein Rv1148c
Rv1148c	1277748	1276300	873	1276876	G	T	CGC->R	CGA->R	synonymous	hypothetical protein Rv1148c
Rv1148c	1277748	1276300	867	1276882	C	G	GCG->A	GCC->A	synonymous	hypothetical protein Rv1148c
Rv1148c	1277748	1276300	864	1276885	C	T	CAG->Q	CAA->Q	synonymous	hypothetical protein Rv1148c
Rv1149	1277893	1278300	386	1278278	G	A	GGA->G	GAA->E	non-synonymous	transposase
Rv1154c	1281484	1280843	367	1281118	T	C	ACG->T	GCG->A	non-synonymous	hypothetical protein Rv1154c
Rv1155	1281429	1281872	343	1281771	T	C	TCG->S	CCG->P	non-synonymous	hypothetical protein Rv1155
Rv1159	1284992	1286287	10	1285001	A	C	ACC->T	CCC->P	non-synonymous	mannosyltransferase
Rv1160	1286595	1287020	172	1286766	G	C	GGA->G	CGA->R	non-synonymous	7,8-dihydro-8-oxoguanine-triphosphatase
Rv1161	1287328	1291026	1371	1288698	G	A	GGG->G	GGA->G	synonymous	respiratory nitrate reductase subunit alpha NarG
Rv1162	1291065	1292741	1038	1292102	A	G	CCA->P	CCG->P	synonymous	respiratory nitrate reductase subunit beta NarH
Rv1163	1292798	1293403	536	1293333	C	G	CCG->P	CGG->R	non-synonymous	respiratory nitrate reductase subunit delta NarJ
Rv1168c	1299804	1298764	500	1299305	G	A	CCG->P	CTG->L	non-synonymous	PPE family protein
Rv1170	1300304	1301215	486	1300789	T	C	GGT->G	GGC->G	synonymous	N-Acetyl-1-D-myo-Inosityl-2-amino-2-deoxy-alpha- D-glucopyranoside deacetylase mshB (GlcNAc-Ins deacetylase)
Rv1175c	1308226	1306202	1968	1306259	A	G	GCT->A	GCC->A	synonymous	NADPH dependent 2,4-dienoyl-CoA reductase
Rv1175c	1308226	1306202	629	1307598	C	G	TGC->C	TCC->S	non-synonymous	NADPH dependent 2,4-dienoyl-CoA reductase
Rv1180	1313725	1315191	1467	1315191	A	C	TAA->*	TAC->Y	non-synonymous	polyketide beta-ketoacyl synthase PKS3
Rv1181	1315234	1319982	651	1315884	G	A	GCG->A	GCA->A	synonymous	polyketide beta-ketoacyl synthase PKS4
Rv1181	1315234	1319982	2422	1317655	C	T	CTG->L	TTG->L	synonymous	polyketide beta-ketoacyl synthase PKS4
Rv1182	1320035	1321453	554	1320588	T	C	ATG->M	ACG->T	non-synonymous	polyketide synthase associated protein PapA3
Rv1183	1321520	1324528	1222	1322741	A	G	ACT->T	GCT->A	non-synonymous	transmembrane transport protein MmpL10
Rv1185c	1327512	1325776	111	1327402	T	C	GAA->E	GAG->E	synonymous	acyl-CoA synthetase
Rv1186c	1329305	1327689	1416	1327890	G	A	GAC->D	GAT->D	synonymous	hypothetical protein Rv1186c
Rv1186c	1329305	1327689	619	1328687	G	C	CCC->P	GCC->A	non-synonymous	hypothetical protein Rv1186c
Rv1186c	1329305	1327689	72	1329234	G	A	GAC->D	GAT->D	synonymous	hypothetical protein Rv1186c
Rv1188	1331021	1332010	676	1331696	A	C	AGG->R	CGG->R	synonymous	proline dehydrogenase
Rv1190	1332980	1333858	690	1333669	T	G	GGT->G	GGG->G	synonymous	hypothetical protein Rv1190
Rv1193	1335794	1337215	371	1336164	C	T	CCG->P	CTG->L	non-synonymous	acyl-CoA synthetase
Rv1194c	1338513	1337248	706	1337808	C	G	GTG->V	CTG->L	non-synonymous	hypothetical protein Rv1194c
Rv1196	1339349	1340524	860	1340208	G	A	CGG->R	CAG->Q	non-synonymous	PPE family protein
Rv1199c	1342605	1341358	510	1342096	C	T	GTG->V	GTA->V	synonymous	transposase
Rv1199c	1342605	1341358	25	1342581	T	C	ACC->T	GCC->A	non-synonymous	transposase
Rv1206	1349332	1351125	402	1349733	G	C	GAG->E	GAC->D	non-synonymous	acyl-CoA synthetase
Rv1207	1351191	1352147	217	1351407	C	G	CGG->R	GGG->G	non-synonymous	dihydropteroate synthase 2 FolP2
Rv1214c	1357625	1357293	318	1357308	T	G	GCA->A	GCC->A	synonymous	PE family protein
Rv1217c	1361801	1360155	1593	1360209	T	C	GCA->A	GCG->A	synonymous	tetronasin-transport integral membrane protein ABC transporter
Rv1217c	1361801	1360155	612	1361190	G	A	AGC->S	AGT->S	synonymous	tetronasin-transport integral membrane protein ABC transporter
Rv1217c	1361801	1360155	517	1361285	C	T	GCT->A	ACT->T	non-synonymous	tetronasin-transport integral membrane protein ABC transporter
Rv1218c	1362733	1361798	728	1362006	T	C	CAA->Q	CGA->R	non-synonymous	tetronasin-transport ATP-binding protein ABC transporter
Rv1224	1367463	1367858	22	1367484	T	G	TGG->W	GGG->G	non-synonymous	sec-independent translocase
Rv1230c	1374197	1372962	133	1374065	T	C	AGC->S	GGC->G	non-synonymous	hypothetical protein Rv1230c
Rv1232c	1376168	1374861	1125	1375044	C	G	GCG->A	GCC->A	synonymous	hypothetical protein Rv1232c
Rv1232c	1376168	1374861	445	1375724	A	C	TGC->C	GGC->G	non-synonymous	hypothetical protein Rv1232c
Rv1239c	1383042	1381942	415	1382628	T	C	AAA->K	GAA->E	non-synonymous	magnesium/cobalt transporter CorA
Rv1248c	1393052	1389357	3083	1389970	C	T	CGG->R	CAG->Q	non-synonymous	alpha-ketoglutarate decarboxylase
Rv1248c	1393052	1389357	2290	1390763	C	T	GTG->V	ATG->M	non-synonymous	alpha-ketoglutarate decarboxylase
Rv1249c	1393982	1393194	357	1393626	A	G	CTT->L	CTC->L	synonymous	hypothetical protein Rv1249c
Rv1251c	1399240	1395821	2319	1396922	T	C	ACA->T	ACG->T	synonymous	hypothetical protein Rv1251c
Rv1258c	1407340	1406081	1036	1406305	C	T	GGC->G	AGC->S	non-synonymous	integral membrane transport protein
Rv1259	1407339	1408238	816	1408154	G	A	CAG->Q	CAA->Q	synonymous	hypothetical protein Rv1259
Rv1263	1410431	1411819	780	1411210	T	G	GTT->V	GTG->V	synonymous	amidase
Rv1266c	1415840	1413960	1820	1414021	C	T	CGG->R	CAG->Q	non-synonymous	transmembrane serine/threonine-protein kinase H
Rv1278	1427414	1430041	1702	1429115	A	G	ATC->I	GTC->V	non-synonymous	hypothetical protein Rv1278
Rv1286	1438907	1440751	1563	1440469	C	G	CCC->P	CCG->P	synonymous	bifunctional sulfate adenylyltransferase subunit 1/adenylylsulfate kinase protein
Rv1291c	1445834	1445499	54	1445781	A	G	GCT->A	GCC->A	synonymous	hypothetical protein Rv1291c
Rv1297	1453204	1455012	405	1453608	T	C	GGT->G	GGC->G	synonymous	transcription termination factor Rho
Rv1300	1456565	1457542	580	1457144	C	T	CGC->R	TGC->C	non-synonymous	hypothetical protein Rv1300
Rv1313c	1469505	1468171	1298	1468208	A	C	CTG->L	CGG->R	non-synonymous	transposase
Rv1313c	1469505	1468171	1047	1468459	A	G	GGT->G	GGC->G	synonymous	transposase
Rv1313c	1469505	1468171	1014	1468492	C	A	CTG->L	CTT->L	synonymous	transposase
Rv1316c	1477631	1477134	36	1477596	C	T	GGG->G	GGA->G	synonymous	methylated-DNA--protein-cysteine methyltransferase
Rv1317c	1479118	1477628	1385	1477734	A	C	GTG->V	GGG->G	non-synonymous	bifunctional methylated-DNA--protein-cysteine methyltransferase/O-6-methylguanine-DNA transcription regulator
Rv1317c	1479118	1477628	34	1479085	T	C	ATC->I	GTC->V	non-synonymous	bifunctional methylated-DNA--protein-cysteine methyltransferase/O-6-methylguanine-DNA transcription regulator
Rv1319c	1482501	1480894	1530	1480972	T	C	GAA->E	GAG->E	synonymous	adenylate cyclase
Rv1320c	1484217	1482514	1591	1482627	T	C	ACG->T	GCG->A	non-synonymous	adenylate cyclase
Rv1321	1484279	1484959	430	1484708	A	C	AGC->S	CGC->R	non-synonymous	hypothetical protein Rv1321
Rv1326c	1492312	1490117	1408	1490905	A	G	TCT->S	CCT->P	non-synonymous	glycogen branching enzyme
Rv1329c	1499189	1497195	239	1498951	G	T	ACG->T	AAG->K	non-synonymous	ATP-dependent helicase DING
Rv1330c	1500559	1499213	1286	1499274	C	G	GGC->G	GCC->A	non-synonymous	nicotinate phosphoribosyltransferase
Rv1333	1501599	1502633	102	1501700	G	A	GTG->V	GTA->V	synonymous	hydrolase
Rv1351	1518231	1518560	43	1518273	A	G	AGG->R	GGG->G	non-synonymous	hypothetical protein Rv1351
Rv1356c	1524820	1524029	489	1524332	G	T	GCC->A	GCA->A	synonymous	hypothetical protein Rv1356c
Rv1358	1526612	1530091	208	1526819	C	A	CGG->R	AGG->R	synonymous	transcriptional regulatory protein
Rv1361c	1533633	1532443	393	1533241	G	C	ACC->T	ACG->T	synonymous	PPE family protein
Rv1361c	1533633	1532443	51	1533583	G	A	TAC->Y	TAT->Y	synonymous	PPE family protein
Rv1364c	1537644	1535683	1394	1536251	G	T	GCG->A	GAG->E	non-synonymous	hypothetical protein Rv1364c
Rv1367c	1540645	1539512	505	1540141	T	C	ATC->I	GTC->V	non-synonymous	hypothetical protein Rv1367c
Rv1368	1541020	1541805	779	1541798	C	T	GCG->A	GTG->V	non-synonymous	lipoprotein LprF
Rv1371	1543359	1544828	897	1544255	C	T	CGC->R	CGT->R	synonymous	hypothetical protein Rv1371
Rv1373	1546012	1546992	692	1546703	C	T	CCG->P	CTG->L	non-synonymous	glycolipid sulfotransferase
Rv1374c	1547530	1547072	406	1547125	T	C	ACA->T	GCA->A	non-synonymous	hypothetical protein Rv1374c
Rv1378c	1552655	1551228	109	1552547	G	A	CGG->R	TGG->W	non-synonymous	hypothetical protein Rv1378c
Rv1383	1555971	1557101	817	1556787	T	C	TCG->S	CCG->P	non-synonymous	carbamoyl phosphate synthase small subunit
Rv1387	1561769	1563388	171	1561939	G	C	GAG->E	GAC->D	non-synonymous	PPE family protein
Rv1388	1563694	1564266	24	1563717	C	T	GTC->V	GTT->V	synonymous	putative integration host factor MIHF
Rv1394c	1570969	1569584	404	1570566	C	A	CGG->R	CTG->L	non-synonymous	cytochrome P450 132
Rv1396c	1573857	1572127	781	1573077	C	A	GGC->G	TGC->C	non-synonymous	PE-PGRS family protein
Rv1396c	1573857	1572127	198	1573660	T	G	AGA->R	AGC->S	non-synonymous	PE-PGRS family protein
Rv1400c	1576796	1575834	316	1576481	T	G	ACC->T	CCC->P	non-synonymous	lipase LipH
Rv1400c	1576796	1575834	270	1576527	G	T	TTC->F	TTA->L	non-synonymous	lipase LipH
Rv1401	1576930	1577532	312	1577241	G	A	CCG->P	CCA->P	synonymous	hypothetical protein Rv1401
Rv1412	1588567	1589172	333	1588899	G	T	GCG->A	GCT->A	synonymous	riboflavin synthase subunit alpha
Rv1413	1589386	1589901	33	1589418	C	T	GTC->V	GTT->V	synonymous	hypothetical protein Rv1413
Rv1420	1594042	1595982	865	1594906	G	A	GTC->V	ATC->I	non-synonymous	excinuclease ABC subunit C
Rv1420	1594042	1595982	1301	1595342	T	C	GTG->V	GCG->A	non-synonymous	excinuclease ABC subunit C
Rv1430	1606386	1607972	288	1606673	G	T	GCG->A	GCT->A	synonymous	PE family protein
Rv1431	1608083	1609852	194	1608276	A	C	AAC->N	ACC->T	non-synonymous	hypothetical protein Rv1431
Rv1431	1608083	1609852	1758	1609840	A	G	CCA->P	CCG->P	synonymous	hypothetical protein Rv1431
Rv1438	1615564	1616349	498	1616061	C	T	AGC->S	AGT->S	synonymous	triosephosphate isomerase
Rv1439c	1617386	1616961	85	1617302	G	T	CTT->L	ATT->I	non-synonymous	hypothetical protein Rv1439c
Rv1441c	1619684	1618209	707	1618978	T	C	GAT->D	GGT->G	non-synonymous	PE-PGRS family protein
Rv1442	1619791	1622091	391	1620181	C	G	CTC->L	GTC->V	non-synonymous	biotin sulfoxide reductase
Rv1446c	1625365	1624454	575	1624791	C	G	CGA->R	CCA->P	non-synonymous	putative OXPP cycle protein OPCA
Rv1447c	1626962	1625418	787	1626176	C	T	GAT->D	AAT->N	non-synonymous	glucose-6-phosphate 1-dehydrogenase
Rv1448c	1628080	1626959	730	1627351	T	C	ACC->T	GCC->A	non-synonymous	transaldolase
Rv1449c	1630199	1628097	52	1630148	A	C	TAC->Y	GAC->D	non-synonymous	transketolase
Rv1450c	1634627	1630638	1911	1632717	G	A	GGC->G	GGT->G	synonymous	PE-PGRS family protein
Rv1450c	1634627	1630638	1908	1632720	G	A	AAC->N	AAT->N	synonymous	PE-PGRS family protein
Rv1450c	1634627	1630638	1906	1632722	T	G	AAC->N	CAC->H	non-synonymous	PE-PGRS family protein
Rv1450c	1634627	1630638	1905	1632723	G	A	GGC->G	GGT->G	synonymous	PE-PGRS family protein
Rv1450c	1634627	1630638	1784	1632844	G	C	ACC->T	AGC->S	non-synonymous	PE-PGRS family protein
Rv1450c	1634627	1630638	210	1634418	C	T	GCG->A	GCA->A	synonymous	PE-PGRS family protein
Rv1450c	1634627	1630638	105	1634523	C	T	TCG->S	TCA->S	synonymous	PE-PGRS family protein
Rv1450c	1634627	1630638	90	1634538	C	G	GCG->A	GCC->A	synonymous	PE-PGRS family protein
Rv1450c	1634627	1630638	89	1634539	G	C	GCG->A	GGG->G	non-synonymous	PE-PGRS family protein
Rv1450c	1634627	1630638	88	1634540	C	T	GCG->A	ACG->T	non-synonymous	PE-PGRS family protein
Rv1450c	1634627	1630638	87	1634541	A	G	AAT->N	AAC->N	synonymous	PE-PGRS family protein
Rv1450c	1634627	1630638	81	1634547	C	T	GCG->A	GCA->A	synonymous	PE-PGRS family protein
Rv1450c	1634627	1630638	80	1634548	G	A	GCG->A	GTG->V	non-synonymous	PE-PGRS family protein
Rv1450c	1634627	1630638	78	1634550	G	A	GGC->G	GGT->G	synonymous	PE-PGRS family protein
Rv1450c	1634627	1630638	48	1634580	T	C	TTA->L	TTG->L	synonymous	PE-PGRS family protein
Rv1450c	1634627	1630638	47	1634581	A	G	TTA->L	TCA->S	non-synonymous	PE-PGRS family protein
Rv1450c	1634627	1630638	42	1634586	T	C	GCA->A	GCG->A	synonymous	PE-PGRS family protein
Rv1450c	1634627	1630638	39	1634589	G	C	GCC->A	GCG->A	synonymous	PE-PGRS family protein
Rv1450c	1634627	1630638	36	1634592	C	G	GCG->A	GCC->A	synonymous	PE-PGRS family protein
Rv1450c	1634627	1630638	19	1634609	C	T	GCC->A	ACC->T	non-synonymous	PE-PGRS family protein
Rv1450c	1634627	1630638	18	1634610	C	T	GTG->V	GTA->V	synonymous	PE-PGRS family protein
Rv1452c	1638229	1636004	2059	1636171	T	C	AAC->N	GAC->D	non-synonymous	PE-PGRS family protein
Rv1452c	1638229	1636004	2058	1636172	T	G	GGA->G	GGC->G	synonymous	PE-PGRS family protein
Rv1452c	1638229	1636004	1404	1636826	C	A	GGG->G	GGT->G	synonymous	PE-PGRS family protein
Rv1452c	1638229	1636004	1321	1636909	C	G	GCC->A	CCC->P	non-synonymous	PE-PGRS family protein
Rv1452c	1638229	1636004	1312	1636918	C	T	GCC->A	ACC->T	non-synonymous	PE-PGRS family protein
Rv1452c	1638229	1636004	1303	1636927	C	T	GAC->D	AAC->N	non-synonymous	PE-PGRS family protein
Rv1452c	1638229	1636004	1302	1636928	A	G	GGT->G	GGC->G	synonymous	PE-PGRS family protein
Rv1452c	1638229	1636004	1296	1636934	A	G	CAT->H	CAC->H	synonymous	PE-PGRS family protein
Rv1452c	1638229	1636004	1294	1636936	G	T	CAT->H	AAT->N	non-synonymous	PE-PGRS family protein
Rv1452c	1638229	1636004	1286	1636944	G	T	GCC->A	GAC->D	non-synonymous	PE-PGRS family protein
Rv1452c	1638229	1636004	1285	1636945	C	G	GCC->A	CCC->P	non-synonymous	PE-PGRS family protein
Rv1452c	1638229	1636004	1284	1636946	C	A	GGG->G	GGT->G	synonymous	PE-PGRS family protein
Rv1452c	1638229	1636004	1250	1636980	G	T	CCC->P	CAC->H	non-synonymous	PE-PGRS family protein
Rv1452c	1638229	1636004	1249	1636981	G	T	CCC->P	ACC->T	non-synonymous	PE-PGRS family protein
Rv1452c	1638229	1636004	1247	1636983	C	G	GGC->G	GCC->A	non-synonymous	PE-PGRS family protein
Rv1452c	1638229	1636004	1133	1637097	G	A	GCT->A	GTT->V	non-synonymous	PE-PGRS family protein
Rv1452c	1638229	1636004	1125	1637105	A	G	GCT->A	GCC->A	synonymous	PE-PGRS family protein
Rv1452c	1638229	1636004	1124	1637106	G	A	GCT->A	GTT->V	non-synonymous	PE-PGRS family protein
Rv1452c	1638229	1636004	1119	1637111	G	A	GGC->G	GGT->G	synonymous	PE-PGRS family protein
Rv1452c	1638229	1636004	1116	1637114	C	G	ATG->M	ATC->I	non-synonymous	PE-PGRS family protein
Rv1452c	1638229	1636004	1115	1637115	A	G	ATG->M	ACG->T	non-synonymous	PE-PGRS family protein
Rv1452c	1638229	1636004	1114	1637116	T	C	ATG->M	GTG->V	non-synonymous	PE-PGRS family protein
Rv1452c	1638229	1636004	1113	1637117	C	A	GGG->G	GGT->G	synonymous	PE-PGRS family protein
Rv1452c	1638229	1636004	1106	1637124	T	C	AAC->N	AGC->S	non-synonymous	PE-PGRS family protein
Rv1452c	1638229	1636004	1098	1637132	A	G	GAT->D	GAC->D	synonymous	PE-PGRS family protein
Rv1452c	1638229	1636004	1097	1637133	T	G	GAT->D	GCT->A	non-synonymous	PE-PGRS family protein
Rv1452c	1638229	1636004	1088	1637142	T	G	AAC->N	ACC->T	non-synonymous	PE-PGRS family protein
Rv1452c	1638229	1636004	1087	1637143	T	C	AAC->N	GAC->D	non-synonymous	PE-PGRS family protein
Rv1452c	1638229	1636004	1086	1637144	A	C	GAT->D	GAG->E	non-synonymous	PE-PGRS family protein
Rv1452c	1638229	1636004	1084	1637146	C	G	GAT->D	CAT->H	non-synonymous	PE-PGRS family protein
Rv1452c	1638229	1636004	1083	1637147	C	T	GGG->G	GGA->G	synonymous	PE-PGRS family protein
Rv1452c	1638229	1636004	1080	1637150	A	G	GCT->A	GCC->A	synonymous	PE-PGRS family protein
Rv1452c	1638229	1636004	1078	1637152	C	T	GCT->A	ACT->T	non-synonymous	PE-PGRS family protein
Rv1452c	1638229	1636004	1076	1637154	A	G	GTC->V	GCC->A	non-synonymous	PE-PGRS family protein
Rv1452c	1638229	1636004	1065	1637165	A	C	CGT->R	CGG->R	synonymous	PE-PGRS family protein
Rv1452c	1638229	1636004	1064	1637166	C	A	CGT->R	CTT->L	non-synonymous	PE-PGRS family protein
Rv1452c	1638229	1636004	1058	1637172	A	T	TTT->F	TAT->Y	non-synonymous	PE-PGRS family protein
Rv1452c	1638229	1636004	1057	1637173	A	G	TTT->F	CTT->L	non-synonymous	PE-PGRS family protein
Rv1452c	1638229	1636004	1056	1637174	T	G	GGA->G	GGC->G	synonymous	PE-PGRS family protein
Rv1452c	1638229	1636004	1052	1637178	G	C	GCC->A	GGC->G	non-synonymous	PE-PGRS family protein
Rv1452c	1638229	1636004	1038	1637192	G	A	GGC->G	GGT->G	synonymous	PE-PGRS family protein
Rv1452c	1638229	1636004	1033	1637197	T	C	ACC->T	GCC->A	non-synonymous	PE-PGRS family protein
Rv1452c	1638229	1636004	1026	1637204	A	G	GTT->V	GTC->V	synonymous	PE-PGRS family protein
Rv1452c	1638229	1636004	1024	1637206	C	T	GTT->V	ATT->I	non-synonymous	PE-PGRS family protein
Rv1452c	1638229	1636004	1023	1637207	C	A	GGG->G	GGT->G	synonymous	PE-PGRS family protein
Rv1452c	1638229	1636004	1020	1637210	A	G	GGT->G	GGC->G	synonymous	PE-PGRS family protein
Rv1452c	1638229	1636004	1016	1637214	G	T	GCC->A	GAC->D	non-synonymous	PE-PGRS family protein
Rv1452c	1638229	1636004	1002	1637228	A	G	GGT->G	GGC->G	synonymous	PE-PGRS family protein
Rv1453	1638381	1639646	1214	1639594	C	A	CCA->P	CAA->Q	non-synonymous	transcriptional activator protein
Rv1458c	1644260	1643319	397	1643864	T	C	ACC->T	GCC->A	non-synonymous	unidentified antibiotic-transport ATP-binding protein ABC transporter
Rv1459c	1646138	1644363	337	1645802	T	C	AAA->K	GAA->E	non-synonymous	integral membrane protein
Rv1461	1646989	1649529	448	1647436	G	A	GTA->V	ATA->I	non-synonymous	hypothetical protein Rv1461
Rv1462	1649526	1650719	547	1650072	A	G	AAC->N	GAC->D	non-synonymous	hypothetical protein Rv1462
Rv1463	1650716	1651516	593	1651308	A	G	GAA->E	GGA->G	non-synonymous	ABC transporter ATP-binding protein
Rv1486c	1676883	1676017	594	1676290	C	A	AAG->K	AAT->N	non-synonymous	hypothetical protein Rv1486c
Rv1489	1678552	1678908	155	1678706	A	C	AAG->K	ACG->T	non-synonymous	hypothetical protein Rv1489
Rv1490	1679322	1680629	306	1679627	C	T	ACC->T	ACT->T	synonymous	hypothetical protein Rv1490
Rv1497	1687941	1689230	124	1688064	A	G	ATG->M	GTG->V	non-synonymous	esterase LipL
Rv1497	1687941	1689230	360	1688300	T	C	TTT->F	TTC->F	synonymous	esterase LipL
Rv1498c	1689920	1689303	572	1689349	C	T	CGC->R	CAC->H	non-synonymous	methyltransferase
Rv1500	1690850	1691878	944	1691793	T	G	CTG->L	CGG->R	non-synonymous	glycosyltransferase
Rv1501	1691890	1692711	252	1692141	A	C	ATA->I	ATC->I	synonymous	hypothetical protein Rv1501
Rv1502	1692924	1693823	638	1693561	A	G	TAC->Y	TGC->C	non-synonymous	hypothetical protein Rv1502
Rv1504c	1695144	1694545	108	1695037	G	A	TTC->F	TTT->F	synonymous	hypothetical protein Rv1504c
Rv1505c	1695946	1695281	151	1695796	C	T	GCC->A	ACC->T	non-synonymous	hypothetical protein Rv1505c
Rv1508c	1699894	1698095	984	1698911	G	A	GGC->G	GGT->G	synonymous	hypothetical protein Rv1508c
Rv1508c	1699894	1698095	46	1699849	G	A	CCG->P	TCG->S	non-synonymous	hypothetical protein Rv1508c
Rv1510	1701295	1702593	390	1701684	G	A	CTG->L	CTA->L	synonymous	hypothetical protein Rv1510
Rv1514c	1706595	1705807	477	1706119	T	C	TCA->S	TCG->S	synonymous	hypothetical protein Rv1514c
Rv1515c	1707526	1706630	842	1706685	C	A	GGA->G	GTA->V	non-synonymous	hypothetical protein Rv1515c
Rv1517	1708871	1709635	562	1709432	C	T	CTC->L	TTC->F	non-synonymous	hypothetical protein Rv1517
Rv1520	1711028	1712068	643	1711670	C	T	CGC->R	TGC->C	non-synonymous	sugar transferase
Rv1521	1712302	1714053	891	1713192	A	G	GTA->V	GTG->V	synonymous	acyl-CoA synthetase
Rv1522c	1717612	1714172	1141	1716472	A	G	TCC->S	CCC->P	non-synonymous	transmembrane transport protein MmpL12
Rv1527c	1728409	1722083	6210	1722200	C	G	GTG->V	GTC->V	synonymous	polyketide synthase PKS5
Rv1527c	1728409	1722083	6182	1722228	A	C	CTG->L	CGG->R	non-synonymous	polyketide synthase PKS5
Rv1532c	1733550	1733116	417	1733134	C	T	CAG->Q	CAA->Q	synonymous	hypothetical protein Rv1532c
Rv1532c	1733550	1733116	226	1733325	C	G	GCT->A	CCT->P	non-synonymous	hypothetical protein Rv1532c
Rv1538c	1742192	1741212	841	1741352	C	T	GGC->G	AGC->S	non-synonymous	L-aparaginase ansA
Rv1548c	1753333	1751297	773	1752561	T	C	GAC->D	GGC->G	non-synonymous	PPE family protein
Rv1552	1757681	1759432	1572	1759252	G	T	TCG->S	TCT->S	synonymous	fumarate reductase flavoprotein subunit
Rv1553	1759435	1760178	366	1759800	G	A	CGG->R	CGA->R	synonymous	fumarate reductase iron-sulfur subunit FrdB
Rv1554	1760175	1760555	118	1760292	A	G	ATG->M	GTG->V	non-synonymous	fumarate reductase subunit C
Rv1564c	1771601	1769436	657	1770945	C	T	GAG->E	GAA->E	synonymous	maltooligosyltrehalose synthase TreX
Rv1570	1777859	1778539	572	1778430	T	C	ATG->M	ACG->T	non-synonymous	dithiobiotin synthetase
Rv1587c	1789163	1788162	594	1788570	G	T	AAC->N	AAA->K	non-synonymous	REP13E12 repeat-containing protein
Rv1587c	1789163	1788162	590	1788574	T	C	CAC->H	CGC->R	non-synonymous	REP13E12 repeat-containing protein
Rv1587c	1789163	1788162	551	1788613	C	T	GGC->G	GAC->D	non-synonymous	REP13E12 repeat-containing protein
Rv1587c	1789163	1788162	537	1788627	C	G	CTG->L	CTC->L	synonymous	REP13E12 repeat-containing protein
Rv1587c	1789163	1788162	534	1788630	C	G	GAG->E	GAC->D	non-synonymous	REP13E12 repeat-containing protein
Rv1588c	1789836	1789168	391	1789446	C	T	GTC->V	ATC->I	non-synonymous	REP13E12 repeat-containing protein
Rv1588c	1789836	1789168	321	1789516	A	G	GGT->G	GGC->G	synonymous	REP13E12 repeat-containing protein
Rv1588c	1789836	1789168	273	1789564	C	T	CGG->R	CGA->R	synonymous	REP13E12 repeat-containing protein
Rv1588c	1789836	1789168	272	1789565	C	A	CGG->R	CTG->L	non-synonymous	REP13E12 repeat-containing protein
Rv1588c	1789836	1789168	187	1789650	C	T	GCC->A	ACC->T	non-synonymous	REP13E12 repeat-containing protein
Rv1588c	1789836	1789168	183	1789654	A	G	CTT->L	CTC->L	synonymous	REP13E12 repeat-containing protein
Rv1588c	1789836	1789168	166	1789671	C	T	GCG->A	ACG->T	non-synonymous	REP13E12 repeat-containing protein
Rv1588c	1789836	1789168	162	1789675	A	C	GGT->G	GGG->G	synonymous	REP13E12 repeat-containing protein
Rv1588c	1789836	1789168	159	1789678	C	G	GTG->V	GTC->V	synonymous	REP13E12 repeat-containing protein
Rv1592c	1793740	1792400	964	1792777	T	C	ATT->I	GTT->V	non-synonymous	hypothetical protein Rv1592c
Rv1592c	1793740	1792400	963	1792778	T	C	GAA->E	GAG->E	synonymous	hypothetical protein Rv1592c
Rv1597	1798294	1799052	62	1798355	G	A	GGT->G	GAT->D	non-synonymous	hypothetical protein Rv1597
Rv1602	1802664	1803284	602	1803265	G	A	AGC->S	AAC->N	non-synonymous	imidazole glycerol phosphate synthase subunit HisH
Rv1604	1804039	1804851	371	1804409	C	A	CCA->P	CAA->Q	non-synonymous	inositol-monophosphatase
Rv1612	1811127	1812359	249	1811375	G	T	GGG->G	GGT->G	synonymous	tryptophan synthase subunit beta
Rv1617	1816189	1817607	982	1817170	C	T	CGC->R	TGC->C	non-synonymous	pyruvate kinase
Rv1618	1817615	1818517	362	1817976	A	T	CAC->H	CTC->L	non-synonymous	acyl-CoA thioesterase II TesB1
Rv1618	1817615	1818517	566	1818180	T	C	CTA->L	CCA->P	non-synonymous	acyl-CoA thioesterase II TesB1
Rv1629	1830665	1833379	556	1831220	A	C	ACC->T	CCC->P	non-synonymous	DNA polymerase I
Rv1629	1830665	1833379	562	1831226	A	G	AGG->R	GGG->G	non-synonymous	DNA polymerase I
Rv1629	1830665	1833379	624	1831288	C	T	CCC->P	CCT->P	synonymous	DNA polymerase I
Rv1630	1833542	1834987	636	1834177	A	C	CGA->R	CGC->R	synonymous	30S ribosomal protein S1
Rv1634	1839168	1840583	592	1839759	G	C	GGG->G	CGG->R	non-synonymous	drug efflux membrane protein
Rv1638	1843741	1846659	599	1844339	A	G	GAC->D	GGC->G	non-synonymous	excinuclease ABC subunit A
Rv1639c	1848458	1846989	540	1847919	C	G	ACG->T	ACC->T	synonymous	hypothetical protein Rv1639c
Rv1640c	1852035	1848517	2985	1849051	C	T	CCG->P	CCA->P	synonymous	lysyl-tRNA synthetase
Rv1640c	1852035	1848517	2427	1849609	T	C	CGA->R	CGG->R	synonymous	lysyl-tRNA synthetase
Rv1640c	1852035	1848517	2102	1849934	A	G	ATT->I	ACT->T	non-synonymous	lysyl-tRNA synthetase
Rv1644	1853606	1854388	695	1854300	T	C	CTG->L	CCG->P	non-synonymous	23S rRNA methyltransferase TsnR
Rv1647	1856774	1857724	4	1856777	G	C	GCG->A	CCG->P	non-synonymous	hypothetical protein Rv1647
Rv1649	1858733	1859758	827	1859559	C	A	GCC->A	GAC->D	non-synonymous	phenylalanyl-tRNA synthetase subunit alpha
Rv1661	1875304	1881684	2441	1877744	A	C	GAA->E	GCA->A	non-synonymous	polyketide synthase pks7
Rv1662	1881704	1886512	3682	1885385	T	G	TTG->L	GTG->V	non-synonymous	polyketide synthase pks8
Rv1662	1881704	1886512	4069	1885772	G	A	GCC->A	ACC->T	non-synonymous	polyketide synthase pks8
Rv1664	1888026	1891079	348	1888373	T	C	GCT->A	GCC->A	synonymous	polyketide synthase pks9
Rv1665	1891226	1892287	163	1891388	C	G	CCG->P	GCG->A	non-synonymous	chalcone synthase
Rv1665	1891226	1892287	792	1892017	T	C	CAT->H	CAC->H	synonymous	chalcone synthase
Rv1668c	1895342	1894224	921	1894422	A	G	GAT->D	GAC->D	synonymous	macrolide-transport ATP-binding protein ABC transporter
Rv1676	1901047	1901751	447	1901493	T	C	AGT->S	AGC->S	synonymous	hypothetical protein Rv1676
Rv1677	1901748	1902296	69	1901816	A	G	CAA->Q	CAG->Q	synonymous	lipoprotein DsbF
Rv1681	1905250	1906242	829	1906078	A	G	ACC->T	GCC->A	non-synonymous	molybdopterin biosynthesis protein MoeX
Rv1682	1906403	1907320	894	1907296	G	C	GCG->A	GCC->A	synonymous	coiled-coil structural protein
Rv1691	1915949	1916701	189	1916137	A	G	CTA->L	CTG->L	synonymous	hypothetical protein Rv1691
Rv1694	1917940	1918746	33	1917972	A	G	CTA->L	CTG->L	synonymous	cytotoxin/hemolysin TlyA
Rv1699	1923829	1925589	180	1924008	G	A	CCG->P	CCA->P	synonymous	CTP synthetase
Rv1704c	1931456	1929786	278	1931179	C	A	CGG->R	CTG->L	non-synonymous	D-serine/alanine/glycine transporter protein CycA
Rv1705c	1932654	1931497	937	1931718	G	C	CTG->L	GTG->V	non-synonymous	PPE family protein
Rv1716	1943576	1944406	532	1944107	A	G	AGT->S	GGT->G	non-synonymous	hypothetical protein Rv1716
Rv1716	1943576	1944406	827	1944402	T	C	GTC->V	GCC->A	non-synonymous	hypothetical protein Rv1716
Rv1717	1944406	1944756	63	1944468	C	G	TCC->S	TCG->S	synonymous	hypothetical protein Rv1717
Rv1720c	1947419	1947030	138	1947282	A	G	CGT->R	CGC->R	synonymous	hypothetical protein Rv1720c
Rv1724c	1951051	1950632	285	1950767	T	C	AAA->K	AAG->K	synonymous	hypothetical protein Rv1724c
Rv1730c	1957245	1955692	1332	1955914	C	T	CGG->R	CGA->R	synonymous	penicillin-binding protein
Rv1730c	1957245	1955692	1305	1955941	G	C	GAC->D	GAG->E	non-synonymous	penicillin-binding protein
Rv1733c	1960487	1959855	204	1960284	C	A	CAG->Q	CAT->H	non-synonymous	transmembrane protein
Rv1735c	1961788	1961291	54	1961735	A	G	GCT->A	GCC->A	synonymous	hypothetical protein Rv1735c
Rv1739c	1967637	1965955	612	1967026	C	T	GCG->A	GCA->A	synonymous	sulphate-transport transmembrane protein ABC transporter
Rv1739c	1967637	1965955	401	1967237	C	A	CGA->R	CTA->L	non-synonymous	sulphate-transport transmembrane protein ABC transporter
Rv1739c	1967637	1965955	95	1967543	C	A	GGC->G	GTC->V	non-synonymous	sulphate-transport transmembrane protein ABC transporter
Rv1745c	1971991	1971380	267	1971725	G	C	CGC->R	CGG->R	synonymous	isopentenyl-diphosphate delta-isomerase
Rv1751	1979621	1981003	1032	1980652	G	T	CCG->P	CCT->P	synonymous	hypothetical protein Rv1751
Rv1753c	1984775	1981614	2748	1982028	G	C	CTC->L	CTG->L	synonymous	PPE family protein
Rv1753c	1984775	1981614	1581	1983195	A	G	GGT->G	GGC->G	synonymous	PPE family protein
Rv1753c	1984775	1981614	1578	1983198	C	G	GTG->V	GTC->V	synonymous	PPE family protein
Rv1753c	1984775	1981614	1541	1983235	T	G	AAC->N	ACC->T	non-synonymous	PPE family protein
Rv1753c	1984775	1981614	1537	1983239	A	G	TTG->L	CTG->L	synonymous	PPE family protein
Rv1753c	1984775	1981614	1485	1983291	C	T	CCG->P	CCA->P	synonymous	PPE family protein
Rv1753c	1984775	1981614	1463	1983313	T	G	AAC->N	ACC->T	non-synonymous	PPE family protein
Rv1769	2002626	2003870	480	2003105	C	T	TTC->F	TTT->F	synonymous	hypothetical protein Rv1769
Rv1769	2002626	2003870	1202	2003827	A	C	GAC->D	GCC->A	non-synonymous	hypothetical protein Rv1769
Rv1770	2003878	2005164	362	2004239	C	T	GCC->A	GTC->V	non-synonymous	hypothetical protein Rv1770
Rv1783	2019257	2020564	1307	2020563	A	T	TAG->*	TTG->L	non-synonymous	hypothetical protein Rv1783
Rv1784	2020634	2023432	2235	2022868	T	C	AGT->S	AGC->S	synonymous	hypothetical protein Rv1784
Rv1785c	2024628	2023447	1001	2023628	C	G	GGA->G	GCA->A	non-synonymous	cytochrome P450 143
Rv1796	2033729	2035486	342	2034070	A	C	CCA->P	CCC->P	synonymous	proline rich membrane-anchored mycosin MYCP5 (serine protease) (subtilisin-like protease) (subtilase-like) (mycosin-5)
Rv1802	2043384	2044775	512	2043895	C	T	CCG->P	CTG->L	non-synonymous	PPE family protein
Rv1803c	2046842	2044923	1533	2045310	A	G	ATT->I	ATC->I	synonymous	PE-PGRS family protein
Rv1807	2048398	2049597	668	2049065	T	C	TTC->F	TCC->S	non-synonymous	PPE family protein
Rv1807	2048398	2049597	700	2049097	G	C	GTC->V	CTC->L	non-synonymous	PPE family protein
Rv1808	2049921	2051150	902	2050822	G	C	GGA->G	GCA->A	non-synonymous	PPE family protein
Rv1808	2049921	2051150	993	2050913	A	G	GAA->E	GAG->E	synonymous	PPE family protein
Rv1809	2051282	2052688	465	2051746	T	C	GCT->A	GCC->A	synonymous	PPE family protein
Rv1809	2051282	2052688	754	2052035	G	T	GTG->V	TTG->L	non-synonymous	PPE family protein
Rv1812c	2055359	2054157	89	2055271	A	G	CTA->L	CCA->P	non-synonymous	dehydrogenase
Rv1815	2057528	2058193	247	2057774	A	T	ATC->I	TTC->F	non-synonymous	hypothetical protein Rv1815
Rv1818c	2062674	2061178	717	2061958	A	G	GCT->A	GCC->A	synonymous	PE-PGRS family protein
Rv1821	2066457	2068883	1228	2067684	G	A	GTG->V	ATG->M	non-synonymous	preprotein translocase subunit SecA
Rv1823	2069702	2070625	70	2069771	C	A	CAG->Q	AAG->K	non-synonymous	hypothetical protein Rv1823
Rv1826	2071952	2072356	362	2072313	C	A	ACA->T	AAA->K	non-synonymous	glycine cleavage system protein H
Rv1832	2075877	2078702	2370	2078246	C	G	GGC->G	GGG->G	synonymous	glycine dehydrogenase
Rv1835c	2082587	2080701	535	2082053	A	G	TGC->C	CGC->R	non-synonymous	hypothetical protein Rv1835c
Rv1837c	2086981	2084756	310	2086672	C	T	GGT->G	AGT->S	non-synonymous	malate synthase G
Rv1840c	2089518	2087971	1467	2088052	C	T	GGG->G	GGA->G	synonymous	PE-PGRS family protein
Rv1846c	2096599	2096183	414	2096186	A	G	ACT->T	ACC->T	synonymous	transcriptional regulatory protein
Rv1847	2096877	2097299	394	2097270	C	T	CGG->R	TGG->W	non-synonymous	hypothetical protein Rv1847
Rv1860	2107736	2108713	406	2108141	T	C	TTC->F	CTC->L	non-synonymous	hypothetical protein Rv1860
Rv1865c	2112966	2112106	135	2112832	A	C	GCT->A	GCG->A	synonymous	short chain dehydrogenase
Rv1867	2115764	2117248	1140	2116903	C	T	GGC->G	GGT->G	synonymous	acetyl-CoA acetyltransferase
Rv1872c	2123151	2121907	757	2122395	C	T	GTG->V	ATG->M	non-synonymous	L-lactate dehydrogenase (cytochrome) LldD2
Rv1872c	2123151	2121907	176	2122976	C	G	GGT->G	GCT->A	non-synonymous	L-lactate dehydrogenase (cytochrome) LldD2
Rv1878	2128022	2129374	849	2128870	A	G	CTA->L	CTG->L	synonymous	glutamine synthetase
Rv1886c	2135867	2134890	714	2135154	G	T	CCC->P	CCA->P	synonymous	secreted antigen 85-B fbpB (85B) (antigen 85 complex B) (Mycolyl transferase 85B) (fibronectin-binding protein B) (extracellular alpha-antigen)
Rv1888A	2138617	2138444	165	2138453	C	T	GGG->G	GGA->G	synonymous	hypothetical protein Rv1888A
Rv1895	2142521	2143675	808	2143328	G	C	GTG->V	CTG->L	non-synonymous	dehydrogenase
Rv1900c	2147633	2146245	612	2147022	A	C	ATT->I	ATG->M	non-synonymous	lignin peroxidase LIPJ
Rv1904	2150954	2151385	269	2151222	T	G	TTG->L	TGG->W	non-synonymous	hypothetical protein Rv1904
Rv1908c	2156111	2153889	1388	2154724	C	A	CGG->R	CTG->L	non-synonymous	catalase-peroxidase-peroxynitritase T KATG
Rv1908c	2156111	2153889	1217	2154895	T	C	GAC->D	GGC->G	non-synonymous	catalase-peroxidase-peroxynitritase T KATG
Rv1908c	2156111	2153889	949	2155163	T	C	ATC->I	GTC->V	non-synonymous	catalase-peroxidase-peroxynitritase T KATG
Rv1908c	2156111	2153889	944	2155168	C	T	AGC->S	AAC->N	non-synonymous	catalase-peroxidase-peroxynitritase T KATG
Rv1912c	2159091	2158087	983	2158109	T	C	GAC->D	GGC->G	non-synonymous	oxidoreductase FADB5
Rv1915	2160463	2161566	536	2160998	G	A	GGC->G	GAC->D	non-synonymous	isocitrate lyase
Rv1916	2161566	2162762	337	2161902	G	A	GAC->D	AAC->N	non-synonymous	isocitrate lyase
Rv1917c	2167311	2162932	3522	2163790	A	C	CCT->P	CCG->P	synonymous	PPE family protein
Rv1917c	2167311	2162932	2026	2165286	A	C	TCA->S	GCA->A	non-synonymous	PPE family protein
Rv1918c	2170612	2167649	2687	2167926	A	G	TTG->L	TCG->S	non-synonymous	PPE family protein
Rv1918c	2170612	2167649	1880	2168733	G	C	ACT->T	AGT->S	non-synonymous	PPE family protein
Rv1920	2171623	2172486	758	2172380	A	C	GAG->E	GCG->A	non-synonymous	hypothetical protein Rv1920
Rv1925	2177087	2178949	280	2177366	C	T	CGC->R	TGC->C	non-synonymous	acyl-CoA synthetase
Rv1925	2177087	2178949	568	2177654	A	C	ATG->M	CTG->L	non-synonymous	acyl-CoA synthetase
Rv1927	2179673	2180446	153	2179825	G	C	GAG->E	GAC->D	non-synonymous	hypothetical protein Rv1927
Rv1934c	2186188	2184959	515	2185674	A	G	ATC->I	ACC->T	non-synonymous	acyl-CoA dehydrogenase FADE17
Rv1936	2187384	2188493	204	2187587	G	C	CAG->Q	CAC->H	non-synonymous	monooxygenase
Rv1938	2191027	2192097	472	2191498	G	T	GGG->G	TGG->W	non-synonymous	epoxide hydrolase EphB
Rv1948c	2199064	2198714	13	2199052	C	G	GGT->G	CGT->R	non-synonymous	hypothetical protein Rv1948c
Rv1956	2202138	2202587	363	2202500	C	T	CAC->H	CAT->H	synonymous	transcriptional regulatory protein
Rv1966	2209327	2210604	139	2209465	G	A	GCG->A	ACG->T	non-synonymous	MCE-family protein MCE3A
Rv1968	2211626	2212858	201	2211826	A	G	AAA->K	AAG->K	synonymous	MCE-family protein MCE3C
Rv1971	2215257	2216570	1187	2216443	C	A	GCG->A	GAG->E	non-synonymous	MCE-family protein MCE3F
Rv1972	2216592	2217167	372	2216963	C	G	CAC->H	CAG->Q	non-synonymous	mce associated membrane protein
Rv1977	2219754	2220800	759	2220512	T	G	TCT->S	TCG->S	synonymous	hypothetical protein Rv1977
Rv1978	2220908	2221756	677	2221584	G	C	AGT->S	ACT->T	non-synonymous	hypothetical protein Rv1978
Rv1979c	2223164	2221719	1369	2221796	C	T	GTC->V	ATC->I	non-synonymous	permease
Rv1985c	2229902	2228991	102	2229801	C	G	CCG->P	CCC->P	synonymous	chromosome replication initiation inhibitor protein
Rv1986	2230011	2230610	35	2230045	G	A	TGC->C	TAC->Y	non-synonymous	integral membrane protein
Rv1992c	2237306	2234991	2220	2235087	G	A	TTC->F	TTT->F	synonymous	metal cation transporter P-type ATPase G CtpG
Rv1999c	2245138	2243816	718	2244421	G	T	CTG->L	ATG->M	non-synonymous	integral membrane protein
Rv2000	2245209	2246822	656	2245864	C	A	CCG->P	CAG->Q	non-synonymous	hypothetical protein Rv2000
Rv2002	2247660	2248442	18	2247677	A	C	ATA->I	ATC->I	synonymous	20-beta-hydroxysteroid dehydrogenase
Rv2005c	2251883	2250996	279	2251605	G	A	AGC->S	AGT->S	synonymous	hypothetical protein Rv2005c
Rv2015c	2263072	2261816	453	2262620	T	A	GAA->E	GAT->D	non-synonymous	hypothetical protein Rv2015c
Rv2015c	2263072	2261816	394	2262679	G	A	CTG->L	TTG->L	synonymous	hypothetical protein Rv2015c
Rv2015c	2263072	2261816	375	2262698	G	C	GGC->G	GGG->G	synonymous	hypothetical protein Rv2015c
Rv2015c	2263072	2261816	216	2262857	T	C	TCA->S	TCG->S	synonymous	hypothetical protein Rv2015c
Rv2017	2263998	2265038	785	2264782	C	A	GCG->A	GAG->E	non-synonymous	transcriptional regulatory protein
Rv2021c	2267110	2266805	96	2267015	T	C	GCA->A	GCG->A	synonymous	transcriptional regulatory protein
Rv2024c	2270240	2268693	696	2269545	G	A	AGC->S	AGT->S	synonymous	hypothetical protein Rv2024c
Rv2024c	2270240	2268693	461	2269780	T	C	GAC->D	GGC->G	non-synonymous	hypothetical protein Rv2024c
Rv2024c	2270240	2268693	139	2270102	A	G	TGG->W	CGG->R	non-synonymous	hypothetical protein Rv2024c
Rv2037c	2283721	2282747	935	2282787	C	T	TGT->C	TAT->Y	non-synonymous	transmembrane protein
Rv2037c	2283721	2282747	531	2283191	G	C	GCC->A	GCG->A	synonymous	transmembrane protein
Rv2039c	2285641	2284799	391	2285251	C	A	GTC->V	TTC->F	non-synonymous	sugar-transport integral membrane protein ABC transporter
Rv2041c	2287846	2286527	726	2287121	A	G	GAT->D	GAC->D	synonymous	sugar-binding lipoprotein
Rv2042c	2288681	2287884	597	2288085	G	C	GCC->A	GCG->A	synonymous	hypothetical protein Rv2042c
Rv2047c	2294526	2291962	520	2294007	T	C	ACG->T	GCG->A	non-synonymous	hypothetical protein Rv2047c
Rv2048c	2306986	2294531	11302	2295685	C	A	GTG->V	TTG->L	non-synonymous	polyketide synthase pks12
Rv2048c	2306986	2294531	10945	2296042	G	C	CCG->P	GCG->A	non-synonymous	polyketide synthase pks12
Rv2048c	2306986	2294531	10806	2296181	A	G	GGT->G	GGC->G	synonymous	polyketide synthase pks12
Rv2048c	2306986	2294531	9011	2297976	G	A	TCA->S	TTA->L	non-synonymous	polyketide synthase pks12
Rv2048c	2306986	2294531	8793	2298194	G	T	GCC->A	GCA->A	synonymous	polyketide synthase pks12
Rv2048c	2306986	2294531	6750	2300237	A	G	GCT->A	GCC->A	synonymous	polyketide synthase pks12
Rv2048c	2306986	2294531	6441	2300546	A	T	CAT->H	CAA->Q	non-synonymous	polyketide synthase pks12
Rv2048c	2306986	2294531	6435	2300552	T	G	CCA->P	CCC->P	synonymous	polyketide synthase pks12
Rv2048c	2306986	2294531	6432	2300555	A	G	GAT->D	GAC->D	synonymous	polyketide synthase pks12
Rv2048c	2306986	2294531	4954	2302033	G	A	CGC->R	TGC->C	non-synonymous	polyketide synthase pks12
Rv2052c	2312517	2310913	1419	2311099	C	G	CCG->P	CCC->P	synonymous	hypothetical protein Rv2052c
Rv2057c	2314825	2314661	137	2314689	C	A	CGT->R	CTT->L	non-synonymous	50S ribosomal protein L33
Rv2059	2315174	2316709	213	2315386	C	A	CAC->H	CAA->Q	non-synonymous	hypothetical protein Rv2059
Rv2059	2315174	2316709	950	2316123	C	A	ACA->T	AAA->K	non-synonymous	hypothetical protein Rv2059
Rv2062c	2320753	2317169	2029	2318725	C	T	GAA->E	AAA->K	non-synonymous	cobaltochelatase subunit CobN
Rv2062c	2320753	2317169	434	2320320	C	T	CGT->R	CAT->H	non-synonymous	cobaltochelatase subunit CobN
Rv2064	2321451	2322542	525	2321975	T	C	GAT->D	GAC->D	synonymous	cobalamin biosynthesis protein CobG
Rv2071c	2328977	2328222	435	2328543	T	C	ATA->I	ATG->M	non-synonymous	precorrin-4 C11-methyltransferase CobM
Rv2072c	2330146	2328974	614	2329533	A	G	CTC->L	CCC->P	non-synonymous	precorrin-6y methyltransferase CobL
Rv2075c	2332879	2331416	1260	2331620	A	C	GGT->G	GGG->G	synonymous	hypothetical protein Rv2075c
Rv2075c	2332879	2331416	1091	2331789	G	T	CCG->P	CAG->Q	non-synonymous	hypothetical protein Rv2075c
Rv2077c	2334294	2333323	288	2334007	A	G	GCT->A	GCC->A	synonymous	transmembrane protein
Rv2078	2335059	2335373	17	2335075	A	G	GAA->E	GGA->G	non-synonymous	hypothetical protein Rv2078
Rv2079	2335355	2337325	140	2335494	A	G	TAC->Y	TGC->C	non-synonymous	hypothetical protein Rv2079
Rv2079	2335355	2337325	771	2336125	T	G	AAT->N	AAG->K	non-synonymous	hypothetical protein Rv2079
Rv2079	2335355	2337325	775	2336129	A	G	AAC->N	GAC->D	non-synonymous	hypothetical protein Rv2079
Rv2079	2335355	2337325	776	2336130	A	G	AAC->N	AGC->S	non-synonymous	hypothetical protein Rv2079
Rv2079	2335355	2337325	1825	2337179	C	T	CAA->Q	TAA->*	non-synonymous	hypothetical protein Rv2079
Rv2082	2338709	2340874	102	2338810	T	C	CGT->R	CGC->R	synonymous	hypothetical protein Rv2082
Rv2082	2338709	2340874	103	2338811	A	G	AAG->K	GAG->E	non-synonymous	hypothetical protein Rv2082
Rv2082	2338709	2340874	547	2339255	A	G	ACT->T	GCT->A	non-synonymous	hypothetical protein Rv2082
Rv2082	2338709	2340874	1127	2339835	C	T	CCC->P	CTC->L	non-synonymous	hypothetical protein Rv2082
Rv2082	2338709	2340874	1913	2340621	C	G	CCC->P	CGC->R	non-synonymous	hypothetical protein Rv2082
Rv2083	2340871	2341815	766	2341636	C	G	CTG->L	GTG->V	non-synonymous	hypothetical protein Rv2083
Rv2088	2344411	2346180	89	2344499	T	G	CTG->L	CGG->R	non-synonymous	transmembrane serine/threonine-protein kinase J
Rv2088	2344411	2346180	627	2345037	C	A	CTC->L	CTA->L	synonymous	transmembrane serine/threonine-protein kinase J
Rv2089c	2347324	2346197	1007	2346318	G	A	CCG->P	CTG->L	non-synonymous	dipeptidase PepE
Rv2090	2347373	2348554	460	2347832	C	A	CGG->R	AGG->R	synonymous	5'-3' exonuclease
Rv2090	2347373	2348554	1074	2348446	C	G	TTC->F	TTG->L	non-synonymous	5'-3' exonuclease
Rv2096c	2355310	2354312	520	2354791	A	G	TCG->S	CCG->P	non-synonymous	hypothetical protein Rv2096c
Rv2101	2360240	2363281	1365	2361604	C	G	GTC->V	GTG->V	synonymous	helicase HelZ
Rv2101	2360240	2363281	1384	2361623	A	C	ATG->M	CTG->L	non-synonymous	helicase HelZ
Rv2101	2360240	2363281	1802	2362041	C	A	CCG->P	CAG->Q	non-synonymous	helicase HelZ
Rv2103c	2364520	2364086	46	2364475	T	C	ACA->T	GCA->A	non-synonymous	hypothetical protein Rv2103c
Rv2109c	2369729	2368983	544	2369186	G	C	CGT->R	GGT->G	non-synonymous	proteasome (alpha subunit) PrcA
Rv2109c	2369729	2368983	404	2369326	C	G	CGC->R	CCC->P	non-synonymous	proteasome (alpha subunit) PrcA
Rv2125	2386293	2387171	97	2386389	G	A	GGC->G	AGC->S	non-synonymous	hypothetical protein Rv2125
Rv2126c	2387972	2387202	240	2387733	T	C	GAA->E	GAG->E	synonymous	PE-PGRS family protein
Rv2127	2388616	2390085	26	2388641	G	A	GGC->G	GAC->D	non-synonymous	L-asparagine permease ansP1
Rv2139	2398720	2399793	1015	2399734	G	A	GGC->G	AGC->S	non-synonymous	dihydroorotate dehydrogenase 2
Rv2148c	2407616	2406840	506	2407111	G	A	CCC->P	CTC->L	non-synonymous	hypothetical protein Rv2148c
Rv2151c	2410641	2409697	904	2409738	T	C	ACG->T	GCG->A	non-synonymous	cell division protein FtsQ
Rv2152c	2412122	2410638	627	2411496	G	A	TTC->F	TTT->F	synonymous	UDP-N-acetylmuramate--L-alanine ligase
Rv2153c	2413351	2412119	106	2413246	C	A	GTG->V	TTG->L	non-synonymous	undecaprenyldiphospho-muramoylpentapeptide beta-N- acetylglucosaminyltransferase
Rv2155c	2416394	2414934	739	2415656	G	C	CGG->R	GGG->G	non-synonymous	UDP-N-acetylmuramoyl-L-alanyl-D-glutamate synthetase
Rv2160A	2422278	2421643	463	2421816	A	G	TGC->C	CGC->R	non-synonymous	hypothetical protein Rv2160A
Rv2160c	2422003	2421662	188	2421816	A	G	GTG->V	GCG->A	non-synonymous	hypothetical protein Rv2160c
Rv2162c	2424838	2423240	1020	2423819	C	G	GGG->G	GGC->G	synonymous	PE-PGRS family protein
Rv2162c	2424838	2423240	1017	2423822	A	G	GGT->G	GGC->G	synonymous	PE-PGRS family protein
Rv2163c	2427087	2425048	1617	2425471	T	C	CGA->R	CGG->R	synonymous	penicillin-binding membrane protein pbpB
Rv2165c	2429269	2428235	753	2428517	A	G	GCT->A	GCC->A	synonymous	S-adenosyl-methyltransferase MraW
Rv2178c	2441720	2440332	795	2440926	G	T	GAC->D	GAA->E	non-synonymous	3-deoxy-D-arabino-heptulosonate 7-phosphate synthase AroG
Rv2180c	2443214	2442327	747	2442468	C	T	TGG->W	TGA->*	non-synonymous	integral membrane protein
Rv2187	2448160	2449962	299	2448458	C	T	ACC->T	ATC->I	non-synonymous	long-chain-fatty-acid-CoA ligase fadD15 (fatty-acid-CoA synthetase) (fatty-acid-CoA synthase)
Rv2189c	2452020	2451247	321	2451700	A	C	GCT->A	GCG->A	synonymous	hypothetical protein Rv2189c
Rv2198c	2463047	2462148	177	2462871	G	A	GCC->A	GCT->A	synonymous	membrane protein
Rv2205c	2470463	2469387	315	2470149	T	C	GAA->E	GAG->E	synonymous	hypothetical protein Rv2205c
Rv2209	2473400	2474938	1287	2474686	C	T	CGC->R	CGT->R	synonymous	integral membrane protein
Rv2221c	2492353	2489369	757	2491597	G	T	CGG->R	AGG->R	synonymous	glutamate-ammonia-ligase adenylyltransferase GLNE (glutamine-synthetase adenylyltransferase)
Rv2226	2498832	2500373	895	2499726	G	A	GAT->D	AAT->N	non-synonymous	hypothetical protein Rv2226
Rv2231c	2505699	2504605	615	2505085	G	A	GCC->A	GCT->A	synonymous	hypothetical protein Rv2231c
Rv2236c	2509375	2508434	236	2509140	G	C	TCC->S	TGC->C	non-synonymous	cobalamin biosynthesis protein
Rv2237	2509489	2510256	234	2509722	A	G	CCA->P	CCG->P	synonymous	hypothetical protein Rv2237
Rv2247	2520743	2522164	600	2521342	T	C	GAT->D	GAC->D	synonymous	acetyl/propionyl-CoA carboxylase beta subunit AccD6
Rv2247	2520743	2522164	686	2521428	A	G	GAC->D	GGC->G	non-synonymous	acetyl/propionyl-CoA carboxylase beta subunit AccD6
Rv2248	2522360	2523175	596	2522955	T	G	GTC->V	GGC->G	non-synonymous	hypothetical protein Rv2248
Rv2251	2525565	2526992	1410	2526974	T	C	CCT->P	CCC->P	synonymous	flavoprotein
Rv2256c	2529874	2529341	195	2529680	A	G	ACT->T	ACC->T	synonymous	hypothetical protein Rv2256c
Rv2258c	2531897	2530836	156	2531742	A	G	GCT->A	GCC->A	synonymous	transcriptional regulator
Rv2260	2533330	2533965	48	2533377	T	C	GAT->D	GAC->D	synonymous	hypothetical protein Rv2260
Rv2260	2533330	2533965	440	2533769	G	A	AGC->S	AAC->N	non-synonymous	hypothetical protein Rv2260
Rv2264c	2538350	2536572	1752	2536599	C	T	GGG->G	GGA->G	synonymous	hypothetical protein Rv2264c
Rv2264c	2538350	2536572	1459	2536892	T	C	ACC->T	GCC->A	non-synonymous	hypothetical protein Rv2264c
Rv2268c	2544276	2542807	882	2543395	T	C	GAA->E	GAG->E	synonymous	cytochrome P450 128
Rv2274c	2546805	2546488	122	2546684	C	A	GGT->G	GTT->V	non-synonymous	hypothetical protein Rv2274c
Rv2276	2547749	2548939	952	2548700	C	T	CAC->H	TAC->Y	non-synonymous	cytochrome P450 121 CYP121
Rv2280	2551560	2552939	17	2551576	C	G	GCT->A	GGT->G	non-synonymous	dehydrogenase
Rv2280	2551560	2552939	18	2551577	T	C	GCT->A	GCC->A	synonymous	dehydrogenase
Rv2290	2562599	2563114	46	2562644	G	T	GCG->A	TCG->S	non-synonymous	lipoprotein lppO
Rv2307c	2578696	2577851	71	2578626	A	G	ATG->M	ACG->T	non-synonymous	hypothetical protein Rv2307c
Rv2308	2580419	2581135	634	2581052	G	A	GAC->D	AAC->N	non-synonymous	hypothetical protein Rv2308
Rv2314c	2587290	2585917	1215	2586076	C	G	CGG->R	CGC->R	synonymous	hypothetical protein Rv2314c
Rv2314c	2587290	2585917	1164	2586127	A	G	GGT->G	GGC->G	synonymous	hypothetical protein Rv2314c
Rv2316	2588838	2589710	199	2589036	G	C	GAC->D	CAC->H	non-synonymous	sugar-transport integral membrane protein ABC transporter UspA
Rv2316	2588838	2589710	379	2589216	G	C	GTG->V	CTG->L	non-synonymous	sugar-transport integral membrane protein ABC transporter UspA
Rv2318	2590518	2591840	967	2591484	G	A	GGT->G	AGT->S	non-synonymous	periplasmic sugar-binding lipoprotein UspC
Rv2319c	2592726	2591848	417	2592310	G	A	ATC->I	ATT->I	synonymous	hypothetical protein Rv2319c
Rv2326c	2599947	2597854	1548	2598400	A	G	AAT->N	AAC->N	synonymous	transmembrane ATP-binding protein ABC transorter
Rv2327	2599988	2600479	273	2600260	A	G	CGA->R	CGG->R	synonymous	hypothetical protein Rv2327
Rv2328	2600731	2601879	846	2601576	T	G	AGT->S	AGG->R	non-synonymous	PE family protein
Rv2328	2600731	2601879	1030	2601760	G	A	GCC->A	ACC->T	non-synonymous	PE family protein
Rv2333c	2608321	2606708	205	2608117	C	A	GAC->D	TAC->Y	non-synonymous	integral membrane transport protein
Rv2337c	2612987	2611869	732	2612256	G	T	CTC->L	CTA->L	synonymous	hypothetical protein Rv2337c
Rv2337c	2612987	2611869	356	2612632	C	A	GGC->G	GTC->V	non-synonymous	hypothetical protein Rv2337c
Rv2346c	2626172	2625888	249	2625924	T	C	GCA->A	GCG->A	synonymous	putative ESAT-6 like protein ESXO (ESAT-6 like protein 6)
Rv2346c	2626172	2625888	169	2626004	G	A	CTG->L	TTG->L	synonymous	putative ESAT-6 like protein ESXO (ESAT-6 like protein 6)
Rv2346c	2626172	2625888	162	2626011	G	A	ATC->I	ATT->I	synonymous	putative ESAT-6 like protein ESXO (ESAT-6 like protein 6)
Rv2346c	2626172	2625888	155	2626018	T	C	GAG->E	GGG->G	non-synonymous	putative ESAT-6 like protein ESXO (ESAT-6 like protein 6)
Rv2347c	2626519	2626223	7	2626513	T	A	ACA->T	TCA->S	non-synonymous	putative ESAT-6 like protein ESXP (ESAT-6 like protein 7)
Rv2347c	2626519	2626223	6	2626514	T	G	GCA->A	GCC->A	synonymous	putative ESAT-6 like protein ESXP (ESAT-6 like protein 7)
Rv2349c	2628698	2627172	1081	2627618	C	A	GGC->G	TGC->C	non-synonymous	phospholipase C 3 PLCC
Rv2349c	2628698	2627172	753	2627946	A	G	CGT->R	CGC->R	synonymous	phospholipase C 3 PLCC
Rv2351c	2632075	2630537	1336	2630740	T	C	ACT->T	GCT->A	non-synonymous	membrane-associated phospholipase C
Rv2351c	2632075	2630537	705	2631371	C	T	GTG->V	GTA->V	synonymous	membrane-associated phospholipase C
Rv2356c	2639535	2637688	958	2638578	C	T	GGC->G	AGC->S	non-synonymous	PPE family protein
Rv2356c	2639535	2637688	954	2638582	A	C	TTT->F	TTG->L	non-synonymous	PPE family protein
Rv2356c	2639535	2637688	952	2638584	A	G	TTT->F	CTT->L	non-synonymous	PPE family protein
Rv2356c	2639535	2637688	946	2638590	A	G	TTC->F	CTC->L	non-synonymous	PPE family protein
Rv2356c	2639535	2637688	943	2638593	C	T	GAC->D	AAC->N	non-synonymous	PPE family protein
Rv2356c	2639535	2637688	939	2638597	G	A	ACC->T	ACT->T	synonymous	PPE family protein
Rv2356c	2639535	2637688	938	2638598	G	A	ACC->T	ATC->I	non-synonymous	PPE family protein
Rv2356c	2639535	2637688	937	2638599	T	C	ACC->T	GCC->A	non-synonymous	PPE family protein
Rv2356c	2639535	2637688	933	2638603	C	A	GGG->G	GGT->G	synonymous	PPE family protein
Rv2356c	2639535	2637688	929	2638607	C	A	GGC->G	GTC->V	non-synonymous	PPE family protein
Rv2356c	2639535	2637688	928	2638608	C	T	GGC->G	AGC->S	non-synonymous	PPE family protein
Rv2356c	2639535	2637688	924	2638612	G	C	TTC->F	TTG->L	non-synonymous	PPE family protein
Rv2356c	2639535	2637688	922	2638614	A	G	TTC->F	CTC->L	non-synonymous	PPE family protein
Rv2356c	2639535	2637688	921	2638615	A	G	AAT->N	AAC->N	synonymous	PPE family protein
Rv2356c	2639535	2637688	916	2638620	C	T	GTC->V	ATC->I	non-synonymous	PPE family protein
Rv2356c	2639535	2637688	915	2638621	A	G	GAT->D	GAC->D	synonymous	PPE family protein
Rv2356c	2639535	2637688	909	2638627	G	T	AAC->N	AAA->K	non-synonymous	PPE family protein
Rv2356c	2639535	2637688	718	2638818	T	C	AGC->S	GGC->G	non-synonymous	PPE family protein
Rv2356c	2639535	2637688	714	2638822	C	T	CTG->L	CTA->L	synonymous	PPE family protein
Rv2356c	2639535	2637688	704	2638832	C	T	GGC->G	GAC->D	non-synonymous	PPE family protein
Rv2356c	2639535	2637688	703	2638833	C	T	GGC->G	AGC->S	non-synonymous	PPE family protein
Rv2356c	2639535	2637688	697	2638839	C	T	GTC->V	ATC->I	non-synonymous	PPE family protein
Rv2356c	2639535	2637688	690	2638846	A	G	AGT->S	AGC->S	synonymous	PPE family protein
Rv2356c	2639535	2637688	684	2638852	C	G	GTG->V	GTC->V	synonymous	PPE family protein
Rv2356c	2639535	2637688	678	2638858	G	C	ACC->T	ACG->T	synonymous	PPE family protein
Rv2356c	2639535	2637688	675	2638861	A	G	GGT->G	GGC->G	synonymous	PPE family protein
Rv2356c	2639535	2637688	674	2638862	C	T	GGT->G	GAT->D	non-synonymous	PPE family protein
Rv2356c	2639535	2637688	672	2638864	G	A	GGC->G	GGT->G	synonymous	PPE family protein
Rv2356c	2639535	2637688	668	2638868	A	G	ATC->I	ACC->T	non-synonymous	PPE family protein
Rv2356c	2639535	2637688	666	2638870	G	A	AAC->N	AAT->N	synonymous	PPE family protein
Rv2356c	2639535	2637688	663	2638873	G	T	GGC->G	GGA->G	synonymous	PPE family protein
Rv2356c	2639535	2637688	652	2638884	G	A	CTG->L	TTG->L	synonymous	PPE family protein
Rv2356c	2639535	2637688	651	2638885	G	A	AAC->N	AAT->N	synonymous	PPE family protein
Rv2356c	2639535	2637688	644	2638892	C	G	AGC->S	ACC->T	non-synonymous	PPE family protein
Rv2356c	2639535	2637688	643	2638893	T	A	AGC->S	TGC->C	non-synonymous	PPE family protein
Rv2356c	2639535	2637688	642	2638894	G	C	GGC->G	GGG->G	synonymous	PPE family protein
Rv2356c	2639535	2637688	630	2638906	G	A	GTC->V	GTT->V	synonymous	PPE family protein
Rv2356c	2639535	2637688	628	2638908	C	A	GTC->V	TTC->F	non-synonymous	PPE family protein
Rv2356c	2639535	2637688	627	2638909	A	G	GGT->G	GGC->G	synonymous	PPE family protein
Rv2356c	2639535	2637688	624	2638912	C	G	TTG->L	TTC->F	non-synonymous	PPE family protein
Rv2356c	2639535	2637688	621	2638915	A	G	AAT->N	AAC->N	synonymous	PPE family protein
Rv2356c	2639535	2637688	618	2638918	C	G	TTG->L	TTC->F	non-synonymous	PPE family protein
Rv2356c	2639535	2637688	616	2638920	A	T	TTG->L	ATG->M	non-synonymous	PPE family protein
Rv2356c	2639535	2637688	614	2638922	G	C	ACC->T	AGC->S	non-synonymous	PPE family protein
Rv2356c	2639535	2637688	613	2638923	T	C	ACC->T	GCC->A	non-synonymous	PPE family protein
Rv2356c	2639535	2637688	611	2638925	A	T	CTG->L	CAG->Q	non-synonymous	PPE family protein
Rv2356c	2639535	2637688	608	2638928	T	A	GAG->E	GTG->V	non-synonymous	PPE family protein
Rv2356c	2639535	2637688	607	2638929	C	G	GAG->E	CAG->Q	non-synonymous	PPE family protein
Rv2356c	2639535	2637688	606	2638930	G	A	GCC->A	GCT->A	synonymous	PPE family protein
Rv2356c	2639535	2637688	603	2638933	G	C	CTC->L	CTG->L	synonymous	PPE family protein
Rv2356c	2639535	2637688	598	2638938	C	A	GGC->G	TGC->C	non-synonymous	PPE family protein
Rv2356c	2639535	2637688	597	2638939	T	C	CAA->Q	CAG->Q	synonymous	PPE family protein
Rv2356c	2639535	2637688	596	2638940	T	G	CAA->Q	CCA->P	non-synonymous	PPE family protein
Rv2356c	2639535	2637688	592	2638944	C	G	GCA->A	CCA->P	non-synonymous	PPE family protein
Rv2356c	2639535	2637688	588	2638948	G	T	GGC->G	GGA->G	synonymous	PPE family protein
Rv2356c	2639535	2637688	587	2638949	C	G	GGC->G	GCC->A	non-synonymous	PPE family protein
Rv2356c	2639535	2637688	582	2638954	T	G	GCA->A	GCC->A	synonymous	PPE family protein
Rv2356c	2639535	2637688	579	2638957	A	G	GCT->A	GCC->A	synonymous	PPE family protein
Rv2356c	2639535	2637688	577	2638959	C	T	GCT->A	ACT->T	non-synonymous	PPE family protein
Rv2356c	2639535	2637688	576	2638960	G	C	GCC->A	GCG->A	synonymous	PPE family protein
Rv2356c	2639535	2637688	575	2638961	G	A	GCC->A	GTC->V	non-synonymous	PPE family protein
Rv2356c	2639535	2637688	570	2638966	C	T	CCG->P	CCA->P	synonymous	PPE family protein
Rv2356c	2639535	2637688	569	2638967	G	T	CCG->P	CAG->Q	non-synonymous	PPE family protein
Rv2356c	2639535	2637688	567	2638969	T	C	GCA->A	GCG->A	synonymous	PPE family protein
Rv2356c	2639535	2637688	563	2638973	T	C	AAC->N	AGC->S	non-synonymous	PPE family protein
Rv2356c	2639535	2637688	561	2638975	A	G	GCT->A	GCC->A	synonymous	PPE family protein
Rv2356c	2639535	2637688	559	2638977	C	A	GCT->A	TCT->S	non-synonymous	PPE family protein
Rv2356c	2639535	2637688	553	2638983	C	T	GGT->G	AGT->S	non-synonymous	PPE family protein
Rv2356c	2639535	2637688	552	2638984	G	A	GGC->G	GGT->G	synonymous	PPE family protein
Rv2356c	2639535	2637688	551	2638985	C	T	GGC->G	GAC->D	non-synonymous	PPE family protein
Rv2356c	2639535	2637688	539	2638997	G	A	TCG->S	TTG->L	non-synonymous	PPE family protein
Rv2360c	2642578	2642150	196	2642383	C	T	GCC->A	ACC->T	non-synonymous	hypothetical protein Rv2360c
Rv2366c	2648367	2647060	463	2647905	G	A	CGC->R	TGC->C	non-synonymous	transmembrane protein
Rv2377c	2656430	2656215	206	2656225	A	G	GTC->V	GCC->A	non-synonymous	putative protein MbtH
Rv2379c	2662085	2657700	1767	2660319	C	G	GAG->E	GAC->D	non-synonymous	peptide synthetase MBTF (peptide synthase)
Rv2380c	2667115	2662067	3321	2663795	G	A	GCC->A	GCT->A	synonymous	peptide synthetase MBTE (peptide synthase)
Rv2383c	2675837	2671593	2020	2673818	C	G	GTG->V	CTG->L	non-synonymous	phenyloxazoline synthase MBTB (phenyloxazoline synthetase)
Rv2398c	2695799	2694981	422	2695378	C	G	GGC->G	GCC->A	non-synonymous	sulfate-transport integral membrane protein ABC transporter CysW
Rv2400c	2697714	2696644	226	2697489	C	T	GCG->A	ACG->T	non-synonymous	sulfate-binding lipoprotein
Rv2408	2706017	2706736	647	2706663	G	T	GGT->G	GTT->V	non-synonymous	PE family protein
Rv2409c	2707333	2706494	671	2706663	G	T	ACC->T	AAC->N	non-synonymous	hypothetical protein Rv2409c
Rv2414c	2712876	2711332	1155	2711722	T	G	CCA->P	CCC->P	synonymous	hypothetical protein Rv2414c
Rv2416c	2715332	2714124	487	2714846	C	T	GTC->V	ATC->I	non-synonymous	hypothetical protein Rv2416c
Rv2424c	2721777	2720776	826	2720952	T	C	ACC->T	GCC->A	non-synonymous	transposase
Rv2424c	2721777	2720776	824	2720954	G	A	ACC->T	ATC->I	non-synonymous	transposase
Rv2424c	2721777	2720776	216	2721562	C	G	GCG->A	GCC->A	synonymous	transposase
Rv2426c	2724183	2723308	678	2723506	T	C	TTA->L	TTG->L	synonymous	hypothetical protein Rv2426c
Rv2433c	2729134	2728844	77	2729058	A	C	CTG->L	CGG->R	non-synonymous	hypothetical protein Rv2433c
Rv2436	2733230	2734144	845	2734074	T	C	GTC->V	GCC->A	non-synonymous	ribokinase RBSK
Rv2439c	2738247	2737117	676	2737572	C	A	GCG->A	TCG->S	non-synonymous	gamma-glutamyl kinase
Rv2440c	2739686	2738247	1413	2738274	A	C	AGT->S	AGG->R	non-synonymous	GTPase ObgE
Rv2443	2740709	2742184	501	2741209	G	A	CTG->L	CTA->L	synonymous	C4-dicarboxylate-transport transmembrane protein DctA
Rv2450c	2752180	2751662	377	2751804	C	T	CGG->R	CAG->Q	non-synonymous	resuscitation-promoting factor RpfE
Rv2450c	2752180	2751662	59	2752122	G	C	ACG->T	AGG->R	non-synonymous	resuscitation-promoting factor RpfE
Rv2458	2759779	2760687	374	2760152	A	G	TAC->Y	TGC->C	non-synonymous	homocysteine methyltransferase
Rv2462c	2765291	2763891	93	2765199	G	A	GCC->A	GCT->A	synonymous	trigger factor
Rv2471	2773564	2775204	992	2774555	T	C	GTG->V	GCG->A	non-synonymous	alpha-glucosidase AglA
Rv2471	2773564	2775204	1621	2775184	G	A	GCC->A	ACC->T	non-synonymous	alpha-glucosidase AglA
Rv2472	2775272	2775565	90	2775361	C	T	CGC->R	CGT->R	synonymous	hypothetical protein Rv2472
Rv2476c	2782262	2777388	3127	2779136	T	C	AGC->S	GGC->G	non-synonymous	NAD-dependent glutamate dehydrogenase
Rv2476c	2782262	2777388	1848	2780415	G	A	GCC->A	GCT->A	synonymous	NAD-dependent glutamate dehydrogenase
Rv2482c	2789283	2786914	2332	2786952	A	G	TGC->C	CGC->R	non-synonymous	glycerol-3-phosphate acyltransferase
Rv2483c	2791022	2789280	1225	2789798	G	T	CGG->R	AGG->R	synonymous	bifunctionnal putative L-3-phosphoserine phosphatase/1-acyl-SN-glycerol-3-phosphate acyltransferase
Rv2484c	2792494	2791019	1397	2791098	C	T	GGT->G	GAT->D	non-synonymous	hypothetical protein Rv2484c
Rv2485c	2793988	2792723	179	2793810	C	A	CGC->R	CTC->L	non-synonymous	carboxylesterase LipQ
Rv2488c	2800880	2797467	3202	2797679	C	T	GGC->G	AGC->S	non-synonymous	LuxR family transcriptional regulator
Rv2488c	2800880	2797467	794	2800087	G	A	ACC->T	ATC->I	non-synonymous	LuxR family transcriptional regulator
Rv2490c	2806236	2801254	4196	2802041	C	T	GGC->G	GAC->D	non-synonymous	PE-PGRS family protein
Rv2490c	2806236	2801254	2745	2803492	C	T	GCG->A	GCA->A	synonymous	PE-PGRS family protein
Rv2490c	2806236	2801254	1603	2804634	C	T	GGG->G	AGG->R	non-synonymous	PE-PGRS family protein
Rv2492	2807278	2808030	209	2807486	C	A	GCC->A	GAC->D	non-synonymous	hypothetical protein Rv2492
Rv2494	2808310	2808735	143	2808452	T	C	GTG->V	GCG->A	non-synonymous	hypothetical protein Rv2494
Rv2495c	2809939	2808758	319	2809621	T	C	ACC->T	GCC->A	non-synonymous	branched-chain alpha-keto acid dehydrogenase subunit E2
Rv2495c	2809939	2808758	307	2809633	A	C	TAC->Y	GAC->D	non-synonymous	branched-chain alpha-keto acid dehydrogenase subunit E2
Rv2502c	2818474	2816885	973	2817502	A	C	TTT->F	GTT->V	non-synonymous	acetyl-/propionyl-CoA carboxylase subunit beta
Rv2503c	2819127	2818471	291	2818837	A	G	GGT->G	GGC->G	synonymous	succinyl-CoA:3-ketoacid-coenzyme A transferase subunit beta ScoB
Rv2505c	2821596	2819953	255	2821342	C	T	GCG->A	GCA->A	synonymous	AMP-binding domain protein
Rv2509	2824678	2825484	789	2825466	G	A	AAG->K	AAA->K	synonymous	short-chain type dehydrogenase/reductase
Rv2510c	2827089	2825488	1509	2825581	T	G	ATA->I	ATC->I	synonymous	hypothetical protein Rv2510c
Rv2512c	2829803	2828556	510	2829294	C	T	GTG->V	GTA->V	synonymous	IS1081 transposase
Rv2512c	2829803	2828556	25	2829779	T	C	ACC->T	GCC->A	non-synonymous	IS1081 transposase
Rv2513	2830161	2830583	365	2830525	C	A	ACG->T	AAG->K	non-synonymous	hypothetical protein Rv2513
Rv2516c	2833513	2832710	185	2833329	G	A	GCT->A	GTT->V	non-synonymous	hypothetical protein Rv2516c
Rv2519	2835785	2837263	200	2835984	T	C	GTG->V	GCG->A	non-synonymous	PE family protein
Rv2524c	2849332	2840123	8311	2841022	A	G	TGC->C	CGC->R	non-synonymous	fatty acid synthase
Rv2524c	2849332	2840123	2052	2847281	A	G	GAT->D	GAC->D	synonymous	fatty acid synthase
Rv2526	2851091	2851318	77	2851167	T	C	TTG->L	TCG->S	non-synonymous	hypothetical protein Rv2526
Rv2531c	2857781	2854938	2523	2855259	A	G	GCT->A	GCC->A	synonymous	amino acid decarboxylase
Rv2542	2865130	2866341	631	2865760	A	G	ACC->T	GCC->A	non-synonymous	hypothetical protein Rv2542
Rv2542	2865130	2866341	753	2865882	T	C	GTT->V	GTC->V	synonymous	hypothetical protein Rv2542
Rv2543	2866468	2867127	102	2866569	C	A	ACC->T	ACA->T	synonymous	lipoprotein LppA
Rv2543	2866468	2867127	111	2866578	C	A	CAC->H	CAA->Q	non-synonymous	lipoprotein LppA
Rv2543	2866468	2867127	113	2866580	A	G	AAC->N	AGC->S	non-synonymous	lipoprotein LppA
Rv2544	2867124	2867786	140	2867263	G	A	GGC->G	GAC->D	non-synonymous	lipoprotein LppB
Rv2544	2867124	2867786	175	2867298	C	A	CAC->H	AAC->N	non-synonymous	lipoprotein LppB
Rv2544	2867124	2867786	224	2867347	A	G	CAG->Q	CGG->R	non-synonymous	lipoprotein LppB
Rv2544	2867124	2867786	278	2867401	A	C	AAC->N	ACC->T	non-synonymous	lipoprotein LppB
Rv2544	2867124	2867786	282	2867405	C	A	GAC->D	GAA->E	non-synonymous	lipoprotein LppB
Rv2544	2867124	2867786	285	2867408	C	T	GAC->D	GAT->D	synonymous	lipoprotein LppB
Rv2544	2867124	2867786	286	2867409	T	C	TCC->S	CCC->P	non-synonymous	lipoprotein LppB
Rv2544	2867124	2867786	289	2867412	T	G	TAC->Y	GAC->D	non-synonymous	lipoprotein LppB
Rv2544	2867124	2867786	290	2867413	A	C	TAC->Y	TCC->S	non-synonymous	lipoprotein LppB
Rv2544	2867124	2867786	294	2867417	C	G	GGC->G	GGG->G	synonymous	lipoprotein LppB
Rv2544	2867124	2867786	296	2867419	A	G	CAA->Q	CGA->R	non-synonymous	lipoprotein LppB
Rv2544	2867124	2867786	298	2867421	G	A	GAC->D	AAC->N	non-synonymous	lipoprotein LppB
Rv2544	2867124	2867786	300	2867423	C	G	GAC->D	GAG->E	non-synonymous	lipoprotein LppB
Rv2544	2867124	2867786	301	2867424	T	G	TTC->F	GTC->V	non-synonymous	lipoprotein LppB
Rv2544	2867124	2867786	302	2867425	T	C	TTC->F	TCC->S	non-synonymous	lipoprotein LppB
Rv2544	2867124	2867786	304	2867427	T	G	TAT->Y	GAT->D	non-synonymous	lipoprotein LppB
Rv2544	2867124	2867786	307	2867430	A	C	AGA->R	CGA->R	synonymous	lipoprotein LppB
Rv2544	2867124	2867786	309	2867432	A	G	AGA->R	AGG->R	synonymous	lipoprotein LppB
Rv2544	2867124	2867786	310	2867433	A	G	AAT->N	GAT->D	non-synonymous	lipoprotein LppB
Rv2544	2867124	2867786	312	2867435	T	A	AAT->N	AAA->K	non-synonymous	lipoprotein LppB
Rv2544	2867124	2867786	315	2867438	A	T	GGA->G	GGT->G	synonymous	lipoprotein LppB
Rv2544	2867124	2867786	317	2867440	C	T	TCG->S	TTG->L	non-synonymous	lipoprotein LppB
Rv2544	2867124	2867786	320	2867443	T	C	TTG->L	TCG->S	non-synonymous	lipoprotein LppB
Rv2544	2867124	2867786	324	2867447	T	C	TGT->C	TGC->C	synonymous	lipoprotein LppB
Rv2544	2867124	2867786	335	2867458	G	C	AGT->S	ACT->T	non-synonymous	lipoprotein LppB
Rv2544	2867124	2867786	336	2867459	T	C	AGT->S	AGC->S	synonymous	lipoprotein LppB
Rv2544	2867124	2867786	338	2867461	C	G	GCC->A	GGC->G	non-synonymous	lipoprotein LppB
Rv2544	2867124	2867786	360	2867483	G	C	ATG->M	ATC->I	non-synonymous	lipoprotein LppB
Rv2544	2867124	2867786	364	2867487	A	G	AAA->K	GAA->E	non-synonymous	lipoprotein LppB
Rv2544	2867124	2867786	366	2867489	A	C	AAA->K	AAC->N	non-synonymous	lipoprotein LppB
Rv2544	2867124	2867786	367	2867490	C	G	CCG->P	GCG->A	non-synonymous	lipoprotein LppB
Rv2544	2867124	2867786	369	2867492	G	A	CCG->P	CCA->P	synonymous	lipoprotein LppB
Rv2544	2867124	2867786	373	2867496	G	A	GAC->D	AAC->N	non-synonymous	lipoprotein LppB
Rv2544	2867124	2867786	374	2867497	A	T	GAC->D	GTC->V	non-synonymous	lipoprotein LppB
Rv2544	2867124	2867786	378	2867501	C	T	TTC->F	TTT->F	synonymous	lipoprotein LppB
Rv2544	2867124	2867786	383	2867506	G	C	AGC->S	ACC->T	non-synonymous	lipoprotein LppB
Rv2544	2867124	2867786	384	2867507	C	T	AGC->S	AGT->S	synonymous	lipoprotein LppB
Rv2544	2867124	2867786	385	2867508	A	G	ACA->T	GCA->A	non-synonymous	lipoprotein LppB
Rv2544	2867124	2867786	387	2867510	A	G	ACA->T	ACG->T	synonymous	lipoprotein LppB
Rv2544	2867124	2867786	399	2867522	A	G	GAA->E	GAG->E	synonymous	lipoprotein LppB
Rv2544	2867124	2867786	409	2867532	A	G	ATT->I	GTT->V	non-synonymous	lipoprotein LppB
Rv2544	2867124	2867786	413	2867536	C	T	GCC->A	GTC->V	non-synonymous	lipoprotein LppB
Rv2544	2867124	2867786	415	2867538	G	A	GCC->A	ACC->T	non-synonymous	lipoprotein LppB
Rv2544	2867124	2867786	429	2867552	A	G	CGA->R	CGG->R	synonymous	lipoprotein LppB
Rv2544	2867124	2867786	452	2867575	T	C	GTG->V	GCG->A	non-synonymous	lipoprotein LppB
Rv2544	2867124	2867786	471	2867594	G	A	CTG->L	CTA->L	synonymous	lipoprotein LppB
Rv2544	2867124	2867786	633	2867756	T	C	ATT->I	ATC->I	synonymous	lipoprotein LppB
Rv2560	2880075	2881052	628	2880702	G	C	GTC->V	CTC->L	non-synonymous	hypothetical protein Rv2560
Rv2562	2881758	2882147	217	2881974	G	A	GCC->A	ACC->T	non-synonymous	hypothetical protein Rv2562
Rv2564	2883342	2884334	727	2884068	A	C	ATG->M	CTG->L	non-synonymous	glutamine-transport ATP-binding protein ABC transporter GlnQ
Rv2566	2886373	2889795	198	2886570	A	G	GAA->E	GAG->E	synonymous	hypothetical protein Rv2566
Rv2566	2886373	2889795	1829	2888201	T	C	CTC->L	CCC->P	non-synonymous	hypothetical protein Rv2566
Rv2566	2886373	2889795	3261	2889633	T	C	GCT->A	GCC->A	synonymous	hypothetical protein Rv2566
Rv2567	2889795	2892449	1473	2891267	C	T	GGC->G	GGT->G	synonymous	hypothetical protein Rv2567
Rv2567	2889795	2892449	1585	2891379	A	C	ACC->T	CCC->P	non-synonymous	hypothetical protein Rv2567
Rv2567	2889795	2892449	1934	2891728	A	G	CAG->Q	CGG->R	non-synonymous	hypothetical protein Rv2567
Rv2569c	2894408	2893464	201	2894208	G	A	AGC->S	AGT->S	synonymous	hypothetical protein Rv2569c
Rv2573	2897956	2898783	567	2898522	T	C	TAT->Y	TAC->Y	synonymous	2-dehydropantoate 2-reductase
Rv2578c	2903531	2902509	93	2903439	G	A	AGC->S	AGT->S	synonymous	hypothetical protein Rv2578c
Rv2584c	2910900	2910229	440	2910461	G	T	GCG->A	GAG->E	non-synonymous	adenine phosphoribosyltransferase
Rv2585c	2912677	2911004	1385	2911293	C	G	TGT->C	TCT->S	non-synonymous	lipoprotein
Rv2585c	2912677	2911004	384	2912294	T	G	GCA->A	GCC->A	synonymous	lipoprotein
Rv2588c	2916193	2915846	329	2915865	C	G	CGG->R	CCG->P	non-synonymous	preprotein translocase subunit YajC
Rv2590	2917871	2921377	2480	2920350	T	C	GTG->V	GCG->A	non-synonymous	fatty-acid-CoA ligase
Rv2591	2921551	2923182	1296	2922846	C	T	GGC->G	GGT->G	synonymous	PE-PGRS family protein
Rv2591	2921551	2923182	1298	2922848	A	T	CAG->Q	CTG->L	non-synonymous	PE-PGRS family protein
Rv2592c	2924233	2923199	843	2923391	T	C	CCA->P	CCG->P	synonymous	Holliday junction DNA helicase RuvB
Rv2596	2925734	2926138	229	2925962	T	C	TGC->C	CGC->R	non-synonymous	hypothetical protein Rv2596
Rv2611c	2939962	2939012	590	2939373	G	C	TCT->S	TGT->C	non-synonymous	lipid A biosynthesis lauroyl acyltransferase
Rv2611c	2939962	2939012	306	2939657	T	C	ATA->I	ATG->M	non-synonymous	lipid A biosynthesis lauroyl acyltransferase
Rv2614A	2943376	2943603	36	2943411	T	C	CTT->L	CTC->L	synonymous	hypothetical protein Rv2614A
Rv2615c	2944985	2943600	471	2944515	A	C	GGT->G	GGG->G	synonymous	PE-PGRS family protein
Rv2615c	2944985	2943600	462	2944524	C	G	GGG->G	GGC->G	synonymous	PE-PGRS family protein
Rv2615c	2944985	2943600	217	2944769	G	C	CAA->Q	GAA->E	non-synonymous	PE-PGRS family protein
Rv2615c	2944985	2943600	213	2944773	A	G	TAT->Y	TAC->Y	synonymous	PE-PGRS family protein
Rv2621c	2948558	2947884	329	2948230	G	A	GCC->A	GTC->V	non-synonymous	transcriptional regulatory protein
Rv2627c	2954748	2953507	310	2954439	T	C	AGA->R	GGA->G	non-synonymous	hypothetical protein Rv2627c
Rv2629	2955767	2956891	191	2955957	A	C	GAT->D	GCT->A	non-synonymous	hypothetical protein Rv2629
Rv2630	2956893	2957432	90	2956982	C	T	CGC->R	CGT->R	synonymous	hypothetical protein Rv2630
Rv2650c	2975234	2973795	302	2974933	A	G	ATC->I	ACC->T	non-synonymous	phiRv2 prophage protein
Rv2650c	2975234	2973795	8	2975227	T	G	AAT->N	ACT->T	non-synonymous	phiRv2 prophage protein
Rv2666	2983071	2983874	25	2983095	A	G	ACC->T	GCC->A	non-synonymous	truncated IS1081 transposase
Rv2666	2983071	2983874	510	2983580	G	A	GTG->V	GTA->V	synonymous	truncated IS1081 transposase
Rv2666	2983071	2983874	543	2983613	G	A	GGG->G	GGA->G	synonymous	truncated IS1081 transposase
Rv2666	2983071	2983874	803	2983873	A	G	TAA->*	TGA->*	synonymous	truncated IS1081 transposase
Rv2668	2984733	2985254	8	2984740	A	G	CAC->H	CGC->R	non-synonymous	hypothetical protein Rv2668
Rv2672	2987682	2989268	949	2988630	C	G	CAT->H	GAT->D	non-synonymous	secreted protease
Rv2678c	2995062	2993989	876	2994187	T	C	TTA->L	TTG->L	synonymous	uroporphyrinogen decarboxylase
Rv2680	2996105	2996737	90	2996194	T	A	GTT->V	GTA->V	synonymous	hypothetical protein Rv2680
Rv2685	3001983	3003269	1133	3003115	C	G	GCA->A	GGA->G	non-synonymous	arsenic-transport integral membrane protein ArsB1
Rv2688c	3005650	3004745	466	3005185	G	T	CCC->P	ACC->T	non-synonymous	antibiotic ABC transporter ATP-binding protein
Rv2689c	3007062	3005845	517	3006546	C	A	GTA->V	TTA->L	non-synonymous	hypothetical protein Rv2689c
Rv2691	3009344	3010027	349	3009692	A	G	ACC->T	GCC->A	non-synonymous	TRK system potassium uptake protein CEOB
Rv2691	3009344	3010027	491	3009834	A	G	GAT->D	GGT->G	non-synonymous	TRK system potassium uptake protein CEOB
Rv2692	3010024	3010686	397	3010420	A	G	ATC->I	GTC->V	non-synonymous	TRK system potassium uptake protein CEOC
Rv2693c	3011368	3010697	376	3010993	C	T	GGG->G	AGG->R	non-synonymous	integral membrane alanine and leucine rich protein
Rv2695	3011916	3012623	378	3012293	A	G	ACA->T	ACG->T	synonymous	hypothetical protein Rv2695
Rv2702	3016858	3017655	608	3017465	T	C	ATA->I	ACA->T	non-synonymous	polyphosphate glucokinase PPGK (polyphosphate-glucose phosphotransferase)
Rv2711	3023565	3024257	457	3024021	C	A	CGG->R	AGG->R	synonymous	IRON-dependent repressor and activator IDER
Rv2712c	3025328	3024270	986	3024343	G	A	ACC->T	ATC->I	non-synonymous	hypothetical protein Rv2712c
Rv2714	3027065	3028039	734	3027798	T	C	GTG->V	GCG->A	non-synonymous	hypothetical protein Rv2714
Rv2715	3028098	3029123	787	3028884	C	T	CCG->P	TCG->S	non-synonymous	hydrolase
Rv2719c	3031537	3031040	370	3031168	A	G	TAT->Y	CAT->H	non-synonymous	hypothetical protein Rv2719c
Rv2721c	3034619	3032520	1431	3033189	G	A	CCC->P	CCT->P	synonymous	hypothetical protein Rv2721c
Rv2724c	3037291	3036131	466	3036826	C	T	GTG->V	ATG->M	non-synonymous	acyl-CoA dehydrogenase FADE20
Rv2729c	3042475	3041570	605	3041871	G	T	GCG->A	GAG->E	non-synonymous	hypothetical protein Rv2729c
Rv2736c	3049086	3048562	175	3048912	C	G	GTT->V	CTT->L	non-synonymous	recombination regulator RecX
Rv2741	3053914	3055491	168	3054081	A	G	GGA->G	GGG->G	synonymous	PE-PGRS family protein
Rv2741	3053914	3055491	408	3054321	A	G	GGA->G	GGG->G	synonymous	PE-PGRS family protein
Rv2741	3053914	3055491	811	3054724	A	G	AGC->S	GGC->G	non-synonymous	PE-PGRS family protein
Rv2742c	3056348	3055515	213	3056136	G	A	ACC->T	ACT->T	synonymous	hypothetical protein Rv2742c
Rv2756c	3070083	3068461	917	3069167	A	G	CTG->L	CCG->P	non-synonymous	type I restriction/modification system DNA methylase HsdM
Rv2769c	3078985	3078158	808	3078178	C	T	GTG->V	ATG->M	non-synonymous	PE family protein
Rv2769c	3078985	3078158	407	3078579	G	A	GCC->A	GTC->V	non-synonymous	PE family protein
Rv2770c	3080457	3079309	581	3079877	A	G	TTC->F	TCC->S	non-synonymous	PPE family protein
Rv2771c	3081033	3080581	239	3080795	A	G	CTC->L	CCC->P	non-synonymous	hypothetical protein Rv2771c
Rv2794c	3103940	3103257	259	3103682	T	C	ATG->M	GTG->V	non-synonymous	hypothetical protein Rv2794c
Rv2795c	3104911	3103937	723	3104189	A	G	TGT->C	TGC->C	synonymous	hypothetical protein Rv2795c
Rv2802c	3111823	3110780	348	3111476	C	T	TCG->S	TCA->S	synonymous	hypothetical protein Rv2802c
Rv2804c	3113094	3112465	218	3112877	G	A	GCC->A	GTC->V	non-synonymous	hypothetical protein Rv2804c
Rv2805	3112867	3113271	11	3112877	G	A	GGC->G	GAC->D	non-synonymous	hypothetical protein Rv2805
Rv2807	3113658	3114812	215	3113872	A	T	GAG->E	GTG->V	non-synonymous	hypothetical protein Rv2807
Rv2812	3116818	3118227	1183	3118000	A	G	AGG->R	GGG->G	non-synonymous	transposase
Rv2825c	3133539	3132892	486	3133054	C	G	TCG->S	TCC->S	synonymous	hypothetical protein Rv2825c
Rv2825c	3133539	3132892	485	3133055	G	C	TCG->S	TGG->W	non-synonymous	hypothetical protein Rv2825c
Rv2825c	3133539	3132892	4	3133536	T	C	AAA->K	GAA->E	non-synonymous	hypothetical protein Rv2825c
Rv2828c	3136333	3135788	422	3135912	G	C	ACG->T	AGG->R	non-synonymous	hypothetical protein Rv2828c
Rv2828c	3136333	3135788	384	3135950	C	G	TCG->S	TCC->S	synonymous	hypothetical protein Rv2828c
Rv2828c	3136333	3135788	383	3135951	G	C	TCG->S	TGG->W	non-synonymous	hypothetical protein Rv2828c
Rv2830c	3137224	3137009	167	3137058	G	A	GCG->A	GTG->V	non-synonymous	hypothetical protein Rv2830c
Rv2831	3137271	3138020	466	3137736	G	T	GAC->D	TAC->Y	non-synonymous	enoyl-CoA hydratase
Rv2837c	3144645	3143635	23	3144623	C	T	AGT->S	AAT->N	non-synonymous	hypothetical protein Rv2837c
Rv2838c	3145171	3144620	549	3144623	C	T	GAG->E	GAA->E	synonymous	ribosome-binding factor A
Rv2853	3162268	3164115	538	3162805	C	G	CGC->R	GGC->G	non-synonymous	PE-PGRS family protein
Rv2855	3165205	3166584	432	3165636	G	A	TCG->S	TCA->S	synonymous	mycothione reductase
Rv2862c	3174643	3174059	148	3174496	A	G	TGT->C	CGT->R	non-synonymous	hypothetical protein Rv2862c
Rv2866	3177822	3178085	63	3177884	C	A	CGC->R	CGA->R	synonymous	hypothetical protein Rv2866
Rv2869c	3181762	3180548	775	3180988	C	A	GTC->V	TTC->F	non-synonymous	transmembrane protein
Rv2874	3184847	3186934	2014	3186860	T	G	TAT->Y	GAT->D	non-synonymous	integral membrane C-type cytochrome biogenesis protein DipZ
Rv2878c	3189397	3188876	156	3189242	A	G	GCT->A	GCC->A	synonymous	soluble secreted antigen MPT53 precursor
Rv2888c	3198285	3196864	714	3197572	C	T	TGG->W	TGA->*	non-synonymous	amidase
Rv2891	3200266	3201015	17	3200282	C	T	GCG->A	GTG->V	non-synonymous	hypothetical protein Rv2891
Rv2896c	3206434	3205265	457	3205978	A	C	TCG->S	GCG->A	non-synonymous	hypothetical protein Rv2896c
Rv2899c	3209406	3208576	251	3209156	G	A	GCC->A	GTC->V	non-synonymous	formate dehydrogenase accessory protein
Rv2905	3214628	3215572	242	3214869	A	G	CAG->Q	CGG->R	non-synonymous	alanine rich lipoprotein LppW
Rv2916c	3226285	3224708	105	3226181	A	C	CGT->R	CGG->R	synonymous	signal recognition particle protein
Rv2917	3226363	3228243	1781	3228143	G	T	CGG->R	CTG->L	non-synonymous	hypothetical protein Rv2917
Rv2920c	3232506	3231073	940	3231567	C	A	GGT->G	TGT->C	non-synonymous	ammonium transporter
Rv2931	3245445	3251075	1872	3247316	C	G	GAC->D	GAG->E	non-synonymous	phenolpthiocerol synthesis type-I polyketide synthase PPSA
Rv2931	3245445	3251075	2407	3247851	G	A	GCC->A	ACC->T	non-synonymous	phenolpthiocerol synthesis type-I polyketide synthase PPSA
Rv2931	3245445	3251075	2409	3247853	C	T	GCC->A	GCT->A	synonymous	phenolpthiocerol synthesis type-I polyketide synthase PPSA
Rv2931	3245445	3251075	2412	3247856	G	C	CGG->R	CGC->R	synonymous	phenolpthiocerol synthesis type-I polyketide synthase PPSA
Rv2931	3245445	3251075	2421	3247865	G	T	GCG->A	GCT->A	synonymous	phenolpthiocerol synthesis type-I polyketide synthase PPSA
Rv2931	3245445	3251075	2422	3247866	C	A	CAA->Q	AAA->K	non-synonymous	phenolpthiocerol synthesis type-I polyketide synthase PPSA
Rv2931	3245445	3251075	2423	3247867	A	G	CAA->Q	CGA->R	non-synonymous	phenolpthiocerol synthesis type-I polyketide synthase PPSA
Rv2931	3245445	3251075	2424	3247868	A	G	CAA->Q	CAG->Q	synonymous	phenolpthiocerol synthesis type-I polyketide synthase PPSA
Rv2931	3245445	3251075	2425	3247869	A	G	AAC->N	GAC->D	non-synonymous	phenolpthiocerol synthesis type-I polyketide synthase PPSA
Rv2931	3245445	3251075	2430	3247874	G	A	CGG->R	CGA->R	synonymous	phenolpthiocerol synthesis type-I polyketide synthase PPSA
Rv2931	3245445	3251075	2433	3247877	T	C	TTT->F	TTC->F	synonymous	phenolpthiocerol synthesis type-I polyketide synthase PPSA
Rv2931	3245445	3251075	2439	3247883	T	C	AGT->S	AGC->S	synonymous	phenolpthiocerol synthesis type-I polyketide synthase PPSA
Rv2931	3245445	3251075	2630	3248074	G	A	CGC->R	CAC->H	non-synonymous	phenolpthiocerol synthesis type-I polyketide synthase PPSA
Rv2931	3245445	3251075	2631	3248075	C	T	CGC->R	CGT->R	synonymous	phenolpthiocerol synthesis type-I polyketide synthase PPSA
Rv2931	3245445	3251075	3581	3249025	T	G	CTA->L	CGA->R	non-synonymous	phenolpthiocerol synthesis type-I polyketide synthase PPSA
Rv2932	3251072	3255688	3294	3254365	T	C	CTT->L	CTC->L	synonymous	phenolpthiocerol synthesis type-I polyketide synthase PPSB
Rv2933	3255685	3262251	810	3256494	A	G	GGA->G	GGG->G	synonymous	phenolpthiocerol synthesis type-I polyketide synthase PPSC
Rv2934	3262248	3267731	3783	3266030	A	G	TCA->S	TCG->S	synonymous	phenolpthiocerol synthesis type-I polyketide synthase PPSD
Rv2935	3267737	3272203	1845	3269581	A	G	GCA->A	GCG->A	synonymous	phenolpthiocerol synthesis type-I polyketide synthase PPSE
Rv2935	3267737	3272203	3048	3270784	A	G	CAA->Q	CAG->Q	synonymous	phenolpthiocerol synthesis type-I polyketide synthase PPSE
Rv2940c	3282715	3276380	6013	3276703	T	G	ACT->T	CCT->P	non-synonymous	multifunctional mycocerosic acid synthase membrane-associated MAS
Rv2941	3283335	3285077	1306	3284640	A	G	ACA->T	GCA->A	non-synonymous	acyl-CoA synthetase
Rv2941	3283335	3285077	1521	3284855	C	T	ATC->I	ATT->I	synonymous	acyl-CoA synthetase
Rv2946c	3296353	3291503	3215	3293139	T	G	AAG->K	ACG->T	non-synonymous	polyketide synthase PKS1
Rv2947c	3297840	3296350	998	3296843	A	G	GTG->V	GCG->A	non-synonymous	polyketide synthase PKS15
Rv2952	3304441	3305253	526	3304966	G	A	GGG->G	AGG->R	non-synonymous	methyltransferase (methylase)
Rv2962c	3315122	3313773	711	3314412	A	G	GCT->A	GCC->A	synonymous	glycosyl transferase
Rv2964	3316529	3317461	427	3316955	A	C	ATG->M	CTG->L	non-synonymous	formyltetrahydrofolate deformylase
Rv2967c	3323046	3319663	1490	3321557	G	A	GCA->A	GTA->V	non-synonymous	pyruvate carboxylase
Rv2971	3326101	3326949	454	3326554	A	C	AAC->N	CAC->H	non-synonymous	oxidoreductase
Rv2979c	3335748	3335164	41	3335708	G	C	CCG->P	CGG->R	non-synonymous	resolvase
Rv2981c	3337917	3336796	1093	3336825	T	C	ACA->T	GCA->A	non-synonymous	D-alanyl-alanine synthetase A
Rv2982c	3338999	3337995	397	3338603	G	C	CCG->P	GCG->A	non-synonymous	NAD(P)H-dependent glycerol-3-phosphate dehydrogenase
Rv2995c	3353468	3352458	537	3352932	C	G	ACG->T	ACC->T	synonymous	3-isopropylmalate dehydrogenase
Rv2996c	3355069	3353483	13	3355057	C	T	GTT->V	ATT->I	non-synonymous	D-3-phosphoglycerate dehydrogenase
Rv2999	3357602	3358567	634	3358235	A	T	ATG->M	TTG->L	non-synonymous	lipoprotein LppY
Rv3006	3364709	3365830	148	3364856	C	G	CCC->P	GCC->A	non-synonymous	lipoprotein LppZ
Rv3009c	3368793	3367264	1029	3367765	G	A	GGC->G	GGT->G	synonymous	aspartyl/glutamyl-tRNA amidotransferase subunit B
Rv3011c	3371434	3369950	1258	3370177	T	G	ATG->M	CTG->L	non-synonymous	aspartyl/glutamyl-tRNA amidotransferase subunit A
Rv3015c	3375664	3374651	500	3375165	A	C	TTC->F	TGC->C	non-synonymous	hypothetical protein Rv3015c
Rv3021c	3380452	3379376	745	3379708	G	C	CTG->L	GTG->V	non-synonymous	PPE family protein
Rv3021c	3380452	3379376	741	3379712	G	C	GCC->A	GCG->A	synonymous	PPE family protein
Rv3021c	3380452	3379376	735	3379718	T	C	GGA->G	GGG->G	synonymous	PPE family protein
Rv3021c	3380452	3379376	727	3379726	C	A	GTG->V	TTG->L	non-synonymous	PPE family protein
Rv3021c	3380452	3379376	723	3379730	G	C	GCC->A	GCG->A	synonymous	PPE family protein
Rv3021c	3380452	3379376	721	3379732	C	T	GCC->A	ACC->T	non-synonymous	PPE family protein
Rv3021c	3380452	3379376	718	3379735	A	C	TTG->L	GTG->V	non-synonymous	PPE family protein
Rv3021c	3380452	3379376	717	3379736	C	A	GGG->G	GGT->G	synonymous	PPE family protein
Rv3021c	3380452	3379376	711	3379742	T	C	GTA->V	GTG->V	synonymous	PPE family protein
Rv3021c	3380452	3379376	702	3379751	A	C	GTT->V	GTG->V	synonymous	PPE family protein
Rv3021c	3380452	3379376	696	3379757	A	C	GCT->A	GCG->A	synonymous	PPE family protein
Rv3021c	3380452	3379376	690	3379763	G	A	GCC->A	GCT->A	synonymous	PPE family protein
Rv3021c	3380452	3379376	669	3379784	C	A	GGG->G	GGT->G	synonymous	PPE family protein
Rv3021c	3380452	3379376	665	3379788	C	G	GGG->G	GCG->A	non-synonymous	PPE family protein
Rv3022c	3380682	3380440	149	3380534	A	G	GTG->V	GCG->A	non-synonymous	PPE family protein
Rv3023c	3382622	3381375	543	3382080	C	T	GGG->G	GGA->G	synonymous	transposase
Rv3023c	3382622	3381375	510	3382113	C	T	GTG->V	GTA->V	synonymous	transposase
Rv3041c	3401918	3401055	48	3401871	A	G	GCT->A	GCC->A	synonymous	ABC transporter ATP-binding protein
Rv3042c	3403162	3401933	347	3402816	C	T	GGA->G	GAA->E	non-synonymous	phosphoserine phosphatase
Rv3043c	3404921	3403200	546	3404376	C	G	ACG->T	ACC->T	synonymous	cytochrome C oxidase polypeptide I
Rv3047c	3408306	3408022	157	3408150	T	C	ACA->T	GCA->A	non-synonymous	hypothetical protein Rv3047c
Rv3051c	3414166	3412085	1556	3412611	T	C	CAG->Q	CGG->R	non-synonymous	ribonucleotide-diphosphate reductase subunit alpha
Rv3059	3419492	3420970	1334	3420825	A	G	GAC->D	GGC->G	non-synonymous	cytochrome P450 136
Rv3062	3425584	3427107	271	3425854	C	T	CCG->P	TCG->S	non-synonymous	ATP-dependent DNA ligase
Rv3063	3427243	3429519	1675	3428917	C	A	CGT->R	AGT->S	non-synonymous	carbon starvation protein A CstA
Rv3077	3439541	3441352	635	3440175	T	A	TTC->F	TAC->Y	non-synonymous	hydrolase
Rv3077	3439541	3441352	924	3440464	T	G	CGT->R	CGG->R	synonymous	hydrolase
Rv3077	3439541	3441352	928	3440468	G	C	GGC->G	CGC->R	non-synonymous	hydrolase
Rv3081	3446040	3447278	660	3446699	C	G	TTC->F	TTG->L	non-synonymous	hypothetical protein Rv3081
Rv3084	3449997	3450923	729	3450725	T	C	GTT->V	GTC->V	synonymous	acetyl-hydrolase/esterase LipR
Rv3087	3452925	3454343	1339	3454263	C	G	CTC->L	GTC->V	non-synonymous	hypothetical protein Rv3087
Rv3088	3454340	3455764	1347	3455686	G	C	CTG->L	CTC->L	synonymous	hypothetical protein Rv3088
Rv3089	3455761	3457272	906	3456666	A	G	GCA->A	GCG->A	synonymous	chain-fatty-acid-CoA ligase
Rv3093c	3462764	3461760	630	3462135	G	C	TGC->C	TGG->W	non-synonymous	oxidoreductase
Rv3097c	3467091	3465778	173	3466919	C	G	GGC->G	GCC->A	non-synonymous	triacylglycerol lipase
Rv3098c	3467662	3467210	198	3467465	C	G	GCG->A	GCC->A	synonymous	hypothetical protein Rv3098c
Rv3109	3477649	3478728	294	3477942	A	G	ACA->T	ACG->T	synonymous	molybdenum cofactor biosynthesis protein A
Rv3113	3480074	3480742	401	3480474	G	A	GGA->G	GAA->E	non-synonymous	phosphatase
Rv3114	3480759	3481289	31	3480789	T	C	TCA->S	CCA->P	non-synonymous	hypothetical protein Rv3114
Rv3115	3481451	3482698	510	3481960	G	A	GTG->V	GTA->V	synonymous	transposase
Rv3115	3481451	3482698	543	3481993	G	A	GGG->G	GGA->G	synonymous	transposase
Rv3117	3483974	3484807	153	3484126	G	A	CTG->L	CTA->L	synonymous	thiosulfate sulfurtransferase CysA3
Rv3121	3486509	3487711	469	3486977	A	G	AAA->K	GAA->E	non-synonymous	cytochrome P450 141
Rv3121	3486509	3487711	600	3487108	C	T	GCC->A	GCT->A	synonymous	cytochrome P450 141
Rv3132c	3499265	3497529	1068	3498198	C	T	GAG->E	GAA->E	synonymous	two component sensor histidine kinase DEVS
Rv3132c	3499265	3497529	763	3498503	C	T	GCC->A	ACC->T	non-synonymous	two component sensor histidine kinase DEVS
Rv3134c	3500749	3499943	601	3500149	G	A	CTG->L	TTG->L	synonymous	hypothetical protein Rv3134c
Rv3134c	3500749	3499943	507	3500243	G	C	GCC->A	GCG->A	synonymous	hypothetical protein Rv3134c
Rv3137	3503393	3504175	503	3503895	C	T	CCG->P	CTG->L	non-synonymous	monophosphatase
Rv3141	3508095	3509066	876	3508970	A	G	GAA->E	GAG->E	synonymous	NADPH quinone oxidoreductase
Rv3144c	3511317	3510088	1198	3510120	T	G	AAG->K	CAG->Q	non-synonymous	PPE family protein
Rv3144c	3511317	3510088	676	3510642	T	C	AGC->S	GGC->G	non-synonymous	PPE family protein
Rv3151	3516746	3519166	498	3517243	G	C	CTG->L	CTC->L	synonymous	NADH dehydrogenase subunit G
Rv3151	3516746	3519166	1422	3518167	A	G	ATA->I	ATG->M	non-synonymous	NADH dehydrogenase subunit G
Rv3151	3516746	3519166	1810	3518555	A	G	ACG->T	GCG->A	non-synonymous	NADH dehydrogenase subunit G
Rv3156	3522234	3524135	468	3522701	G	A	GCG->A	GCA->A	synonymous	NADH dehydrogenase subunit L
Rv3159c	3529163	3527391	97	3529067	G	C	CGT->R	GGT->G	non-synonymous	PPE family protein
Rv3161c	3531138	3529990	184	3530955	C	G	GTC->V	CTC->L	non-synonymous	dioxygenase
Rv3167c	3536057	3535431	486	3535572	C	A	TTG->L	TTT->F	non-synonymous	TetR family transcriptional regulator
Rv3174	3542138	3542845	82	3542219	G	A	GGT->G	AGT->S	non-synonymous	short chain dehydrogenase
Rv3183	3550715	3551044	75	3550789	C	G	GCC->A	GCG->A	synonymous	transcriptional regulatory protein
Rv3190c	3556687	3555422	413	3556275	A	G	CTG->L	CCG->P	non-synonymous	hypothetical protein Rv3190c
Rv3199c	3572543	3571602	716	3571828	G	C	CCG->P	CGG->R	non-synonymous	NADH pyrophosphatase
Rv3201c	3577036	3573731	806	3576231	T	C	CAG->Q	CGG->R	non-synonymous	ATP-dependent DNA helicase
Rv3202c	3580200	3577033	2704	3577497	C	T	GAA->E	AAA->K	non-synonymous	ATP-dependent DNA helicase
Rv3204	3581315	3581620	100	3581414	A	G	ACA->T	GCA->A	non-synonymous	DNA-methyltransferase (modification methylase)
Rv3210c	3587539	3586844	94	3587446	G	A	CTG->L	TTG->L	synonymous	hypothetical protein Rv3210c
Rv3213c	3591492	3590692	430	3591063	T	C	AAG->K	GAG->E	non-synonymous	SOJ/PARA-like protein
Rv3220c	3597534	3596029	286	3597249	C	G	GGC->G	CGC->R	non-synonymous	two component sensor kinase
Rv3224	3599851	3600699	726	3600576	C	T	TGC->C	TGT->C	synonymous	short chain dehydrogenase
Rv3228	3604726	3605718	96	3604821	G	C	GCG->A	GCC->A	synonymous	hypothetical protein Rv3228
Rv3236c	3613116	3611959	304	3612813	T	C	ACG->T	GCG->A	non-synonymous	integral membrane transport protein
Rv3239c	3617603	3614457	2622	3614982	T	C	CTA->L	CTG->L	synonymous	transmembrane transport protein
Rv3243c	3623091	3622249	651	3622441	A	C	GTT->V	GTG->V	synonymous	hypothetical protein Rv3243c
Rv3245c	3626613	3624910	1549	3625065	T	G	ATG->M	CTG->L	non-synonymous	two component sensory transduction histidine kinase MTRB
Rv3245c	3626613	3624910	52	3626562	G	A	CCG->P	TCG->S	non-synonymous	two component sensory transduction histidine kinase MTRB
Rv3248c	3629647	3628160	1128	3628520	G	A	TCC->S	TCT->S	synonymous	S-adenosyl-L-homocysteine hydrolase
Rv3257c	3638709	3637312	617	3638093	G	A	TCG->S	TTG->L	non-synonymous	phosphomannomutase/phosphoglucomutase
Rv3263	3643177	3644838	809	3643985	A	C	GAG->E	GCG->A	non-synonymous	DNA methylase (modification methylase) (methyltransferase)
Rv3272	3653448	3654632	541	3653988	G	A	GTG->V	ATG->M	non-synonymous	hypothetical protein Rv3272
Rv3282	3664219	3664887	239	3664457	C	A	GCC->A	GAC->D	non-synonymous	Maf-like protein
Rv3283	3664928	3665821	826	3665753	G	A	GAG->E	AAG->K	non-synonymous	thiosulfate sulfurtransferase SseA
Rv3286c	3668954	3668169	782	3668173	T	C	GAG->E	GGG->G	non-synonymous	RNA polymerase sigma factor SigF
Rv3289c	3670411	3670034	372	3670040	C	T	GCG->A	GCA->A	synonymous	transmembrane protein
Rv3293	3673602	3675086	556	3674157	T	A	TGC->C	AGC->S	non-synonymous	piperideine-6-carboxilic acid dehydrogenase
Rv3294c	3675995	3675186	492	3675504	G	T	ATC->I	ATA->I	synonymous	hypothetical protein Rv3294c
Rv3296	3676775	3681316	1475	3678249	A	C	AAG->K	ACG->T	non-synonymous	ATP-dependent helicase
Rv3296	3676775	3681316	4158	3680932	G	A	CCG->P	CCA->P	synonymous	ATP-dependent helicase
Rv3297	3681320	3682087	229	3681548	A	C	AGG->R	CGG->R	synonymous	endonuclease VIII
Rv3303c	3690938	3689457	1416	3689523	G	T	TGC->C	TGA->*	non-synonymous	flavoprotein disulfide reductase
Rv3303c	3690938	3689457	923	3690016	A	G	TTG->L	TCG->S	non-synonymous	flavoprotein disulfide reductase
Rv3306c	3693989	3692805	309	3693681	A	C	GCT->A	GCG->A	synonymous	amidohydrolase AmiB1
Rv3317	3704437	3704871	160	3704596	G	C	GTG->V	CTG->L	non-synonymous	succinate dehydrogenase hydrophobic membrane anchor subunit SdhD
Rv3317	3704437	3704871	334	3704770	A	G	ACC->T	GCC->A	non-synonymous	succinate dehydrogenase hydrophobic membrane anchor subunit SdhD
Rv3327	3711749	3713461	162	3711910	G	A	TGG->W	TGA->*	non-synonymous	transposase
Rv3327	3711749	3713461	624	3712372	A	G	CTA->L	CTG->L	synonymous	transposase
Rv3328c	3714332	3713394	122	3714211	G	T	CCG->P	CAG->Q	non-synonymous	RNA polymerase sigma factor SigJ
Rv3329	3714392	3715708	366	3714757	A	C	CAA->Q	CAC->H	non-synonymous	hypothetical protein Rv3329
Rv3331	3717090	3718598	1268	3718357	C	T	CCG->P	CTG->L	non-synonymous	sugar-transport integral membrane protein SugI
Rv3335c	3722600	3721731	795	3721806	G	C	GGC->G	GGG->G	synonymous	integral membrane protein
Rv3343c	3736935	3729364	6320	3730616	G	A	GCC->A	GTC->V	non-synonymous	PPE family protein
Rv3343c	3736935	3729364	6294	3730642	G	A	AAC->N	AAT->N	synonymous	PPE family protein
Rv3343c	3736935	3729364	5475	3731461	C	G	ACG->T	ACC->T	synonymous	PPE family protein
Rv3343c	3736935	3729364	5471	3731465	C	A	AGC->S	ATC->I	non-synonymous	PPE family protein
Rv3343c	3736935	3729364	5470	3731466	T	G	AGC->S	CGC->R	non-synonymous	PPE family protein
Rv3343c	3736935	3729364	5467	3731469	G	C	CAC->H	GAC->D	non-synonymous	PPE family protein
Rv3343c	3736935	3729364	5465	3731471	G	A	GCC->A	GTC->V	non-synonymous	PPE family protein
Rv3343c	3736935	3729364	5464	3731472	C	G	GCC->A	CCC->P	non-synonymous	PPE family protein
Rv3343c	3736935	3729364	5463	3731473	C	G	GTG->V	GTC->V	synonymous	PPE family protein
Rv3343c	3736935	3729364	5462	3731474	A	T	GTG->V	GAG->E	non-synonymous	PPE family protein
Rv3343c	3736935	3729364	5461	3731475	C	T	GTG->V	ATG->M	non-synonymous	PPE family protein
Rv3343c	3736935	3729364	5457	3731479	G	C	GAC->D	GAG->E	non-synonymous	PPE family protein
Rv3343c	3736935	3729364	5455	3731481	C	G	GAC->D	CAC->H	non-synonymous	PPE family protein
Rv3343c	3736935	3729364	5454	3731482	A	C	TTT->F	TTG->L	non-synonymous	PPE family protein
Rv3343c	3736935	3729364	5452	3731484	A	G	TTT->F	CTT->L	non-synonymous	PPE family protein
Rv3343c	3736935	3729364	5451	3731485	G	C	CCC->P	CCG->P	synonymous	PPE family protein
Rv3343c	3736935	3729364	5448	3731488	G	A	ATC->I	ATT->I	synonymous	PPE family protein
Rv3343c	3736935	3729364	5444	3731492	T	G	GAA->E	GCA->A	non-synonymous	PPE family protein
Rv3343c	3736935	3729364	5443	3731493	C	G	GAA->E	CAA->Q	non-synonymous	PPE family protein
Rv3343c	3736935	3729364	5441	3731495	C	T	GGC->G	GAC->D	non-synonymous	PPE family protein
Rv3343c	3736935	3729364	5436	3731500	G	C	ACC->T	ACG->T	synonymous	PPE family protein
Rv3343c	3736935	3729364	5430	3731506	T	A	GCA->A	GCT->A	synonymous	PPE family protein
Rv3343c	3736935	3729364	5425	3731511	G	A	CCG->P	TCG->S	non-synonymous	PPE family protein
Rv3343c	3736935	3729364	5424	3731512	A	G	ATT->I	ATC->I	synonymous	PPE family protein
Rv3343c	3736935	3729364	5416	3731520	C	A	GTC->V	TTC->F	non-synonymous	PPE family protein
Rv3343c	3736935	3729364	5414	3731522	G	T	GCC->A	GAC->D	non-synonymous	PPE family protein
Rv3343c	3736935	3729364	5412	3731524	G	C	GGC->G	GGG->G	synonymous	PPE family protein
Rv3343c	3736935	3729364	5411	3731525	C	G	GGC->G	GCC->A	non-synonymous	PPE family protein
Rv3343c	3736935	3729364	5410	3731526	C	G	GGC->G	CGC->R	non-synonymous	PPE family protein
Rv3343c	3736935	3729364	5408	3731528	G	A	ACC->T	ATC->I	non-synonymous	PPE family protein
Rv3343c	3736935	3729364	5403	3731533	A	G	GGT->G	GGC->G	synonymous	PPE family protein
Rv3343c	3736935	3729364	5402	3731534	C	G	GGT->G	GCT->A	non-synonymous	PPE family protein
Rv3343c	3736935	3729364	5399	3731537	G	A	TCC->S	TTC->F	non-synonymous	PPE family protein
Rv3343c	3736935	3729364	5397	3731539	C	G	CTG->L	CTC->L	synonymous	PPE family protein
Rv3343c	3736935	3729364	5396	3731540	A	G	CTG->L	CCG->P	non-synonymous	PPE family protein
Rv3343c	3736935	3729364	5395	3731541	G	C	CTG->L	GTG->V	non-synonymous	PPE family protein
Rv3343c	3736935	3729364	5394	3731542	G	A	AAC->N	AAT->N	synonymous	PPE family protein
Rv3343c	3736935	3729364	5392	3731544	T	C	AAC->N	GAC->D	non-synonymous	PPE family protein
Rv3343c	3736935	3729364	5389	3731547	T	C	ATC->I	GTC->V	non-synonymous	PPE family protein
Rv3343c	3736935	3729364	5388	3731548	G	A	AGC->S	AGT->S	synonymous	PPE family protein
Rv3343c	3736935	3729364	5387	3731549	C	T	AGC->S	AAC->N	non-synonymous	PPE family protein
Rv3343c	3736935	3729364	5386	3731550	T	G	AGC->S	CGC->R	non-synonymous	PPE family protein
Rv3343c	3736935	3729364	5383	3731553	G	C	CTG->L	GTG->V	non-synonymous	PPE family protein
Rv3343c	3736935	3729364	5378	3731558	T	A	AAC->N	ATC->I	non-synonymous	PPE family protein
Rv3343c	3736935	3729364	5376	3731560	C	T	ATG->M	ATA->I	non-synonymous	PPE family protein
Rv3343c	3736935	3729364	5375	3731561	A	T	ATG->M	AAG->K	non-synonymous	PPE family protein
Rv3343c	3736935	3729364	5365	3731571	T	A	ATC->I	TTC->F	non-synonymous	PPE family protein
Rv3343c	3736935	3729364	5364	3731572	C	G	ACG->T	ACC->T	synonymous	PPE family protein
Rv3343c	3736935	3729364	5354	3731582	C	T	GGC->G	GAC->D	non-synonymous	PPE family protein
Rv3343c	3736935	3729364	5344	3731592	T	G	ATC->I	CTC->L	non-synonymous	PPE family protein
Rv3343c	3736935	3729364	5342	3731594	T	G	GAC->D	GCC->A	non-synonymous	PPE family protein
Rv3343c	3736935	3729364	5341	3731595	C	T	GAC->D	AAC->N	non-synonymous	PPE family protein
Rv3343c	3736935	3729364	5338	3731598	C	A	GTC->V	TTC->F	non-synonymous	PPE family protein
Rv3343c	3736935	3729364	5337	3731599	G	A	CCC->P	CCT->P	synonymous	PPE family protein
Rv3343c	3736935	3729364	5336	3731600	G	C	CCC->P	CGC->R	non-synonymous	PPE family protein
Rv3343c	3736935	3729364	5335	3731601	G	C	CCC->P	GCC->A	non-synonymous	PPE family protein
Rv3343c	3736935	3729364	5333	3731603	T	G	GAG->E	GCG->A	non-synonymous	PPE family protein
Rv3343c	3736935	3729364	5332	3731604	C	G	GAG->E	CAG->Q	non-synonymous	PPE family protein
Rv3343c	3736935	3729364	5330	3731606	C	A	AGC->S	ATC->I	non-synonymous	PPE family protein
Rv3343c	3736935	3729364	5327	3731609	T	C	CAC->H	CGC->R	non-synonymous	PPE family protein
Rv3343c	3736935	3729364	5326	3731610	G	C	CAC->H	GAC->D	non-synonymous	PPE family protein
Rv3343c	3736935	3729364	5321	3731615	G	T	ACC->T	AAC->N	non-synonymous	PPE family protein
Rv3343c	3736935	3729364	5320	3731616	T	C	ACC->T	GCC->A	non-synonymous	PPE family protein
Rv3343c	3736935	3729364	5319	3731617	A	C	ATT->I	ATG->M	non-synonymous	PPE family protein
Rv3343c	3736935	3729364	5317	3731619	T	C	ATT->I	GTT->V	non-synonymous	PPE family protein
Rv3343c	3736935	3729364	5316	3731620	G	A	AGC->S	AGT->S	synonymous	PPE family protein
Rv3343c	3736935	3729364	5315	3731621	C	T	AGC->S	AAC->N	non-synonymous	PPE family protein
Rv3343c	3736935	3729364	5314	3731622	T	C	AGC->S	GGC->G	non-synonymous	PPE family protein
Rv3343c	3736935	3729364	5312	3731624	G	A	GCC->A	GTC->V	non-synonymous	PPE family protein
Rv3343c	3736935	3729364	5311	3731625	C	T	GCC->A	ACC->T	non-synonymous	PPE family protein
Rv3343c	3736935	3729364	5310	3731626	C	G	CTG->L	CTC->L	synonymous	PPE family protein
Rv3343c	3736935	3729364	5309	3731627	A	C	CTG->L	CGG->R	non-synonymous	PPE family protein
Rv3343c	3736935	3729364	5304	3731632	C	G	CCG->P	CCC->P	synonymous	PPE family protein
Rv3343c	3736935	3729364	5301	3731635	G	C	ATC->I	ATG->M	non-synonymous	PPE family protein
Rv3343c	3736935	3729364	5299	3731637	T	C	ATC->I	GTC->V	non-synonymous	PPE family protein
Rv3343c	3736935	3729364	5297	3731639	T	G	GAG->E	GCG->A	non-synonymous	PPE family protein
Rv3343c	3736935	3729364	5296	3731640	C	A	GAG->E	TAG->*	non-synonymous	PPE family protein
Rv3343c	3736935	3729364	5295	3731641	G	T	GAC->D	GAA->E	non-synonymous	PPE family protein
Rv3343c	3736935	3729364	5294	3731642	T	G	GAC->D	GCC->A	non-synonymous	PPE family protein
Rv3343c	3736935	3729364	5293	3731643	C	G	GAC->D	CAC->H	non-synonymous	PPE family protein
Rv3343c	3736935	3729364	5286	3731650	G	C	GTC->V	GTG->V	synonymous	PPE family protein
Rv3343c	3736935	3729364	5284	3731652	C	G	GTC->V	CTC->L	non-synonymous	PPE family protein
Rv3343c	3736935	3729364	5283	3731653	G	C	GTC->V	GTG->V	synonymous	PPE family protein
Rv3343c	3736935	3729364	5282	3731654	A	C	GTC->V	GGC->G	non-synonymous	PPE family protein
Rv3343c	3736935	3729364	5280	3731656	G	C	CCC->P	CCG->P	synonymous	PPE family protein
Rv3343c	3736935	3729364	5277	3731659	G	A	ACC->T	ACT->T	synonymous	PPE family protein
Rv3343c	3736935	3729364	5276	3731660	G	A	ACC->T	ATC->I	non-synonymous	PPE family protein
Rv3343c	3736935	3729364	5273	3731663	C	T	AGC->S	AAC->N	non-synonymous	PPE family protein
Rv3343c	3736935	3729364	5272	3731664	T	G	AGC->S	CGC->R	non-synonymous	PPE family protein
Rv3343c	3736935	3729364	5269	3731667	A	T	TTC->F	ATC->I	non-synonymous	PPE family protein
Rv3343c	3736935	3729364	5268	3731668	C	G	CCG->P	CCC->P	synonymous	PPE family protein
Rv3343c	3736935	3729364	5264	3731672	A	G	CTG->L	CCG->P	non-synonymous	PPE family protein
Rv3343c	3736935	3729364	5261	3731675	T	A	AAC->N	ATC->I	non-synonymous	PPE family protein
Rv3343c	3736935	3729364	5258	3731678	G	C	GCC->A	GGC->G	non-synonymous	PPE family protein
Rv3343c	3736935	3729364	5257	3731679	C	T	GCC->A	ACC->T	non-synonymous	PPE family protein
Rv3343c	3736935	3729364	5214	3731722	G	T	GTC->V	GTA->V	synonymous	PPE family protein
Rv3343c	3736935	3729364	5211	3731725	T	G	ATA->I	ATC->I	synonymous	PPE family protein
Rv3343c	3736935	3729364	5210	3731726	A	T	ATA->I	AAA->K	non-synonymous	PPE family protein
Rv3343c	3736935	3729364	5208	3731728	C	G	CAG->Q	CAC->H	non-synonymous	PPE family protein
Rv3343c	3736935	3729364	5206	3731730	G	T	CAG->Q	AAG->K	non-synonymous	PPE family protein
Rv3343c	3736935	3729364	5205	3731731	G	A	AGC->S	AGT->S	synonymous	PPE family protein
Rv3343c	3736935	3729364	5203	3731733	T	C	AGC->S	GGC->G	non-synonymous	PPE family protein
Rv3343c	3736935	3729364	5202	3731734	T	G	TTA->L	TTC->F	non-synonymous	PPE family protein
Rv3343c	3736935	3729364	5201	3731735	A	G	TTA->L	TCA->S	non-synonymous	PPE family protein
Rv3343c	3736935	3729364	5200	3731736	A	T	TTA->L	ATA->I	non-synonymous	PPE family protein
Rv3343c	3736935	3729364	5196	3731740	C	G	CTG->L	CTC->L	synonymous	PPE family protein
Rv3343c	3736935	3729364	5194	3731742	G	A	CTG->L	TTG->L	synonymous	PPE family protein
Rv3343c	3736935	3729364	5192	3731744	G	T	CCC->P	CAC->H	non-synonymous	PPE family protein
Rv3343c	3736935	3729364	5191	3731745	G	C	CCC->P	GCC->A	non-synonymous	PPE family protein
Rv3343c	3736935	3729364	5189	3731747	G	A	ACC->T	ATC->I	non-synonymous	PPE family protein
Rv3343c	3736935	3729364	5188	3731748	T	C	ACC->T	GCC->A	non-synonymous	PPE family protein
Rv3343c	3736935	3729364	5187	3731749	A	G	CTT->L	CTC->L	synonymous	PPE family protein
Rv3343c	3736935	3729364	5186	3731750	A	G	CTT->L	CCT->P	non-synonymous	PPE family protein
Rv3343c	3736935	3729364	5185	3731751	G	T	CTT->L	ATT->I	non-synonymous	PPE family protein
Rv3343c	3736935	3729364	5183	3731753	C	G	GGC->G	GCC->A	non-synonymous	PPE family protein
Rv3343c	3736935	3729364	5182	3731754	C	A	GGC->G	TGC->C	non-synonymous	PPE family protein
Rv3343c	3736935	3729364	5178	3731758	G	A	CCC->P	CCT->P	synonymous	PPE family protein
Rv3343c	3736935	3729364	5177	3731759	G	A	CCC->P	CTC->L	non-synonymous	PPE family protein
Rv3343c	3736935	3729364	5176	3731760	G	A	CCC->P	TCC->S	non-synonymous	PPE family protein
Rv3343c	3736935	3729364	5175	3731761	G	C	ACC->T	ACG->T	synonymous	PPE family protein
Rv3343c	3736935	3729364	5174	3731762	G	A	ACC->T	ATC->I	non-synonymous	PPE family protein
Rv3343c	3736935	3729364	5173	3731763	T	C	ACC->T	GCC->A	non-synonymous	PPE family protein
Rv3343c	3736935	3729364	5172	3731764	G	A	AAC->N	AAT->N	synonymous	PPE family protein
Rv3343c	3736935	3729364	5168	3731768	A	G	TTC->F	TCC->S	non-synonymous	PPE family protein
Rv3343c	3736935	3729364	5166	3731770	G	C	CTC->L	CTG->L	synonymous	PPE family protein
Rv3343c	3736935	3729364	5165	3731771	A	G	CTC->L	CCC->P	non-synonymous	PPE family protein
Rv3343c	3736935	3729364	5164	3731772	G	T	CTC->L	ATC->I	non-synonymous	PPE family protein
Rv3343c	3736935	3729364	5162	3731774	C	G	GGA->G	GCA->A	non-synonymous	PPE family protein
Rv3343c	3736935	3729364	5158	3731778	T	G	ACG->T	CCG->P	non-synonymous	PPE family protein
Rv3343c	3736935	3729364	5152	3731784	G	A	CCG->P	TCG->S	non-synonymous	PPE family protein
Rv3343c	3736935	3729364	5147	3731789	A	G	ATC->I	ACC->T	non-synonymous	PPE family protein
Rv3343c	3736935	3729364	5145	3731791	T	G	AAA->K	AAC->N	non-synonymous	PPE family protein
Rv3343c	3736935	3729364	5144	3731792	T	G	AAA->K	ACA->T	non-synonymous	PPE family protein
Rv3343c	3736935	3729364	5142	3731794	C	G	CTG->L	CTC->L	synonymous	PPE family protein
Rv3343c	3736935	3729364	5141	3731795	A	C	CTG->L	CGG->R	non-synonymous	PPE family protein
Rv3343c	3736935	3729364	5133	3731803	G	A	GGC->G	GGT->G	synonymous	PPE family protein
Rv3343c	3736935	3729364	5127	3731809	T	G	CAA->Q	CAC->H	non-synonymous	PPE family protein
Rv3343c	3736935	3729364	5126	3731810	T	G	CAA->Q	CCA->P	non-synonymous	PPE family protein
Rv3343c	3736935	3729364	5125	3731811	G	C	CAA->Q	GAA->E	non-synonymous	PPE family protein
Rv3343c	3736935	3729364	5122	3731814	A	T	TCA->S	ACA->T	non-synonymous	PPE family protein
Rv3343c	3736935	3729364	5120	3731816	C	G	GGC->G	GCC->A	non-synonymous	PPE family protein
Rv3343c	3736935	3729364	5119	3731817	C	A	GGC->G	TGC->C	non-synonymous	PPE family protein
Rv3343c	3736935	3729364	5118	3731818	A	G	TTT->F	TTC->F	synonymous	PPE family protein
Rv3343c	3736935	3729364	5114	3731822	A	G	TTG->L	TCG->S	non-synonymous	PPE family protein
Rv3343c	3736935	3729364	5112	3731824	G	C	TAC->Y	TAG->*	non-synonymous	PPE family protein
Rv3343c	3736935	3729364	5110	3731826	A	C	TAC->Y	GAC->D	non-synonymous	PPE family protein
Rv3343c	3736935	3729364	5109	3731827	A	G	AAT->N	AAC->N	synonymous	PPE family protein
Rv3343c	3736935	3729364	5108	3731828	T	A	AAT->N	ATT->I	non-synonymous	PPE family protein
Rv3343c	3736935	3729364	5106	3731830	C	G	CTG->L	CTC->L	synonymous	PPE family protein
Rv3343c	3736935	3729364	5104	3731832	G	C	CTG->L	GTG->V	non-synonymous	PPE family protein
Rv3343c	3736935	3729364	5099	3731837	A	G	GTC->V	GCC->A	non-synonymous	PPE family protein
Rv3343c	3736935	3729364	5082	3731854	A	G	GAT->D	GAC->D	synonymous	PPE family protein
Rv3343c	3736935	3729364	5080	3731856	C	T	GAT->D	AAT->N	non-synonymous	PPE family protein
Rv3343c	3736935	3729364	5079	3731857	G	C	CTC->L	CTG->L	synonymous	PPE family protein
Rv3343c	3736935	3729364	5077	3731859	G	T	CTC->L	ATC->I	non-synonymous	PPE family protein
Rv3343c	3736935	3729364	5076	3731860	G	C	CAC->H	CAG->Q	non-synonymous	PPE family protein
Rv3343c	3736935	3729364	5075	3731861	T	G	CAC->H	CCC->P	non-synonymous	PPE family protein
Rv3343c	3736935	3729364	5068	3731868	C	A	GTC->V	TTC->F	non-synonymous	PPE family protein
Rv3343c	3736935	3729364	5066	3731870	G	A	ACC->T	ATC->I	non-synonymous	PPE family protein
Rv3343c	3736935	3729364	5062	3731874	T	C	ATC->I	GTC->V	non-synonymous	PPE family protein
Rv3343c	3736935	3729364	5055	3731881	G	C	CTC->L	CTG->L	synonymous	PPE family protein
Rv3343c	3736935	3729364	5051	3731885	C	T	GGC->G	GAC->D	non-synonymous	PPE family protein
Rv3343c	3736935	3729364	5047	3731889	C	A	GTC->V	TTC->F	non-synonymous	PPE family protein
Rv3343c	3736935	3729364	5045	3731891	C	G	AGC->S	ACC->T	non-synonymous	PPE family protein
Rv3343c	3736935	3729364	5043	3731893	G	T	GTC->V	GTA->V	synonymous	PPE family protein
Rv3343c	3736935	3729364	5041	3731895	C	T	GTC->V	ATC->I	non-synonymous	PPE family protein
Rv3343c	3736935	3729364	5034	3731902	G	A	GCC->A	GCT->A	synonymous	PPE family protein
Rv3343c	3736935	3729364	5033	3731903	G	A	GCC->A	GTC->V	non-synonymous	PPE family protein
Rv3343c	3736935	3729364	5032	3731904	C	T	GCC->A	ACC->T	non-synonymous	PPE family protein
Rv3343c	3736935	3729364	5026	3731910	G	A	CTG->L	TTG->L	synonymous	PPE family protein
Rv3343c	3736935	3729364	5024	3731912	T	G	GAC->D	GCC->A	non-synonymous	PPE family protein
Rv3343c	3736935	3729364	5018	3731918	T	G	CAG->Q	CCG->P	non-synonymous	PPE family protein
Rv3343c	3736935	3729364	5016	3731920	G	C	CCC->P	CCG->P	synonymous	PPE family protein
Rv3343c	3736935	3729364	5014	3731922	G	C	CCC->P	GCC->A	non-synonymous	PPE family protein
Rv3343c	3736935	3729364	5011	3731925	T	C	ATT->I	GTT->V	non-synonymous	PPE family protein
Rv3343c	3736935	3729364	5010	3731926	C	G	CCG->P	CCC->P	synonymous	PPE family protein
Rv3343c	3736935	3729364	5008	3731928	G	T	CCG->P	ACG->T	non-synonymous	PPE family protein
Rv3343c	3736935	3729364	5007	3731929	G	A	ATC->I	ATT->I	synonymous	PPE family protein
Rv3343c	3736935	3729364	5004	3731932	G	C	AGC->S	AGG->R	non-synonymous	PPE family protein
Rv3343c	3736935	3729364	5003	3731933	C	G	AGC->S	ACC->T	non-synonymous	PPE family protein
Rv3343c	3736935	3729364	5002	3731934	T	G	AGC->S	CGC->R	non-synonymous	PPE family protein
Rv3343c	3736935	3729364	5001	3731935	C	T	CCG->P	CCA->P	synonymous	PPE family protein
Rv3343c	3736935	3729364	4999	3731937	G	C	CCG->P	GCG->A	non-synonymous	PPE family protein
Rv3343c	3736935	3729364	4995	3731941	A	G	ACT->T	ACC->T	synonymous	PPE family protein
Rv3343c	3736935	3729364	4992	3731944	G	A	TTC->F	TTT->F	synonymous	PPE family protein
Rv3343c	3736935	3729364	4987	3731949	T	C	AGC->S	GGC->G	non-synonymous	PPE family protein
Rv3343c	3736935	3729364	4978	3731958	C	T	GCC->A	ACC->T	non-synonymous	PPE family protein
Rv3343c	3736935	3729364	4977	3731959	G	T	GTC->V	GTA->V	synonymous	PPE family protein
Rv3343c	3736935	3729364	4976	3731960	A	T	GTC->V	GAC->D	non-synonymous	PPE family protein
Rv3343c	3736935	3729364	4975	3731961	C	G	GTC->V	CTC->L	non-synonymous	PPE family protein
Rv3343c	3736935	3729364	4972	3731964	T	C	AAC->N	GAC->D	non-synonymous	PPE family protein
Rv3343c	3736935	3729364	4971	3731965	G	A	GCC->A	GCT->A	synonymous	PPE family protein
Rv3343c	3736935	3729364	4970	3731966	G	A	GCC->A	GTC->V	non-synonymous	PPE family protein
Rv3343c	3736935	3729364	4969	3731967	C	T	GCC->A	ACC->T	non-synonymous	PPE family protein
Rv3343c	3736935	3729364	4967	3731969	C	T	AGC->S	AAC->N	non-synonymous	PPE family protein
Rv3343c	3736935	3729364	4966	3731970	T	C	AGC->S	GGC->G	non-synonymous	PPE family protein
Rv3343c	3736935	3729364	4965	3731971	G	C	TTC->F	TTG->L	non-synonymous	PPE family protein
Rv3343c	3736935	3729364	4963	3731973	A	G	TTC->F	CTC->L	non-synonymous	PPE family protein
Rv3343c	3736935	3729364	4961	3731975	T	A	GAG->E	GTG->V	non-synonymous	PPE family protein
Rv3343c	3736935	3729364	4960	3731976	C	G	GAG->E	CAG->Q	non-synonymous	PPE family protein
Rv3343c	3736935	3729364	4959	3731977	G	C	CCC->P	CCG->P	synonymous	PPE family protein
Rv3343c	3736935	3729364	4955	3731981	C	G	CGC->R	CCC->P	non-synonymous	PPE family protein
Rv3343c	3736935	3729364	4946	3731990	G	T	CCC->P	CAC->H	non-synonymous	PPE family protein
Rv3343c	3736935	3729364	4942	3731994	T	C	ATT->I	GTT->V	non-synonymous	PPE family protein
Rv3343c	3736935	3729364	4939	3731997	C	G	GAC->D	CAC->H	non-synonymous	PPE family protein
Rv3343c	3736935	3729364	4938	3731998	G	A	ATC->I	ATT->I	synonymous	PPE family protein
Rv3343c	3736935	3729364	4935	3732001	G	C	GCC->A	GCG->A	synonymous	PPE family protein
Rv3343c	3736935	3729364	4933	3732003	C	G	GCC->A	CCC->P	non-synonymous	PPE family protein
Rv3343c	3736935	3729364	4932	3732004	G	A	CCC->P	CCT->P	synonymous	PPE family protein
Rv3343c	3736935	3729364	4931	3732005	G	T	CCC->P	CAC->H	non-synonymous	PPE family protein
Rv3343c	3736935	3729364	4930	3732006	G	C	CCC->P	GCC->A	non-synonymous	PPE family protein
Rv3343c	3736935	3729364	4926	3732010	A	G	GTT->V	GTC->V	synonymous	PPE family protein
Rv3343c	3736935	3729364	4925	3732011	A	T	GTT->V	GAT->D	non-synonymous	PPE family protein
Rv3343c	3736935	3729364	4924	3732012	C	G	GTT->V	CTT->L	non-synonymous	PPE family protein
Rv3343c	3736935	3729364	4921	3732015	C	T	GTC->V	ATC->I	non-synonymous	PPE family protein
Rv3343c	3736935	3729364	4918	3732018	A	G	TCC->S	CCC->P	non-synonymous	PPE family protein
Rv3343c	3736935	3729364	4911	3732025	T	G	GGA->G	GGC->G	synonymous	PPE family protein
Rv3343c	3736935	3729364	4910	3732026	C	T	GGA->G	GAA->E	non-synonymous	PPE family protein
Rv3343c	3736935	3729364	4909	3732027	C	T	GGA->G	AGA->R	non-synonymous	PPE family protein
Rv3343c	3736935	3729364	4908	3732028	G	C	GGC->G	GGG->G	synonymous	PPE family protein
Rv3343c	3736935	3729364	4907	3732029	C	A	GGC->G	GTC->V	non-synonymous	PPE family protein
Rv3343c	3736935	3729364	4902	3732034	G	T	CTC->L	CTA->L	synonymous	PPE family protein
Rv3343c	3736935	3729364	4901	3732035	A	T	CTC->L	CAC->H	non-synonymous	PPE family protein
Rv3343c	3736935	3729364	4900	3732036	G	C	CTC->L	GTC->V	non-synonymous	PPE family protein
Rv3343c	3736935	3729364	4898	3732038	G	C	ACC->T	AGC->S	non-synonymous	PPE family protein
Rv3343c	3736935	3729364	4897	3732039	T	G	ACC->T	CCC->P	non-synonymous	PPE family protein
Rv3343c	3736935	3729364	4893	3732043	G	A	GAC->D	GAT->D	synonymous	PPE family protein
Rv3343c	3736935	3729364	4891	3732045	C	G	GAC->D	CAC->H	non-synonymous	PPE family protein
Rv3343c	3736935	3729364	4888	3732048	G	C	CTG->L	GTG->V	non-synonymous	PPE family protein
Rv3343c	3736935	3729364	4885	3732051	A	G	TTC->F	CTC->L	non-synonymous	PPE family protein
Rv3343c	3736935	3729364	4884	3732052	C	G	CCG->P	CCC->P	synonymous	PPE family protein
Rv3343c	3736935	3729364	4883	3732053	G	T	CCG->P	CAG->Q	non-synonymous	PPE family protein
Rv3343c	3736935	3729364	4881	3732055	C	G	ACG->T	ACC->T	synonymous	PPE family protein
Rv3343c	3736935	3729364	4875	3732061	G	C	CCC->P	CCG->P	synonymous	PPE family protein
Rv3343c	3736935	3729364	4870	3732066	G	T	CTT->L	ATT->I	non-synonymous	PPE family protein
Rv3343c	3736935	3729364	4860	3732076	G	C	CGC->R	CGG->R	synonymous	PPE family protein
Rv3343c	3736935	3729364	4857	3732079	G	A	TAC->Y	TAT->Y	synonymous	PPE family protein
Rv3343c	3736935	3729364	4856	3732080	T	C	TAC->Y	TGC->C	non-synonymous	PPE family protein
Rv3343c	3736935	3729364	4855	3732081	A	C	TAC->Y	GAC->D	non-synonymous	PPE family protein
Rv3343c	3736935	3729364	4852	3732084	A	G	TCC->S	CCC->P	non-synonymous	PPE family protein
Rv3343c	3736935	3729364	4847	3732089	C	T	GGC->G	GAC->D	non-synonymous	PPE family protein
Rv3343c	3736935	3729364	4753	3732183	C	G	GTG->V	CTG->L	non-synonymous	PPE family protein
Rv3343c	3736935	3729364	4626	3732310	G	A	AAC->N	AAT->N	synonymous	PPE family protein
Rv3343c	3736935	3729364	4592	3732344	G	A	GCC->A	GTC->V	non-synonymous	PPE family protein
Rv3343c	3736935	3729364	4419	3732517	A	G	ATT->I	ATC->I	synonymous	PPE family protein
Rv3343c	3736935	3729364	4411	3732525	A	T	TTC->F	ATC->I	non-synonymous	PPE family protein
Rv3343c	3736935	3729364	4383	3732553	A	G	ATT->I	ATC->I	synonymous	PPE family protein
Rv3343c	3736935	3729364	4312	3732624	A	G	TTG->L	CTG->L	synonymous	PPE family protein
Rv3343c	3736935	3729364	1843	3735093	T	C	ATC->I	GTC->V	non-synonymous	PPE family protein
Rv3343c	3736935	3729364	1134	3735802	C	G	ACG->T	ACC->T	synonymous	PPE family protein
Rv3343c	3736935	3729364	912	3736024	A	G	GGT->G	GGC->G	synonymous	PPE family protein
Rv3343c	3736935	3729364	308	3736628	T	G	GAG->E	GCG->A	non-synonymous	PPE family protein
Rv3345c	3742774	3738158	1203	3741572	G	A	GGC->G	GGT->G	synonymous	PE-PGRS family protein
Rv3345c	3742774	3738158	1097	3741678	G	C	GCC->A	GGC->G	non-synonymous	PE-PGRS family protein
Rv3345c	3742774	3738158	1096	3741679	C	G	GCC->A	CCC->P	non-synonymous	PE-PGRS family protein
Rv3347c	3753184	3743711	9286	3743899	G	A	CTG->L	TTG->L	synonymous	PPE family protein
Rv3347c	3753184	3743711	6776	3746409	A	G	CTG->L	CCG->P	non-synonymous	PPE family protein
Rv3347c	3753184	3743711	3008	3750177	A	T	TTC->F	TAC->Y	non-synonymous	PPE family protein
Rv3347c	3753184	3743711	3007	3750178	A	C	TTC->F	GTC->V	non-synonymous	PPE family protein
Rv3347c	3753184	3743711	3000	3750185	C	G	TCG->S	TCC->S	synonymous	PPE family protein
Rv3347c	3753184	3743711	2998	3750187	A	T	TCG->S	ACG->T	non-synonymous	PPE family protein
Rv3347c	3753184	3743711	2997	3750188	C	G	ATG->M	ATC->I	non-synonymous	PPE family protein
Rv3347c	3753184	3743711	2992	3750193	G	A	CTC->L	TTC->F	non-synonymous	PPE family protein
Rv3347c	3753184	3743711	2980	3750205	C	T	GAC->D	AAC->N	non-synonymous	PPE family protein
Rv3347c	3753184	3743711	2976	3750209	A	G	AAT->N	AAC->N	synonymous	PPE family protein
Rv3347c	3753184	3743711	2975	3750210	T	G	AAT->N	ACT->T	non-synonymous	PPE family protein
Rv3347c	3753184	3743711	2778	3750407	G	C	GGC->G	GGG->G	synonymous	PPE family protein
Rv3347c	3753184	3743711	2768	3750417	A	T	TTC->F	TAC->Y	non-synonymous	PPE family protein
Rv3347c	3753184	3743711	2764	3750421	T	C	AGC->S	GGC->G	non-synonymous	PPE family protein
Rv3347c	3753184	3743711	978	3752207	A	G	ATT->I	ATC->I	synonymous	PPE family protein
Rv3347c	3753184	3743711	69	3753116	C	T	CCG->P	CCA->P	synonymous	PPE family protein
Rv3347c	3753184	3743711	21	3753164	T	G	CCA->P	CCC->P	synonymous	PPE family protein
Rv3349c	3755033	3754293	526	3754508	G	C	CTC->L	GTC->V	non-synonymous	transposase
Rv3350c	3767102	3755952	5912	3761191	A	G	GTC->V	GCC->A	non-synonymous	PPE family protein
Rv3350c	3767102	3755952	5090	3762013	A	C	CTC->L	CGC->R	non-synonymous	PPE family protein
Rv3353c	3768996	3768736	3	3768994	C	A	ATG->M	ATT->I	non-synonymous	hypothetical protein Rv3353c
Rv3365c	3777501	3774871	2093	3775409	T	C	CAG->Q	CGG->R	non-synonymous	hypothetical protein Rv3365c
Rv3365c	3777501	3774871	2061	3775441	A	C	AGT->S	AGG->R	non-synonymous	hypothetical protein Rv3365c
Rv3366	3777737	3778201	275	3778011	G	A	CGG->R	CAG->Q	non-synonymous	tRNA/rRNA methylase SpoU
Rv3366	3777737	3778201	276	3778012	G	T	CGG->R	CGT->R	synonymous	tRNA/rRNA methylase SpoU
Rv3383c	3798489	3797437	395	3798095	A	C	GTC->V	GGC->G	non-synonymous	polyprenyl synthetase IdsB
Rv3389c	3804791	3803919	493	3804299	G	A	CCC->P	TCC->S	non-synonymous	dehydrogenase
Rv3398c	3816106	3815027	630	3815477	G	T	GCC->A	GCA->A	synonymous	multifunctional dimethylallyltransferase/farnesyl diphosphate synthetase/ farnesyltranstransferase
Rv3399	3816129	3817175	989	3817117	C	A	GCG->A	GAG->E	non-synonymous	hypothetical protein Rv3399
Rv3402c	3821891	3820653	47	3821845	G	T	GCA->A	GAA->E	non-synonymous	hypothetical protein Rv3402c
Rv3403c	3823863	3822262	705	3823159	A	T	GTT->V	GTA->V	synonymous	hypothetical protein Rv3403c
Rv3407	3826252	3826551	250	3826501	C	T	CGC->R	TGC->C	non-synonymous	hypothetical protein Rv3407
Rv3408	3826548	3826958	137	3826684	C	T	TCG->S	TTG->L	non-synonymous	hypothetical protein Rv3408
Rv3410c	3829910	3828783	141	3829770	T	C	CCA->P	CCG->P	synonymous	inosine 5-monophosphate dehydrogenase
Rv3411c	3831519	3829930	1171	3830349	C	T	GCG->A	ACG->T	non-synonymous	inosine 5'-monophosphate dehydrogenase
Rv3411c	3831519	3829930	825	3830695	A	G	GCT->A	GCC->A	synonymous	inosine 5'-monophosphate dehydrogenase
Rv3415c	3834521	3833694	36	3834486	T	C	CAA->Q	CAG->Q	synonymous	hypothetical protein Rv3415c
Rv3420c	3839062	3838586	192	3838871	A	G	GCT->A	GCC->A	synonymous	ribosomal-protein-alanine acetyltransferase
Rv3424c	3842076	3841714	287	3841790	A	G	GTG->V	GCG->A	non-synonymous	hypothetical protein Rv3424c
Rv3424c	3842076	3841714	253	3841824	T	G	ATC->I	CTC->L	non-synonymous	hypothetical protein Rv3424c
Rv3424c	3842076	3841714	239	3841838	G	C	GCC->A	GGC->G	non-synonymous	hypothetical protein Rv3424c
Rv3425	3842239	3842769	382	3842620	A	G	ACT->T	GCT->A	non-synonymous	PPE family protein
Rv3425	3842239	3842769	387	3842625	A	G	CCA->P	CCG->P	synonymous	PPE family protein
Rv3429	3847165	3847701	51	3847215	T	C	GGT->G	GGC->G	synonymous	PPE family protein
Rv3429	3847165	3847701	57	3847221	T	C	GGT->G	GGC->G	synonymous	PPE family protein
Rv3429	3847165	3847701	71	3847235	C	T	TCT->S	TTT->F	non-synonymous	PPE family protein
Rv3429	3847165	3847701	73	3847237	G	T	GCC->A	TCC->S	non-synonymous	PPE family protein
Rv3429	3847165	3847701	74	3847238	C	T	GCC->A	GTC->V	non-synonymous	PPE family protein
Rv3433c	3853213	3851792	1327	3851887	A	C	TCG->S	GCG->A	non-synonymous	hypothetical protein Rv3433c
Rv3433c	3853213	3851792	1326	3851888	T	C	GCA->A	GCG->A	synonymous	hypothetical protein Rv3433c
Rv3440c	3859976	3859665	84	3859893	C	T	GAG->E	GAA->E	synonymous	hypothetical protein Rv3440c
Rv3445c	3863324	3862947	187	3863138	G	A	CCG->P	TCG->S	non-synonymous	ESAT-6 like protein ESXU
Rv3446c	3864531	3863317	851	3863681	C	G	CGG->R	CCG->P	non-synonymous	hypothetical protein Rv3446c
Rv3447c	3868238	3864528	3244	3864995	T	C	AGC->S	GGC->G	non-synonymous	hypothetical protein Rv3447c
Rv3449	3869752	3871119	259	3870010	A	G	ACC->T	GCC->A	non-synonymous	membrane-anchored mycosin
Rv3450c	3872496	3871084	1251	3871246	T	C	GGA->G	GGG->G	synonymous	hypothetical protein Rv3450c
Rv3456c	3877432	3876890	12	3877421	A	G	CCT->P	CCC->P	synonymous	50S ribosomal protein L17
Rv3465	3882834	3883442	345	3883178	A	C	GAA->E	GAC->D	non-synonymous	dTDP-4-dehydrorhamnose 3,5-epimerase RmlC
Rv3466	3883525	3884193	272	3883796	G	T	CGG->R	CTG->L	non-synonymous	hypothetical protein Rv3466
Rv3466	3883525	3884193	273	3883797	G	A	CGG->R	CGA->R	synonymous	hypothetical protein Rv3466
Rv3467	3883964	3884917	943	3884906	A	G	AAA->K	GAA->E	non-synonymous	hypothetical protein Rv3467
Rv3468c	3886069	3884975	184	3885886	T	C	ATC->I	GTC->V	non-synonymous	dTDP-glucose 4,6-dehydratase
Rv3473c	3890733	3889948	134	3890600	C	A	GGC->G	GTC->V	non-synonymous	peroxidase BpoA
Rv3476c	3893720	3892371	1050	3892671	A	G	GTT->V	GTC->V	synonymous	dicarboxylic acid transport integral membrane protein KgtP
Rv3476c	3893720	3892371	241	3893480	G	A	CTT->L	TTT->F	non-synonymous	dicarboxylic acid transport integral membrane protein KgtP
Rv3478	3894426	3895607	307	3894732	A	G	AGG->R	GGG->G	non-synonymous	PE family protein
Rv3478	3894426	3895607	1160	3895585	C	T	CCC->P	CTC->L	non-synonymous	PE family protein
Rv3479	3895820	3898885	521	3896340	T	G	CTC->L	CGC->R	non-synonymous	hypothetical protein Rv3479
Rv3479	3895820	3898885	2589	3898408	A	G	GCA->A	GCG->A	synonymous	hypothetical protein Rv3479
Rv3487c	3907007	3906174	697	3906311	G	A	CGT->R	TGT->C	non-synonymous	esterase/lipase LipF
Rv3490	3908236	3909738	55	3908290	G	A	GAC->D	AAC->N	non-synonymous	alpha,alpha-trehalose-phosphate synthase
Rv3490	3908236	3909738	230	3908465	A	G	GAA->E	GGA->G	non-synonymous	alpha,alpha-trehalose-phosphate synthase
Rv3490	3908236	3909738	1000	3909235	G	C	GTG->V	CTG->L	non-synonymous	alpha,alpha-trehalose-phosphate synthase
Rv3497c	3916956	3915883	571	3916386	G	T	CGT->R	AGT->S	non-synonymous	MCE-family protein MCE4C
Rv3508	3931005	3936710	457	3931461	C	G	CCT->P	GCT->A	non-synonymous	PE-PGRS family protein
Rv3508	3931005	3936710	3695	3934699	G	A	AGC->S	AAC->N	non-synonymous	PE-PGRS family protein
Rv3508	3931005	3936710	3729	3934733	G	C	GGG->G	GGC->G	synonymous	PE-PGRS family protein
Rv3508	3931005	3936710	3730	3934734	G	A	GCC->A	ACC->T	non-synonymous	PE-PGRS family protein
Rv3508	3931005	3936710	4331	3935335	T	C	GTC->V	GCC->A	non-synonymous	PE-PGRS family protein
Rv3508	3931005	3936710	4821	3935825	A	G	GGA->G	GGG->G	synonymous	PE-PGRS family protein
Rv3508	3931005	3936710	4822	3935826	A	G	ACC->T	GCC->A	non-synonymous	PE-PGRS family protein
Rv3508	3931005	3936710	4826	3935830	C	G	GCG->A	GGG->G	non-synonymous	PE-PGRS family protein
Rv3508	3931005	3936710	4831	3935835	A	G	AAC->N	GAC->D	non-synonymous	PE-PGRS family protein
Rv3508	3931005	3936710	4832	3935836	A	C	AAC->N	ACC->T	non-synonymous	PE-PGRS family protein
Rv3508	3931005	3936710	4835	3935839	C	G	GCC->A	GGC->G	non-synonymous	PE-PGRS family protein
Rv3508	3931005	3936710	4839	3935843	T	C	GGT->G	GGC->G	synonymous	PE-PGRS family protein
Rv3508	3931005	3936710	4840	3935844	A	G	ATC->I	GTC->V	non-synonymous	PE-PGRS family protein
Rv3508	3931005	3936710	4841	3935845	T	C	ATC->I	ACC->T	non-synonymous	PE-PGRS family protein
Rv3508	3931005	3936710	4847	3935851	G	C	GGG->G	GCG->A	non-synonymous	PE-PGRS family protein
Rv3508	3931005	3936710	4848	3935852	G	C	GGG->G	GGC->G	synonymous	PE-PGRS family protein
Rv3508	3931005	3936710	4850	3935854	C	A	GCC->A	GAC->D	non-synonymous	PE-PGRS family protein
Rv3508	3931005	3936710	4854	3935858	C	G	GGC->G	GGG->G	synonymous	PE-PGRS family protein
Rv3508	3931005	3936710	4856	3935860	G	A	GGC->G	GAC->D	non-synonymous	PE-PGRS family protein
Rv3508	3931005	3936710	4859	3935863	G	C	CGC->R	CCC->P	non-synonymous	PE-PGRS family protein
Rv3508	3931005	3936710	4861	3935865	G	A	GGC->G	AGC->S	non-synonymous	PE-PGRS family protein
Rv3508	3931005	3936710	4864	3935868	G	A	GGC->G	AGC->S	non-synonymous	PE-PGRS family protein
Rv3508	3931005	3936710	4865	3935869	G	T	GGC->G	GTC->V	non-synonymous	PE-PGRS family protein
Rv3508	3931005	3936710	4866	3935870	C	T	GGC->G	GGT->G	synonymous	PE-PGRS family protein
Rv3508	3931005	3936710	4875	3935879	G	T	GGG->G	GGT->G	synonymous	PE-PGRS family protein
Rv3508	3931005	3936710	4883	3935887	A	G	GAC->D	GGC->G	non-synonymous	PE-PGRS family protein
Rv3508	3931005	3936710	4885	3935889	A	C	AGC->S	CGC->R	non-synonymous	PE-PGRS family protein
Rv3508	3931005	3936710	4886	3935890	G	A	AGC->S	AAC->N	non-synonymous	PE-PGRS family protein
Rv3508	3931005	3936710	4898	3935902	C	G	TCC->S	TGC->C	non-synonymous	PE-PGRS family protein
Rv3508	3931005	3936710	4904	3935908	A	G	GAC->D	GGC->G	non-synonymous	PE-PGRS family protein
Rv3508	3931005	3936710	4915	3935919	T	C	TTC->F	CTC->L	non-synonymous	PE-PGRS family protein
Rv3508	3931005	3936710	4918	3935922	G	A	GCC->A	ACC->T	non-synonymous	PE-PGRS family protein
Rv3508	3931005	3936710	4923	3935927	C	T	GGC->G	GGT->G	synonymous	PE-PGRS family protein
Rv3508	3931005	3936710	4924	3935928	G	A	GGC->G	AGC->S	non-synonymous	PE-PGRS family protein
Rv3508	3931005	3936710	4929	3935933	A	G	CAA->Q	CAG->Q	synonymous	PE-PGRS family protein
Rv3508	3931005	3936710	4930	3935934	G	C	GGC->G	CGC->R	non-synonymous	PE-PGRS family protein
Rv3508	3931005	3936710	4933	3935937	G	C	GGC->G	CGC->R	non-synonymous	PE-PGRS family protein
Rv3508	3931005	3936710	4944	3935948	G	T	GGG->G	GGT->G	synonymous	PE-PGRS family protein
Rv3508	3931005	3936710	4946	3935950	T	A	GTC->V	GAC->D	non-synonymous	PE-PGRS family protein
Rv3508	3931005	3936710	4958	3935962	C	G	GCC->A	GGC->G	non-synonymous	PE-PGRS family protein
Rv3508	3931005	3936710	4962	3935966	C	G	GGC->G	GGG->G	synonymous	PE-PGRS family protein
Rv3508	3931005	3936710	5082	3936086	C	T	GGC->G	GGT->G	synonymous	PE-PGRS family protein
Rv3508	3931005	3936710	5085	3936089	C	G	GGC->G	GGG->G	synonymous	PE-PGRS family protein
Rv3508	3931005	3936710	5086	3936090	C	G	CAA->Q	GAA->E	non-synonymous	PE-PGRS family protein
Rv3508	3931005	3936710	5088	3936092	A	C	CAA->Q	CAC->H	non-synonymous	PE-PGRS family protein
Rv3508	3931005	3936710	5105	3936109	C	A	GCC->A	GAC->D	non-synonymous	PE-PGRS family protein
Rv3508	3931005	3936710	5106	3936110	C	A	GCC->A	GCA->A	synonymous	PE-PGRS family protein
Rv3508	3931005	3936710	5113	3936117	A	G	AAC->N	GAC->D	non-synonymous	PE-PGRS family protein
Rv3508	3931005	3936710	5114	3936118	A	G	AAC->N	AGC->S	non-synonymous	PE-PGRS family protein
Rv3508	3931005	3936710	5118	3936122	C	G	GCC->A	GCG->A	synonymous	PE-PGRS family protein
Rv3508	3931005	3936710	5128	3936132	G	A	GCC->A	ACC->T	non-synonymous	PE-PGRS family protein
Rv3508	3931005	3936710	5129	3936133	C	G	GCC->A	GGC->G	non-synonymous	PE-PGRS family protein
Rv3508	3931005	3936710	5133	3936137	T	C	GGT->G	GGC->G	synonymous	PE-PGRS family protein
Rv3508	3931005	3936710	5136	3936140	T	A	GTT->V	GTA->V	synonymous	PE-PGRS family protein
Rv3508	3931005	3936710	5137	3936141	C	G	CCC->P	GCC->A	non-synonymous	PE-PGRS family protein
Rv3508	3931005	3936710	5144	3936148	A	C	GAC->D	GCC->A	non-synonymous	PE-PGRS family protein
Rv3508	3931005	3936710	5147	3936151	G	C	GGC->G	GCC->A	non-synonymous	PE-PGRS family protein
Rv3508	3931005	3936710	5151	3936155	G	C	GGG->G	GGC->G	synonymous	PE-PGRS family protein
Rv3508	3931005	3936710	5152	3936156	A	G	ATC->I	GTC->V	non-synonymous	PE-PGRS family protein
Rv3508	3931005	3936710	5153	3936157	T	C	ATC->I	ACC->T	non-synonymous	PE-PGRS family protein
Rv3508	3931005	3936710	5162	3936166	C	A	ACC->T	AAC->N	non-synonymous	PE-PGRS family protein
Rv3508	3931005	3936710	5169	3936173	G	T	GGG->G	GGT->G	synonymous	PE-PGRS family protein
Rv3508	3931005	3936710	5170	3936174	G	A	GCC->A	ACC->T	non-synonymous	PE-PGRS family protein
Rv3508	3931005	3936710	5171	3936175	C	A	GCC->A	GAC->D	non-synonymous	PE-PGRS family protein
Rv3508	3931005	3936710	5172	3936176	C	G	GCC->A	GCG->A	synonymous	PE-PGRS family protein
Rv3508	3931005	3936710	5175	3936179	G	A	GGG->G	GGA->G	synonymous	PE-PGRS family protein
Rv3508	3931005	3936710	5178	3936182	C	T	GGC->G	GGT->G	synonymous	PE-PGRS family protein
Rv3508	3931005	3936710	5180	3936184	C	A	GCC->A	GAC->D	non-synonymous	PE-PGRS family protein
Rv3508	3931005	3936710	5187	3936191	C	G	GGC->G	GGG->G	synonymous	PE-PGRS family protein
Rv3508	3931005	3936710	5188	3936192	G	A	GCC->A	ACC->T	non-synonymous	PE-PGRS family protein
Rv3508	3931005	3936710	5198	3936202	A	G	GAC->D	GGC->G	non-synonymous	PE-PGRS family protein
Rv3508	3931005	3936710	5203	3936207	G	A	GAC->D	AAC->N	non-synonymous	PE-PGRS family protein
Rv3508	3931005	3936710	5208	3936212	C	T	CCC->P	CCT->P	synonymous	PE-PGRS family protein
Rv3508	3931005	3936710	5210	3936214	G	A	AGC->S	AAC->N	non-synonymous	PE-PGRS family protein
Rv3508	3931005	3936710	5212	3936216	A	T	ATT->I	TTT->F	non-synonymous	PE-PGRS family protein
Rv3508	3931005	3936710	5214	3936218	T	C	ATT->I	ATC->I	synonymous	PE-PGRS family protein
Rv3508	3931005	3936710	5216	3936220	A	C	GAC->D	GCC->A	non-synonymous	PE-PGRS family protein
Rv3508	3931005	3936710	5217	3936221	C	T	GAC->D	GAT->D	synonymous	PE-PGRS family protein
Rv3508	3931005	3936710	5229	3936233	T	C	GGT->G	GGC->G	synonymous	PE-PGRS family protein
Rv3508	3931005	3936710	5238	3936242	C	T	GGC->G	GGT->G	synonymous	PE-PGRS family protein
Rv3508	3931005	3936710	5243	3936247	A	G	CAC->H	CGC->R	non-synonymous	PE-PGRS family protein
Rv3508	3931005	3936710	5244	3936248	C	A	CAC->H	CAA->Q	non-synonymous	PE-PGRS family protein
Rv3508	3931005	3936710	5247	3936251	C	A	GGC->G	GGA->G	synonymous	PE-PGRS family protein
Rv3508	3931005	3936710	5250	3936254	C	T	GGC->G	GGT->G	synonymous	PE-PGRS family protein
Rv3508	3931005	3936710	5251	3936255	C	G	CAA->Q	GAA->E	non-synonymous	PE-PGRS family protein
Rv3508	3931005	3936710	5252	3936256	A	C	CAA->Q	CCA->P	non-synonymous	PE-PGRS family protein
Rv3508	3931005	3936710	5253	3936257	A	T	CAA->Q	CAT->H	non-synonymous	PE-PGRS family protein
Rv3508	3931005	3936710	5262	3936266	A	T	AAA->K	AAT->N	non-synonymous	PE-PGRS family protein
Rv3508	3931005	3936710	5300	3936304	G	A	AGC->S	AAC->N	non-synonymous	PE-PGRS family protein
Rv3508	3931005	3936710	5304	3936308	T	C	GGT->G	GGC->G	synonymous	PE-PGRS family protein
Rv3508	3931005	3936710	5306	3936310	A	T	GAC->D	GTC->V	non-synonymous	PE-PGRS family protein
Rv3508	3931005	3936710	5307	3936311	C	T	GAC->D	GAT->D	synonymous	PE-PGRS family protein
Rv3508	3931005	3936710	5312	3936316	G	A	GGC->G	GAC->D	non-synonymous	PE-PGRS family protein
Rv3508	3931005	3936710	5318	3936322	G	C	GGC->G	GCC->A	non-synonymous	PE-PGRS family protein
Rv3508	3931005	3936710	5328	3936332	C	G	GGC->G	GGG->G	synonymous	PE-PGRS family protein
Rv3508	3931005	3936710	5331	3936335	G	C	GGG->G	GGC->G	synonymous	PE-PGRS family protein
Rv3508	3931005	3936710	5333	3936337	C	A	GCC->A	GAC->D	non-synonymous	PE-PGRS family protein
Rv3508	3931005	3936710	5334	3936338	C	T	GCC->A	GCT->A	synonymous	PE-PGRS family protein
Rv3511	3939617	3941761	1186	3940802	A	G	AAC->N	GAC->D	non-synonymous	PE-PGRS family protein
Rv3512	3941724	3944963	111	3941834	G	C	GGG->G	GGC->G	synonymous	PE-PGRS family protein
Rv3512	3941724	3944963	113	3941836	C	A	GCC->A	GAC->D	non-synonymous	PE-PGRS family protein
Rv3512	3941724	3944963	758	3942481	C	G	GCG->A	GGG->G	non-synonymous	PE-PGRS family protein
Rv3512	3941724	3944963	917	3942640	T	C	ATT->I	ACT->T	non-synonymous	PE-PGRS family protein
Rv3512	3941724	3944963	1296	3943019	C	G	GCC->A	GCG->A	synonymous	PE-PGRS family protein
Rv3512	3941724	3944963	1412	3943135	C	G	ACC->T	AGC->S	non-synonymous	PE-PGRS family protein
Rv3512	3941724	3944963	1416	3943139	A	C	GGA->G	GGC->G	synonymous	PE-PGRS family protein
Rv3512	3941724	3944963	1421	3943144	A	C	GAC->D	GCC->A	non-synonymous	PE-PGRS family protein
Rv3512	3941724	3944963	1430	3943153	G	C	AGC->S	ACC->T	non-synonymous	PE-PGRS family protein
Rv3512	3941724	3944963	1434	3943157	C	A	GGC->G	GGA->G	synonymous	PE-PGRS family protein
Rv3512	3941724	3944963	1452	3943175	A	C	GGA->G	GGC->G	synonymous	PE-PGRS family protein
Rv3512	3941724	3944963	2139	3943862	C	G	GGC->G	GGG->G	synonymous	PE-PGRS family protein
Rv3514	3945794	3950263	231	3946024	G	A	GTG->V	GTA->V	synonymous	PE-PGRS family protein
Rv3514	3945794	3950263	356	3946149	G	A	GGC->G	GAC->D	non-synonymous	PE-PGRS family protein
Rv3514	3945794	3950263	460	3946253	G	C	GGC->G	CGC->R	non-synonymous	PE-PGRS family protein
Rv3514	3945794	3950263	545	3946338	G	A	GGT->G	GAT->D	non-synonymous	PE-PGRS family protein
Rv3514	3945794	3950263	629	3946422	T	C	TTG->L	TCG->S	non-synonymous	PE-PGRS family protein
Rv3514	3945794	3950263	852	3946645	G	A	GGG->G	GGA->G	synonymous	PE-PGRS family protein
Rv3514	3945794	3950263	1002	3946795	C	G	GGC->G	GGG->G	synonymous	PE-PGRS family protein
Rv3514	3945794	3950263	1004	3946797	C	T	ACC->T	ATC->I	non-synonymous	PE-PGRS family protein
Rv3514	3945794	3950263	1005	3946798	C	G	ACC->T	ACG->T	synonymous	PE-PGRS family protein
Rv3514	3945794	3950263	1008	3946801	C	G	GGC->G	GGG->G	synonymous	PE-PGRS family protein
Rv3514	3945794	3950263	1011	3946804	G	T	GGG->G	GGT->G	synonymous	PE-PGRS family protein
Rv3514	3945794	3950263	1014	3946807	C	T	GCC->A	GCT->A	synonymous	PE-PGRS family protein
Rv3514	3945794	3950263	1020	3946813	A	G	GGA->G	GGG->G	synonymous	PE-PGRS family protein
Rv3514	3945794	3950263	1022	3946815	A	C	GAT->D	GCT->A	non-synonymous	PE-PGRS family protein
Rv3514	3945794	3950263	1023	3946816	T	C	GAT->D	GAC->D	synonymous	PE-PGRS family protein
Rv3514	3945794	3950263	1028	3946821	T	C	GTT->V	GCT->A	non-synonymous	PE-PGRS family protein
Rv3514	3945794	3950263	1029	3946822	T	C	GTT->V	GTC->V	synonymous	PE-PGRS family protein
[truncated: 246 more rows]

## Sheet: Sheet2
Table S4-2. SNPs of M.tb 1458 based on M.bovis AF2122_97.
Gene name	Gene start	Gene End	SNP location	SNPcoord	Refbase	SNPbase	Ref codon	SNP codon	SNP Type	Annotation
Mb0001	1	1524	1057	1057	A	G	ATC->I	GTC->V	non-synonymous	chromosome replication initiator DnaA
Mb0001	1	1524	467	467	G	A	CGC->R	CAC->H	non-synonymous	chromosome replication initiator DnaA
Mb0002	2052	3260	296	2347	G	A	GGC->G	GAC->D	non-synonymous	DNA polymerase III subunit beta
Mb0002	2052	3260	481	2532	C	T	CTG->L	TTG->L	synonymous	DNA polymerase III subunit beta
Mb0003	3280	4437	472	3751	G	T	GTG->V	TTG->L	non-synonymous	recombination protein F
Mb0004	4434	4997	47	4480	T	C	TTA->L	TCA->S	non-synonymous	hypothetical protein
Mb0005	5123	7267	630	5752	A	G	GTA->V	GTG->V	synonymous	DNA gyrase subunit B
Mb0005	5123	7267	1284	6406	T	C	AAT->N	AAC->N	synonymous	DNA gyrase subunit B
Mb0005	5123	7267	1324	6446	T	G	TCG->S	GCG->A	non-synonymous	DNA gyrase subunit B
Mb0006	7302	9818	984	8285	T	C	ATT->I	ATC->I	synonymous	DNA gyrase subunit A
Mb0006	7302	9818	1440	8741	T	C	CGT->R	CGC->R	synonymous	DNA gyrase subunit A
Mb0006	7302	9818	1842	9143	C	T	ATC->I	ATT->I	synonymous	DNA gyrase subunit A
Mb0006	7302	9818	1916	9217	C	A	GCC->A	GAC->D	non-synonymous	DNA gyrase subunit A
Mb0007	9914	10828	814	10727	G	A	GTC->V	ATC->I	non-synonymous	hypothetical protein
Mb0010c	13557	13222	99	13459	G	A	GAC->D	GAT->D	synonymous	hypothetical protein
Mb0012	14088	14876	313	14400	G	A	GAG->E	AAG->K	non-synonymous	hypothetical protein
Mb0012	14088	14876	773	14860	G	T	GGC->G	GTC->V	non-synonymous	hypothetical protein
Mb0014c	17469	15589	1352	16118	C	A	CGC->R	CTC->L	non-synonymous	Ser/Thr protein kinase
Mb0015c	18761	17466	1109	17653	T	G	CAG->Q	CCG->P	non-synonymous	Ser/Thr protein kinase
Mb0015c	18761	17466	1106	17656	T	C	CAG->Q	CGG->R	non-synonymous	Ser/Thr protein kinase
Mb0015c	18761	17466	906	17856	C	T	ACG->T	ACA->T	synonymous	Ser/Thr protein kinase
Mb0018c	23180	21636	1363	21818	C	A	GCT->A	TCT->S	non-synonymous	serine/threonine phosphatase
Mb0018c	23180	21636	918	22263	G	T	GCC->A	GCA->A	synonymous	serine/threonine phosphatase
Mb0018c	23180	21636	8	23173	A	C	CTC->L	CGC->R	non-synonymous	serine/threonine phosphatase
Mb0019c	23736	23269	24	23713	T	C	CTA->L	CTG->L	synonymous	hypothetical protein
Mb0020c	25425	23860	1133	24293	T	C	CAG->Q	CGG->R	non-synonymous	hypothetical protein
Mb0020c	25425	23860	893	24533	C	T	TGC->C	TAC->Y	non-synonymous	hypothetical protein
Mb0020c	25425	23860	748	24678	G	A	CAC->H	TAC->Y	non-synonymous	hypothetical protein
Mb0020c	25425	23860	665	24761	C	T	GGC->G	GAC->D	non-synonymous	hypothetical protein
Mb0020c	25425	23860	139	25287	G	C	CGC->R	GGC->G	non-synonymous	hypothetical protein
Mb0021c	26862	25894	829	26034	G	C	CCT->P	GCT->A	non-synonymous	hypothetical protein
Mb0026	29225	29587	218	29442	T	C	CTC->L	CCC->P	non-synonymous	hypothetical protein
Mb0027	29702	31135	278	29979	C	A	CCG->P	CAG->Q	non-synonymous	hypothetical protein
Mb0027	29702	31135	1035	30736	A	G	AAA->K	AAG->K	synonymous	hypothetical protein
Mb0027	29702	31135	1340	31041	G	C	CGA->R	CCA->P	non-synonymous	hypothetical protein
Mb0030	32041	33138	568	32608	A	C	AAC->N	CAC->H	non-synonymous	hypothetical protein
Mb0033	34279	36594	1314	35592	C	T	GCC->A	GCT->A	synonymous	8-amino-7-oxononanoate synthase
Mb0033	34279	36594	1714	35992	G	C	GAC->D	CAC->H	non-synonymous	8-amino-7-oxononanoate synthase
Mb0033	34279	36594	2010	36288	G	T	GCG->A	GCT->A	synonymous	8-amino-7-oxononanoate synthase
Mb0033	34279	36594	2244	36522	C	T	TCC->S	TCT->S	synonymous	8-amino-7-oxononanoate synthase
Mb0034	36591	36854	6	36596	G	A	AAG->K	AAA->K	synonymous	acyl carrier protein
Mb0036	37243	38931	47	37289	C	G	TCG->S	TGG->W	non-synonymous	fatty-acid--CoA ligase
Mb0036	37243	38931	76	37318	A	T	ACT->T	TCT->S	non-synonymous	fatty-acid--CoA ligase
Mb0037c	39813	39040	672	39142	C	G	CGG->R	CGC->R	synonymous	hypothetical protein
Mb0037c	39813	39040	72	39742	G	A	CAC->H	CAT->H	synonymous	hypothetical protein
Mb0039	41288	41896	150	41437	T	C	GGT->G	GGC->G	synonymous	hypothetical protein
Mb0042	43546	46455	384	43929	G	A	GTG->V	GTA->V	synonymous	leucyl-tRNA synthetase
Mb0042	43546	46455	1207	44752	A	G	AGG->R	GGG->G	non-synonymous	leucyl-tRNA synthetase
Mb0042	43546	46455	1632	45177	A	G	GCA->A	GCG->A	synonymous	leucyl-tRNA synthetase
Mb0045c	49011	48217	525	48487	T	C	CGA->R	CGG->R	synonymous	oxidoreductase
Mb0046c	49923	49027	580	49344	C	T	GTC->V	ATC->I	non-synonymous	hydrolase
Mb0049c	52681	51812	670	52012	T	C	AGC->S	GGC->G	non-synonymous	hypothetical protein
Mb0051	53647	55689	17	53663	T	C	CTG->L	CCG->P	non-synonymous	bifunctional penicillin-binding protein 1A/1B
Mb0052	55686	57368	1603	57288	C	G	CGG->R	GGG->G	non-synonymous	transmembrane protein
Mb0059	60386	63010	2373	62758	G	A	GGG->G	GGA->G	synonymous	replicative DNA helicase
Mb0062	64981	65406	160	65140	C	T	CCA->P	TCA->S	non-synonymous	hypothetical protein
Mb0063	65542	66684	316	65857	A	G	ATC->I	GTC->V	non-synonymous	endo-1,4-beta-glucanase
Mb0065	68610	71549	1304	69913	T	C	ATC->I	ACC->T	non-synonymous	hypothetical protein
Mb0065	68610	71549	1473	70082	G	A	CCG->P	CCA->P	synonymous	hypothetical protein
Mb0067c	74538	72301	420	74119	T	C	CTA->L	CTG->L	synonymous	isocitrate dehydrogenase
Mb0067c	74538	72301	351	74188	G	C	AAC->N	AAG->K	non-synonymous	isocitrate dehydrogenase
Mb0071c	78923	77646	794	78130	C	T	GGG->G	GAG->E	non-synonymous	serine hydroxymethyltransferase
Mb0080	86563	87168	337	86899	G	A	GTC->V	ATC->I	non-synonymous	transcriptional regulator
Mb0081c	87836	87243	334	87503	C	T	GAG->E	AAG->K	non-synonymous	hypothetical protein
Mb0083	89057	89515	179	89235	T	G	GTG->V	GGG->G	non-synonymous	hypothetical protein
Mb0086	90435	92363	530	90964	T	C	GTC->V	GCC->A	non-synonymous	oxidoreductase
Mb0086	90435	92363	1923	92357	T	A	TGT->C	TGA->*	non-synonymous	oxidoreductase
Mb0089	93986	95452	353	94338	C	T	ACG->T	ATG->M	non-synonymous	hydrogenase HycQ
Mb0089	93986	95452	438	94423	G	A	GGG->G	GGA->G	synonymous	hydrogenase HycQ
Mb0090	95449	96927	688	96136	A	G	ATC->I	GTC->V	non-synonymous	formate hydrogenase HycQ
Mb0091	96962	97636	424	97385	A	C	AGG->R	CGG->R	synonymous	hypothetical protein
Mb0095	100618	102903	7	100624	G	A	GCG->A	ACG->T	non-synonymous	cation transporter P-type ATPase A
Mb0095	100618	102903	957	101574	C	T	GGC->G	GGT->G	synonymous	cation transporter P-type ATPase A
Mb0096c	103698	102850	64	103635	G	A	CGC->R	TGC->C	non-synonymous	hypothetical protein
Mb0097c	104698	103745	920	103779	A	C	CTC->L	CGC->R	non-synonymous	hypothetical protein
Mb0098c	105251	104469	280	104972	T	C	ACG->T	GCG->A	non-synonymous	hypothetical protein
Mb0098c	105251	104469	276	104976	C	A	GGG->G	GGT->G	synonymous	hypothetical protein
Mb0098c	105251	104469	273	104979	G	C	GTC->V	GTG->V	synonymous	hypothetical protein
Mb0098c	105251	104469	156	105096	A	G	GAT->D	GAC->D	synonymous	hypothetical protein
Mb0098c	105251	104469	153	105099	A	G	TTT->F	TTC->F	synonymous	hypothetical protein
Mb0098c	105251	104469	77	105175	C	A	GGG->G	GTG->V	non-synonymous	hypothetical protein
Mb0099	105360	106751	413	105772	T	C	GTC->V	GCC->A	non-synonymous	PPE family protein
Mb0099	105360	106751	544	105903	T	C	TGG->W	CGG->R	non-synonymous	PPE family protein
Mb0099	105360	106751	1011	106370	A	C	CCA->P	CCC->P	synonymous	PPE family protein
Mb0100	106770	107639	124	106893	C	T	CTA->L	TTA->L	synonymous	oxidoreductase
Mb0107	122353	123867	298	122650	T	C	TGG->W	CGG->R	non-synonymous	hypothetical protein
Mb0107	122353	123867	1138	123490	C	T	CAA->Q	TAA->*	non-synonymous	hypothetical protein
Mb0111c	130578	125701	3979	126600	A	C	TCG->S	GCG->A	non-synonymous	cation-transporter ATPase I
Mb0111c	130578	125701	3739	126840	G	A	CCT->P	TCT->S	non-synonymous	cation-transporter ATPase I
Mb0111c	130578	125701	3132	127447	G	C	CTC->L	CTG->L	synonymous	cation-transporter ATPase I
Mb0111c	130578	125701	407	130172	A	G	GTG->V	GCG->A	non-synonymous	cation-transporter ATPase I
Mb0111c	130578	125701	342	130237	T	C	CCA->P	CCG->P	synonymous	cation-transporter ATPase I
Mb0115	133988	136045	1380	135367	C	T	CCC->P	CCT->P	synonymous	transmembrane acyltransferase
Mb0116	136327	137283	897	137223	A	G	CAA->Q	CAG->Q	synonymous	GDP-mannose 4,6-dehydratase
Mb0118	137979	138551	361	138339	A	G	AGA->R	GGA->G	non-synonymous	dehydratase
Mb0119	138702	139619	635	139336	G	T	GGC->G	GTC->V	non-synonymous	sugar kinase
Mb0121	141240	142184	424	141663	G	A	GAT->D	AAT->N	non-synonymous	oxidative stress response regulatory protein OXYS
Mb0124c	147460	145667	1455	146006	A	G	GCT->A	GCC->A	synonymous	elongation factor G
Mb0124c	147460	145667	1185	146276	C	G	GCG->A	GCC->A	synonymous	elongation factor G
Mb0124c	147460	145667	159	147302	G	T	GAC->D	GAA->E	non-synonymous	elongation factor G
Mb0125c	147810	147457	316	147495	A	G	TGG->W	CGG->R	non-synonymous	elongation factor G
Mb0129	149571	151187	417	149987	G	C	GGG->G	GGC->G	synonymous	PE-PGRS family protein
Mb0129	149571	151187	1320	150890	C	T	GGC->G	GGT->G	synonymous	PE-PGRS family protein
Mb0136c	159849	158506	480	159370	A	G	TTT->F	TTC->F	synonymous	acyl-CoA dehydrogenase
Mb0137c	160973	159891	439	160535	T	C	AAG->K	GAG->E	non-synonymous	F420-dependent glucose-6-phosphate dehydrogenase
Mb0138	161060	161665	85	161144	T	G	TTC->F	GTC->V	non-synonymous	acetyltransferase
Mb0141	163556	164881	340	163895	C	T	CCT->P	TCT->S	non-synonymous	cytochrome P450 138
Mb0141	163556	164881	341	163896	C	T	CCT->P	CTT->L	non-synonymous	cytochrome P450 138
Mb0143	165513	166016	287	165799	G	A	GGC->G	GAC->D	non-synonymous	hypothetical protein
Mb0144	166017	167039	551	166567	C	G	ACC->T	AGC->S	non-synonymous	oxidoreductase
Mb0144	166017	167039	680	166696	A	G	CAC->H	CGC->R	non-synonymous	oxidoreductase
Mb0148c	170372	168894	100	170273	G	A	CTC->L	TTC->F	non-synonymous	transmembrane protein
Mb0149	170474	171316	624	171097	C	A	CGC->R	CGA->R	synonymous	TetR family transcriptional regulator
Mb0151	172401	173333	691	173091	A	C	AGG->R	CGG->R	synonymous	hypothetical protein
Mb0156c	179499	177733	76	179424	T	C	AGG->R	GGG->G	non-synonymous	PE family protein
Mb0158c	182175	181345	314	181862	C	T	GGC->G	GAC->D	non-synonymous	phosphotyrosine protein phosphatase PtpB
Mb0159c	183388	182177	375	183014	G	A	ATC->I	ATT->I	synonymous	acyl-CoA dehydrogenase
Mb0159c	183388	182177	108	183281	C	G	CCG->P	CCC->P	synonymous	acyl-CoA dehydrogenase
Mb0161	184913	185245	5	184917	G	A	TGC->C	TAC->Y	non-synonymous	NAD(P) transhydrogenase subunit alpha
Mb0164c	189029	187623	763	188267	T	G	ACG->T	CCG->P	non-synonymous	PE family protein
Mb0165c	190629	189121	631	189999	T	C	ACC->T	GCC->A	non-synonymous	PE family protein
Mb0165c	190629	189121	346	190284	T	C	ACG->T	GCG->A	non-synonymous	PE family protein
Mb0166	190797	192146	210	191006	A	C	TCA->S	TCC->S	synonymous	oxidoreductase
Mb0167c	193325	192174	1149	192177	A	G	CTT->L	CTC->L	synonymous	zinc-type alcohol dehydrogenase (e subunit) adhE
Mb0172	195185	196849	368	195552	C	T	GCC->A	GTC->V	non-synonymous	long-chain-fatty-acid--CoA ligase
Mb0172	195185	196849	574	195758	G	T	GCG->A	TCG->S	non-synonymous	long-chain-fatty-acid--CoA ligase
Mb0172	195185	196849	690	195874	C	G	GTC->V	GTG->V	synonymous	long-chain-fatty-acid--CoA ligase
Mb0174	197852	198721	477	198328	A	C	ATA->I	ATC->I	synonymous	hypothetical protein
Mb0175	198726	200090	1075	199800	T	C	TCG->S	CCG->P	non-synonymous	MCE-family protein MCE1A
Mb0176	200087	201127	536	200622	C	T	ACC->T	ATC->I	non-synonymous	MCE-family protein MCE1B
Mb0177	201124	202671	636	201759	C	G	GAC->D	GAG->E	non-synonymous	MCE-family protein MCE1C
Mb0178	202668	204260	563	203230	T	C	ATC->I	ACC->T	non-synonymous	MCE-family protein MCE1D
Mb0179	204257	205429	30	204286	G	T	GTG->V	GTT->V	synonymous	MCE-family lipoprotein LprK
Mb0182	207644	208612	867	208510	C	T	ATC->I	ATT->I	synonymous	mce associated transmembrane protein
Mb0182	207644	208612	868	208511	A	C	AGC->S	CGC->R	non-synonymous	mce associated transmembrane protein
Mb0182	207644	208612	869	208512	G	A	AGC->S	AAC->N	non-synonymous	mce associated transmembrane protein
Mb0182	207644	208612	870	208513	C	G	AGC->S	AGG->R	non-synonymous	mce associated transmembrane protein
Mb0182	207644	208612	871	208514	G	T	GCA->A	TCA->S	non-synonymous	mce associated transmembrane protein
Mb0185c	211004	209895	371	210634	T	C	CAC->H	CGC->R	non-synonymous	lipoprotein LPRO
Mb0188c	214332	213220	994	213339	C	A	GAC->D	TAC->Y	non-synonymous	RNA polymerase factor sigma-70
Mb0188c	214332	213220	860	213473	C	T	GGC->G	GAC->D	non-synonymous	RNA polymerase factor sigma-70
Mb0191	215907	216416	263	216169	C	T	GCG->A	GTG->V	non-synonymous	hypothetical protein
Mb0192	216461	218536	1595	218055	G	C	CGC->R	CCC->P	non-synonymous	beta-glucosidase BGLS
Mb0193	218897	219559	100	218996	A	G	AGC->S	GGC->G	non-synonymous	O-methyltransferase
Mb0197	222481	223722	637	223117	G	A	GCT->A	ACT->T	non-synonymous	hypothetical protein
Mb0199c	226764	224917	904	225861	T	C	AGT->S	GGT->G	non-synonymous	hypothetical protein
Mb0200	227071	230655	145	227215	G	A	GTC->V	ATC->I	non-synonymous	drugs-transport transmembrane ATP-binding protein ABC transporter
Mb0200	227071	230655	668	227738	T	C	ATG->M	ACG->T	non-synonymous	drugs-transport transmembrane ATP-binding protein ABC transporter
Mb0200	227071	230655	983	228053	T	C	CTG->L	CCG->P	non-synonymous	drugs-transport transmembrane ATP-binding protein ABC transporter
Mb0200	227071	230655	1854	228924	T	C	CGT->R	CGC->R	synonymous	drugs-transport transmembrane ATP-binding protein ABC transporter
Mb0200	227071	230655	3293	230363	C	T	CCC->P	CTC->L	non-synonymous	drugs-transport transmembrane ATP-binding protein ABC transporter
Mb0202	231841	232425	348	232188	G	C	GCG->A	GCC->A	synonymous	transcriptional regulator
Mb0203	232425	234671	1128	233552	C	A	GTC->V	GTA->V	synonymous	oxidoreductase
Mb0203	232425	234671	1134	233558	C	G	AGC->S	AGG->R	non-synonymous	oxidoreductase
Mb0205	236746	237405	412	237157	G	A	GGC->G	AGC->S	non-synonymous	hypothetical protein
Mb0211	243580	244683	215	243794	G	A	CGC->R	CAC->H	non-synonymous	transmembrane protein
Mb0211	243580	244683	1010	244589	C	T	GCC->A	GTC->V	non-synonymous	transmembrane protein
Mb0212c	247514	244680	1398	246117	C	G	GAG->E	GAC->D	non-synonymous	transmembrane transport protein MmpL3
Mb0212c	247514	244680	1150	246365	T	A	ATC->I	TTC->F	non-synonymous	transmembrane transport protein MmpL3
Mb0220	256260	257873	119	256378	C	G	GCC->A	GGC->G	non-synonymous	long-chain-fatty-acid--CoA ligase
Mb0223c	261056	260148	550	260507	T	G	ACG->T	CCG->P	non-synonymous	esterase
Mb0224	261149	262477	1237	262385	A	G	AAT->N	GAT->D	non-synonymous	transmembrane protein
Mb0225	262479	263027	15	262493	A	T	GCA->A	GCT->A	synonymous	transmembrane protein
Mb0227	264292	265065	63	264354	G	A	ATG->M	ATA->I	non-synonymous	hypothetical protein
Mb0228c	266088	264931	906	265183	A	G	GAT->D	GAC->D	synonymous	aldehyde dehydrogenase
Mb0228c	266088	264931	436	265653	A	G	TCG->S	CCG->P	non-synonymous	aldehyde dehydrogenase
Mb0228c	266088	264931	14	266075	G	C	GCC->A	GGC->G	non-synonymous	aldehyde dehydrogenase
Mb0229c	266951	266187	351	266601	C	G	TTG->L	TTC->F	non-synonymous	methyltransferase
Mb0231c	269888	268158	1135	268754	G	C	CCT->P	GCT->A	non-synonymous	transmembrane protein
Mb0232c	271163	269898	1175	269989	T	C	AAT->N	AGT->S	non-synonymous	hypothetical protein
Mb0232c	271163	269898	87	271077	C	G	AGG->R	AGC->S	non-synonymous	hypothetical protein
Mb0233	271379	272602	504	271882	G	C	TCG->S	TCC->S	synonymous	integral membrane acyltransferase
Mb0235c	274287	273307	597	273691	T	G	GAA->E	GAC->D	non-synonymous	phosphotriesterase
Mb0237	276223	276912	123	276345	T	C	CGT->R	CGC->R	synonymous	TetR/ACRR family transcriptional regulator
Mb0241c	285175	280973	3960	281216	C	T	ACG->T	ACA->T	synonymous	transmembrane protein
Mb0241c	285175	280973	3242	281934	G	A	GCC->A	GTC->V	non-synonymous	transmembrane protein
Mb0241c	285175	280973	2968	282208	C	T	GCC->A	ACC->T	non-synonymous	transmembrane protein
Mb0241c	285175	280973	1234	283942	C	T	GTG->V	ATG->M	non-synonymous	transmembrane protein
Mb0243	285510	286676	385	285894	T	G	TTG->L	GTG->V	non-synonymous	lipoprotein LpqI
Mb0243	285510	286676	1075	286584	C	T	CTG->L	TTG->L	synonymous	lipoprotein LpqI
Mb0244	286752	287366	525	287276	T	C	ACT->T	ACC->T	synonymous	TetR family transcriptional regulator
Mb0246	287669	288106	91	287759	T	G	TCT->S	GCT->A	non-synonymous	hypothetical protein
Mb0247c	288978	288136	201	288778	T	C	TTA->L	TTG->L	synonymous	hypothetical protein
Mb0250c	293958	292123	1436	292523	G	T	GCG->A	GAG->E	non-synonymous	acyl-CoA dehydrogenase
Mb0250c	293958	292123	1181	292778	C	T	AGG->R	AAG->K	non-synonymous	acyl-CoA dehydrogenase
Mb0251	294330	294818	308	294637	C	T	TCC->S	TTC->F	non-synonymous	oxidoreductase
Mb0252	295134	296444	386	295519	T	C	GTG->V	GCG->A	non-synonymous	hypothetical protein
Mb0258	301191	303752	174	301364	T	C	GGT->G	GGC->G	synonymous	nitrite reductase [NAD(P)H] large subunit
Mb0258	301191	303752	2323	303513	G	T	GTG->V	TTG->L	non-synonymous	nitrite reductase [NAD(P)H] large subunit
Mb0261c	306183	304699	756	305428	T	C	GGA->G	GGG->G	synonymous	cobyric acid synthase
Mb0267c	312493	311084	1318	311176	A	G	TTG->L	CTG->L	synonymous	integral membrane nitrite extrusion protein NarK3
Mb0267c	312493	311084	300	312194	A	G	TCT->S	TCC->S	synonymous	integral membrane nitrite extrusion protein NarK3
Mb0272c	319479	315850	975	318505	G	A	ATC->I	ATT->I	synonymous	5-oxoprolinase
Mb0273	319656	321047	1354	321009	T	C	TTG->L	CTG->L	synonymous	integral membrane nitrite extrusion protein NARU (nitrite facilitator)
Mb0278c	328033	326900	491	327543	A	G	CTC->L	CCC->P	non-synonymous	hypothetical protein
Mb0281c	329983	329258	71	329913	A	G	TTG->L	TCG->S	non-synonymous	TetR family transcriptional regulator
Mb0286c	337330	334697	950	336381	A	T	CTC->L	CAC->H	non-synonymous	PE-PGRS family protein
Mb0286c	337330	334697	949	336382	G	T	CTC->L	ATC->I	non-synonymous	PE-PGRS family protein
Mb0286c	337330	334697	947	336384	A	C	ATG->M	AGG->R	non-synonymous	PE-PGRS family protein
Mb0286c	337330	334697	946	336385	T	C	ATG->M	GTG->V	non-synonymous	PE-PGRS family protein
Mb0286c	337330	334697	936	336395	G	A	GGC->G	GGT->G	synonymous	PE-PGRS family protein
Mb0286c	337330	334697	920	336411	T	A	GAC->D	GTC->V	non-synonymous	PE-PGRS family protein
Mb0286c	337330	334697	919	336412	C	T	GAC->D	AAC->N	non-synonymous	PE-PGRS family protein
Mb0286c	337330	334697	910	336421	C	T	GCC->A	ACC->T	non-synonymous	PE-PGRS family protein
Mb0286c	337330	334697	908	336423	A	T	GTC->V	GAC->D	non-synonymous	PE-PGRS family protein
Mb0286c	337330	334697	907	336424	C	T	GTC->V	ATC->I	non-synonymous	PE-PGRS family protein
Mb0286c	337330	334697	906	336425	C	G	CTG->L	CTC->L	synonymous	PE-PGRS family protein
Mb0286c	337330	334697	905	336426	A	G	CTG->L	CCG->P	non-synonymous	PE-PGRS family protein
Mb0286c	337330	334697	904	336427	G	T	CTG->L	ATG->M	non-synonymous	PE-PGRS family protein
Mb0286c	337330	334697	902	336429	C	G	AGC->S	ACC->T	non-synonymous	PE-PGRS family protein
Mb0286c	337330	334697	901	336430	T	C	AGC->S	GGC->G	non-synonymous	PE-PGRS family protein
Mb0286c	337330	334697	899	336432	T	A	CAC->H	CTC->L	non-synonymous	PE-PGRS family protein
Mb0286c	337330	334697	898	336433	G	C	CAC->H	GAC->D	non-synonymous	PE-PGRS family protein
Mb0286c	337330	334697	897	336434	T	C	GGA->G	GGG->G	synonymous	PE-PGRS family protein
Mb0286c	337330	334697	890	336441	C	G	AGC->S	ACC->T	non-synonymous	PE-PGRS family protein
Mb0286c	337330	334697	889	336442	T	C	AGC->S	GGC->G	non-synonymous	PE-PGRS family protein
Mb0286c	337330	334697	882	336449	T	C	GAA->E	GAG->E	synonymous	PE-PGRS family protein
Mb0286c	337330	334697	881	336450	T	G	GAA->E	GCA->A	non-synonymous	PE-PGRS family protein
Mb0286c	337330	334697	873	336458	T	G	GCA->A	GCC->A	synonymous	PE-PGRS family protein
Mb0286c	337330	334697	872	336459	G	C	GCA->A	GGA->G	non-synonymous	PE-PGRS family protein
Mb0286c	337330	334697	871	336460	C	T	GCA->A	ACA->T	non-synonymous	PE-PGRS family protein
Mb0286c	337330	334697	865	336466	A	G	TTC->F	CTC->L	non-synonymous	PE-PGRS family protein
Mb0286c	337330	334697	858	336473	G	A	GGC->G	GGT->G	synonymous	PE-PGRS family protein
Mb0286c	337330	334697	856	336475	C	T	GGC->G	AGC->S	non-synonymous	PE-PGRS family protein
Mb0286c	337330	334697	837	336494	G	A	GTC->V	GTT->V	synonymous	PE-PGRS family protein
Mb0286c	337330	334697	836	336495	A	G	GTC->V	GCC->A	non-synonymous	PE-PGRS family protein
Mb0286c	337330	334697	426	336905	T	G	GGA->G	GGC->G	synonymous	PE-PGRS family protein
Mb0286c	337330	334697	405	336926	T	C	TTA->L	TTG->L	synonymous	PE-PGRS family protein
Mb0286c	337330	334697	392	336939	T	G	GAC->D	GCC->A	non-synonymous	PE-PGRS family protein
Mb0286c	337330	334697	391	336940	C	G	GAC->D	CAC->H	non-synonymous	PE-PGRS family protein
Mb0286c	337330	334697	389	336942	C	G	GGG->G	GCG->A	non-synonymous	PE-PGRS family protein
Mb0286c	337330	334697	384	336947	A	G	AAT->N	AAC->N	synonymous	PE-PGRS family protein
Mb0286c	337330	334697	382	336949	T	C	AAT->N	GAT->D	non-synonymous	PE-PGRS family protein
Mb0286c	337330	334697	340	336991	A	G	TTG->L	CTG->L	synonymous	PE-PGRS family protein
Mb0286c	337330	334697	306	337025	G	A	ATC->I	ATT->I	synonymous	PE-PGRS family protein
Mb0286c	337330	334697	261	337070	A	G	TAT->Y	TAC->Y	synonymous	PE-PGRS family protein
Mb0286c	337330	334697	258	337073	G	C	GCC->A	GCG->A	synonymous	PE-PGRS family protein
Mb0286c	337330	334697	237	337094	T	C	GCA->A	GCG->A	synonymous	PE-PGRS family protein
Mb0286c	337330	334697	230	337101	A	G	GTG->V	GCG->A	non-synonymous	PE-PGRS family protein
Mb0286c	337330	334697	229	337102	C	T	GTG->V	ATG->M	non-synonymous	PE-PGRS family protein
Mb0286c	337330	334697	198	337133	G	A	AGC->S	AGT->S	synonymous	PE-PGRS family protein
Mb0286c	337330	334697	171	337160	G	C	GCC->A	GCG->A	synonymous	PE-PGRS family protein
Mb0286c	337330	334697	156	337175	G	C	GCC->A	GCG->A	synonymous	PE-PGRS family protein
Mb0286c	337330	334697	153	337178	G	A	ATC->I	ATT->I	synonymous	PE-PGRS family protein
Mb0286c	337330	334697	151	337180	T	C	ATC->I	GTC->V	non-synonymous	PE-PGRS family protein
Mb0286c	337330	334697	150	337181	G	C	GCC->A	GCG->A	synonymous	PE-PGRS family protein
Mb0286c	337330	334697	147	337184	T	C	ACA->T	ACG->T	synonymous	PE-PGRS family protein
Mb0286c	337330	334697	141	337190	C	G	GTG->V	GTC->V	synonymous	PE-PGRS family protein
Mb0286c	337330	334697	138	337193	C	T	GAG->E	GAA->E	synonymous	PE-PGRS family protein
Mb0286c	337330	334697	135	337196	G	A	GAC->D	GAT->D	synonymous	PE-PGRS family protein
Mb0286c	337330	334697	129	337202	G	A	GGC->G	GGT->G	synonymous	PE-PGRS family protein
Mb0286c	337330	334697	118	337213	T	G	ATG->M	CTG->L	non-synonymous	PE-PGRS family protein
Mb0286c	337330	334697	114	337217	T	C	GCA->A	GCG->A	synonymous	PE-PGRS family protein
Mb0286c	337330	334697	90	337241	T	C	GCA->A	GCG->A	synonymous	PE-PGRS family protein
Mb0286c	337330	334697	84	337247	T	G	GCA->A	GCC->A	synonymous	PE-PGRS family protein
Mb0286c	337330	334697	77	337254	C	G	AGC->S	ACC->T	non-synonymous	PE-PGRS family protein
Mb0286c	337330	334697	76	337255	T	C	AGC->S	GGC->G	non-synonymous	PE-PGRS family protein
Mb0286c	337330	334697	66	337265	T	C	GGA->G	GGG->G	synonymous	PE-PGRS family protein
Mb0286c	337330	334697	65	337266	C	T	GGA->G	GAA->E	non-synonymous	PE-PGRS family protein
Mb0286c	337330	334697	54	337277	C	T	TTG->L	TTA->L	synonymous	PE-PGRS family protein
Mb0288	340366	341976	769	341134	G	A	GAA->E	AAA->K	non-synonymous	PPE family protein
Mb0290	343132	345027	1152	344283	C	G	GCC->A	GCG->A	synonymous	hypothetical protein
Mb0294	350937	352478	555	351491	C	G	GCC->A	GCG->A	synonymous	PPE family protein
Mb0298	354085	355503	227	354311	G	A	AGC->S	AAC->N	non-synonymous	transmembrane protein
Mb0298	354085	355503	283	354367	G	A	GCC->A	ACC->T	non-synonymous	transmembrane protein
Mb0298	354085	355503	1198	355282	A	G	ACG->T	GCG->A	non-synonymous	transmembrane protein
Mb0305	362336	364156	483	362818	T	C	TTT->F	TTC->F	synonymous	PE-PGRS family protein
Mb0306	364299	364526	213	364511	G	A	CGG->R	CGA->R	synonymous	hypothetical protein
Mb0307	364523	364825	38	364560	A	G	AAT->N	AGT->S	non-synonymous	hypothetical protein
Mb0307	364523	364825	282	364804	T	C	GTT->V	GTC->V	synonymous	hypothetical protein
Mb0310	365652	366284	250	365901	C	G	CAT->H	GAT->D	non-synonymous	TetR/ACRR family transcriptional regulator
Mb0310	365652	366284	371	366022	T	C	GTG->V	GCG->A	non-synonymous	TetR/ACRR family transcriptional regulator
Mb0312c	370640	367197	2863	367778	C	T	GCC->A	ACC->T	non-synonymous	PPE family protein
Mb0312c	370640	367197	2123	368518	A	G	TTC->F	TCC->S	non-synonymous	PPE family protein
Mb0312c	370640	367197	1441	369200	T	C	AGC->S	GGC->G	non-synonymous	PPE family protein
Mb0313c	376741	370784	3562	373180	A	G	TTG->L	CTG->L	synonymous	PPE family protein
Mb0313c	376741	370784	1359	375383	A	G	CGT->R	CGC->R	synonymous	PPE family protein
Mb0315c	378085	377603	42	378044	C	T	CTG->L	CTA->L	synonymous	hypothetical protein
Mb0319	380202	381431	357	380558	G	T	GAG->E	GAT->D	non-synonymous	hypothetical protein
Mb0320	381586	383448	475	382060	G	A	GGT->G	AGT->S	non-synonymous	hypothetical protein
Mb0320	381586	383448	1688	383273	T	C	CTG->L	CCG->P	non-synonymous	hypothetical protein
Mb0322c	384571	383909	551	384021	G	A	GCC->A	GTC->V	non-synonymous	hypothetical protein
Mb0323	384632	385516	115	384746	C	T	CCG->P	TCG->S	non-synonymous	beta-1,3-glucanase
Mb0327	388178	388846	446	388623	T	G	CTC->L	CGC->R	non-synonymous	pyrrolidone-carboxylate peptidase
Mb0329	389612	390184	548	390159	G	A	TGC->C	TAC->Y	non-synonymous	deoxycytidine triphosphate deaminase
Mb0333	393069	393758	468	393536	G	A	GGG->G	GGA->G	synonymous	hypothetical protein
Mb0334c	395075	393726	298	394778	A	G	TAC->Y	CAC->H	non-synonymous	cytochrome P450 135A1
Mb0336c	396350	395724	386	395965	G	C	TCG->S	TGG->W	non-synonymous	hypothetical protein
Mb0339	398472	399257	593	399064	G	A	GGA->G	GAA->E	non-synonymous	hypothetical protein
Mb0343	401222	402733	402	401623	T	G	CCT->P	CCG->P	synonymous	hypothetical protein
Mb0343	401222	402733	1127	402348	A	G	TAC->Y	TGC->C	non-synonymous	hypothetical protein
Mb0343	401222	402733	1487	402708	A	C	CAC->H	CCC->P	non-synonymous	hypothetical protein
Mb0345c	406871	404223	54	406818	A	C	GTT->V	GTG->V	synonymous	iron-sulfur-binding reductase
Mb0349	411868	413790	263	412130	G	A	AGT->S	AAT->N	non-synonymous	isoniazid inductible gene protein INIA
Mb0349	411868	413790	1443	413310	G	T	CAG->Q	CAT->H	non-synonymous	isoniazid inductible gene protein INIA
Mb0359	422738	423445	671	423408	T	C	TTG->L	TCG->S	non-synonymous	heat shock protein GrpE
Mb0360	423481	424668	294	423774	C	T	GGC->G	GGT->G	synonymous	molecular chaperone DnaJ
Mb0362c	435696	425173	9733	425964	A	T	TTC->F	ATC->I	non-synonymous	PPE family protein
Mb0362c	435696	425173	9684	426013	G	A	CCC->P	CCT->P	synonymous	PPE family protein
Mb0362c	435696	425173	8794	426903	C	G	GGC->G	CGC->R	non-synonymous	PPE family protein
Mb0362c	435696	425173	7209	428488	G	T	GGC->G	GGA->G	synonymous	PPE family protein
Mb0362c	435696	425173	5620	430077	C	T	GAC->D	AAC->N	non-synonymous	PPE family protein
Mb0362c	435696	425173	2144	433553	C	T	GGT->G	GAT->D	non-synonymous	PPE family protein
Mb0365	437877	438524	606	438482	C	G	TCC->S	TCG->S	synonymous	hypothetical protein
Mb0366	438535	439314	754	439288	A	G	ACC->T	GCC->A	non-synonymous	hypothetical protein
Mb0369	440888	442270	875	441762	C	T	GCC->A	GTC->V	non-synonymous	Mg2+ transporter
Mb0370c	443316	442282	477	442840	C	T	GAG->E	GAA->E	synonymous	fructose-bisphosphate aldolase
Mb0371	443412	444095	577	443988	C	A	CTC->L	ATC->I	non-synonymous	transmembrane protein
Mb0372c	445214	444084	639	444576	A	C	GTT->V	GTG->V	synonymous	hypothetical protein
Mb0375c	447542	446331	1111	446432	T	C	AGT->S	GGT->G	non-synonymous	hypothetical protein
Mb0376c	448063	447548	385	447679	G	T	CCT->P	ACT->T	non-synonymous	membrane oxidoreductase
Mb0377c	449060	448164	602	448459	T	C	GAG->E	GGG->G	non-synonymous	oxidoreductase
Mb0379c	450402	449647	481	449922	T	C	AGC->S	GGC->G	non-synonymous	hypothetical protein
Mb0380c	452820	450421	1689	451132	T	C	TCA->S	TCG->S	synonymous	carbon monoxyde dehydrogenase large subunit
Mb0380c	452820	450421	365	452456	G	A	TCC->S	TTC->F	non-synonymous	carbon monoxyde dehydrogenase large subunit
Mb0381c	453296	452817	453	452844	T	C	GCA->A	GCG->A	synonymous	carbon monoxyde dehydrogenase small subunit
Mb0383c	455389	454247	40	455350	T	G	ACG->T	CCG->P	non-synonymous	hypothetical protein
Mb0384	455438	456403	905	456342	G	C	CGG->R	CCG->P	non-synonymous	LysR family transcriptional regulator
Mb0384	455438	456403	909	456346	C	T	GGC->G	GGT->G	synonymous	LysR family transcriptional regulator
Mb0387c	457836	457285	226	457611	T	C	ATG->M	GTG->V	non-synonymous	RNA methyltransferase
Mb0390c	460332	459478	21	460312	C	G	ACG->T	ACC->T	synonymous	hypothetical protein
Mb0391c	463019	460473	1590	461430	C	T	AAG->K	AAA->K	synonymous	endopeptidase ATP-binding protein ClpB
Mb0393	464428	467685	1890	466317	C	T	TTC->F	TTT->F	synonymous	LuxR family transcriptional regulator
Mb0393	464428	467685	2916	467343	C	T	CGC->R	CGT->R	synonymous	LuxR family transcriptional regulator
Mb0393	464428	467685	2975	467402	C	A	GCC->A	GAC->D	non-synonymous	LuxR family transcriptional regulator
Mb0394c	469020	467689	425	468596	G	T	GCA->A	GAA->E	non-synonymous	PPE family protein
Mb0395	469354	470613	23	469376	G	A	GGA->G	GAA->E	non-synonymous	phosphoribosylglycinamide formyltransferase 2
Mb0395	469354	470613	995	470348	C	T	ACC->T	ATC->I	non-synonymous	phosphoribosylglycinamide formyltransferase 2
Mb0398c	473658	472246	722	472937	G	A	GCC->A	GTC->V	non-synonymous	membrane NADH dehydrogenase
Mb0399	473800	475125	909	474708	A	G	GCA->A	GCG->A	synonymous	hypothetical protein
Mb0403	476835	477203	51	476885	G	C	ACG->T	ACC->T	synonymous	hypothetical protein
Mb0404c	478339	477698	87	478253	T	G	GAA->E	GAC->D	non-synonymous	hypothetical protein
Mb0409c	484249	482474	1352	482898	G	A	CCC->P	CTC->L	non-synonymous	transmembrane transport protein MmpL1A
Mb0411	484995	486752	262	485256	G	A	GCG->A	ACG->T	non-synonymous	acyl-CoA synthetase
Mb0411	484995	486752	620	485614	C	T	CCG->P	CTG->L	non-synonymous	acyl-CoA synthetase
Mb0413	488118	490958	780	488897	G	T	GGG->G	GGT->G	synonymous	polyketide synthase
Mb0413	488118	490958	1902	490019	T	C	ACT->T	ACC->T	synonymous	polyketide synthase
Mb0413	488118	490958	2761	490878	G	A	GTG->V	ATG->M	non-synonymous	polyketide synthase
Mb0417	494870	496027	835	495704	C	A	CGG->R	AGG->R	synonymous	acetate kinase
Mb0418c	498333	496081	207	498127	T	C	CCA->P	CCG->P	synonymous	serine/threonine-protein kinase G
Mb0419c	499319	498333	810	498510	G	A	GAC->D	GAT->D	synonymous	glutamine-binding lipoprotein
Mb0423	502167	503189	473	502639	T	C	GTG->V	GCG->A	non-synonymous	thiamine biosynthesis oxidoreductase ThiO
Mb0428c	507990	507580	62	507929	T	C	GAA->E	GGA->G	non-synonymous	transmembrane protein
Mb0433c	516340	511721	665	515676	G	T	GCG->A	GAG->E	non-synonymous	metal cation transporting P-type ATPase CtpH
Mb0434c	516835	516392	290	516546	G	A	CCC->P	CTC->L	non-synonymous	transmembrane protein
Mb0436c	518822	517914	393	518430	G	A	CGC->R	CGT->R	synonymous	hypothetical protein
Mb0437c	519415	518822	4	519412	T	C	ACA->T	GCA->A	non-synonymous	peptide deformylase
Mb0438	519752	520060	255	520006	C	T	CGC->R	CGT->R	synonymous	hypothetical protein
Mb0439	520092	520586	113	520204	G	T	GGC->G	GTC->V	non-synonymous	tuberculin-like protein
Mb0439	520092	520586	259	520350	G	A	GCA->A	ACA->T	non-synonymous	tuberculin-like protein
Mb0440	520619	521341	207	520825	A	G	GCA->A	GCG->A	synonymous	periplasmic superoxide dismutase [Cu-Zn] SodC
Mb0441	521343	522473	996	522338	C	T	TGC->C	TGT->C	synonymous	carboxylate-amine ligase
Mb0442	522533	523186	568	523100	G	A	GCG->A	ACG->T	non-synonymous	hypothetical protein
Mb0446c	528379	527162	45	528335	G	C	ATC->I	ATG->M	non-synonymous	molybdopterin biosynthesis protein MoeA
Mb0452c	534808	534110	551	534258	T	C	GAG->E	GGG->G	non-synonymous	hypothetical protein
Mb0452c	534808	534110	320	534489	T	C	GAC->D	GGC->G	non-synonymous	hypothetical protein
Mb0452c	534808	534110	243	534566	C	G	GAG->E	GAC->D	non-synonymous	hypothetical protein
Mb0458c	542510	539607	1629	540882	G	A	AGC->S	AGT->S	synonymous	transmembrane transport protein MmpL4
Mb0458c	542510	539607	1609	540902	G	A	CTG->L	TTG->L	synonymous	transmembrane transport protein MmpL4
Mb0458c	542510	539607	940	541571	T	C	ACC->T	GCC->A	non-synonymous	transmembrane transport protein MmpL4
Mb0460	543161	543871	373	543533	C	G	CAT->H	GAT->D	non-synonymous	transcriptional regulator
Mb0466c	550635	548605	254	550382	C	G	CGC->R	CCC->P	non-synonymous	peptidase
Mb0474c	557325	555901	977	556349	T	C	CAG->Q	CGG->R	non-synonymous	transcriptional regulator
Mb0474c	557325	555901	106	557220	C	T	GAC->D	AAC->N	non-synonymous	transcriptional regulator
Mb0479c	562730	561867	855	561876	G	C	CTC->L	CTG->L	synonymous	mycolic acid synthase PcaA
Mb0479c	562730	561867	414	562317	T	C	GCA->A	GCG->A	synonymous	mycolic acid synthase PcaA
Mb0483	564583	565953	1358	565940	A	G	CAA->Q	CGA->R	non-synonymous	transmembrane protein
Mb0484	566040	566462	135	566174	A	C	GGA->G	GGC->G	synonymous	transcriptional regulator
Mb0484	566040	566462	384	566423	T	G	CGT->R	CGG->R	synonymous	transcriptional regulator
Mb0493	572673	574028	882	573554	C	T	GAC->D	GAT->D	synonymous	lipoprotein LprQ
Mb0494c	574764	574009	525	574240	C	G	ACG->T	ACC->T	synonymous	short-chain type oxidoreductase
Mb0494c	574764	574009	418	574347	G	T	CTC->L	ATC->I	non-synonymous	short-chain type oxidoreductase
Mb0496	576311	577753	560	576870	C	T	GCA->A	GTA->V	non-synonymous	mannosyltransferase
Mb0502c	584529	582640	1558	582972	A	G	TTC->F	CTC->L	non-synonymous	oxidoreductase GMC-type
Mb0502c	584529	582640	1158	583372	C	T	GGG->G	GGA->G	synonymous	oxidoreductase GMC-type
Mb0502c	584529	582640	208	584322	A	C	TCG->S	GCG->A	non-synonymous	oxidoreductase GMC-type
Mb0504c	585841	584852	873	584969	T	C	CAA->Q	CAG->Q	synonymous	hypothetical protein
Mb0504c	585841	584852	180	585662	T	G	ACA->T	ACC->T	synonymous	hypothetical protein
Mb0508	588528	589460	9	588536	A	G	GGA->G	GGG->G	synonymous	transmembrane protein
Mb0511	591234	592121	681	591914	C	G	GAC->D	GAG->E	non-synonymous	pyrroline-5-carboxylate reductase
Mb0519	598350	601256	355	598704	C	G	CAC->H	GAC->D	non-synonymous	transmembrane transport protein MmpL2
Mb0519	598350	601256	1525	599874	T	G	TAT->Y	GAT->D	non-synonymous	transmembrane transport protein MmpL2
Mb0519	598350	601256	2165	600514	G	C	TGT->C	TCT->S	non-synonymous	transmembrane transport protein MmpL2
Mb0525	605753	606742	549	606301	G	A	CGG->R	CGA->R	synonymous	delta-aminolevulinic acid dehydratase
Mb0525	605753	606742	737	606489	G	A	GGA->G	GAA->E	non-synonymous	delta-aminolevulinic acid dehydratase
Mb0530	609897	611207	618	610514	T	C	CAT->H	CAC->H	synonymous	membrane acyltransferase
Mb0530	609897	611207	1181	611077	A	G	GAC->D	GGC->G	non-synonymous	membrane acyltransferase
Mb0532c	613224	612322	702	612523	C	T	CAG->Q	CAA->Q	synonymous	hypothetical protein
Mb0535	614188	615492	1158	615345	G	A	GTG->V	GTA->V	synonymous	GABA permease GabP
Mb0542	621041	622015	735	621775	A	G	ATA->I	ATG->M	non-synonymous	cytochrome C-type biogenesis protein CcsA
Mb0543	622057	623274	330	622386	C	G	TCC->S	TCG->S	synonymous	hypothetical protein
Mb0543	622057	623274	692	622748	C	T	CCC->P	CTC->L	non-synonymous	hypothetical protein
Mb0545	623943	625688	1029	624971	T	G	GGT->G	GGG->G	synonymous	hypothetical protein
Mb0545	623943	625688	1503	625445	T	C	GGT->G	GGC->G	synonymous	hypothetical protein
Mb0550	628492	629532	238	628729	G	A	GTC->V	ATC->I	non-synonymous	UDP-glucose 4-epimerase
Mb0551c	630975	629542	868	630108	T	C	ACC->T	GCC->A	non-synonymous	hypothetical protein
Mb0552	631284	632930	648	631931	T	G	CCT->P	CCG->P	synonymous	hypothetical protein
Mb0555c	635648	634299	676	634973	C	T	GTC->V	ATC->I	non-synonymous	hypothetical protein
Mb0567	644132	645736	114	644245	C	G	CGC->R	CGG->R	synonymous	hypothetical protein
Mb0567	644132	645736	1551	645682	T	C	GCT->A	GCC->A	synonymous	hypothetical protein
Mb0572	649779	650915	132	649910	T	C	GAT->D	GAC->D	synonymous	mannosyltransferase
Mb0577	654014	655021	165	654178	T	C	GGT->G	GGC->G	synonymous	polyprenyl synthetase
Mb0580c	658713	657253	390	658324	C	T	GTG->V	GTA->V	synonymous	monooxygenase
Mb0580c	658713	657253	329	658385	C	T	CGC->R	CAC->H	non-synonymous	monooxygenase
Mb0581c	659282	658791	462	658821	G	A	GAC->D	GAT->D	synonymous	nucleotide-binding protein
Mb0582	659564	660583	603	660166	G	C	TTG->L	TTC->F	non-synonymous	methyltransferase/methylase
Mb0588c	668484	667093	381	668104	G	A	TTC->F	TTT->F	synonymous	nicotinate phosphoribosyltransferase
Mb0589c	669636	668494	12	669625	C	A	AAG->K	AAT->N	non-synonymous	hypothetical protein
Mb0590c	670988	669852	713	670276	T	A	GAC->D	GTC->V	non-synonymous	hypothetical protein
Mb0592	672409	673194	220	672628	C	G	CCG->P	GCG->A	non-synonymous	hypothetical protein
Mb0593c	677159	673239	3837	673323	A	G	CCT->P	CCC->P	synonymous	PE-PGRS family protein
Mb0593c	677159	673239	3280	673880	T	C	ACC->T	GCC->A	non-synonymous	PE-PGRS family protein
Mb0593c	677159	673239	2353	674807	C	T	GCC->A	ACC->T	non-synonymous	PE-PGRS family protein
Mb0599	680472	683105	269	680740	G	A	GGC->G	GAC->D	non-synonymous	hypothetical protein
Mb0600c	685515	683128	447	685069	T	C	ATA->I	ATG->M	non-synonymous	hypothetical protein
Mb0600c	685515	683128	444	685072	C	T	GCG->A	GCA->A	synonymous	hypothetical protein
Mb0602	686372	687169	106	686477	C	T	CTG->L	TTG->L	synonymous	hypothetical protein
Mb0603	687171	688058	337	687507	G	A	GCG->A	ACG->T	non-synonymous	hypothetical protein
Mb0604	688064	689278	533	688596	C	T	CCG->P	CTG->L	non-synonymous	MCE-family protein MCE2A
Mb0606	690303	691748	146	690448	T	C	ATG->M	ACG->T	non-synonymous	MCE-family protein MCE2C
Mb0606	690303	691748	1190	691492	A	C	AAC->N	ACC->T	non-synonymous	MCE-family protein MCE2C
Mb0609	693269	693835	565	693833	T	C	TAA->*	CAA->Q	non-synonymous	MCE-family lipoprotein LprL
Mb0610	694482	696032	1295	695776	A	G	AAC->N	AGC->S	non-synonymous	MCE-family protein MCE2F
Mb0618c	701044	700283	82	700963	T	C	ATC->I	GTC->V	non-synonymous	two component DNA binding transcriptional regulatory protein TCRA
Mb0619	701101	701412	229	701329	G	C	GCC->A	CCC->P	non-synonymous	hypothetical protein
Mb0619	701101	701412	286	701386	A	G	AAA->K	GAA->E	non-synonymous	hypothetical protein
Mb0620	701484	702434	538	702021	C	T	CCG->P	TCG->S	non-synonymous	lipoprotein lpqo
Mb0624	704489	704734	123	704611	C	T	CGC->R	CGT->R	synonymous	hypothetical protein
Mb0627c	707154	705997	704	706451	T	G	GAA->E	GCA->A	non-synonymous	hypothetical protein
Mb0627c	707154	705997	308	706847	C	T	AGC->S	AAC->N	non-synonymous	hypothetical protein
Mb0630c	710760	708193	2182	708579	T	C	ACC->T	GCC->A	non-synonymous	hypothetical protein
Mb0634	712251	712652	69	712319	T	C	GCT->A	GCC->A	synonymous	hypothetical protein
Mb0635	712781	713965	547	713327	G	C	GGG->G	CGG->R	non-synonymous	galactose-1-phosphate uridylyltransferase
Mb0635	712781	713965	594	713374	C	G	GCC->A	GCG->A	synonymous	galactose-1-phosphate uridylyltransferase
Mb0636	713962	715053	1087	715048	T	C	TGT->C	CGT->R	non-synonymous	galactokinase
Mb0637	715448	716605	1065	716512	G	A	TGG->W	TGA->*	non-synonymous	hypothetical protein
Mb0641c	719139	718399	306	718834	G	A	GTC->V	GTT->V	synonymous	transmembrane protein
Mb0644c	721158	720007	255	720904	T	C	GTA->V	GTG->V	synonymous	hypothetical protein
Mb0645c	722978	721251	1606	721373	C	T	GCC->A	ACC->T	non-synonymous	exonuclease V subunit alpha
Mb0645c	722978	721251	525	722454	T	C	GGA->G	GGG->G	synonymous	exonuclease V subunit alpha
Mb0645c	722978	721251	360	722619	T	G	GAA->E	GAC->D	non-synonymous	exonuclease V subunit alpha
Mb0647c	726258	723565	2431	723828	A	C	TTC->F	GTC->V	non-synonymous	exonuclease V subunit beta
Mb0647c	726258	723565	220	726039	A	C	TTG->L	GTG->V	non-synonymous	exonuclease V subunit beta
Mb0648c	729551	726258	3117	726435	G	A	TTC->F	TTT->F	synonymous	exonuclease V subunit gamma
Mb0648c	729551	726258	2573	726979	A	G	CTC->L	CCC->P	non-synonymous	exonuclease V subunit gamma
Mb0648c	729551	726258	986	728566	T	C	GAG->E	GGG->G	non-synonymous	exonuclease V subunit gamma
Mb0649c	730523	729828	165	730359	A	G	GGT->G	GGC->G	synonymous	enoyl-CoA hydratase
Mb0651c	732269	731556	19	732251	A	G	TAC->Y	CAC->H	non-synonymous	glyoxalase II
Mb0655	733629	734057	160	733788	G	A	GCC->A	ACC->T	non-synonymous	(3R)-hydroxyacyl-ACP dehydratase subunit HadB
Mb0660	736753	737460	349	737101	G	A	GCA->A	ACA->T	non-synonymous	50S ribosomal protein L1
Mb0661c	738439	737534	891	737549	T	C	CCA->P	CCG->P	synonymous	methoxy mycolic acid synthase
Mb0661c	738439	737534	285	738155	T	G	TTA->L	TTC->F	non-synonymous	methoxy mycolic acid synthase
Mb0663c	740396	739533	639	739758	T	G	GAA->E	GAC->D	non-synonymous	methoxy mycolic acid synthase
Mb0663c	740396	739533	341	740056	A	C	CTC->L	CGC->R	non-synonymous	methoxy mycolic acid synthase
Mb0666c	743853	742387	877	742977	T	C	ACC->T	GCC->A	non-synonymous	hypothetical protein
Mb0667	744488	748135	599	745086	T	C	TTG->L	TCG->S	non-synonymous	alpha-mannosidase
Mb0667	744488	748135	2511	746998	A	G	CCA->P	CCG->P	synonymous	alpha-mannosidase
Mb0667	744488	748135	2627	747114	G	C	CGG->R	CCG->P	non-synonymous	alpha-mannosidase
Mb0682	757906	760269	1003	758908	C	A	CGC->R	AGC->S	non-synonymous	arylsulfatase
Mb0686	761576	765094	1303	762878	G	T	GAC->D	TAC->Y	non-synonymous	DNA-directed RNA polymerase subunit beta
Mb0686	761576	765094	1348	762923	T	G	TCG->S	GCG->A	non-synonymous	DNA-directed RNA polymerase subunit beta
Mb0687	765139	769089	146	765284	A	G	GAG->E	GGG->G	non-synonymous	DNA-directed RNA polymerase subunit beta'
Mb0688c	771366	769453	436	770931	G	A	CCG->P	TCG->S	non-synonymous	hydrolase
Mb0689	771561	772319	597	772157	A	G	GCA->A	GCG->A	synonymous	endonuclease IV
Mb0691	773253	774881	1413	774665	A	G	CTA->L	CTG->L	synonymous	acyl-CoA dehydrogenase
Mb0692	774892	775830	375	775266	C	A	TTC->F	TTA->L	non-synonymous	enoyl-CoA hydratase
Mb0695c	780249	777355	2299	777951	C	T	GAC->D	AAC->N	non-synonymous	transmembrane transport protein MmpL5
Mb0698c	781809	781312	426	781384	G	C	AAC->N	AAG->K	non-synonymous	hypothetical protein
Mb0703	784254	786359	513	784766	A	G	GCA->A	GCG->A	synonymous	elongation factor G
Mb0705	787918	788715	245	788162	G	T	AGC->S	ATC->I	non-synonymous	hypothetical protein
Mb0710c	793435	792839	418	793018	C	T	GCC->A	ACC->T	non-synonymous	transcriptional regulator
Mb0716	798702	800141	804	799505	C	T	CTC->L	CTT->L	synonymous	dehydrogenase
Mb0716	798702	800141	1423	800124	G	C	GCC->A	CCC->P	non-synonymous	dehydrogenase
Mb0719	801397	801618	38	801434	A	G	GAC->D	GGC->G	non-synonymous	hypothetical protein
Mb0724	804350	805192	648	804997	T	C	GGT->G	GGC->G	synonymous	50S ribosomal protein L2
Mb0731	808157	808603	120	808276	T	G	CTT->L	CTG->L	synonymous	arylsulfatase
Mb0731	808157	808603	445	808601	T	G	TAA->*	GAA->E	non-synonymous	arylsulfatase
Mb0734	811768	812709	942	812709	G	A	TAG->*	TAA->*	synonymous	transmembrane protein
Mb0736	813564	813881	12	813575	C	T	CAC->H	CAT->H	synonymous	50S ribosomal protein L24
Mb0743	816815	817012	111	816925	T	C	CGT->R	CGC->R	synonymous	50S ribosomal protein L30
Mb0744	817012	817452	47	817058	C	T	ACC->T	ATC->I	non-synonymous	50S ribosomal protein L15
Mb0745	817485	819356	189	817673	G	A	CGG->R	CGA->R	synonymous	endopeptidase IV
Mb0750	823329	824675	401	823729	C	T	CCG->P	CTG->L	non-synonymous	D-xylulose kinase XylB
Mb0754	827944	828489	60	828003	C	G	CTC->L	CTG->L	synonymous	adenylate kinase
Mb0760	832637	833485	754	833390	G	A	GTG->V	ATG->M	non-synonymous	hypothetical protein
Mb0761	833600	834127	426	834025	T	C	GAT->D	GAC->D	synonymous	hypothetical protein
Mb0761	833600	834127	471	834070	G	A	CAG->Q	CAA->Q	synonymous	hypothetical protein
Mb0766	836978	837505	458	837435	C	T	ACG->T	ATG->M	non-synonymous	hypothetical protein
Mb0767	837525	839918	128	837652	T	C	GTC->V	GCC->A	non-synonymous	PE-PGRS family protein
Mb0767	837525	839918	1784	839308	A	G	AAC->N	AGC->S	non-synonymous	PE-PGRS family protein
Mb0768	840317	843046	2668	842984	A	G	AGC->S	GGC->G	non-synonymous	PE-PGRS family protein
Mb0768	840317	843046	2669	842985	G	C	AGC->S	ACC->T	non-synonymous	PE-PGRS family protein
Mb0774c	846604	845432	556	846049	C	T	GTC->V	ATC->I	non-synonymous	acyl-CoA dehydrogenase
Mb0774c	846604	845432	206	846399	G	A	GCG->A	GTG->V	non-synonymous	acyl-CoA dehydrogenase
Mb0775c	848143	846611	1325	846819	C	A	GGG->G	GTG->V	non-synonymous	methylmalonate-semialdehyde dehydrogenase
Mb0777c	852230	850293	1634	850597	T	C	AAG->K	AGG->R	non-synonymous	PPE family protein
Mb0779c	853656	852931	363	853294	T	C	GCA->A	GCG->A	synonymous	hypothetical protein
Mb0781	854586	856043	211	854796	A	G	ATT->I	GTT->V	non-synonymous	two component system response sensor kinase membrane associated PHOR
Mb0781	854586	856043	212	854797	T	G	ATT->I	AGT->S	non-synonymous	two component system response sensor kinase membrane associated PHOR
Mb0783c	856875	856456	189	856687	A	G	TTT->F	TTC->F	synonymous	hypothetical protein
Mb0791	863101	864570	305	863405	T	G	CTC->L	CGC->R	non-synonymous	aldehyde dehydrogenase
Mb0792	864601	865347	164	864764	T	C	GTG->V	GCG->A	non-synonymous	short chain dehydrogenase
Mb0793	865445	866332	377	865821	G	T	GGC->G	GTC->V	non-synonymous	dehydrogenase/reductase
Mb0796c	869578	868040	1339	868240	G	A	CGC->R	TGC->C	non-synonymous	bifunctional cephalosporin acylase/gamma-glutamyltranspeptidase
Mb0797c	870540	869629	655	869886	C	A	GCC->A	TCC->S	non-synonymous	hypothetical protein
Mb0797c	870540	869629	425	870116	G	T	GCC->A	GAC->D	non-synonymous	hypothetical protein
Mb0797c	870540	869629	81	870460	C	T	GCG->A	GCA->A	synonymous	hypothetical protein
Mb0800	872197	873615	1264	873460	C	A	CCG->P	ACG->T	non-synonymous	adenylosuccinate lyase
Mb0804	876422	878581	1911	878332	G	T	ACG->T	ACT->T	synonymous	oligopeptidase B
Mb0805c	880631	879009	721	879911	A	G	TTG->L	CTG->L	synonymous	multidrug resistance integral membrane efflux protein EmrB
Mb0805c	880631	879009	720	879912	A	G	GGT->G	GGC->G	synonymous	multidrug resistance integral membrane efflux protein EmrB
Mb0820	891218	892312	162	891379	G	A	TGG->W	TGA->*	non-synonymous	IS1547 transposase
Mb0820	891218	892312	1017	892234	T	C	CAT->H	CAC->H	synonymous	IS1547 transposase
Mb0822c	894103	893096	858	893246	C	T	GTG->V	GTA->V	synonymous	hypothetical protein
Mb0824	895461	895808	258	895718	C	T	AGC->S	AGT->S	synonymous	hypothetical protein
Mb0829c	902160	900562	1116	901045	G	C	CGC->R	CGG->R	synonymous	UDP-glucose-4-epimerase CpsY
Mb0831	902941	904524	302	903242	T	C	GTC->V	GCC->A	non-synonymous	amidophosphoribosyltransferase
Mb0831	902941	904524	1401	904341	G	C	GTG->V	GTC->V	synonymous	amidophosphoribosyltransferase
Mb0831	902941	904524	1427	904367	G	T	CGG->R	CTG->L	non-synonymous	amidophosphoribosyltransferase
Mb0833c	905917	905735	6	905912	C	G	GGG->G	GGC->G	synonymous	hypothetical protein
Mb0837c	909313	909011	298	909016	T	C	ACC->T	GCC->A	non-synonymous	hypothetical protein
Mb0838c	910148	909315	153	909996	C	T	CTG->L	CTA->L	synonymous	thiosulfate sulfurtransferase
Mb0841	911802	912569	290	912091	C	T	CCC->P	CTC->L	non-synonymous	transcriptional regulator
Mb0843	913556	914332	105	913660	G	C	TTG->L	TTC->F	non-synonymous	phosphate transporter ATP-binding protein
Mb0843	913556	914332	549	914104	G	C	TCG->S	TCC->S	synonymous	phosphate transporter ATP-binding protein
Mb0845c	917141	915087	266	916876	G	T	CCC->P	CAC->H	non-synonymous	hypothetical protein
Mb0846c	918476	917307	988	917489	G	A	CTC->L	TTC->F	non-synonymous	transcriptional regulator
Mb0846c	918476	917307	960	917517	G	A	CTC->L	CTT->L	synonymous	transcriptional regulator
Mb0846c	918476	917307	933	917544	T	G	CTA->L	CTC->L	synonymous	transcriptional regulator
Mb0846c	918476	917307	388	918089	A	C	TGC->C	GGC->G	non-synonymous	transcriptional regulator
Mb0848c	920383	919742	203	920181	A	C	TTC->F	TGC->C	non-synonymous	hypothetical protein
Mb0849	920464	921519	198	920661	T	C	CGT->R	CGC->R	synonymous	hypothetical protein
Mb0849	920464	921519	290	920753	G	A	GGA->G	GAA->E	non-synonymous	hypothetical protein
Mb0849	920464	921519	881	921344	A	G	CAG->Q	CGG->R	non-synonymous	hypothetical protein
Mb0856	926191	928512	93	926283	C	T	GCC->A	GCT->A	synonymous	PE-PGRS family protein
Mb0856	926191	928512	2174	928364	C	A	GCC->A	GAC->D	non-synonymous	PE-PGRS family protein
Mb0857c	931234	928739	2088	929147	T	G	GGA->G	GGC->G	synonymous	PE-PGRS family protein
Mb0857c	931234	928739	738	930497	T	C	GCA->A	GCG->A	synonymous	PE-PGRS family protein
Mb0858	931702	932346	485	932186	G	A	GGC->G	GAC->D	non-synonymous	lipoprotein LpqQ
Mb0859c	933681	932959	681	933001	A	C	CCT->P	CCG->P	synonymous	hypothetical protein
Mb0860c	934780	933752	333	934448	T	G	GGA->G	GGC->G	synonymous	hypothetical protein
Mb0864	938348	938590	85	938432	T	G	TTT->F	GTT->V	non-synonymous	transmembrane protein
Mb0865	938867	940159	135	939001	G	A	CTG->L	CTA->L	synonymous	hypothetical protein
Mb0866	940143	941147	572	940714	G	A	GGC->G	GAC->D	non-synonymous	dehydrogenase
Mb0866	940143	941147	926	941068	A	C	GAC->D	GCC->A	non-synonymous	dehydrogenase
Mb0867c	941861	941211	505	941357	C	G	GGT->G	CGT->R	non-synonymous	nitrate/nitrite response transcriptional regulatory protein NarL
Mb0867c	941861	941211	217	941645	G	C	CCG->P	GCG->A	non-synonymous	nitrate/nitrite response transcriptional regulatory protein NarL
Mb0869c	944949	943435	1231	943719	G	A	CAC->H	TAC->Y	non-synonymous	oxidase
Mb0870	945098	945490	383	945480	T	C	GTT->V	GCT->A	non-synonymous	lipoprotein LpqS
Mb0871	945693	946811	410	946102	G	T	GGG->G	GTG->V	non-synonymous	cysteine synthase A CysK2
Mb0872	946811	948070	1212	948022	T	C	TTT->F	TTC->F	synonymous	integral membrane transport protein
Mb0872	946811	948070	1239	948049	C	T	GGC->G	GGT->G	synonymous	integral membrane transport protein
Mb0874c	949223	948396	250	948974	A	C	TTC->F	GTC->V	non-synonymous	short chain dehydrogenase
Mb0874c	949223	948396	175	949049	C	T	GGC->G	AGC->S	non-synonymous	short chain dehydrogenase
Mb0878	952387	953466	71	952457	C	T	GCC->A	GTC->V	non-synonymous	fatty-acid-CoA racemase
Mb0881c	955674	954481	820	954855	C	T	GCC->A	ACC->T	non-synonymous	aminotransferase
Mb0881c	955674	954481	453	955222	C	G	GCG->A	GCC->A	synonymous	aminotransferase
Mb0883	957047	959209	1671	958717	A	G	TTA->L	TTG->L	synonymous	fatty oxidation protein FadB
Mb0883	957047	959209	2101	959147	A	G	ACC->T	GCC->A	non-synonymous	fatty oxidation protein FadB
Mb0884c	960905	959277	773	960133	G	A	GCC->A	GTC->V	non-synonymous	DNA helicase
Mb0894c	968193	967804	205	967989	T	C	AGC->S	GGC->G	non-synonymous	hypothetical protein
Mb0896c	970710	968884	483	970228	C	G	GGG->G	GGC->G	synonymous	PE-PGRS family protein
Mb0896c	970710	968884	339	970372	A	G	CTT->L	CTC->L	synonymous	PE-PGRS family protein
Mb0897	970971	972923	1398	972368	A	G	GGA->G	GGG->G	synonymous	acyl-CoA dehydrogenase
Mb0898c	974172	973012	727	973446	C	T	GGC->G	AGC->S	non-synonymous	hypothetical protein
Mb0898c	974172	973012	36	974137	A	G	GAT->D	GAC->D	synonymous	hypothetical protein
Mb0899c	974760	974272	157	974604	G	A	CTG->L	TTG->L	synonymous	hypothetical protein
Mb0900c	976403	974757	77	976327	C	T	GGC->G	GAC->D	non-synonymous	transmembrane protein
Mb0914c	993061	990413	701	992361	T	C	GAG->E	GGG->G	non-synonymous	LuxR family transcriptional regulator
Mb0917c	996760	995783	91	996670	T	C	AAG->K	GAG->E	non-synonymous	hypothetical protein
Mb0918	996989	998170	459	997447	G	A	GCG->A	GCA->A	synonymous	LuxR family transcriptional regulator
Mb0920	999937	1001232	1261	1001197	G	A	GCG->A	ACG->T	non-synonymous	type II citrate synthase
Mb0929	1008672	1009403	424	1009095	G	A	GTT->V	ATT->I	non-synonymous	enoyl-CoA hydratase
Mb0930	1009409	1010527	774	1010182	T	C	GGT->G	GGC->G	synonymous	hypothetical protein
Mb0930	1009409	1010527	1014	1010422	A	G	CTA->L	CTG->L	synonymous	hypothetical protein
Mb0931	1010650	1012200	917	1011566	T	C	CTC->L	CCC->P	non-synonymous	hypothetical protein
Mb0931	1010650	1012200	1328	1011977	A	C	TAC->Y	TCC->S	non-synonymous	hypothetical protein
Mb0933	1015147	1015326	135	1015281	G	T	CAG->Q	CAT->H	non-synonymous	hypothetical protein
Mb0937c	1019191	1017683	698	1018494	A	G	CTG->L	CCG->P	non-synonymous	dioxygenase
Mb0944c	1027282	1025963	747	1026536	T	G	GAA->E	GAC->D	non-synonymous	transposase
Mb0945	1027570	1028151	342	1027911	C	G	GTC->V	GTG->V	synonymous	resolvase
Mb0946	1028151	1029803	533	1028683	G	A	GGC->G	GAC->D	non-synonymous	transposase
Mb0947c	1031043	1029979	642	1030402	G	A	CGC->R	CGT->R	synonymous	hypothetical protein
Mb0950c	1035096	1034305	394	1034703	G	A	CTG->L	TTG->L	synonymous	short chain dehydrogenase
Mb0956c	1041514	1040402	798	1040717	C	A	CCG->P	CCT->P	synonymous	periplasmic phosphate-binding lipoprotein PSTS2
Mb0956c	1041514	1040402	343	1041172	C	A	GCG->A	TCG->S	non-synonymous	periplasmic phosphate-binding lipoprotein PSTS2
Mb0959	1042582	1043706	1055	1043636	C	T	GCT->A	GTT->V	non-synonymous	periplasmic phosphate-binding lipoprotein PSTS1
Mb0963	1046603	1048882	1692	1048294	T	C	CTT->L	CTC->L	synonymous	ATP-dependent DNA ligase
Mb0969	1054232	1054708	372	1054603	T	C	ACT->T	ACC->T	synonymous	formamidopyrimidine-DNA glycosylase
Mb0976	1062431	1063594	782	1063212	C	T	GCG->A	GTG->V	non-synonymous	succinyl-CoA synthetase subunit beta
Mb0977	1063607	1064518	626	1064232	A	G	AAG->K	AGG->R	non-synonymous	succinyl-CoA synthetase subunit alpha
Mb0984	1071694	1073712	712	1072405	A	G	AAC->N	GAC->D	non-synonymous	hypothetical protein
Mb0990c	1077636	1077217	318	1077319	C	T	GCG->A	GCA->A	synonymous	hypothetical protein
Mb0990c	1077636	1077217	281	1077356	T	C	CAC->H	CGC->R	non-synonymous	hypothetical protein
Mb0991c	1078274	1077672	556	1077719	C	A	GGG->G	TGG->W	non-synonymous	hypothetical protein
Mb0997c	1084189	1083023	708	1083482	A	C	CAT->H	CAG->Q	non-synonymous	acyl-CoA dehydrogenase
Mb0998c	1086189	1084186	658	1085532	A	T	TTT->F	ATT->I	non-synonymous	acetyl-/propionyl-coenzyme A carboxylase subunit alpha
Mb1002	1090812	1093583	688	1091499	G	T	GGG->G	TGG->W	non-synonymous	PE-PGRS family protein
Mb1003c	1094807	1093800	217	1094591	C	G	GAA->E	CAA->Q	non-synonymous	PE-PGRS family protein
Mb1003c	1094807	1093800	153	1094655	C	G	GCG->A	GCC->A	synonymous	PE-PGRS family protein
Mb1003c	1094807	1093800	119	1094689	A	G	GTC->V	GCC->A	non-synonymous	PE-PGRS family protein
Mb1003c	1094807	1093800	54	1094754	C	T	GCG->A	GCA->A	synonymous	PE-PGRS family protein
Mb1006c	1096902	1095529	217	1096686	C	G	GAA->E	CAA->Q	non-synonymous	PE-PGRS family protein
Mb1006c	1096902	1095529	213	1096690	G	A	TAC->Y	TAT->Y	synonymous	PE-PGRS family protein
Mb1006c	1096902	1095529	153	1096750	C	G	GCG->A	GCC->A	synonymous	PE-PGRS family protein
Mb1006c	1096902	1095529	129	1096774	T	G	CAA->Q	CAC->H	non-synonymous	PE-PGRS family protein
Mb1006c	1096902	1095529	54	1096849	C	T	GCG->A	GCA->A	synonymous	PE-PGRS family protein
Mb1007	1097267	1097959	208	1097474	A	G	AGC->S	GGC->G	non-synonymous	two component response transcriptional regulatory protein MprA
Mb1007	1097267	1097959	405	1097671	C	T	TCC->S	TCT->S	synonymous	two component response transcriptional regulatory protein MprA
Mb1007	1097267	1097959	627	1097893	C	T	GAC->D	GAT->D	synonymous	two component response transcriptional regulatory protein MprA
Mb1012	1102254	1103000	315	1102568	G	A	GTG->V	GTA->V	synonymous	adhesion component transport ATP-binding protein ABC transporter
Mb1012	1102254	1103000	666	1102919	C	A	GGC->G	GGA->G	synonymous	adhesion component transport ATP-binding protein ABC transporter
Mb1012	1102254	1103000	682	1102935	T	G	TTG->L	GTG->V	non-synonymous	adhesion component transport ATP-binding protein ABC transporter
Mb1013	1102993	1104264	105	1103097	G	A	GCG->A	GCA->A	synonymous	adhesion component transport transmembrane protein
Mb1013	1102993	1104264	999	1103991	T	C	GGT->G	GGC->G	synonymous	adhesion component transport transmembrane protein
Mb1013	1102993	1104264	1115	1104107	C	T	GCC->A	GTC->V	non-synonymous	adhesion component transport transmembrane protein
Mb1013	1102993	1104264	1271	1104263	A	G	TAG->*	TGG->W	non-synonymous	adhesion component transport transmembrane protein
Mb1014	1104265	1105560	1260	1105524	G	A	GGG->G	GGA->G	synonymous	adhesion component transport transmembrane protein
Mb1015	1105567	1106727	169	1105735	A	G	ATT->I	GTT->V	non-synonymous	hypothetical protein
Mb1015	1105567	1106727	403	1105969	G	T	GAT->D	TAT->Y	non-synonymous	hypothetical protein
Mb1015	1105567	1106727	571	1106137	C	G	CTG->L	GTG->V	non-synonymous	hypothetical protein
Mb1015	1105567	1106727	572	1106138	T	C	CTG->L	CCG->P	non-synonymous	hypothetical protein
Mb1019c	1109622	1109029	9	1109614	G	C	ATC->I	ATG->M	non-synonymous	hypothetical protein
Mb1021	1110720	1112000	688	1111407	G	T	GGT->G	TGT->C	non-synonymous	molybdopterin biosynthesis protein MoeA1
Mb1022	1112063	1112674	67	1112129	G	A	GGC->G	AGC->S	non-synonymous	ribosomal-protein-alanine acetyltransferase
Mb1023	1112835	1113911	275	1113109	G	A	GGC->G	GAC->D	non-synonymous	transmembrane protein
Mb1023	1112835	1113911	907	1113741	C	G	CAG->Q	GAG->E	non-synonymous	transmembrane protein
Mb1027c	1117599	1116982	342	1117258	G	A	TAC->Y	TAT->Y	synonymous	hypothetical protein
Mb1028	1117636	1118844	695	1118330	A	C	GAG->E	GCG->A	non-synonymous	arginine deiminase
Mb1029c	1120390	1118879	343	1120048	G	C	CTC->L	GTC->V	non-synonymous	hypothetical protein
Mb1032c	1124109	1122673	62	1124048	G	A	TCG->S	TTG->L	non-synonymous	aminodeoxychorismate synthase component I
Mb1033	1124165	1125868	74	1124238	G	A	AGC->S	AAC->N	non-synonymous	hypothetical protein
Mb1033	1124165	1125868	1603	1125767	T	C	TCC->S	CCC->P	non-synonymous	hypothetical protein
Mb1035	1127540	1128334	405	1127944	T	C	AAT->N	AAC->N	synonymous	deoxyribonuclease TatD (YjjV protein)
Mb1036	1128542	1129630	793	1129334	G	A	GTG->V	ATG->M	non-synonymous	resuscitation-promoting factor rpfB
Mb1036	1128542	1129630	845	1129386	A	G	GAA->E	GGA->G	non-synonymous	resuscitation-promoting factor rpfB
Mb1036	1128542	1129630	1070	1129611	T	C	GTA->V	GCA->A	non-synonymous	resuscitation-promoting factor rpfB
Mb1037	1129603	1130556	9	1129611	T	C	TGT->C	TGC->C	synonymous	dimethyladenosine transferase
Mb1040	1131559	1131873	194	1131752	A	G	AAC->N	AGC->S	non-synonymous	hypothetical protein
Mb1046c	1138507	1137020	736	1137772	G	C	CAG->Q	GAG->E	non-synonymous	bifunctional N-acetylglucosamine-1-phosphate uridyltransferase/glucosamine-1-phosphate acetyltransferase
Mb1046c	1138507	1137020	479	1138029	C	T	GGA->G	GAA->E	non-synonymous	bifunctional N-acetylglucosamine-1-phosphate uridyltransferase/glucosamine-1-phosphate acetyltransferase
Mb1048	1139414	1143118	48	1139461	T	C	CTT->L	CTC->L	synonymous	transcription-repair coupling factor
Mb1050	1144183	1144914	97	1144279	C	A	CCC->P	ACC->T	non-synonymous	lipoprotein LpqU
Mb1051	1145011	1146300	1285	1146295	A	C	AAA->K	CAA->Q	non-synonymous	phosphopyruvate hydratase
Mb1055c	1149554	1148874	178	1149377	C	T	GGT->G	AGT->S	non-synonymous	transcriptional regulator KdpE
Mb1056c	1152133	1149551	2559	1149575	T	C	CTA->L	CTG->L	synonymous	sensor protein KDPD
Mb1056c	1152133	1149551	884	1151250	T	C	GAC->D	GGC->G	non-synonymous	sensor protein KDPD
Mb1056c	1152133	1149551	633	1151501	C	G	TCG->S	TCC->S	synonymous	sensor protein KDPD
Mb1060	1156300	1156869	82	1156381	A	G	ACC->T	GCC->A	non-synonymous	potassium-transporting ATPase subunit C
Mb1072c	1167254	1166229	787	1166468	A	C	TGC->C	GGC->G	non-synonymous	hypothetical protein
Mb1072c	1167254	1166229	295	1166960	T	C	ACG->T	GCG->A	non-synonymous	hypothetical protein
Mb1074	1168121	1169002	310	1168430	G	T	GGG->G	TGG->W	non-synonymous	hypothetical protein
Mb1075c	1169677	1169084	453	1169225	T	G	AGA->R	AGC->S	non-synonymous	hypothetical protein
Mb1076	1169872	1171119	25	1169896	A	G	ACC->T	GCC->A	non-synonymous	IS1081 transposase
Mb1076	1169872	1171119	510	1170381	G	A	GTG->V	GTA->V	synonymous	IS1081 transposase
Mb1077c	1172602	1171487	69	1172534	C	A	GAG->E	GAT->D	non-synonymous	hypothetical protein
Mb1078	1172835	1173281	398	1173232	T	C	GTG->V	GCG->A	non-synonymous	transcriptional repressor
Mb1079	1173329	1174234	870	1174198	G	T	GCG->A	GCT->A	synonymous	oxidoreductase
Mb1083	1177376	1177690	230	1177605	G	A	GGC->G	GAC->D	non-synonymous	integrase (fragment)
Mb1085	1178076	1178840	12	1178087	T	C	GAT->D	GAC->D	synonymous	hypothetical protein
Mb1096c	1190884	1188869	1180	1189705	T	C	ATG->M	GTG->V	non-synonymous	PE-PGRS family protein
Mb1096c	1190884	1188869	988	1189897	C	T	GGC->G	AGC->S	non-synonymous	PE-PGRS family protein
Mb1097c	1193508	1191217	332	1193177	C	A	TGG->W	TTG->L	non-synonymous	PE-PGRS family protein
Mb1097c	1193508	1191217	288	1193221	C	T	GAG->E	GAA->E	synonymous	PE-PGRS family protein
Mb1103c	1200733	1199516	1098	1199636	A	G	GGT->G	GGC->G	synonymous	acetyl-CoA acetyltransferase
Mb1105	1202127	1203020	815	1202941	A	C	CAG->Q	CCG->P	non-synonymous	lipase LIPU
Mb1107	1204673	1205395	512	1205184	C	T	ACC->T	ATC->I	non-synonymous	hypothetical protein
Mb1109c	1207158	1206664	291	1206868	A	G	AAT->N	AAC->N	synonymous	transcription elongation factor GreA
Mb1116	1212920	1215244	873	1213792	C	A	GGC->G	GGA->G	synonymous	PE-PGRS family protein
Mb1116	1212920	1215244	1593	1214512	T	C	GGT->G	GGC->G	synonymous	PE-PGRS family protein
Mb1120	1216980	1217435	144	1217123	G	A	CAG->Q	CAA->Q	synonymous	endo-1,4-beta-glucanase
Mb1120	1216980	1217435	145	1217124	C	A	CAG->Q	AAG->K	non-synonymous	endo-1,4-beta-glucanase
Mb1121	1217850	1220402	597	1218446	C	A	GCC->A	GCA->A	synonymous	PE-PGRS family protein
Mb1121	1217850	1220402	689	1218538	A	C	GAC->D	GCC->A	non-synonymous	PE-PGRS family protein
Mb1121	1217850	1220402	2181	1220030	G	C	GGG->G	GGC->G	synonymous	PE-PGRS family protein
Mb1121	1217850	1220402	2419	1220268	G	A	GGC->G	AGC->S	non-synonymous	PE-PGRS family protein
Mb1126	1225757	1226632	814	1226570	T	C	TCC->S	CCC->P	non-synonymous	glycosyl hydrolase
Mb1127c	1227516	1226635	68	1227449	A	G	CTG->L	CCG->P	non-synonymous	hypothetical protein
Mb1129c	1229954	1228968	753	1229202	G	T	ACC->T	ACA->T	synonymous	fructose 1,6-bisphosphatase II
Mb1131c	1231791	1230763	945	1230847	G	T	GAC->D	GAA->E	non-synonymous	hypothetical protein
Mb1138c	1236831	1235584	804	1236028	A	G	GAT->D	GAC->D	synonymous	exodeoxyribonuclease VII large subunit
Mb1138c	1236831	1235584	15	1236817	C	T	TCG->S	TCA->S	synonymous	exodeoxyribonuclease VII large subunit
Mb1142	1239626	1240699	229	1239854	A	G	ATC->I	GTC->V	non-synonymous	GTP-dependent nucleic acid-binding protein EngD
Mb1145	1241558	1242256	55	1241612	C	T	CCC->P	TCC->S	non-synonymous	hypothetical protein
Mb1151c	1244875	1244381	158	1244718	G	C	GCC->A	GGC->G	non-synonymous	hypothetical protein
Mb1152	1245078	1246478	687	1245764	G	C	GTG->V	GTC->V	synonymous	glucose-6-phosphate 1-dehydrogenase
Mb1158c	1252775	1251303	1048	1251728	G	T	CCG->P	ACG->T	non-synonymous	pyruvate phosphate dikinase
Mb1161	1255926	1257506	28	1255953	C	T	CTT->L	TTT->F	non-synonymous	hypothetical protein
Mb1161	1255926	1257506	71	1255996	G	A	CGG->R	CAG->Q	non-synonymous	hypothetical protein
Mb1161	1255926	1257506	1458	1257383	T	G	CGT->R	CGG->R	synonymous	hypothetical protein
Mb1162	1257503	1258684	782	1258284	A	T	AAC->N	ATC->I	non-synonymous	citrate synthase
Mb1163	1258696	1260426	527	1259222	T	C	ATG->M	ACG->T	non-synonymous	hypothetical protein
Mb1164c	1262717	1260438	810	1261908	T	C	CTA->L	CTG->L	synonymous	5-methyltetrahydropteroyltriglutamate/homocysteine S-methyltransferase
Mb1172	1268718	1269566	251	1268968	G	A	GGC->G	GAC->D	non-synonymous	hypothetical protein
Mb1179c	1279120	1277672	1161	1277960	C	G	GCG->A	GCC->A	synonymous	hypothetical protein
Mb1179c	1279120	1277672	1066	1278055	T	G	AAC->N	CAC->H	non-synonymous	hypothetical protein
Mb1179c	1279120	1277672	1065	1278056	G	C	GCC->A	GCG->A	synonymous	hypothetical protein
Mb1179c	1279120	1277672	1060	1278061	G	T	CAC->H	AAC->N	non-synonymous	hypothetical protein
Mb1179c	1279120	1277672	907	1278214	G	A	CTG->L	TTG->L	synonymous	hypothetical protein
Mb1179c	1279120	1277672	906	1278215	G	C	GGC->G	GGG->G	synonymous	hypothetical protein
Mb1179c	1279120	1277672	903	1278218	C	G	CGG->R	CGC->R	synonymous	hypothetical protein
Mb1179c	1279120	1277672	896	1278225	G	C	GCG->A	GGG->G	non-synonymous	hypothetical protein
Mb1179c	1279120	1277672	889	1278232	A	G	TTG->L	CTG->L	synonymous	hypothetical protein
Mb1179c	1279120	1277672	888	1278233	A	T	TTT->F	TTA->L	non-synonymous	hypothetical protein
Mb1179c	1279120	1277672	885	1278236	C	A	GCG->A	GCT->A	synonymous	hypothetical protein
Mb1179c	1279120	1277672	884	1278237	G	C	GCG->A	GGG->G	non-synonymous	hypothetical protein
Mb1179c	1279120	1277672	882	1278239	A	G	GAT->D	GAC->D	synonymous	hypothetical protein
Mb1179c	1279120	1277672	876	1278245	A	G	AAT->N	AAC->N	synonymous	hypothetical protein
Mb1179c	1279120	1277672	874	1278247	T	G	AAT->N	CAT->H	non-synonymous	hypothetical protein
Mb1179c	1279120	1277672	873	1278248	G	T	CGC->R	CGA->R	synonymous	hypothetical protein
Mb1179c	1279120	1277672	867	1278254	C	G	GCG->A	GCC->A	synonymous	hypothetical protein
Mb1179c	1279120	1277672	864	1278257	C	T	CAG->Q	CAA->Q	synonymous	hypothetical protein
Mb1180	1279265	1279672	386	1279650	G	A	GGA->G	GAA->E	non-synonymous	transposase
Mb1184c	1282218	1281370	158	1282061	C	T	GGC->G	GAC->D	non-synonymous	O-methyltransferase
Mb1184c	1282218	1281370	106	1282113	T	C	ACC->T	GCC->A	non-synonymous	O-methyltransferase
Mb1190	1286364	1287659	10	1286373	A	C	ACC->T	CCC->P	non-synonymous	mannosyltransferase
Mb1192	1287967	1288392	172	1288138	G	C	GGA->G	CGA->R	non-synonymous	7,8-dihydro-8-oxoguanine-triphosphatase
Mb1193	1288700	1292398	1371	1290070	G	A	GGG->G	GGA->G	synonymous	respiratory nitrate reductase subunit alpha NarG
Mb1193	1288700	1292398	1372	1290071	C	G	CTG->L	GTG->V	non-synonymous	respiratory nitrate reductase subunit alpha NarG
Mb1193	1288700	1292398	2462	1291161	G	A	GGC->G	GAC->D	non-synonymous	respiratory nitrate reductase subunit alpha NarG
Mb1195	1294170	1294775	536	1294705	C	G	CCG->P	CGG->R	non-synonymous	respiratory nitrate reductase subunit delta NarJ
Mb1196	1294778	1295518	599	1295376	T	C	GTG->V	GCG->A	non-synonymous	respiratory nitrate reductase subunit gamma NarI
Mb1197	1295540	1297426	231	1295770	T	C	GAT->D	GAC->D	synonymous	GTP-binding translation elongation factor TypA
Mb1201c	1301177	1300635	500	1300678	G	A	CCC->P	CTC->L	non-synonymous	hypothetical protein
Mb1203	1301677	1302588	486	1302162	T	C	GGT->G	GGC->G	synonymous	N-Acetyl-1-D-myo-Inosityl-2-amino-2-deoxy-alpha- D-glucopyranoside deacetylase MshB
Mb1205c	1304054	1303128	399	1303656	G	T	CAC->H	CAA->Q	non-synonymous	PE family protein
Mb1208c	1309475	1307451	1946	1307530	C	A	AGC->S	ATC->I	non-synonymous	NADPH dependent 2,4-dienoyl-CoA reductase
Mb1208c	1309475	1307451	269	1309207	T	G	AAC->N	ACC->T	non-synonymous	NADPH dependent 2,4-dienoyl-CoA reductase
Mb1211	1310613	1311701	953	1311565	T	C	GTC->V	GCC->A	non-synonymous	N-succinyldiaminopimelate aminotransferase
Mb1213	1314975	1321232	3203	1318177	C	A	GCC->A	GAC->D	non-synonymous	polyketide beta-ketoacyl synthase
Mb1213	1314975	1321232	3931	1318905	C	T	CTG->L	TTG->L	synonymous	polyketide beta-ketoacyl synthase
Mb1214	1321285	1322703	554	1321838	T	C	ATG->M	ACG->T	non-synonymous	polyketide synthase
Mb1215	1322770	1325778	1222	1323991	A	G	ACT->T	GCT->A	non-synonymous	transmembrane transport protein MmpL10
Mb1216c	1326861	1325782	1047	1325815	A	G	CGT->R	CGC->R	synonymous	hypothetical protein
Mb1218c	1330555	1328939	72	1330484	G	A	GAC->D	GAT->D	synonymous	hypothetical protein
Mb1222	1334230	1335108	690	1334919	T	G	GGT->G	GGG->G	synonymous	hypothetical protein
Mb1222	1334230	1335108	835	1335064	T	C	TTG->L	CTG->L	synonymous	hypothetical protein
Mb1225	1337044	1338465	371	1337414	C	T	CCG->P	CTG->L	non-synonymous	acyl-CoA synthetase
Mb1226c	1339763	1338498	706	1339058	C	G	GTG->V	CTG->L	non-synonymous	hypothetical protein
Mb1228	1340599	1341771	704	1341302	T	G	CTG->L	CGG->R	non-synonymous	PPE family protein
Mb1228	1340599	1341771	745	1341343	G	A	GTG->V	ATG->M	non-synonymous	PPE family protein
Mb1228	1340599	1341771	822	1341420	T	C	GCT->A	GCC->A	synonymous	PPE family protein
Mb1228	1340599	1341771	832	1341430	G	C	GAA->E	CAA->Q	non-synonymous	PPE family protein
Mb1228	1340599	1341771	857	1341455	G	A	CGG->R	CAG->Q	non-synonymous	PPE family protein
Mb1229	1341906	1342202	9	1341914	G	A	TCG->S	TCA->S	synonymous	ESAT-6 like protein 3
Mb1229	1341906	1342202	120	1342025	C	T	ATC->I	ATT->I	synonymous	ESAT-6 like protein 3
Mb1229	1341906	1342202	123	1342028	G	C	TCG->S	TCC->S	synonymous	ESAT-6 like protein 3
Mb1229	1341906	1342202	126	1342031	C	T	GGC->G	GGT->G	synonymous	ESAT-6 like protein 3
Mb1229	1341906	1342202	172	1342077	A	G	ACC->T	GCC->A	non-synonymous	ESAT-6 like protein 3
Mb1230	1342253	1342537	35	1342287	A	C	GAT->D	GCT->A	non-synonymous	ESAT-6 like protein 4
Mb1230	1342253	1342537	39	1342291	T	C	CAT->H	CAC->H	synonymous	ESAT-6 like protein 4
Mb1230	1342253	1342537	204	1342456	T	C	GCT->A	GCC->A	synonymous	ESAT-6 like protein 4
Mb1231c	1343852	1342605	510	1343343	C	T	GTG->V	GTA->V	synonymous	transposase
Mb1231c	1343852	1342605	129	1343724	A	G	GCT->A	GCC->A	synonymous	transposase
Mb1231c	1343852	1342605	25	1343828	T	C	ACC->T	GCC->A	non-synonymous	transposase
Mb1233c	1346416	1345463	429	1345988	G	A	TAC->Y	TAT->Y	synonymous	transferase
Mb1236c	1349871	1348183	1452	1348420	T	C	CTA->L	CTG->L	synonymous	hypothetical protein
Mb1238	1350579	1352372	402	1350980	G	C	GAG->E	GAC->D	non-synonymous	long-chain-acyl-CoA synthetase
Mb1239	1352438	1353394	217	1352654	C	G	CGG->R	GGG->G	non-synonymous	dihydropteroate synthase 2 FolP2
Mb1244c	1356908	1355745	313	1356596	T	C	ATT->I	GTT->V	non-synonymous	glycosyl transferase family protein
Mb1245	1357083	1358297	102	1357184	T	C	TTT->F	TTC->F	synonymous	glucose-1-phosphate adenylyltransferase
Mb1246c	1358867	1358493	313	1358555	T	G	ACT->T	CCT->P	non-synonymous	PE family protein
Mb1247c	1360686	1359001	505	1360182	A	C	TCA->S	GCA->A	non-synonymous	hypothetical protein
Mb1249c	1363043	1361397	612	1362432	G	A	AGC->S	AGT->S	synonymous	tetronasin-transport integral membrane protein ABC transporter
Mb1249c	1363043	1361397	517	1362527	C	T	GCT->A	ACT->T	non-synonymous	tetronasin-transport integral membrane protein ABC transporter
Mb1249c	1363043	1361397	427	1362617	T	C	ACC->T	GCC->A	non-synonymous	tetronasin-transport integral membrane protein ABC transporter
Mb1255	1367119	1368705	862	1367980	C	T	CTC->L	TTC->F	non-synonymous	serine protease HtrA
Mb1255	1367119	1368705	1334	1368452	A	G	AAC->N	AGC->S	non-synonymous	serine protease HtrA
Mb1258c	1371539	1370076	1349	1370191	G	A	GCG->A	GTG->V	non-synonymous	hypothetical protein
Mb1262c	1375441	1374206	289	1375153	G	A	CCG->P	TCG->S	non-synonymous	hypothetical protein
Mb1264c	1377412	1376105	1125	1376288	C	G	GCG->A	GCC->A	synonymous	hypothetical protein
Mb1265c	1378070	1377474	203	1377868	T	C	GAC->D	GGC->G	non-synonymous	hypothetical protein
Mb1265c	1378070	1377474	136	1377935	C	T	GAC->D	AAC->N	non-synonymous	hypothetical protein
Mb1266	1378220	1378747	165	1378384	G	A	GAG->E	GAA->E	synonymous	hypothetical protein
Mb1271c	1384286	1383186	584	1383703	C	T	CGC->R	CAC->H	non-synonymous	magnesium/cobalt transporter CorA
Mb1276	1388101	1388961	66	1388166	T	C	GGT->G	GGC->G	synonymous	lipoprotein LPQZ
Mb1276	1388101	1388961	724	1388824	A	C	AAA->K	CAA->Q	non-synonymous	lipoprotein LPQZ
Mb1280c	1394296	1390601	3083	1391214	C	T	CGG->R	CAG->Q	non-synonymous	alpha-ketoglutarate decarboxylase
Mb1280c	1394296	1390601	2964	1391333	T	C	GCA->A	GCG->A	synonymous	alpha-ketoglutarate decarboxylase
Mb1280c	1394296	1390601	50	1394247	G	T	GCG->A	GAG->E	non-synonymous	alpha-ketoglutarate decarboxylase
Mb1281c	1395226	1394438	283	1394944	T	C	ACG->T	GCG->A	non-synonymous	hypothetical protein
Mb1282	1395423	1397162	832	1396254	G	A	GGG->G	AGG->R	non-synonymous	drug-transport integral membrane protein
Mb1283c	1400484	1397065	2040	1398445	G	A	AAC->N	AAT->N	synonymous	hypothetical protein
Mb1285	1401214	1402905	427	1401640	G	A	GTG->V	ATG->M	non-synonymous	cold-shock DEAD-box protein A
Mb1288c	1405577	1404318	1036	1404542	C	T	GGC->G	AGC->S	non-synonymous	integral membrane transport protein
Mb1289	1405576	1406475	816	1406391	G	A	CAG->Q	CAA->Q	synonymous	hypothetical protein
Mb1293c	1408608	1408174	311	1408298	C	G	CGG->R	CCG->P	non-synonymous	HIT-like protein
Mb1295	1410130	1411323	610	1410739	T	C	TGT->C	CGT->R	non-synonymous	adenylyl cyclase
Mb1297c	1413986	1412196	1191	1412796	T	C	CGA->R	CGG->R	synonymous	Ser/Thr protein kinase
Mb1297c	1413986	1412196	1187	1412800	T	A	AAC->N	ATC->I	non-synonymous	Ser/Thr protein kinase
Mb1297c	1413986	1412196	1098	1412889	T	C	CCA->P	CCG->P	synonymous	Ser/Thr protein kinase
Mb1297c	1413986	1412196	744	1413243	G	C	GCC->A	GCG->A	synonymous	Ser/Thr protein kinase
Mb1301c	1417894	1417160	400	1417495	T	C	ACC->T	GCC->A	non-synonymous	lipoprotein LPRA
Mb1304c	1422196	1420448	225	1421972	T	C	GCA->A	GCG->A	synonymous	drugs-transport transmembrane ATP-binding protein ABC transporter
Mb1305	1422343	1422900	503	1422845	C	T	CCG->P	CTG->L	non-synonymous	lipoprotein LPRB
Mb1307c	1424060	1423584	274	1423787	A	T	TCA->S	ACA->T	non-synonymous	hypothetical protein
Mb1309	1425560	1428187	63	1425622	T	C	TTT->F	TTC->F	synonymous	hypothetical protein
Mb1309	1425560	1428187	1702	1427261	A	G	ATC->I	GTC->V	non-synonymous	hypothetical protein
Mb1315	1435470	1435961	115	1435584	A	C	AGG->R	CGG->R	synonymous	hypothetical protein
Mb1317	1437053	1438897	733	1437785	T	G	TTG->L	GTG->V	non-synonymous	bifunctional sulfate adenylyltransferase subunit 1/adenylylsulfate kinase
Mb1317	1437053	1438897	1032	1438084	T	C	CGT->R	CGC->R	synonymous	bifunctional sulfate adenylyltransferase subunit 1/adenylylsulfate kinase
Mb1329	1451253	1453061	1608	1452860	T	C	AAT->N	AAC->N	synonymous	transcription termination factor Rho
Mb1333	1455607	1456260	519	1456125	G	T	GGG->G	GGT->G	synonymous	hypothetical protein
Mb1333	1455607	1456260	587	1456193	A	C	CAG->Q	CCG->P	non-synonymous	hypothetical protein
Mb1334	1456344	1457558	1070	1457413	G	T	GGT->G	GTT->V	non-synonymous	undecapaprenyl-phosphate alpha-n-acetylglucosaminyltransferase rfe
Mb1336	1458293	1459045	423	1458715	T	C	GTT->V	GTC->V	synonymous	ATP synthase F0F1 subunit A
Mb1339	1459892	1461232	378	1460269	C	G	GTC->V	GTG->V	synonymous	ATP synthase F0F1 subunit delta
Mb1344	1465737	1466171	8	1465744	T	C	GTG->V	GCG->A	non-synonymous	hypothetical protein
Mb1344	1465737	1466171	48	1465784	A	G	GGA->G	GGG->G	synonymous	hypothetical protein
Mb1345c	1466949	1466218	695	1466255	A	C	CTG->L	CGG->R	non-synonymous	hypothetical protein
Mb1345c	1466949	1466218	444	1466506	A	G	GGT->G	GGC->G	synonymous	hypothetical protein
Mb1345c	1466949	1466218	411	1466539	C	A	CTG->L	CTT->L	synonymous	hypothetical protein
Mb1346c	1467541	1466924	580	1466962	T	C	AGC->S	GGC->G	non-synonymous	hypothetical protein
Mb1348	1468357	1469613	897	1469253	T	C	TTT->F	TTC->F	synonymous	UDP-N-acetylglucosamine 1-carboxyvinyltransferase
Mb1349c	1475666	1475169	36	1475631	C	T	GGG->G	GGA->G	synonymous	methylated-DNA--protein-cysteine methyltransferase
Mb1350c	1476913	1475663	1145	1475769	A	C	GTG->V	GGG->G	non-synonymous	methylated-DNA--protein-cysteine methyltransferase
Mb1350c	1476913	1475663	567	1476347	T	C	CTA->L	CTG->L	synonymous	methylated-DNA--protein-cysteine methyltransferase
Mb1351c	1477153	1476917	236	1476918	T	C	TAG->*	TGG->W	non-synonymous	methylated-DNA--protein-cysteine methyltransferase
Mb1360c	1488000	1486189	958	1487043	C	T	GCC->A	ACC->T	non-synonymous	PE-PGRS family protein
Mb1361c	1490347	1488152	1402	1488946	A	G	TCG->S	CCG->P	non-synonymous	glycogen branching protein
Mb1361c	1490347	1488152	119	1490229	C	T	GGC->G	GAC->D	non-synonymous	glycogen branching protein
Mb1362c	1492460	1490355	1821	1490640	T	C	GCA->A	GCG->A	synonymous	glucanase GLGE
Mb1363	1492599	1495190	1595	1494193	G	A	GGT->G	GAT->D	non-synonymous	glycogen phosphorylase GlgP
Mb1363	1492599	1495190	1726	1494324	T	G	TTC->F	GTC->V	non-synonymous	glycogen phosphorylase GlgP
Mb1363	1492599	1495190	2401	1494999	T	G	TCC->S	GCC->A	non-synonymous	glycogen phosphorylase GlgP
Mb1364c	1497224	1495230	239	1496986	G	T	ACG->T	AAG->K	non-synonymous	ATP-dependent helicase dinG-like protein
Mb1365c	1498594	1497248	1269	1497326	T	C	GGA->G	GGG->G	synonymous	nicotinate phosphoribosyltransferase
Mb1365c	1498594	1497248	1072	1497523	T	C	AAA->K	GAA->E	non-synonymous	nicotinate phosphoribosyltransferase
Mb1367	1498961	1499617	300	1499260	G	T	CGG->R	CGT->R	synonymous	transcriptional regulator
Mb1368	1499634	1500668	102	1499735	G	A	GTG->V	GTA->V	synonymous	hydrolase
Mb1368	1499634	1500668	381	1500014	A	G	ACA->T	ACG->T	synonymous	hydrolase
Mb1373	1503110	1503925	120	1503229	C	T	GGC->G	GGT->G	synonymous	glutamate racemase
Mb1374	1503952	1504773	57	1504008	A	G	CGA->R	CGG->R	synonymous	hypothetical protein
Mb1375	1504790	1505569	289	1505078	A	G	AGC->S	GGC->G	non-synonymous	ribonuclease PH
Mb1378c	1506958	1506578	242	1506717	G	T	GCG->A	GAG->E	non-synonymous	lipoprotein LprD
Mb1386	1516266	1516595	43	1516308	A	G	AGG->R	GGG->G	non-synonymous	hypothetical protein
Mb1390c	1522067	1519920	858	1521210	C	A	GCG->A	GCT->A	synonymous	hypothetical protein
Mb1390c	1522067	1519920	242	1521826	G	A	CCC->P	CTC->L	non-synonymous	hypothetical protein
Mb1391c	1522855	1522064	489	1522367	G	T	GCC->A	GCA->A	synonymous	hypothetical protein
Mb1393	1524647	1528126	92	1524738	T	G	GTC->V	GGC->G	non-synonymous	transcriptional regulator
Mb1393	1524647	1528126	1325	1525971	C	A	GCC->A	GAC->D	non-synonymous	transcriptional regulator
Mb1394	1528208	1528960	559	1528766	A	G	AGG->R	GGG->G	non-synonymous	transcriptional regulator
Mb1396c	1531668	1530478	978	1530691	T	G	GCA->A	GCC->A	synonymous	PPE family protein
Mb1396c	1531668	1530478	975	1530694	T	C	CCA->P	CCG->P	synonymous	PPE family protein
Mb1396c	1531668	1530478	974	1530695	G	T	CCA->P	CAA->Q	non-synonymous	PPE family protein
Mb1396c	1531668	1530478	906	1530763	T	C	TCA->S	TCG->S	synonymous	PPE family protein
Mb1396c	1531668	1530478	779	1530890	T	C	AAC->N	AGC->S	non-synonymous	PPE family protein
Mb1396c	1531668	1530478	775	1530894	T	C	ACC->T	GCC->A	non-synonymous	PPE family protein
Mb1396c	1531668	1530478	712	1530957	T	G	ATC->I	CTC->L	non-synonymous	PPE family protein
Mb1396c	1531668	1530478	691	1530978	C	T	GTC->V	ATC->I	non-synonymous	PPE family protein
Mb1396c	1531668	1530478	690	1530979	C	G	ACG->T	ACC->T	synonymous	PPE family protein
Mb1396c	1531668	1530478	688	1530981	T	C	ACG->T	GCG->A	non-synonymous	PPE family protein
Mb1396c	1531668	1530478	687	1530982	C	T	AAG->K	AAA->K	synonymous	PPE family protein
Mb1396c	1531668	1530478	681	1530988	C	G	CTG->L	CTC->L	synonymous	PPE family protein
Mb1396c	1531668	1530478	678	1530991	G	T	GGC->G	GGA->G	synonymous	PPE family protein
Mb1396c	1531668	1530478	677	1530992	C	T	GGC->G	GAC->D	non-synonymous	PPE family protein
Mb1396c	1531668	1530478	673	1530996	C	T	GGT->G	AGT->S	non-synonymous	PPE family protein
Mb1396c	1531668	1530478	669	1531000	C	T	AAG->K	AAA->K	synonymous	PPE family protein
Mb1396c	1531668	1530478	667	1531002	T	G	AAG->K	CAG->Q	non-synonymous	PPE family protein
Mb1396c	1531668	1530478	665	1531004	G	T	TCC->S	TAC->Y	non-synonymous	PPE family protein
Mb1396c	1531668	1530478	664	1531005	A	C	TCC->S	GCC->A	non-synonymous	PPE family protein
Mb1396c	1531668	1530478	663	1531006	A	G	TCT->S	TCC->S	synonymous	PPE family protein
Mb1396c	1531668	1530478	662	1531007	G	A	TCT->S	TTT->F	non-synonymous	PPE family protein
Mb1396c	1531668	1530478	660	1531009	A	C	CCT->P	CCG->P	synonymous	PPE family protein
Mb1396c	1531668	1530478	656	1531013	G	C	ACG->T	AGG->R	non-synonymous	PPE family protein
Mb1396c	1531668	1530478	655	1531014	T	A	ACG->T	TCG->S	non-synonymous	PPE family protein
Mb1396c	1531668	1530478	653	1531016	G	A	ACC->T	ATC->I	non-synonymous	PPE family protein
Mb1396c	1531668	1530478	649	1531020	C	T	GGC->G	AGC->S	non-synonymous	PPE family protein
Mb1396c	1531668	1530478	648	1531021	C	T	CAG->Q	CAA->Q	synonymous	PPE family protein
Mb1396c	1531668	1530478	646	1531023	G	T	CAG->Q	AAG->K	non-synonymous	PPE family protein
Mb1396c	1531668	1530478	630	1531039	C	T	CAG->Q	CAA->Q	synonymous	PPE family protein
Mb1396c	1531668	1530478	618	1531051	C	T	CAG->Q	CAA->Q	synonymous	PPE family protein
Mb1396c	1531668	1530478	575	1531094	G	A	TCC->S	TTC->F	non-synonymous	PPE family protein
Mb1396c	1531668	1530478	574	1531095	A	T	TCC->S	ACC->T	non-synonymous	PPE family protein
Mb1396c	1531668	1530478	557	1531112	G	A	GCC->A	GTC->V	non-synonymous	PPE family protein
Mb1396c	1531668	1530478	546	1531123	G	A	CTC->L	CTT->L	synonymous	PPE family protein
Mb1396c	1531668	1530478	537	1531132	A	G	GGT->G	GGC->G	synonymous	PPE family protein
Mb1396c	1531668	1530478	534	1531135	C	G	GCG->A	GCC->A	synonymous	PPE family protein
Mb1396c	1531668	1530478	532	1531137	C	G	GCG->A	CCG->P	non-synonymous	PPE family protein
Mb1396c	1531668	1530478	530	1531139	C	T	AGC->S	AAC->N	non-synonymous	PPE family protein
Mb1396c	1531668	1530478	525	1531144	C	G	ATG->M	ATC->I	non-synonymous	PPE family protein
Mb1396c	1531668	1530478	521	1531148	T	A	GAG->E	GTG->V	non-synonymous	PPE family protein
Mb1396c	1531668	1530478	520	1531149	C	G	GAG->E	CAG->Q	non-synonymous	PPE family protein
Mb1396c	1531668	1530478	519	1531150	C	T	CCG->P	CCA->P	synonymous	PPE family protein
Mb1396c	1531668	1530478	516	1531153	C	G	GCG->A	GCC->A	synonymous	PPE family protein
Mb1396c	1531668	1530478	513	1531156	C	G	GAG->E	GAC->D	non-synonymous	PPE family protein
Mb1396c	1531668	1530478	493	1531176	T	C	ACG->T	GCG->A	non-synonymous	PPE family protein
Mb1396c	1531668	1530478	491	1531178	G	T	GCG->A	GAG->E	non-synonymous	PPE family protein
Mb1396c	1531668	1530478	489	1531180	C	G	ACG->T	ACC->T	synonymous	PPE family protein
Mb1396c	1531668	1530478	475	1531194	T	C	ACG->T	GCG->A	non-synonymous	PPE family protein
Mb1396c	1531668	1530478	472	1531197	C	T	GCG->A	ACG->T	non-synonymous	PPE family protein
Mb1396c	1531668	1530478	471	1531198	C	G	GCG->A	GCC->A	synonymous	PPE family protein
Mb1396c	1531668	1530478	426	1531243	G	C	GGC->G	GGG->G	synonymous	PPE family protein
Mb1396c	1531668	1530478	393	1531276	G	C	ACC->T	ACG->T	synonymous	PPE family protein
Mb1396c	1531668	1530478	168	1531501	C	T	GGG->G	GGA->G	synonymous	PPE family protein
Mb1396c	1531668	1530478	164	1531505	A	G	GTG->V	GCG->A	non-synonymous	PPE family protein
Mb1396c	1531668	1530478	163	1531506	C	T	GTG->V	ATG->M	non-synonymous	PPE family protein
Mb1396c	1531668	1530478	88	1531581	G	T	CAG->Q	AAG->K	non-synonymous	PPE family protein
Mb1396c	1531668	1530478	87	1531582	A	C	GCT->A	GCG->A	synonymous	PPE family protein
Mb1396c	1531668	1530478	84	1531585	C	G	GCG->A	GCC->A	synonymous	PPE family protein
Mb1396c	1531668	1530478	51	1531618	G	A	TAC->Y	TAT->Y	synonymous	PPE family protein
Mb1397c	1532645	1531983	308	1532338	C	A	GGC->G	GTC->V	non-synonymous	hypothetical protein
Mb1398c	1533427	1532642	464	1532964	T	G	AAC->N	ACC->T	non-synonymous	hypothetical protein
Mb1399c	1535679	1533718	706	1534974	T	C	ACG->T	GCG->A	non-synonymous	hypothetical protein
Mb1400c	1536204	1535818	244	1535961	T	C	AAG->K	GAG->E	non-synonymous	hypothetical protein
Mb1403	1539055	1539840	779	1539833	C	T	GCG->A	GTG->V	non-synonymous	lipoprotein LprF
Mb1410	1544511	1545830	256	1544766	A	G	AGG->R	GGG->G	non-synonymous	hypothetical protein
Mb1410	1544511	1545830	318	1544828	A	G	CCA->P	CCG->P	synonymous	hypothetical protein
Mb1410	1544511	1545830	965	1545475	C	G	CCG->P	CGG->R	non-synonymous	hypothetical protein
Mb1411	1545827	1547320	707	1546533	C	G	CCA->P	CGA->R	non-synonymous	hypothetical protein
Mb1413c	1549334	1547907	26	1549309	T	C	CAC->H	CGC->R	non-synonymous	hypothetical protein
Mb1416	1550867	1552159	565	1551431	T	G	TTC->F	GTC->V	non-synonymous	dihydroorotase
Mb1418	1552650	1553780	353	1553002	G	C	GGC->G	GCC->A	non-synonymous	carbamoyl phosphate synthase small subunit
Mb1418	1552650	1553780	817	1553466	T	C	TCG->S	CCG->P	non-synonymous	carbamoyl phosphate synthase small subunit
Mb1419	1553780	1557127	2462	1556241	A	C	GAG->E	GCG->A	non-synonymous	carbamoyl phosphate synthase large subunit
Mb1419	1553780	1557127	2496	1556275	T	C	CAT->H	CAC->H	synonymous	carbamoyl phosphate synthase large subunit
Mb1422	1558448	1560067	135	1558582	C	A	TCC->S	TCA->S	synonymous	PPE family protein
Mb1422	1558448	1560067	171	1558618	G	C	GAG->E	GAC->D	non-synonymous	PPE family protein
Mb1422	1558448	1560067	281	1558728	C	T	GCC->A	GTC->V	non-synonymous	PPE family protein
Mb1427	1563504	1564715	178	1563681	G	A	GCC->A	ACC->T	non-synonymous	S-adenosylmethionine synthetase
Mb1431c	1570164	1568806	899	1569266	T	C	CAC->H	CGC->R	non-synonymous	PE-PGRS family protein
Mb1431c	1570164	1568806	781	1569384	C	A	GGC->G	TGC->C	non-synonymous	PE-PGRS family protein
Mb1432c	1570820	1570419	308	1570513	C	T	GGC->G	GAC->D	non-synonymous	hypothetical protein
Mb1435c	1573103	1572141	316	1572788	T	G	ACC->T	CCC->P	non-synonymous	lipase LipH
Mb1435c	1573103	1572141	270	1572834	G	T	TTC->F	TTA->L	non-synonymous	lipase LipH
Mb1436	1573237	1573839	312	1573548	G	A	CCG->P	CCA->P	synonymous	hypothetical protein
Mb1442	1579408	1580781	1279	1580686	C	A	CTC->L	ATC->I	non-synonymous	Fmu protein (SUN protein)
Mb1444	1581501	1582520	90	1581590	C	A	AAC->N	AAA->K	non-synonymous	bifunctional diaminohydroxyphosphoribosylaminopyrimidine deaminase/5-amino-6-(5-phosphoribosylamino) uracil reductase
Mb1444	1581501	1582520	211	1581711	A	G	ACC->T	GCC->A	non-synonymous	bifunctional diaminohydroxyphosphoribosylaminopyrimidine deaminase/5-amino-6-(5-phosphoribosylamino) uracil reductase
Mb1448	1585693	1586208	33	1585725	C	T	GTC->V	GTT->V	synonymous	hypothetical protein
Mb1455	1590349	1592289	865	1591213	G	A	GTC->V	ATC->I	non-synonymous	excinuclease ABC subunit C
Mb1455	1590349	1592289	1301	1591649	T	C	GTG->V	GCG->A	non-synonymous	excinuclease ABC subunit C
Mb1456	1592286	1593191	756	1593041	T	C	CGT->R	CGC->R	synonymous	hypothetical protein
Mb1457	1593188	1594216	257	1593444	T	C	GTG->V	GCG->A	non-synonymous	hypothetical protein
Mb1460	1595965	1597344	1028	1596992	T	C	CTC->L	CCC->P	non-synonymous	hypothetical protein
Mb1465	1602693	1604279	288	1602980	G	T	GCG->A	GCT->A	synonymous	PE family protein
Mb1466	1604390	1606159	1363	1605752	C	A	CAG->Q	AAG->K	non-synonymous	hypothetical protein
Mb1470c	1609278	1608649	199	1609080	T	C	ACG->T	GCG->A	non-synonymous	proline, glycine, valine-rich secreted protein
Mb1473	1611892	1612677	498	1612389	C	T	AGC->S	AGT->S	synonymous	triosephosphate isomerase
Mb1474c	1613714	1613289	85	1613630	G	T	CTT->L	ATT->I	non-synonymous	hypothetical protein
Mb1476c	1616012	1614537	1269	1614744	A	G	GGT->G	GGC->G	synonymous	PE-PGRS family protein
Mb1476c	1616012	1614537	1061	1614952	T	G	AAC->N	ACC->T	non-synonymous	PE-PGRS family protein
Mb1477	1616119	1618419	391	1616509	C	G	CTC->L	GTC->V	non-synonymous	biotin sulfoxide reductase
Mb1482c	1623309	1621765	787	1622523	C	T	GAT->D	AAT->N	non-synonymous	glucose-6-phosphate 1-dehydrogenase
Mb1485c	1631211	1626985	3366	1627846	G	A	GGC->G	GGT->G	synonymous	PE-PGRS family protein
Mb1485c	1631211	1626985	2752	1628460	G	T	CAC->H	AAC->N	non-synonymous	PE-PGRS family protein
Mb1485c	1631211	1626985	2148	1629064	G	A	GGC->G	GGT->G	synonymous	PE-PGRS family protein
Mb1485c	1631211	1626985	2145	1629067	G	A	AAC->N	AAT->N	synonymous	PE-PGRS family protein
Mb1485c	1631211	1626985	2143	1629069	T	G	AAC->N	CAC->H	non-synonymous	PE-PGRS family protein
Mb1485c	1631211	1626985	2142	1629070	G	A	GGC->G	GGT->G	synonymous	PE-PGRS family protein
Mb1485c	1631211	1626985	2021	1629191	G	C	ACC->T	AGC->S	non-synonymous	PE-PGRS family protein
Mb1485c	1631211	1626985	1521	1629691	G	A	AAC->N	AAT->N	synonymous	PE-PGRS family protein
Mb1485c	1631211	1626985	1294	1629918	C	A	GTC->V	TTC->F	non-synonymous	PE-PGRS family protein
Mb1485c	1631211	1626985	1280	1629932	T	G	AAC->N	ACC->T	non-synonymous	PE-PGRS family protein
Mb1485c	1631211	1626985	1279	1629933	T	G	AAC->N	CAC->H	non-synonymous	PE-PGRS family protein
Mb1485c	1631211	1626985	1277	1629935	G	C	GCC->A	GGC->G	non-synonymous	PE-PGRS family protein
Mb1485c	1631211	1626985	1269	1629943	T	C	GGA->G	GGG->G	synonymous	PE-PGRS family protein
Mb1485c	1631211	1626985	1264	1629948	G	C	CGC->R	GGC->G	non-synonymous	PE-PGRS family protein
Mb1485c	1631211	1626985	1254	1629958	G	A	GTC->V	GTT->V	synonymous	PE-PGRS family protein
Mb1485c	1631211	1626985	1251	1629961	G	A	GGC->G	GGT->G	synonymous	PE-PGRS family protein
Mb1485c	1631211	1626985	1248	1629964	A	G	GGT->G	GGC->G	synonymous	PE-PGRS family protein
Mb1485c	1631211	1626985	1245	1629967	A	G	GCT->A	GCC->A	synonymous	PE-PGRS family protein
Mb1485c	1631211	1626985	1242	1629970	G	C	GGC->G	GGG->G	synonymous	PE-PGRS family protein
Mb1485c	1631211	1626985	1235	1629977	T	G	GAC->D	GCC->A	non-synonymous	PE-PGRS family protein
Mb1485c	1631211	1626985	1234	1629978	C	T	GAC->D	AAC->N	non-synonymous	PE-PGRS family protein
Mb1485c	1631211	1626985	1226	1629986	T	G	GAC->D	GCC->A	non-synonymous	PE-PGRS family protein
Mb1485c	1631211	1626985	1224	1629988	A	C	GGT->G	GGG->G	synonymous	PE-PGRS family protein
Mb1485c	1631211	1626985	1068	1630144	G	A	GGC->G	GGT->G	synonymous	PE-PGRS family protein
Mb1485c	1631211	1626985	1032	1630180	G	A	GGC->G	GGT->G	synonymous	PE-PGRS family protein
Mb1485c	1631211	1626985	971	1630241	G	A	GCC->A	GTC->V	non-synonymous	PE-PGRS family protein
Mb1485c	1631211	1626985	966	1630246	G	A	GGC->G	GGT->G	synonymous	PE-PGRS family protein
Mb1485c	1631211	1626985	962	1630250	T	G	AAC->N	ACC->T	non-synonymous	PE-PGRS family protein
Mb1485c	1631211	1626985	961	1630251	T	A	AAC->N	TAC->Y	non-synonymous	PE-PGRS family protein
Mb1485c	1631211	1626985	960	1630252	G	C	AGC->S	AGG->R	non-synonymous	PE-PGRS family protein
Mb1485c	1631211	1626985	959	1630253	C	G	AGC->S	ACC->T	non-synonymous	PE-PGRS family protein
Mb1485c	1631211	1626985	952	1630260	C	G	GAC->D	CAC->H	non-synonymous	PE-PGRS family protein
Mb1485c	1631211	1626985	951	1630261	T	C	CCA->P	CCG->P	synonymous	PE-PGRS family protein
Mb1485c	1631211	1626985	947	1630265	A	G	TTC->F	TCC->S	non-synonymous	PE-PGRS family protein
Mb1485c	1631211	1626985	945	1630267	G	C	ATC->I	ATG->M	non-synonymous	PE-PGRS family protein
Mb1485c	1631211	1626985	940	1630272	C	A	GGT->G	TGT->C	non-synonymous	PE-PGRS family protein
Mb1485c	1631211	1626985	938	1630274	C	T	GGC->G	GAC->D	non-synonymous	PE-PGRS family protein
Mb1485c	1631211	1626985	934	1630278	T	C	AAG->K	GAG->E	non-synonymous	PE-PGRS family protein
Mb1485c	1631211	1626985	927	1630285	G	T	GCC->A	GCA->A	synonymous	PE-PGRS family protein
Mb1485c	1631211	1626985	918	1630294	G	C	ATC->I	ATG->M	non-synonymous	PE-PGRS family protein
Mb1485c	1631211	1626985	916	1630296	T	C	ATC->I	GTC->V	non-synonymous	PE-PGRS family protein
Mb1485c	1631211	1626985	911	1630301	G	T	GCG->A	GAG->E	non-synonymous	PE-PGRS family protein
Mb1485c	1631211	1626985	909	1630303	A	C	GCT->A	GCG->A	synonymous	PE-PGRS family protein
Mb1485c	1631211	1626985	48	1631164	T	C	TTA->L	TTG->L	synonymous	PE-PGRS family protein
Mb1485c	1631211	1626985	47	1631165	A	G	TTA->L	TCA->S	non-synonymous	PE-PGRS family protein
Mb1485c	1631211	1626985	42	1631170	T	C	GCA->A	GCG->A	synonymous	PE-PGRS family protein
Mb1485c	1631211	1626985	39	1631173	G	C	GCC->A	GCG->A	synonymous	PE-PGRS family protein
Mb1485c	1631211	1626985	36	1631176	C	G	GCG->A	GCC->A	synonymous	PE-PGRS family protein
Mb1485c	1631211	1626985	19	1631193	C	T	GCC->A	ACC->T	non-synonymous	PE-PGRS family protein
Mb1485c	1631211	1626985	18	1631194	C	T	GTG->V	GTA->V	synonymous	PE-PGRS family protein
Mb1486	1631613	1632539	202	1631814	A	G	ACC->T	GCC->A	non-synonymous	protoheme IX farnesyltransferase
Mb1487c	1634975	1632588	1474	1633502	C	G	GCC->A	CCC->P	non-synonymous	PE-PGRS family protein
Mb1487c	1634975	1632588	1473	1633503	C	T	GGG->G	GGA->G	synonymous	PE-PGRS family protein
Mb1487c	1634975	1632588	1466	1633510	G	T	GCC->A	GAC->D	non-synonymous	PE-PGRS family protein
Mb1487c	1634975	1632588	1465	1633511	C	T	GCC->A	ACC->T	non-synonymous	PE-PGRS family protein
Mb1487c	1634975	1632588	1464	1633512	C	G	GGG->G	GGC->G	synonymous	PE-PGRS family protein
Mb1487c	1634975	1632588	1463	1633513	C	G	GGG->G	GCG->A	non-synonymous	PE-PGRS family protein
Mb1487c	1634975	1632588	1455	1633521	A	G	GGT->G	GGC->G	synonymous	PE-PGRS family protein
Mb1487c	1634975	1632588	1454	1633522	C	G	GGT->G	GCT->A	non-synonymous	PE-PGRS family protein
Mb1487c	1634975	1632588	1453	1633523	C	T	GGT->G	AGT->S	non-synonymous	PE-PGRS family protein
Mb1487c	1634975	1632588	1449	1633527	G	C	GCC->A	GCG->A	synonymous	PE-PGRS family protein
Mb1487c	1634975	1632588	1446	1633530	T	G	AAA->K	AAC->N	non-synonymous	PE-PGRS family protein
Mb1487c	1634975	1632588	1445	1633531	T	G	AAA->K	ACA->T	non-synonymous	PE-PGRS family protein
Mb1487c	1634975	1632588	1432	1633544	A	T	TCA->S	ACA->T	non-synonymous	PE-PGRS family protein
Mb1487c	1634975	1632588	1430	1633546	A	G	TTC->F	TCC->S	non-synonymous	PE-PGRS family protein
Mb1487c	1634975	1632588	1429	1633547	A	C	TTC->F	GTC->V	non-synonymous	PE-PGRS family protein
Mb1487c	1634975	1632588	1426	1633550	G	T	CAC->H	AAC->N	non-synonymous	PE-PGRS family protein
Mb1487c	1634975	1632588	1407	1633569	C	A	GGG->G	GGT->G	synonymous	PE-PGRS family protein
Mb1487c	1634975	1632588	1382	1633594	C	G	AGC->S	ACC->T	non-synonymous	PE-PGRS family protein
Mb1487c	1634975	1632588	1377	1633599	C	G	GGG->G	GGC->G	synonymous	PE-PGRS family protein
Mb1487c	1634975	1632588	1373	1633603	G	A	GCC->A	GTC->V	non-synonymous	PE-PGRS family protein
Mb1487c	1634975	1632588	1372	1633604	C	T	GCC->A	ACC->T	non-synonymous	PE-PGRS family protein
Mb1487c	1634975	1632588	1371	1633605	C	G	GCG->A	GCC->A	synonymous	PE-PGRS family protein
Mb1487c	1634975	1632588	1365	1633611	G	C	CAC->H	CAG->Q	non-synonymous	PE-PGRS family protein
Mb1487c	1634975	1632588	1362	1633614	G	A	GCC->A	GCT->A	synonymous	PE-PGRS family protein
Mb1487c	1634975	1632588	1359	1633617	A	G	GGT->G	GGC->G	synonymous	PE-PGRS family protein
Mb1487c	1634975	1632588	1355	1633621	A	G	ATC->I	ACC->T	non-synonymous	PE-PGRS family protein
Mb1487c	1634975	1632588	1353	1633623	C	G	ACG->T	ACC->T	synonymous	PE-PGRS family protein
Mb1487c	1634975	1632588	1352	1633624	G	A	ACG->T	ATG->M	non-synonymous	PE-PGRS family protein
Mb1487c	1634975	1632588	1324	1633652	C	G	GCC->A	CCC->P	non-synonymous	PE-PGRS family protein
Mb1487c	1634975	1632588	1315	1633661	C	T	GCC->A	ACC->T	non-synonymous	PE-PGRS family protein
Mb1487c	1634975	1632588	1306	1633670	C	T	GAC->D	AAC->N	non-synonymous	PE-PGRS family protein
Mb1487c	1634975	1632588	1305	1633671	A	G	GGT->G	GGC->G	synonymous	PE-PGRS family protein
Mb1487c	1634975	1632588	1299	1633677	A	G	CAT->H	CAC->H	synonymous	PE-PGRS family protein
Mb1487c	1634975	1632588	1297	1633679	G	T	CAT->H	AAT->N	non-synonymous	PE-PGRS family protein
Mb1487c	1634975	1632588	1289	1633687	G	T	GCC->A	GAC->D	non-synonymous	PE-PGRS family protein
Mb1487c	1634975	1632588	1288	1633688	C	G	GCC->A	CCC->P	non-synonymous	PE-PGRS family protein
Mb1487c	1634975	1632588	1287	1633689	C	A	GGG->G	GGT->G	synonymous	PE-PGRS family protein
Mb1487c	1634975	1632588	1267	1633709	C	A	GTC->V	TTC->F	non-synonymous	PE-PGRS family protein
Mb1487c	1634975	1632588	1208	1633768	T	G	GAC->D	GCC->A	non-synonymous	PE-PGRS family protein
Mb1487c	1634975	1632588	1207	1633769	C	T	GAC->D	AAC->N	non-synonymous	PE-PGRS family protein
Mb1487c	1634975	1632588	1199	1633777	T	G	GAC->D	GCC->A	non-synonymous	PE-PGRS family protein
Mb1487c	1634975	1632588	1197	1633779	A	C	GGT->G	GGG->G	synonymous	PE-PGRS family protein
Mb1487c	1634975	1632588	1136	1633840	G	A	GCT->A	GTT->V	non-synonymous	PE-PGRS family protein
Mb1487c	1634975	1632588	1128	1633848	A	G	GCT->A	GCC->A	synonymous	PE-PGRS family protein
Mb1487c	1634975	1632588	1127	1633849	G	A	GCT->A	GTT->V	non-synonymous	PE-PGRS family protein
Mb1487c	1634975	1632588	1122	1633854	G	A	GGC->G	GGT->G	synonymous	PE-PGRS family protein
Mb1487c	1634975	1632588	1119	1633857	C	G	ATG->M	ATC->I	non-synonymous	PE-PGRS family protein
Mb1487c	1634975	1632588	1118	1633858	A	G	ATG->M	ACG->T	non-synonymous	PE-PGRS family protein
Mb1487c	1634975	1632588	1117	1633859	T	C	ATG->M	GTG->V	non-synonymous	PE-PGRS family protein
Mb1487c	1634975	1632588	1116	1633860	C	A	GGG->G	GGT->G	synonymous	PE-PGRS family protein
Mb1487c	1634975	1632588	1109	1633867	T	C	AAC->N	AGC->S	non-synonymous	PE-PGRS family protein
Mb1487c	1634975	1632588	1101	1633875	A	G	GAT->D	GAC->D	synonymous	PE-PGRS family protein
Mb1487c	1634975	1632588	1100	1633876	T	G	GAT->D	GCT->A	non-synonymous	PE-PGRS family protein
Mb1487c	1634975	1632588	1091	1633885	T	G	AAC->N	ACC->T	non-synonymous	PE-PGRS family protein
Mb1487c	1634975	1632588	1090	1633886	T	C	AAC->N	GAC->D	non-synonymous	PE-PGRS family protein
Mb1487c	1634975	1632588	1089	1633887	A	C	GAT->D	GAG->E	non-synonymous	PE-PGRS family protein
Mb1487c	1634975	1632588	1087	1633889	C	G	GAT->D	CAT->H	non-synonymous	PE-PGRS family protein
Mb1487c	1634975	1632588	1086	1633890	C	T	GGG->G	GGA->G	synonymous	PE-PGRS family protein
Mb1487c	1634975	1632588	1083	1633893	A	G	GCT->A	GCC->A	synonymous	PE-PGRS family protein
Mb1487c	1634975	1632588	1081	1633895	C	T	GCT->A	ACT->T	non-synonymous	PE-PGRS family protein
Mb1487c	1634975	1632588	1079	1633897	A	G	GTC->V	GCC->A	non-synonymous	PE-PGRS family protein
Mb1487c	1634975	1632588	1066	1633910	G	C	CGT->R	GGT->G	non-synonymous	PE-PGRS family protein
Mb1487c	1634975	1632588	1062	1633914	A	G	TTT->F	TTC->F	synonymous	PE-PGRS family protein
Mb1487c	1634975	1632588	1055	1633921	G	C	GCC->A	GGC->G	non-synonymous	PE-PGRS family protein
Mb1487c	1634975	1632588	1041	1633935	G	A	GGC->G	GGT->G	synonymous	PE-PGRS family protein
Mb1487c	1634975	1632588	1036	1633940	T	C	ACC->T	GCC->A	non-synonymous	PE-PGRS family protein
Mb1487c	1634975	1632588	944	1634032	G	A	GCC->A	GTC->V	non-synonymous	PE-PGRS family protein
Mb1487c	1634975	1632588	939	1634037	G	A	GGC->G	GGT->G	synonymous	PE-PGRS family protein
Mb1487c	1634975	1632588	935	1634041	T	G	AAC->N	ACC->T	non-synonymous	PE-PGRS family protein
Mb1487c	1634975	1632588	934	1634042	T	A	AAC->N	TAC->Y	non-synonymous	PE-PGRS family protein
Mb1487c	1634975	1632588	933	1634043	G	C	AGC->S	AGG->R	non-synonymous	PE-PGRS family protein
Mb1487c	1634975	1632588	932	1634044	C	G	AGC->S	ACC->T	non-synonymous	PE-PGRS family protein
Mb1487c	1634975	1632588	925	1634051	C	G	GAC->D	CAC->H	non-synonymous	PE-PGRS family protein
Mb1487c	1634975	1632588	924	1634052	T	C	CCA->P	CCG->P	synonymous	PE-PGRS family protein
Mb1487c	1634975	1632588	920	1634056	A	G	TTC->F	TCC->S	non-synonymous	PE-PGRS family protein
Mb1487c	1634975	1632588	918	1634058	G	C	ATC->I	ATG->M	non-synonymous	PE-PGRS family protein
Mb1487c	1634975	1632588	913	1634063	C	A	GGT->G	TGT->C	non-synonymous	PE-PGRS family protein
Mb1487c	1634975	1632588	911	1634065	C	T	GGC->G	GAC->D	non-synonymous	PE-PGRS family protein
Mb1487c	1634975	1632588	907	1634069	T	C	AAG->K	GAG->E	non-synonymous	PE-PGRS family protein
Mb1487c	1634975	1632588	900	1634076	G	T	GCC->A	GCA->A	synonymous	PE-PGRS family protein
Mb1487c	1634975	1632588	891	1634085	G	C	ATC->I	ATG->M	non-synonymous	PE-PGRS family protein
Mb1487c	1634975	1632588	889	1634087	T	C	ATC->I	GTC->V	non-synonymous	PE-PGRS family protein
Mb1487c	1634975	1632588	884	1634092	G	T	GCG->A	GAG->E	non-synonymous	PE-PGRS family protein
Mb1487c	1634975	1632588	882	1634094	A	C	GCT->A	GCG->A	synonymous	PE-PGRS family protein
Mb1487c	1634975	1632588	48	1634928	T	C	TTA->L	TTG->L	synonymous	PE-PGRS family protein
Mb1487c	1634975	1632588	47	1634929	A	G	TTA->L	TCA->S	non-synonymous	PE-PGRS family protein
Mb1487c	1634975	1632588	42	1634934	T	C	GCA->A	GCG->A	synonymous	PE-PGRS family protein
Mb1487c	1634975	1632588	39	1634937	G	C	GCC->A	GCG->A	synonymous	PE-PGRS family protein
Mb1487c	1634975	1632588	36	1634940	C	G	GCG->A	GCC->A	synonymous	PE-PGRS family protein
Mb1487c	1634975	1632588	19	1634957	C	T	GCC->A	ACC->T	non-synonymous	PE-PGRS family protein
Mb1487c	1634975	1632588	18	1634958	C	T	GTG->V	GTA->V	synonymous	PE-PGRS family protein
Mb1488	1635127	1636392	1038	1636164	G	A	CTG->L	CTA->L	synonymous	transcriptional activator protein
Mb1488	1635127	1636392	1263	1636389	C	T	CGC->R	CGT->R	synonymous	transcriptional activator protein
Mb1489c	1637406	1636420	219	1637188	T	C	GGA->G	GGG->G	synonymous	quinone reductase
Mb1493c	1641006	1640065	397	1640610	T	C	ACC->T	GCC->A	non-synonymous	unidentified antibiotic-transport ATP-binding protein ABC transporter
Mb1495	1642932	1643738	797	1643728	T	C	GTG->V	GCG->A	non-synonymous	transcriptional regulator
Mb1496	1643735	1646275	129	1643863	C	T	GGC->G	GGT->G	synonymous	hypothetical protein
Mb1496	1643735	1646275	448	1644182	G	A	GTA->V	ATA->I	non-synonymous	hypothetical protein
Mb1498	1647462	1648262	593	1648054	A	G	GAA->E	GGA->G	non-synonymous	ABC transporter ATP-binding protein
Mb1507	1656509	1657366	232	1656740	T	C	TCG->S	CCG->P	non-synonymous	enoyl-CoA hydratase
Mb1508	1657402	1659030	1215	1658616	A	G	CAA->Q	CAG->Q	synonymous	macrolide ABC transporter ATP-binding protein
Mb1509	1659127	1659318	178	1659304	C	T	CCC->P	TCC->S	non-synonymous	transcriptional regulator
Mb1510c	1659950	1659387	486	1659465	C	G	GCG->A	GCC->A	synonymous	transcriptional regulator
Mb1517	1668123	1669130	282	1668404	T	C	CGT->R	CGC->R	synonymous	hypothetical protein
Mb1525	1675298	1675654	155	1675452	A	C	AAG->K	ACG->T	non-synonymous	hypothetical protein
Mb1527	1676068	1677375	306	1676373	C	T	ACC->T	ACT->T	synonymous	hypothetical protein
Mb1528c	1678712	1677954	39	1678674	T	C	GTA->V	GTG->V	synonymous	hypothetical protein
Mb1530	1680751	1683003	975	1681725	C	T	AGC->S	AGT->S	synonymous	methylmalonyl-CoA mutase
Mb1534	1684687	1685976	124	1684810	A	G	ATG->M	GTG->V	non-synonymous	esterase
Mb1538	1687596	1688624	944	1688539	T	G	CTG->L	CGG->R	non-synonymous	glycosyltransferase
Mb1541	1689999	1690568	480	1690478	T	C	TGT->C	TGC->C	synonymous	hypothetical protein
Mb1542c	1691889	1690741	946	1690944	T	C	AAA->K	GAA->E	non-synonymous	TDP-4-oxo-6-deoxy-D-glucose transaminase
Mb1542c	1691889	1690741	598	1691292	C	A	GAA->E	TAA->*	non-synonymous	TDP-4-oxo-6-deoxy-D-glucose transaminase
Mb1542c	1691889	1690741	108	1691782	G	A	TTC->F	TTT->F	synonymous	TDP-4-oxo-6-deoxy-D-glucose transaminase
Mb1543c	1692691	1692026	273	1692419	A	G	TAT->Y	TAC->Y	synonymous	hypothetical protein
Mb1543c	1692691	1692026	151	1692541	C	T	GCC->A	ACC->T	non-synonymous	hypothetical protein
Mb1545	1693657	1694616	798	1694454	A	C	AGA->R	AGC->S	non-synonymous	hypothetical protein
Mb1545	1693657	1694616	949	1694605	C	A	CTG->L	ATG->M	non-synonymous	hypothetical protein
Mb1547	1695041	1696081	643	1695683	C	T	CGC->R	TGC->C	non-synonymous	sugar transferase
Mb1548	1696315	1698066	221	1696535	T	G	ATC->I	AGC->S	non-synonymous	acyl-CoA synthetase
Mb1549c	1701625	1698302	3323	1698303	T	G	TAG->*	TCG->S	non-synonymous	transmembrane transport protein MmpL12
Mb1549c	1701625	1698302	2840	1698786	T	C	AAC->N	AGC->S	non-synonymous	transmembrane transport protein MmpL12
Mb1549c	1701625	1698302	610	1701016	C	T	GCC->A	ACC->T	non-synonymous	transmembrane transport protein MmpL12
Mb1551	1702739	1703983	666	1703404	T	C	TTT->F	TTC->F	synonymous	glycosyltransferase
Mb1554c	1712422	1706096	6210	1706213	C	G	GTG->V	GTC->V	synonymous	polyketide synthase
Mb1554c	1712422	1706096	6182	1706241	A	C	CTG->L	CGG->R	non-synonymous	polyketide synthase
Mb1554c	1712422	1706096	4315	1708108	G	A	CTC->L	TTC->F	non-synonymous	polyketide synthase
Mb1554c	1712422	1706096	1594	1710829	T	G	ACC->T	CCC->P	non-synonymous	polyketide synthase
Mb1557	1715386	1716489	426	1715811	A	G	GCA->A	GCG->A	synonymous	alcohol dehydrogenase
Mb1559c	1717563	1717129	417	1717147	C	T	CAG->Q	CAA->Q	synonymous	hypothetical protein
Mb1559c	1717563	1717129	226	1717338	C	G	GCT->A	CCT->P	non-synonymous	hypothetical protein
Mb1563	1720532	1723657	2776	1723307	G	C	GCC->A	CCC->P	non-synonymous	isoleucyl-tRNA synthetase
Mb1565c	1726205	1725225	841	1725365	C	T	GGC->G	AGC->S	non-synonymous	L-aparaginase ansA
Mb1574	1731707	1735261	3228	1734934	A	C	GCA->A	GCC->A	synonymous	DNA polymerase III subunit alpha
Mb1575c	1737346	1735310	203	1737144	G	A	GCG->A	GTG->V	non-synonymous	PPE family protein
Mb1576	1737503	1739446	708	1738210	A	G	GGA->G	GGG->G	synonymous	fatty-acid--CoA ligase
Mb1576	1737503	1739446	1085	1738587	C	T	TCG->S	TTG->L	non-synonymous	fatty-acid--CoA ligase
Mb1579	1743450	1744574	366	1743815	G	A	CGG->R	CGA->R	synonymous	fumarate reductase iron-sulfur subunit FrdB/membrane anchor subunit FrdC
Mb1580	1744571	1744948	372	1744942	C	T	ACC->T	ACT->T	synonymous	fumarate reductase subunit D
Mb1588c	1753314	1751572	523	1752792	T	C	ACC->T	GCC->A	non-synonymous	malto-oligosyltrehalose trehalohydrolase
Mb1591c	1756967	1754802	657	1756311	C	T	GAG->E	GAA->E	synonymous	malto-oligosyltrehalose synthase
Mb1613c	1774529	1773528	500	1774030	C	G	GGC->G	GCC->A	non-synonymous	hypothetical protein
Mb1613c	1774529	1773528	166	1774364	C	T	GAA->E	AAA->K	non-synonymous	hypothetical protein
Mb1619c	1780073	1779363	474	1779600	A	G	GCT->A	GCC->A	synonymous	hypothetical protein
Mb1622	1782754	1783611	190	1782943	G	A	GAC->D	AAC->N	non-synonymous	nicotinate-nucleotide pyrophosphorylase
Mb1625	1784949	1786265	939	1785887	G	A	CAG->Q	CAA->Q	synonymous	histidinol dehydrogenase
Mb1630	1789405	1790217	210	1789614	A	G	GAA->E	GAG->E	synonymous	inositol-monophosphatase
Mb1630	1789405	1790217	277	1789681	C	T	CAC->H	TAC->Y	non-synonymous	inositol-monophosphatase
Mb1630	1789405	1790217	752	1790156	T	C	CTG->L	CCG->P	non-synonymous	inositol-monophosphatase
Mb1631	1790219	1791022	362	1790580	T	C	CTG->L	CCG->P	non-synonymous	imidazole glycerol phosphate synthase subunit HisF
Mb1638	1796493	1797725	249	1796741	G	T	GGG->G	GGT->G	synonymous	tryptophan synthase subunit beta
Mb1640	1798537	1799943	90	1798626	C	T	GTC->V	GTT->V	synonymous	prolipoprotein diacylglyceryl transferase
Mb1643	1801555	1802973	660	1802214	T	G	GAT->D	GAG->E	non-synonymous	pyruvate kinase
Mb1643	1801555	1802973	982	1802536	C	T	CGC->R	TGC->C	non-synonymous	pyruvate kinase
Mb1644	1802981	1803883	566	1803546	T	C	CTA->L	CCA->P	non-synonymous	acyl-CoA thioesterase
Mb1648c	1809766	1808726	1017	1808750	C	G	ACG->T	ACC->T	synonymous	integral membrane cytochrome D ubiquinol oxidase CydB
Mb1650c	1811951	1811364	532	1811420	C	T	GCA->A	ACA->T	non-synonymous	hypothetical protein
Mb1651c	1813236	1811980	66	1813171	T	C	GTA->V	GTG->V	synonymous	adenylate cyclase
Mb1652	1813546	1814163	210	1813755	T	C	CGT->R	CGC->R	synonymous	two-component system transcriptional regulator
Mb1654c	1815927	1815436	267	1815661	A	G	TTT->F	TTC->F	synonymous	hypothetical protein
Mb1655	1816031	1818745	556	1816586	A	C	ACC->T	CCC->P	non-synonymous	DNA polymerase I
Mb1655	1816031	1818745	562	1816592	A	G	AGG->R	GGG->G	non-synonymous	DNA polymerase I
Mb1655	1816031	1818745	624	1816654	C	T	CCC->P	CCT->P	synonymous	DNA polymerase I
Mb1656	1818908	1820353	636	1819543	A	C	CGA->R	CGC->R	synonymous	30S ribosomal protein S1
Mb1656	1818908	1820353	1318	1820225	A	G	ACG->T	GCG->A	non-synonymous	30S ribosomal protein S1
Mb1660	1824534	1825949	93	1824626	G	T	CTG->L	CTT->L	synonymous	drug efflux membrane protein
Mb1663c	1829058	1828264	138	1828921	A	G	AAT->N	AAC->N	synonymous	hypothetical protein
Mb1664	1829107	1832025	599	1829705	A	G	GAC->D	GGC->G	non-synonymous	excinuclease ABC subunit A
Mb1667c	1837401	1833883	2985	1834417	C	T	CCG->P	CCA->P	synonymous	lysyl-tRNA synthetase
Mb1667c	1837401	1833883	2831	1834571	C	T	GGC->G	GAC->D	non-synonymous	lysyl-tRNA synthetase
Mb1667c	1837401	1833883	2102	1835300	A	G	ATT->I	ACT->T	non-synonymous	lysyl-tRNA synthetase
Mb1677	1845123	1847618	635	1845757	T	C	GTC->V	GCC->A	non-synonymous	phenylalanyl-tRNA synthetase subunit beta
Mb1679c	1850768	1847712	536	1850233	A	G	GTT->V	GCT->A	non-synonymous	PE-PGRS family protein
Mb1687	1858025	1859437	321	1858345	G	A	CGG->R	CGA->R	synonymous	argininosuccinate lyase
Mb1689	1860690	1867070	2008	1862697	T	C	TGG->W	CGG->R	non-synonymous	polyketide synthase
Mb1689	1860690	1867070	2441	1863130	A	C	GAA->E	GCA->A	non-synonymous	polyketide synthase
Mb1689	1860690	1867070	2931	1863620	A	G	ACA->T	ACG->T	synonymous	polyketide synthase
Mb1689	1860690	1867070	3526	1864215	C	T	CCG->P	TCG->S	non-synonymous	polyketide synthase
Mb1690	1867090	1871898	232	1867321	T	G	TAC->Y	GAC->D	non-synonymous	polyketide synthase
Mb1690	1867090	1871898	477	1867566	T	C	GCT->A	GCC->A	synonymous	polyketide synthase
Mb1690	1867090	1871898	2423	1869512	T	C	GTC->V	GCC->A	non-synonymous	polyketide synthase
Mb1690	1867090	1871898	2808	1869897	A	G	GTA->V	GTG->V	synonymous	polyketide synthase
Mb1690	1867090	1871898	3682	1870771	T	G	TTG->L	GTG->V	non-synonymous	polyketide synthase
Mb1690	1867090	1871898	3778	1870867	G	C	GGA->G	CGA->R	non-synonymous	polyketide synthase
Mb1690	1867090	1871898	4406	1871495	G	A	TGC->C	TAC->Y	non-synonymous	polyketide synthase
Mb1692	1873412	1876465	103	1873514	A	G	ACT->T	GCT->A	non-synonymous	polyketide synthase
Mb1692	1873412	1876465	348	1873759	T	C	GCT->A	GCC->A	synonymous	polyketide synthase
Mb1692	1873412	1876465	1048	1874459	C	G	CCA->P	GCA->A	non-synonymous	polyketide synthase
Mb1693	1876612	1877673	163	1876774	C	G	CCG->P	GCG->A	non-synonymous	chalcone synthase
Mb1693	1876612	1877673	792	1877403	T	C	CAT->H	CAC->H	synonymous	chalcone synthase
Mb1694c	1878948	1877656	90	1878859	A	G	ACT->T	ACC->T	synonymous	cytochrome P450 139 CYP139
Mb1702c	1886371	1885637	176	1886196	G	A	GCC->A	GTC->V	non-synonymous	transcriptional regulator
Mb1705	1887793	1888695	777	1888569	T	C	ATT->I	ATC->I	synonymous	hypothetical protein
Mb1707	1889825	1890649	689	1890513	G	C	GGG->G	GCG->A	non-synonymous	hypothetical protein
Mb1708	1890646	1891638	829	1891474	A	G	ACC->T	GCC->A	non-synonymous	molybdopterin biosynthesis protein MoeX
Mb1712c	1897421	1896741	58	1897364	A	C	TTC->F	GTC->V	non-synonymous	integral membrane protein ABC transporter
Mb1713c	1898260	1897493	339	1897922	A	G	GCT->A	GCC->A	synonymous	ABC transporter ATP-binding protein
Mb1715	1898942	1900216	969	1899910	C	A	GCC->A	GCA->A	synonymous	tyrosyl-tRNA synthetase
Mb1722	1905025	1906788	438	1905462	T	G	CCT->P	CCG->P	synonymous	DNA repair protein recN (recombination protein N)
Mb1725	1909171	1910931	180	1909350	G	A	CCG->P	CCA->P	synonymous	CTP synthetase
Mb1725	1909171	1910931	1131	1910301	C	T	GGC->G	GGT->G	synonymous	CTP synthetase
Mb1726	1910924	1911547	129	1911052	G	C	TTG->L	TTC->F	non-synonymous	hypothetical protein
Mb1726	1910924	1911547	604	1911527	A	G	ACG->T	GCG->A	non-synonymous	hypothetical protein
Mb1730c	1916797	1915127	1107	1915691	T	C	GCA->A	GCG->A	synonymous	D-serine/alanine/glycine transporter protein CycA
Mb1734	1920223	1921683	814	1921036	G	T	GCC->A	TCC->S	non-synonymous	transmembrane protein
Mb1734	1920223	1921683	1313	1921535	A	G	CAG->Q	CGG->R	non-synonymous	transmembrane protein
Mb1735	1921701	1922657	166	1921866	A	G	ACG->T	GCG->A	non-synonymous	initiation inhibitor protein
Mb1742	1928000	1928563	564	1928563	A	G	TGA->*	TGG->W	non-synonymous	3-hydroxybutyrate dehydrogenase
Mb1745	1929747	1930097	63	1929809	C	G	TCC->S	TCG->S	synonymous	hypothetical protein
Mb1749c	1932759	1932370	138	1932622	A	G	CGT->R	CGC->R	synonymous	hypothetical protein
Mb1751	1933201	1934685	91	1933291	A	G	ATG->M	GTG->V	non-synonymous	biotin carboxylase
Mb1751	1933201	1934685	1221	1934421	T	C	CGT->R	CGC->R	synonymous	biotin carboxylase
Mb1755	1937192	1938577	181	1937372	C	G	CCG->P	GCG->A	non-synonymous	oxidoreductase
Mb1755	1937192	1938577	976	1938167	T	C	TAC->Y	CAC->H	non-synonymous	oxidoreductase
Mb1759c	1942642	1941089	1332	1941311	C	T	CGG->R	CGA->R	synonymous	penicillin-binding protein
Mb1759c	1942642	1941089	1305	1941338	G	C	GAC->D	GAG->E	non-synonymous	penicillin-binding protein
Mb1759c	1942642	1941089	723	1941920	A	C	ACT->T	ACG->T	synonymous	penicillin-binding protein
Mb1763c	1946413	1946171	235	1946179	C	T	GCA->A	ACA->T	non-synonymous	hypothetical protein
Mb1764c	1947185	1946688	54	1947132	A	G	GCT->A	GCC->A	synonymous	hypothetical protein
Mb1765c	1949583	1947625	1137	1948447	C	T	CGG->R	CGA->R	synonymous	nitrate reductase NarX
Mb1765c	1949583	1947625	230	1949354	C	T	GGC->G	GAC->D	non-synonymous	nitrate reductase NarX
Mb1765c	1949583	1947625	157	1949427	G	C	CAC->H	GAC->D	non-synonymous	nitrate reductase NarX
Mb1768c	1953034	1951352	612	1952423	C	T	GCG->A	GCA->A	synonymous	sulfate ABC transporter transmembrane protein
Mb1768c	1953034	1951352	95	1952940	C	A	GGC->G	GTC->V	non-synonymous	sulfate ABC transporter transmembrane protein
Mb1770	1953314	1953562	200	1953513	C	A	ACG->T	AAG->K	non-synonymous	hypothetical protein
Mb1772	1954402	1956102	167	1954568	A	T	GAC->D	GTC->V	non-synonymous	Ser/Thr protein kinase
Mb1773c	1956788	1956387	362	1956427	T	C	CAA->Q	CGA->R	non-synonymous	hypothetical protein
Mb1774c	1957389	1956859	531	1956859	T	G	TAA->*	TAC->Y	non-synonymous	isopentenyl-diphosphate delta-isomerase
Mb1774c	1957389	1956859	143	1957247	G	A	TCC->S	TTC->F	non-synonymous	isopentenyl-diphosphate delta-isomerase
Mb1775	1957536	1958966	973	1958508	A	G	ACC->T	GCC->A	non-synonymous	anchored-membrane serine/threonine-protein kinase PknF
Mb1776	1959028	1961625	2331	1961358	T	G	TCT->S	TCG->S	synonymous	ABC transporter ATP-binding protein
Mb1780	1965019	1966401	932	1965950	C	T	ACG->T	ATG->M	non-synonymous	hypothetical protein
Mb1780	1965019	1966401	1032	1966050	G	T	CCG->P	CCT->P	synonymous	hypothetical protein
Mb1782c	1970167	1967012	1719	1968449	T	G	CCA->P	CCC->P	synonymous	PPE family protein
Mb1782c	1970167	1967012	1485	1968683	C	T	CCG->P	CCA->P	synonymous	PPE family protein
Mb1783c	1972062	1970371	32	1972031	C	T	CGC->R	CAC->H	non-synonymous	hypothetical protein
Mb1795c	1989797	1989582	94	1989704	G	A	CGG->R	TGG->W	non-synonymous	transposase
Mb1797	1991054	1992928	619	1991672	C	A	CAC->H	AAC->N	non-synonymous	PE-PGRS family protein
Mb1798	1993084	1994328	466	1993549	T	C	TTG->L	CTG->L	synonymous	hypothetical protein
Mb1798	1993084	1994328	480	1993563	C	T	TTC->F	TTT->F	synonymous	hypothetical protein
Mb1798	1993084	1994328	1202	1994285	A	C	GAC->D	GCC->A	non-synonymous	hypothetical protein
Mb1799	1994336	1995622	362	1994697	C	T	GCC->A	GTC->V	non-synonymous	hypothetical protein
Mb1802c	1998224	1997478	573	1997652	A	G	TTT->F	TTC->F	synonymous	transcriptional regulator
Mb1806	2001114	2002418	972	2002085	G	C	CAG->Q	CAC->H	non-synonymous	cytochrome p450 144 CYP144
Mb1807c	2002988	2002539	95	2002894	C	G	AGA->R	ACA->T	non-synonymous	hypothetical protein
Mb1808c	2004937	2003144	891	2004047	T	C	CTA->L	CTG->L	synonymous	hypothetical protein
Mb1810c	2007934	2005760	186	2007749	C	T	CGG->R	CGA->R	synonymous	4-alpha-glucanotransferase
Mb1811	2008198	2009718	122	2008319	A	G	CAT->H	CGT->R	non-synonymous	hypothetical protein
Mb1811	2008198	2009718	1497	2009694	G	T	CCG->P	CCT->P	synonymous	hypothetical protein
Mb1812	2009715	2013890	2070	2011784	G	A	GCG->A	GCA->A	synonymous	hypothetical protein
Mb1812	2009715	2013890	2308	2012022	A	G	ATG->M	GTG->V	non-synonymous	hypothetical protein
Mb1813c	2015086	2013905	1001	2014086	C	G	GGA->G	GCA->A	non-synonymous	cytochrome P450 143
Mb1815	2015759	2016853	929	2016687	G	T	GGC->G	GTC->V	non-synonymous	PPE family protein
Mb1816	2016932	2017231	300	2017231	A	G	TAA->*	TAG->*	synonymous	PE family protein
Mb1817	2017245	2018426	820	2018064	G	T	GCG->A	TCG->S	non-synonymous	PPE family protein
Mb1818	2018880	2019932	568	2019447	T	C	TCG->S	CCG->P	non-synonymous	PPE family protein
Mb1818	2018880	2019932	765	2019644	G	A	CCG->P	CCA->P	synonymous	PPE family protein
Mb1819	2020359	2020658	123	2020481	T	C	CCT->P	CCC->P	synonymous	PE family protein
Mb1820	2020802	2021098	141	2020942	T	C	GGT->G	GGC->G	synonymous	hypothetical protein
Mb1820	2020802	2021098	142	2020943	C	A	CAG->Q	AAG->K	non-synonymous	hypothetical protein
Mb1820	2020802	2021098	143	2020944	A	T	CAG->Q	CTG->L	non-synonymous	hypothetical protein
Mb1820	2020802	2021098	175	2020976	C	T	CAG->Q	TAG->*	non-synonymous	hypothetical protein
Mb1822	2021521	2022423	111	2021631	T	G	CCT->P	CCG->P	synonymous	hypothetical protein
Mb1823	2022695	2024206	766	2023460	G	A	GCA->A	ACA->T	non-synonymous	hypothetical protein
Mb1823	2022695	2024206	782	2023476	A	G	GAT->D	GGT->G	non-synonymous	hypothetical protein
Mb1824	2024184	2025941	342	2024525	A	C	CCA->P	CCC->P	synonymous	Pro-rich protease
Mb1828	2029908	2031875	432	2030339	G	T	TGG->W	TGT->C	non-synonymous	PPE family protein
Mb1828	2029908	2031875	757	2030664	G	T	GTC->V	TTC->F	non-synonymous	PPE family protein
Mb1828	2029908	2031875	1508	2031415	C	T	GCC->A	GTC->V	non-synonymous	PPE family protein
Mb1830	2033839	2035230	512	2034350	C	T	CCG->P	CTG->L	non-synonymous	PPE family protein
Mb1832c	2037297	2037034	262	2037036	A	G	TAG->*	CAG->Q	non-synonymous	hypothetical protein
Mb1836	2038853	2040052	1098	2039950	T	C	CCT->P	CCC->P	synonymous	PPE family protein
Mb1837	2040376	2041605	141	2040516	G	A	TCG->S	TCA->S	synonymous	PPE family protein
Mb1838	2041737	2042300	562	2042298	T	C	TAA->*	CAA->Q	non-synonymous	hypothetical protein
Mb1842c	2045814	2044612	1053	2044762	A	G	ACT->T	ACC->T	synonymous	dehydrogenase
Mb1846	2048711	2049415	27	2048737	G	A	AAG->K	AAA->K	synonymous	transcriptional regulator
Mb1849c	2053138	2051633	697	2052442	T	C	AGC->S	GGC->G	non-synonymous	PE-PGRS family protein
Mb1850c	2055192	2053273	1807	2053386	C	T	GTC->V	ATC->I	non-synonymous	drugs-transport transmembrane ATP-binding protein ABC transporter
Mb1850c	2055192	2053273	353	2054840	G	A	GCG->A	GTG->V	non-synonymous	drugs-transport transmembrane ATP-binding protein ABC transporter
Mb1851	2055263	2056906	249	2055511	A	G	CCA->P	CCG->P	synonymous	hypothetical protein
Mb1852	2056921	2059347	1228	2058148	G	A	GTG->V	ATG->M	non-synonymous	preprotein translocase subunit SecA
Mb1854	2060166	2061089	70	2060235	C	A	CAG->Q	AAG->K	non-synonymous	hypothetical protein
Mb1857	2062416	2062820	239	2062654	C	A	GCG->A	GAG->E	non-synonymous	glycine cleavage system protein H
Mb1857	2062416	2062820	362	2062777	C	A	ACA->T	AAA->K	non-synonymous	glycine cleavage system protein H
Mb1860	2064407	2064901	277	2064683	T	C	TGC->C	CGC->R	non-synonymous	hypothetical protein
Mb1861	2065193	2065870	249	2065441	C	T	TAC->Y	TAT->Y	synonymous	hypothetical protein
Mb1863	2066229	2069054	644	2066872	C	T	GCC->A	GTC->V	non-synonymous	glycine dehydrogenase
Mb1863	2066229	2069054	1342	2067570	G	A	GCG->A	ACG->T	non-synonymous	glycine dehydrogenase
Mb1863	2066229	2069054	2370	2068598	C	G	GGC->G	GGG->G	synonymous	glycine dehydrogenase
Mb1863	2066229	2069054	2442	2068670	T	C	GTT->V	GTC->V	synonymous	glycine dehydrogenase
Mb1865	2070182	2071048	815	2070996	C	T	GCC->A	GTC->V	non-synonymous	hydrolase
Mb1866c	2072939	2071053	535	2072405	A	G	TGC->C	CGC->R	non-synonymous	hypothetical protein
Mb1867c	2074988	2072955	1772	2073217	T	C	CAT->H	CGT->R	non-synonymous	hypothetical protein
Mb1867c	2074988	2072955	409	2074580	A	G	TGC->C	CGC->R	non-synonymous	hypothetical protein
Mb1868c	2077333	2075108	310	2077024	C	T	GGT->G	AGT->S	non-synonymous	malate synthase G
Mb1871c	2079723	2078323	1320	2078404	C	T	GGG->G	GGA->G	synonymous	PE-PGRS family protein
Mb1873c	2082302	2080935	1310	2080993	G	A	TCG->S	TTG->L	non-synonymous	hypothetical protein
Mb1874c	2083915	2082476	1011	2082905	A	G	GGT->G	GGC->G	synonymous	inosine 5-monophosphate dehydrogenase
Mb1875c	2085338	2083281	1407	2083932	C	T	AAG->K	AAA->K	synonymous	6-phosphogluconate dehydrogenase
Mb1877c	2086809	2086393	274	2086536	A	C	TAC->Y	GAC->D	non-synonymous	transcriptional regulator
Mb1878	2087086	2087508	252	2087337	T	C	AAT->N	AAC->N	synonymous	hypothetical protein
Mb1878	2087086	2087508	268	2087353	C	G	CTG->L	GTG->V	non-synonymous	hypothetical protein
Mb1878	2087086	2087508	394	2087479	C	T	CGG->R	TGG->W	non-synonymous	hypothetical protein
Mb1882	2089903	2090538	100	2090002	T	A	TTG->L	ATG->M	non-synonymous	urease accessory protein uref
Mb1885c	2093251	2091860	850	2092402	A	G	TGG->W	CGG->R	non-synonymous	NADH dehydrogenase
Mb1887c	2095031	2094354	554	2094478	T	C	CAC->H	CGC->R	non-synonymous	short chain dehydrogenase
Mb1887c	2095031	2094354	399	2094633	T	C	GCA->A	GCG->A	synonymous	short chain dehydrogenase
Mb1890	2096782	2097891	938	2097719	T	C	ATG->M	ACG->T	non-synonymous	molybdenum ABC transporter ATP-binding protein
Mb1893	2099753	2100793	822	2100574	C	A	ACC->T	ACA->T	synonymous	alcohol dehydrogenase
Mb1896c	2103175	2102315	135	2103041	A	C	GCT->A	GCG->A	synonymous	short chain dehydrogenase
Mb1897	2103349	2105685	49	2103397	C	G	CAA->Q	GAA->E	non-synonymous	hypothetical protein
Mb1901c	2111639	2110971	654	2110986	T	C	CTA->L	CTG->L	synonymous	hypothetical protein
Mb1901c	2111639	2110971	635	2111005	A	T	TTA->L	TAA->*	non-synonymous	hypothetical protein
Mb1903c	2113360	2112116	757	2112604	C	T	GTG->V	ATG->M	non-synonymous	L-lactate dehydrogenase (cytochrome) LldD2
Mb1903c	2113360	2112116	527	2112834	G	A	GCC->A	GTC->V	non-synonymous	L-lactate dehydrogenase (cytochrome) LldD2
Mb1904	2113383	2113820	105	2113487	G	T	GGG->G	GGT->G	synonymous	hypothetical protein
Mb1904	2113383	2113820	304	2113686	A	G	AAC->N	GAC->D	non-synonymous	hypothetical protein
Mb1910	2118232	2119584	351	2118582	G	A	ACG->T	ACA->T	synonymous	glutamine synthetase
Mb1910	2118232	2119584	823	2119054	A	G	ACG->T	GCG->A	non-synonymous	glutamine synthetase
Mb1910	2118232	2119584	1260	2119491	A	C	GCA->A	GCC->A	synonymous	glutamine synthetase
Mb1918c	2126092	2125115	714	2125379	G	T	CCC->P	CCA->P	synonymous	secreted antigen 85-B FbpB
Mb1920c	2128314	2127595	177	2128138	A	G	GGT->G	GGC->G	synonymous	transmembrane protein
Mb1921c	2128852	2128679	165	2128688	C	T	GGG->G	GGA->G	synonymous	hypothetical protein
Mb1929	2133076	2133780	683	2133758	T	C	CTT->L	CCT->P	non-synonymous	dehydrogenase
Mb1932c	2135117	2134686	246	2134872	A	G	GAT->D	GAC->D	synonymous	D-tyrosyl-tRNA(Tyr) deacylase
Mb1934c	2136525	2135449	413	2136113	G	A	CCG->P	CTG->L	non-synonymous	lipoprotein LppD
Mb1935c	2137913	2136525	509	2137405	T	C	CAG->Q	CGG->R	non-synonymous	lignin peroxidase LIPJ
Mb1939	2141234	2141665	225	2141458	T	C	GAT->D	GAC->D	synonymous	hypothetical protein
Mb1939	2141234	2141665	269	2141502	T	G	TTG->L	TGG->W	non-synonymous	hypothetical protein
Mb1939	2141234	2141665	392	2141625	T	C	ATG->M	ACG->T	non-synonymous	hypothetical protein
Mb1940c	2142675	2141713	718	2141958	T	G	ACC->T	CCC->P	non-synonymous	D-amino acid oxidase aao
Mb1943c	2146391	2144169	1217	2145175	T	C	GAC->D	GGC->G	non-synonymous	catalase-peroxidase-peroxynitritase T KATG
Mb1943c	2146391	2144169	949	2145443	T	C	ATC->I	GTC->V	non-synonymous	catalase-peroxidase-peroxynitritase T KATG
Mb1943c	2146391	2144169	944	2145448	C	T	AGC->S	AAC->N	non-synonymous	catalase-peroxidase-peroxynitritase T KATG
Mb1943c	2146391	2144169	609	2145783	A	G	ACT->T	ACC->T	synonymous	catalase-peroxidase-peroxynitritase T KATG
Mb1943c	2146391	2144169	87	2146305	T	G	CCA->P	CCC->P	synonymous	catalase-peroxidase-peroxynitritase T KATG
Mb1945c	2147579	2146986	432	2147148	T	G	GGA->G	GGC->G	synonymous	hypothetical protein
Mb1945c	2147579	2146986	378	2147202	T	A	ACA->T	ACT->T	synonymous	hypothetical protein
Mb1950	2150743	2153043	1441	2152183	G	A	GAC->D	AAC->N	non-synonymous	isocitrate lyase
Mb1951c	2158945	2153213	5605	2153341	A	G	TTA->L	CTA->L	synonymous	PPE family protein
Mb1951c	2158945	2153213	4819	2154127	C	T	GAT->D	AAT->N	non-synonymous	PPE family protein
Mb1951c	2158945	2153213	2385	2156561	T	A	GCA->A	GCT->A	synonymous	PPE family protein
Mb1951c	2158945	2153213	2037	2156909	A	C	CCT->P	CCG->P	synonymous	PPE family protein
Mb1951c	2158945	2153213	2031	2156915	A	G	GTT->V	GTC->V	synonymous	PPE family protein
Mb1951c	2158945	2153213	2029	2156917	C	T	GTT->V	ATT->I	non-synonymous	PPE family protein
Mb1951c	2158945	2153213	2028	2156918	A	G	AAT->N	AAC->N	synonymous	PPE family protein
Mb1951c	2158945	2153213	2022	2156924	T	G	CCA->P	CCC->P	synonymous	PPE family protein
Mb1951c	2158945	2153213	2019	2156927	C	G	GGG->G	GGC->G	synonymous	PPE family protein
Mb1951c	2158945	2153213	2016	2156930	C	A	GTG->V	GTT->V	synonymous	PPE family protein
Mb1951c	2158945	2153213	2013	2156933	C	G	TTG->L	TTC->F	non-synonymous	PPE family protein
Mb1951c	2158945	2153213	2011	2156935	A	G	TTG->L	CTG->L	synonymous	PPE family protein
Mb1951c	2158945	2153213	2010	2156936	C	T	GCG->A	GCA->A	synonymous	PPE family protein
Mb1951c	2158945	2153213	2004	2156942	C	G	TCG->S	TCC->S	synonymous	PPE family protein
Mb1951c	2158945	2153213	2002	2156944	A	T	TCG->S	ACG->T	non-synonymous	PPE family protein
Mb1951c	2158945	2153213	1998	2156948	A	G	AGT->S	AGC->S	synonymous	PPE family protein
Mb1951c	2158945	2153213	1997	2156949	C	T	AGT->S	AAT->N	non-synonymous	PPE family protein
Mb1951c	2158945	2153213	1995	2156951	C	G	GTG->V	GTC->V	synonymous	PPE family protein
Mb1951c	2158945	2153213	1993	2156953	C	T	GTG->V	ATG->M	non-synonymous	PPE family protein
Mb1951c	2158945	2153213	1992	2156954	A	G	GGT->G	GGC->G	synonymous	PPE family protein
Mb1951c	2158945	2153213	1987	2156959	A	G	TTG->L	CTG->L	synonymous	PPE family protein
Mb1951c	2158945	2153213	1986	2156960	A	C	GGT->G	GGG->G	synonymous	PPE family protein
Mb1951c	2158945	2153213	1914	2157032	A	G	GGT->G	GGC->G	synonymous	PPE family protein
Mb1955	2163258	2164121	390	2163647	C	G	ATC->I	ATG->M	non-synonymous	hypothetical protein
Mb1955	2163258	2164121	758	2164015	A	C	GAG->E	GCG->A	non-synonymous	hypothetical protein
Mb1957	2165702	2166817	520	2166221	A	C	AGG->R	CGG->R	synonymous	lipoprotein
Mb1958	2166808	2168148	218	2167025	A	G	GAT->D	GGT->G	non-synonymous	lipase LIPD
Mb1958	2166808	2168148	541	2167348	A	G	AAC->N	GAC->D	non-synonymous	lipase LIPD
Mb1960	2168722	2170584	280	2169001	C	T	CGC->R	TGC->C	non-synonymous	fatty-acid--CoA ligase
Mb1962	2171308	2172081	153	2171460	G	C	GAG->E	GAC->D	non-synonymous	hypothetical protein
Mb1969c	2177823	2176594	515	2177309	A	G	ATC->I	ACC->T	non-synonymous	acyl-CoA dehydrogenase
Mb1971	2179019	2180128	204	2179222	G	C	CAG->Q	CAC->H	non-synonymous	monooxygenase
Mb1972	2180131	2182650	147	2180277	T	C	TGT->C	TGC->C	synonymous	oxygenase
Mb1973	2182662	2183732	472	2183133	G	T	GGG->G	TGG->W	non-synonymous	epoxide hydrolase
Mb1980	2187623	2188987	727	2188349	C	G	CTC->L	GTC->V	non-synonymous	hypothetical protein
Mb1980	2187623	2188987	1188	2188810	A	G	ACA->T	ACG->T	synonymous	hypothetical protein
Mb1981c	2189594	2189142	292	2189303	T	C	ACG->T	GCG->A	non-synonymous	lipoprotein
Mb1984c	2191611	2190709	562	2191050	G	A	CTT->L	TTT->F	non-synonymous	hypothetical protein
Mb1989c	2193378	2192857	449	2192930	C	T	CGC->R	CAC->H	non-synonymous	hypothetical protein
Mb1991	2193772	2194221	363	2194134	C	T	CAC->H	CAT->H	synonymous	transcriptional regulator
Mb2000	2199824	2200672	428	2200251	G	A	GGC->G	GAC->D	non-synonymous	hypothetical protein
Mb2000	2199824	2200672	677	2200500	G	C	AGT->S	ACT->T	non-synonymous	hypothetical protein
Mb2001c	2202080	2200635	857	2201224	C	T	GGC->G	GAC->D	non-synonymous	permease
Mb2003c	2204104	2203136	14	2204091	C	A	CGC->R	CTC->L	non-synonymous	ribonucleotide-diphosphate reductase subunit beta
Mb2005	2205160	2206836	658	2205817	A	G	ACA->T	GCA->A	non-synonymous	PE-PGRS family protein
Mb2008	2208927	2209526	35	2208961	G	A	TGC->C	TAC->Y	non-synonymous	hypothetical protein
Mb2015c	2216222	2213907	2220	2214003	G	A	TTC->F	TTT->F	synonymous	metal cation transporter P-type ATPase G CtpG
Mb2020	2219075	2221792	1584	2220658	G	A	CCG->P	CCA->P	synonymous	metal cation transporter P-type ATPase A CtpF
Mb2021c	2222637	2221861	688	2221950	G	T	CGC->R	AGC->S	non-synonymous	hypothetical protein
Mb2022c	2224054	2222732	796	2223259	T	G	AGG->R	CGG->R	synonymous	hypothetical protein
Mb2022c	2224054	2222732	718	2223337	G	T	CTG->L	ATG->M	non-synonymous	hypothetical protein
Mb2023	2224125	2225738	656	2224780	C	A	CCG->P	CAG->Q	non-synonymous	hypothetical protein
Mb2024	2225748	2226500	129	2225876	C	G	GTC->V	GTG->V	synonymous	hypothetical protein
Mb2024	2225748	2226500	338	2226085	A	G	CAC->H	CGC->R	non-synonymous	hypothetical protein
Mb2028c	2230799	2229912	279	2230521	G	A	AGC->S	AGT->S	synonymous	hypothetical protein
Mb2029	2230918	2234901	238	2231155	A	G	AGT->S	GGT->G	non-synonymous	trehalose-6-phosphate phosphatase OtsB1
Mb2029	2230918	2234901	1098	2232015	C	A	GCC->A	GCA->A	synonymous	trehalose-6-phosphate phosphatase OtsB1
Mb2029	2230918	2234901	3734	2234651	C	T	CCG->P	CTG->L	non-synonymous	trehalose-6-phosphate phosphatase OtsB1
Mb2032	2236946	2237188	187	2237132	G	A	GAC->D	AAC->N	non-synonymous	hypothetical protein
Mb2037	2240014	2240604	144	2240157	G	A	GAG->E	GAA->E	synonymous	transposase
Mb2038c	2241988	2240732	900	2241089	C	A	CGG->R	CGT->R	synonymous	hypothetical protein
Mb2038c	2241988	2240732	897	2241092	G	A	CGC->R	CGT->R	synonymous	hypothetical protein
Mb2038c	2241988	2240732	834	2241155	G	A	TTC->F	TTT->F	synonymous	hypothetical protein
Mb2038c	2241988	2240732	453	2241536	T	A	GAA->E	GAT->D	non-synonymous	hypothetical protein
Mb2038c	2241988	2240732	176	2241813	A	G	TTG->L	TCG->S	non-synonymous	hypothetical protein
Mb2041	2244196	2244915	347	2244542	G	A	GGC->G	GAC->D	non-synonymous	hypothetical protein
Mb2044c	2246026	2245721	96	2245931	T	C	GCA->A	GCG->A	synonymous	hypothetical protein
Mb2046c	2247024	2246665	133	2246892	T	G	AGG->R	CGG->R	synonymous	hypothetical protein
Mb2047c	2247861	2247184	549	2247313	T	C	TTA->L	TTG->L	synonymous	hypothetical protein
Mb2047c	2247861	2247184	513	2247349	C	A	CAG->Q	CAT->H	non-synonymous	hypothetical protein
Mb2047c	2247861	2247184	319	2247543	G	C	CAA->Q	GAA->E	non-synonymous	hypothetical protein
Mb2049c	2254156	2249336	1021	2253136	C	A	GTC->V	TTC->F	non-synonymous	hypothetical protein
Mb2049c	2254156	2249336	865	2253292	A	G	TGC->C	CGC->R	non-synonymous	hypothetical protein
Mb2049c	2254156	2249336	696	2253461	G	A	AGC->S	AGT->S	synonymous	hypothetical protein
Mb2052c	2258422	2256701	46	2258377	C	A	GTG->V	TTG->L	non-synonymous	histidine kinase response regulator
Mb2058	2263042	2264037	953	2263994	T	C	CTA->L	CCA->P	non-synonymous	hypothetical protein
Mb2062	2266012	2266653	278	2266289	T	C	GTT->V	GCT->A	non-synonymous	hypothetical protein
Mb2062	2266012	2266653	279	2266290	T	C	GTT->V	GTC->V	synonymous	hypothetical protein
Mb2063c	2267634	2266660	531	2267104	G	C	GCC->A	GCG->A	synonymous	transmembrane protein
Mb2067c	2271759	2270440	365	2271395	A	G	GTT->V	GCT->A	non-synonymous	sugar-binding lipoprotein
Mb2068c	2272594	2271797	597	2271998	G	C	GCC->A	GCG->A	synonymous	hypothetical protein
Mb2069c	2273154	2272594	169	2272986	C	G	GAC->D	CAC->H	non-synonymous	pyrazinamidase
Mb2072	2275182	2275838	49	2275230	C	T	CCG->P	TCG->S	non-synonymous	lipoprotein LppI
Mb2073c	2278439	2275875	520	2277920	T	C	ACG->T	GCG->A	non-synonymous	hypothetical protein
Mb2074c	2290899	2278444	12141	2278759	T	C	TCA->S	TCG->S	synonymous	polyketide synthase
Mb2074c	2290899	2278444	12139	2278761	A	C	TCA->S	GCA->A	non-synonymous	polyketide synthase
Mb2074c	2290899	2278444	12138	2278762	A	C	CTT->L	CTG->L	synonymous	polyketide synthase
Mb2074c	2290899	2278444	12111	2278789	A	G	CGT->R	CGC->R	synonymous	polyketide synthase
Mb2074c	2290899	2278444	12093	2278807	C	G	TTG->L	TTC->F	non-synonymous	polyketide synthase
Mb2074c	2290899	2278444	12091	2278809	A	G	TTG->L	CTG->L	synonymous	polyketide synthase
Mb2074c	2290899	2278444	12084	2278816	A	G	TTT->F	TTC->F	synonymous	polyketide synthase
Mb2074c	2290899	2278444	12076	2278824	G	A	CTG->L	TTG->L	synonymous	polyketide synthase
Mb2074c	2290899	2278444	12075	2278825	G	C	GAC->D	GAG->E	non-synonymous	polyketide synthase
Mb2074c	2290899	2278444	11961	2278939	C	T	GGG->G	GGA->G	synonymous	polyketide synthase
Mb2074c	2290899	2278444	11958	2278942	G	T	CAC->H	CAA->Q	non-synonymous	polyketide synthase
Mb2074c	2290899	2278444	11956	2278944	G	C	CAC->H	GAC->D	non-synonymous	polyketide synthase
Mb2074c	2290899	2278444	11949	2278951	A	T	CAT->H	CAA->Q	non-synonymous	polyketide synthase
Mb2074c	2290899	2278444	11945	2278955	G	A	GCG->A	GTG->V	non-synonymous	polyketide synthase
Mb2074c	2290899	2278444	11944	2278956	C	G	GCG->A	CCG->P	non-synonymous	polyketide synthase
Mb2074c	2290899	2278444	11943	2278957	G	C	CTC->L	CTG->L	synonymous	polyketide synthase
Mb2074c	2290899	2278444	11940	2278960	C	A	GCG->A	GCT->A	synonymous	polyketide synthase
Mb2074c	2290899	2278444	11683	2279217	T	C	AGC->S	GGC->G	non-synonymous	polyketide synthase
Mb2074c	2290899	2278444	11302	2279598	C	A	GTG->V	TTG->L	non-synonymous	polyketide synthase
Mb2074c	2290899	2278444	11295	2279605	T	C	GTA->V	GTG->V	synonymous	polyketide synthase
Mb2074c	2290899	2278444	11044	2279856	G	A	CGC->R	TGC->C	non-synonymous	polyketide synthase
Mb2074c	2290899	2278444	10806	2280094	A	G	GGT->G	GGC->G	synonymous	polyketide synthase
Mb2074c	2290899	2278444	10564	2280336	G	A	CCG->P	TCG->S	non-synonymous	polyketide synthase
Mb2074c	2290899	2278444	10563	2280337	T	C	CAA->Q	CAG->Q	synonymous	polyketide synthase
Mb2074c	2290899	2278444	10562	2280338	T	C	CAA->Q	CGA->R	non-synonymous	polyketide synthase
Mb2074c	2290899	2278444	10561	2280339	G	T	CAA->Q	AAA->K	non-synonymous	polyketide synthase
Mb2074c	2290899	2278444	10560	2280340	T	A	GTA->V	GTT->V	synonymous	polyketide synthase
Mb2074c	2290899	2278444	10559	2280341	A	G	GTA->V	GCA->A	non-synonymous	polyketide synthase
Mb2074c	2290899	2278444	10557	2280343	G	A	GAC->D	GAT->D	synonymous	polyketide synthase
Mb2074c	2290899	2278444	10556	2280344	T	G	GAC->D	GCC->A	non-synonymous	polyketide synthase
Mb2074c	2290899	2278444	8794	2282106	T	C	AGC->S	GGC->G	non-synonymous	polyketide synthase
Mb2074c	2290899	2278444	8793	2282107	G	T	GCC->A	GCA->A	synonymous	polyketide synthase
Mb2074c	2290899	2278444	5898	2285002	C	T	CTG->L	CTA->L	synonymous	polyketide synthase
Mb2074c	2290899	2278444	5593	2285307	T	C	AGC->S	GGC->G	non-synonymous	polyketide synthase
Mb2074c	2290899	2278444	4954	2285946	G	A	CGC->R	TGC->C	non-synonymous	polyketide synthase
Mb2074c	2290899	2278444	4887	2286013	G	A	GCC->A	GCT->A	synonymous	polyketide synthase
Mb2074c	2290899	2278444	4883	2286017	A	T	CTT->L	CAT->H	non-synonymous	polyketide synthase
Mb2074c	2290899	2278444	4881	2286019	G	T	ATC->I	ATA->I	synonymous	polyketide synthase
Mb2074c	2290899	2278444	4879	2286021	T	C	ATC->I	GTC->V	non-synonymous	polyketide synthase
Mb2074c	2290899	2278444	4878	2286022	C	T	CAG->Q	CAA->Q	synonymous	polyketide synthase
Mb2074c	2290899	2278444	4877	2286023	T	G	CAG->Q	CCG->P	non-synonymous	polyketide synthase
Mb2074c	2290899	2278444	4876	2286024	G	A	CAG->Q	TAG->*	non-synonymous	polyketide synthase
Mb2074c	2290899	2278444	4875	2286025	C	T	GCG->A	GCA->A	synonymous	polyketide synthase
Mb2074c	2290899	2278444	4869	2286031	G	C	CGC->R	CGG->R	synonymous	polyketide synthase
Mb2074c	2290899	2278444	4865	2286035	T	G	GAC->D	GCC->A	non-synonymous	polyketide synthase
Mb2074c	2290899	2278444	4864	2286036	C	G	GAC->D	CAC->H	non-synonymous	polyketide synthase
Mb2074c	2290899	2278444	4863	2286037	C	A	CCG->P	CCT->P	synonymous	polyketide synthase
Mb2074c	2290899	2278444	4862	2286038	G	C	CCG->P	CGG->R	non-synonymous	polyketide synthase
Mb2074c	2290899	2278444	4855	2286045	C	G	GCG->A	CCG->P	non-synonymous	polyketide synthase
Mb2083c	2298738	2298574	137	2298602	C	A	CGT->R	CTT->L	non-synonymous	50S ribosomal protein L33
Mb2085	2299087	2300622	213	2299299	C	A	CAC->H	CAA->Q	non-synonymous	hypothetical protein
Mb2085	2299087	2300622	950	2300036	C	A	ACA->T	AAA->K	non-synonymous	hypothetical protein
Mb2088c	2304666	2301082	2029	2302638	C	T	GAA->E	AAA->K	non-synonymous	cobaltochelatase subunit CobN
Mb2088c	2304666	2301082	434	2304233	C	T	CGT->R	CAT->H	non-synonymous	cobaltochelatase subunit CobN
Mb2088c	2304666	2301082	224	2304443	G	A	GCA->A	GTA->V	non-synonymous	cobaltochelatase subunit CobN
Mb2090	2305364	2306455	525	2305888	T	C	GAT->D	GAC->D	synonymous	cobalamin biosynthesis protein CobG
Mb2097c	2312891	2312136	384	2312508	A	G	GGT->G	GGC->G	synonymous	precorrin-4 C(11)-methyltransferase
Mb2097c	2312891	2312136	351	2312541	T	C	GCA->A	GCG->A	synonymous	precorrin-4 C(11)-methyltransferase
Mb2098c	2313772	2312888	393	2313380	T	C	CCA->P	CCG->P	synonymous	precorrin-6y methyltransferase
Mb2104	2316945	2317259	69	2317013	T	C	CAT->H	CAC->H	synonymous	hypothetical protein
Mb2105	2317241	2319211	647	2317887	T	C	CTC->L	CCC->P	non-synonymous	hypothetical protein
Mb2105	2317241	2319211	771	2318011	T	G	AAT->N	AAG->K	non-synonymous	hypothetical protein
Mb2105	2317241	2319211	775	2318015	A	G	AAC->N	GAC->D	non-synonymous	hypothetical protein
Mb2105	2317241	2319211	776	2318016	A	G	AAC->N	AGC->S	non-synonymous	hypothetical protein
Mb2105	2317241	2319211	1825	2319065	C	T	CAA->Q	TAA->*	non-synonymous	hypothetical protein
Mb2106	2319192	2319755	68	2319259	C	T	GCG->A	GTG->V	non-synonymous	lipoprotein LppJ
Mb2108	2320598	2322763	102	2320699	T	C	CGT->R	CGC->R	synonymous	hypothetical protein
Mb2108	2320598	2322763	103	2320700	A	G	AAG->K	GAG->E	non-synonymous	hypothetical protein
Mb2108	2320598	2322763	1127	2321724	C	T	CCC->P	CTC->L	non-synonymous	hypothetical protein
Mb2108	2320598	2322763	1981	2322578	T	C	TTA->L	CTA->L	synonymous	hypothetical protein
Mb2109	2322760	2323704	160	2322919	A	G	ACG->T	GCG->A	non-synonymous	hypothetical protein
Mb2115	2326311	2328080	89	2326399	T	G	CTG->L	CGG->R	non-synonymous	Ser/Thr protein kinase
Mb2116c	2329224	2328097	1007	2328218	G	A	CCG->P	CTG->L	non-synonymous	dipeptidase PepE
Mb2117	2329273	2330397	311	2329583	T	C	ATA->I	ACA->T	non-synonymous	5'-3' exonuclease
Mb2117	2329273	2330397	403	2329675	C	A	CGG->R	AGG->R	synonymous	5'-3' exonuclease
Mb2119c	2333897	2331177	1869	2332029	G	A	CGC->R	CGT->R	synonymous	ATP-dependent DNA helicase HelY
Mb2119c	2333897	2331177	533	2333365	A	G	ATG->M	ACG->T	non-synonymous	ATP-dependent DNA helicase HelY
Mb2122c	2336158	2335208	800	2335359	A	G	GTC->V	GCC->A	non-synonymous	hypothetical protein
Mb2123c	2337153	2336155	520	2336634	A	G	TCG->S	CCG->P	non-synonymous	hypothetical protein
Mb2127	2342081	2345122	1954	2344034	T	G	TCG->S	GCG->A	non-synonymous	helicase HelZ
Mb2129c	2346361	2345927	46	2346316	T	C	ACA->T	GCA->A	non-synonymous	hypothetical protein
Mb2136c	2352994	2351387	20	2352975	C	G	CGT->R	CCT->P	non-synonymous	hypothetical protein
Mb2137	2353055	2354248	619	2353673	C	A	CCG->P	ACG->T	non-synonymous	hypothetical protein
Mb2137	2353055	2354248	833	2353887	T	C	TTG->L	TCG->S	non-synonymous	hypothetical protein
Mb2137	2353055	2354248	1134	2354188	T	C	TAT->Y	TAC->Y	synonymous	hypothetical protein
Mb2147	2361496	2362890	513	2362008	C	T	AGC->S	AGT->S	synonymous	PPE family protein
Mb2147	2361496	2362890	536	2362031	T	G	ATC->I	AGC->S	non-synonymous	PPE family protein
Mb2148c	2366465	2362887	2254	2364212	C	T	GTC->V	ATC->I	non-synonymous	5-methyltetrahydrofolate--homocysteine methyltransferase
Mb2148c	2366465	2362887	1305	2365161	C	A	CGG->R	CGT->R	synonymous	5-methyltetrahydrofolate--homocysteine methyltransferase
Mb2151	2369014	2370483	130	2369143	A	G	AGC->S	GGC->G	non-synonymous	L-asparagine permease ansP1
Mb2156	2373809	2374039	105	2373913	C	T	CGC->R	CGT->R	synonymous	hypothetical protein
Mb2160c	2377236	2376406	211	2377026	C	A	GTG->V	TTG->L	non-synonymous	undecaprenyl pyrophosphate phosphatase
Mb2162	2377728	2378804	1042	2378769	T	G	TCC->S	GCC->A	non-synonymous	lipoprotein LppL
Mb2162	2377728	2378804	1043	2378770	C	T	TCC->S	TTC->F	non-synonymous	lipoprotein LppL
Mb2162	2377728	2378804	1045	2378772	A	C	AGG->R	CGG->R	synonymous	lipoprotein LppL
Mb2162	2377728	2378804	1046	2378773	G	A	AGG->R	AAG->K	non-synonymous	lipoprotein LppL
Mb2162	2377728	2378804	1048	2378775	T	G	TTC->F	GTC->V	non-synonymous	lipoprotein LppL
Mb2163	2379118	2380191	1015	2380132	G	A	GGC->G	AGC->S	non-synonymous	dihydroorotate dehydrogenase 2
Mb2167	2383491	2384549	723	2384213	C	G	CTC->L	CTG->L	synonymous	hypothetical protein
Mb2172c	2388130	2387354	506	2387625	G	A	CCC->P	CTC->L	non-synonymous	hypothetical protein
Mb2175c	2391155	2390211	904	2390252	T	C	ACG->T	GCG->A	non-synonymous	cell division protein FtsQ
Mb2176c	2392636	2391152	627	2392010	G	A	TTC->F	TTT->F	synonymous	UDP-N-acetylmuramate--L-alanine ligase
Mb2177c	2393865	2392633	221	2393645	G	A	CCC->P	CTC->L	non-synonymous	undecaprenyldiphospho-muramoylpentapeptide beta-N-acetylglucosaminyltransferase
Mb2179c	2396908	2395448	1044	2395865	A	C	GTT->V	GTG->V	synonymous	UDP-N-acetylmuramoyl-L-alanyl-D-glutamate synthetase
Mb2182c	2401122	2399515	1467	2399656	G	A	GTC->V	GTT->V	synonymous	UDP-N-acetylmuramoylalanyl-D-glutamate--2,6-diaminopimelate ligase
Mb2188c	2408630	2407476	605	2408026	G	A	GCT->A	GTT->V	non-synonymous	hypothetical protein
Mb2189c	2409661	2408627	753	2408909	A	G	GCT->A	GCC->A	synonymous	S-adenosyl-methyltransferase MraW
Mb2196	2414943	2416493	1351	2416293	T	G	TCA->S	GCA->A	non-synonymous	hypothetical protein
Mb2197c	2416920	2416480	50	2416871	A	G	CTC->L	CCC->P	non-synonymous	regulatory protein
Mb2198	2416975	2418174	154	2417128	G	T	GCT->A	TCT->S	non-synonymous	Ser/Thr protein kinase
Mb2199c	2418981	2418316	344	2418638	T	G	AAA->K	ACA->T	non-synonymous	transposase
Mb2202c	2422248	2421361	747	2421502	C	T	TGG->W	TGA->*	non-synonymous	hypothetical protein
Mb2202c	2422248	2421361	466	2421783	T	G	ACG->T	CCG->P	non-synonymous	hypothetical protein
Mb2204c	2424363	2423620	378	2423986	C	A	GGG->G	GGT->G	synonymous	1-acylglycerol-3-phosphate O-acyltransferase
Mb2207c	2426534	2426100	75	2426460	T	G	ATA->I	ATC->I	synonymous	hypothetical protein
Mb2210	2427469	2428995	860	2428328	A	G	GAG->E	GGG->G	non-synonymous	long-chain-fatty-acid-CoA ligase
Mb2212c	2431053	2430280	321	2430733	A	C	GCT->A	GCG->A	synonymous	hypothetical protein
Mb2214	2432852	2434789	1114	2433965	A	G	ACG->T	GCG->A	non-synonymous	hypothetical protein
Mb2214	2432852	2434789	1116	2433967	G	A	ACG->T	ACA->T	synonymous	hypothetical protein
Mb2218	2437425	2438714	843	2438267	C	G	ATC->I	ATG->M	non-synonymous	Rieske iron-sulfur protein QcrA
Mb2220c	2441295	2440651	604	2440692	A	C	TCT->S	GCT->A	non-synonymous	transmembrane protein
Mb2226	2447378	2448070	291	2447668	T	C	GTT->V	GTC->V	synonymous	hypothetical protein
Mb2228c	2449610	2448534	267	2449344	G	A	TGC->C	TGT->C	synonymous	hypothetical protein
Mb2231	2451640	2452389	464	2452103	C	T	TCG->S	TTG->L	non-synonymous	cobalamin synthase
Mb2232	2452547	2454085	1287	2453833	C	T	CGC->R	CGT->R	synonymous	hypothetical protein
Mb2233c	2455117	2454011	855	2454263	A	G	TTT->F	TTC->F	synonymous	branched-chain amino acid aminotransferase
Mb2233c	2455117	2454011	83	2455035	G	T	GCG->A	GAG->E	non-synonymous	branched-chain amino acid aminotransferase
Mb2236	2457485	2459032	630	2458114	G	C	TTG->L	TTC->F	non-synonymous	leucyl aminopeptidase
Mb2240	2463731	2464423	218	2463948	G	A	GGC->G	GAC->D	non-synonymous	lipoate-protein ligase B
Mb2242	2465382	2466134	220	2465601	C	T	CTC->L	TTC->F	non-synonymous	transmembrane protein
Mb2245c	2471500	2468516	757	2470744	G	T	CGG->R	AGG->R	synonymous	bifunctional glutamine-synthetase adenylyltransferase/deadenyltransferase
Mb2248c	2476170	2474608	1524	2474647	C	T	TTG->L	TTA->L	synonymous	exported protease
Mb2250	2477979	2479520	92	2478070	A	G	GAC->D	GGC->G	non-synonymous	hypothetical protein
Mb2251	2480078	2480398	219	2480296	C	T	GCC->A	GCT->A	synonymous	hypothetical protein
Mb2252	2480406	2480780	247	2480652	C	T	CTC->L	TTC->F	non-synonymous	hypothetical protein
Mb2254c	2482620	2481883	716	2481905	T	C	CAG->Q	CGG->R	non-synonymous	hypothetical protein
Mb2256c	2484847	2483753	615	2484233	G	A	GCC->A	GCT->A	synonymous	hypothetical protein
Mb2260c	2488523	2487582	14	2488510	A	G	ATC->I	ACC->T	non-synonymous	cobalamin biosynthesis protein
Mb2261	2488637	2489404	156	2488792	A	G	GGA->G	GGG->G	synonymous	hypothetical protein
Mb2264c	2491635	2490838	776	2490860	T	G	AAA->K	ACA->T	non-synonymous	hypothetical protein
Mb2265	2491687	2494392	925	2492611	C	G	CGT->R	GGT->G	non-synonymous	pyruvate dehydrogenase subunit E1
Mb2266	2494452	2495696	336	2494787	T	G	GTT->V	GTG->V	synonymous	hypothetical protein
Mb2269	2497263	2498513	18	2497280	T	C	ACT->T	ACC->T	synonymous	3-oxoacyl-ACP synthase
Mb2271	2499891	2501312	686	2500576	A	G	GAC->D	GGC->G	non-synonymous	acetyl-/propionyl-CoA carboxylase subunit beta
Mb2272	2501420	2502235	369	2501788	A	C	GAA->E	GAC->D	non-synonymous	hypothetical protein
Mb2272	2501420	2502235	596	2502015	T	G	GTC->V	GGC->G	non-synonymous	hypothetical protein
Mb2274c	2504417	2503848	203	2504215	G	T	GCC->A	GAC->D	non-synonymous	transcriptional regulator
Mb2278c	2508037	2507582	203	2507835	A	G	GTG->V	GCG->A	non-synonymous	hypothetical protein
Mb2280c	2508936	2508403	77	2508860	C	G	GGC->G	GCC->A	non-synonymous	hypothetical protein
Mb2281c	2509884	2509066	495	2509390	C	A	CGG->R	CGT->R	synonymous	hypothetical protein
Mb2284	2512286	2512921	48	2512333	T	C	GAT->D	GAC->D	synonymous	hypothetical protein
Mb2284	2512286	2512921	440	2512725	G	A	AGC->S	AAC->N	non-synonymous	hypothetical protein
Mb2287c	2517304	2515526	1752	2515553	C	T	GGG->G	GGA->G	synonymous	hypothetical protein
Mb2287c	2517304	2515526	1459	2515846	T	C	ACC->T	GCC->A	non-synonymous	hypothetical protein
Mb2287c	2517304	2515526	1140	2516165	C	G	CCG->P	CCC->P	synonymous	hypothetical protein
Mb2288	2517654	2518883	921	2518574	A	G	GTA->V	GTG->V	synonymous	hypothetical protein
Mb2291c	2523230	2521761	882	2522349	T	C	GAA->E	GAG->E	synonymous	cytochrome P450 128
Mb2293	2523652	2524179	455	2524106	T	C	CTC->L	CCC->P	non-synonymous	lipoprotein LppN
Mb2295	2524691	2525059	312	2525002	G	C	CTG->L	CTC->L	synonymous	hypothetical protein
Mb2297c	2525759	2525442	122	2525638	C	A	GGT->G	GTT->V	non-synonymous	hypothetical protein
Mb2297c	2525759	2525442	99	2525661	C	T	ATG->M	ATA->I	non-synonymous	hypothetical protein
Mb2299	2526703	2527893	952	2527654	C	T	CAC->H	TAC->Y	non-synonymous	cytochrome P450 121 CYP121
Mb2300c	2528977	2528078	431	2528547	G	A	CCC->P	CTC->L	non-synonymous	glycerolphosphodiesterase
Mb2301	2529156	2530535	17	2529172	C	G	GCT->A	GGT->G	non-synonymous	dehydrogenase
Mb2301	2529156	2530535	18	2529173	T	C	GCT->A	GCC->A	synonymous	dehydrogenase
Mb2308c	2537165	2536764	400	2536766	A	G	TAA->*	CAA->Q	non-synonymous	hypothetical protein
Mb2312	2540195	2540350	46	2540240	G	T	GCG->A	TCG->S	non-synonymous	lipoprotein lppOa
Mb2313	2540344	2540709	35	2540378	C	T	GCG->A	GTG->V	non-synonymous	lipoprotein lppOb
Mb2314	2540851	2541621	701	2541551	C	A	GCG->A	GAG->E	non-synonymous	thiosulfate sulfurtransferase
Mb2322c	2550603	2549671	549	2550055	A	G	CAT->H	CAC->H	synonymous	hypothetical protein
Mb2327	2553404	2554693	443	2553846	A	G	GAC->D	GGC->G	non-synonymous	hypothetical protein
Mb2328	2554703	2555296	139	2554841	G	A	GTC->V	ATC->I	non-synonymous	hypothetical protein
Mb2330c	2556291	2555446	703	2555589	A	G	TGG->W	CGG->R	non-synonymous	hypothetical protein
Mb2334	2558014	2558730	128	2558141	T	G	GTC->V	GGC->G	non-synonymous	hypothetical protein
Mb2334	2558014	2558730	634	2558647	G	A	GAC->D	AAC->N	non-synonymous	hypothetical protein
Mb2334	2558014	2558730	691	2558704	A	C	AGG->R	CGG->R	synonymous	hypothetical protein
Mb2336	2560640	2560927	157	2560796	A	G	AAA->K	GAA->E	non-synonymous	hypothetical protein
Mb2341c	2564885	2563512	1215	2563671	C	G	CGG->R	CGC->R	synonymous	hypothetical protein
Mb2343	2566433	2567305	199	2566631	G	C	GAC->D	CAC->H	non-synonymous	sugar-transport integral membrane protein ABC transporter UspA
Mb2345	2568113	2569435	967	2569079	G	A	GGT->G	AGT->S	non-synonymous	periplasmic sugar-binding lipoprotein UspC
Mb2345	2568113	2569435	1060	2569172	G	C	GTG->V	CTG->L	non-synonymous	periplasmic sugar-binding lipoprotein UspC
Mb2346c	2570321	2569443	417	2569905	G	A	ATC->I	ATT->I	synonymous	hypothetical protein
Mb2350c	2573864	2572956	337	2573528	T	C	ACG->T	GCG->A	non-synonymous	hypothetical protein
Mb2354	2577583	2578074	273	2577855	A	G	CGA->R	CGG->R	synonymous	hypothetical protein
Mb2355	2578326	2579474	846	2579171	T	G	AGT->S	AGG->R	non-synonymous	PE family protein
Mb2355	2578326	2579474	1030	2579355	G	A	GCC->A	ACC->T	non-synonymous	PE family protein
Mb2356c	2581056	2579509	1278	2579779	C	G	GCG->A	GCC->A	synonymous	nitrite extrusion protein 1 NarK1
Mb2359	2582335	2582673	136	2582470	C	A	CTT->L	ATT->I	non-synonymous	hypothetical protein
Mb2360	2582703	2584349	186	2582888	T	G	GAT->D	GAG->E	non-synonymous	malate dehydrogenase
Mb2360	2582703	2584349	985	2583687	C	A	CTC->L	ATC->I	non-synonymous	malate dehydrogenase
Mb2361c	2585917	2584346	1509	2584409	T	G	CAA->Q	CAC->H	non-synonymous	integral membrane transport protein
Mb2364	2588433	2589401	747	2589179	T	C	CAT->H	CAC->H	synonymous	hypothetical protein
Mb2365c	2590583	2589465	732	2589852	G	T	CTC->L	CTA->L	synonymous	hypothetical protein
Mb2365c	2590583	2589465	688	2589896	T	G	AGG->R	CGG->R	synonymous	hypothetical protein
Mb2367	2592290	2594770	131	2592420	T	C	GTC->V	GCC->A	non-synonymous	transmembrane transport protein MmpL9A
Mb2367	2592290	2594770	2481	2594770	A	G	TGA->*	TGG->W	non-synonymous	transmembrane transport protein MmpL9A
Mb2375c	2603667	2603485	67	2603601	G	A	CTG->L	TTG->L	synonymous	ESAT-6 like protein 6
Mb2375c	2603667	2603485	60	2603608	G	A	ATC->I	ATT->I	synonymous	ESAT-6 like protein 6
Mb2375c	2603667	2603485	53	2603615	T	C	GAG->E	GGG->G	non-synonymous	ESAT-6 like protein 6
Mb2380	2609721	2610113	191	2609911	G	A	CGC->R	CAC->H	non-synonymous	ferric uptake regulation protein FURB
Mb2382c	2611539	2610649	360	2611180	A	G	TTT->F	TTC->F	synonymous	undecaprenyl pyrophosphate synthase
Mb2385c	2614744	2613842	132	2614613	A	G	GCT->A	GCC->A	synonymous	GTP-binding protein Era
Mb2387c	2616438	2615131	463	2615976	G	A	CGC->R	TGC->C	non-synonymous	transmembrane protein
Mb2400c	2630156	2625771	3410	2626747	A	G	GTG->V	GCG->A	non-synonymous	peptide synthetase mbtF
Mb2400c	2630156	2625771	2544	2627613	C	T	GGG->G	GGA->G	synonymous	peptide synthetase mbtF
Mb2401c	2635186	2630138	3321	2631866	G	A	GCC->A	GCT->A	synonymous	peptide synthetase mbtE
Mb2404c	2643908	2639664	2020	2641889	C	G	GTG->V	CTG->L	non-synonymous	phenyloxazoline synthase
Mb2404c	2643908	2639664	788	2643121	T	C	CAG->Q	CGG->R	non-synonymous	phenyloxazoline synthase
Mb2409c	2651213	2650086	550	2650664	T	C	ACG->T	GCG->A	non-synonymous	coproporphyrinogen III oxidase
Mb2411c	2652337	2651780	98	2652240	G	A	ACT->T	ATT->I	non-synonymous	hypothetical protein
Mb2415	2656081	2658012	717	2656797	C	T	GCC->A	GCT->A	synonymous	gamma-glutamyltranspeptidase
Mb2415	2656081	2658012	1184	2657264	A	G	CAG->Q	CGG->R	non-synonymous	gamma-glutamyltranspeptidase
Mb2417	2658597	2660147	1189	2659785	C	T	CCG->P	TCG->S	non-synonymous	hypothetical protein
Mb2418	2660871	2661953	77	2660947	A	G	AAC->N	AGC->S	non-synonymous	PE-PGRS family protein
Mb2418	2660871	2661953	288	2661158	C	T	CCC->P	CCT->P	synonymous	PE-PGRS family protein
Mb2418	2660871	2661953	576	2661446	C	T	GCC->A	GCT->A	synonymous	PE-PGRS family protein
Mb2418	2660871	2661953	971	2661841	G	A	AGC->S	AAC->N	non-synonymous	PE-PGRS family protein
Mb2420c	2663868	2663050	791	2663078	T	C	CAC->H	CGC->R	non-synonymous	sulfate-transport integral membrane protein ABC transporter CysW
Mb2422c	2665783	2664713	226	2665558	C	T	GCG->A	ACG->T	non-synonymous	sulfate-binding lipoprotein
Mb2426c	2669359	2668604	379	2668981	G	C	CTC->L	GTC->V	non-synonymous	lipoprotein LppR
Mb2427c	2671317	2669356	231	2671087	T	G	GGA->G	GGC->G	synonymous	GTP-binding protein LepA
Mb2428	2671338	2671907	561	2671898	T	C	GCT->A	GCC->A	synonymous	hypothetical protein
Mb2431	2674201	2674920	647	2674847	G	T	GGT->G	GTT->V	non-synonymous	PE family-like protein
Mb2432c	2675517	2674678	671	2674847	G	T	ACC->T	AAC->N	non-synonymous	hypothetical protein
Mb2434c	2678149	2676494	171	2677979	G	A	GCC->A	GCT->A	synonymous	hypothetical protein
Mb2437c	2681061	2679490	1155	2679907	T	G	CCA->P	CCC->P	synonymous	hypothetical protein
Mb2438c	2681969	2681076	872	2681098	A	C	CTG->L	CGG->R	non-synonymous	hypothetical protein
Mb2439c	2683535	2682309	505	2683031	C	T	GTC->V	ATC->I	non-synonymous	hypothetical protein
Mb2439c	2683535	2682309	226	2683310	C	T	GCG->A	ACG->T	non-synonymous	hypothetical protein
Mb2441c	2685323	2684580	333	2684991	C	T	CGG->R	CGA->R	synonymous	hypothetical protein
Mb2442c	2685984	2685313	494	2685491	A	G	GTG->V	GCG->A	non-synonymous	phosphoglycerate mutase
Mb2444c	2686993	2686358	538	2686456	T	C	AGC->S	GGC->G	non-synonymous	nicotinic acid mononucleotide adenylyltransferase
Mb2447c	2689653	2688961	574	2689080	A	G	TAC->Y	CAC->H	non-synonymous	transposase
Mb2450c	2692366	2691491	337	2692030	G	A	CTC->L	TTC->F	non-synonymous	hypothetical protein
Mb2459c	2697297	2697007	77	2697221	A	C	CTG->L	CGG->R	non-synonymous	hypothetical protein
Mb2462	2701393	2702307	821	2702213	T	C	GTG->V	GCG->A	non-synonymous	ribokinase RBSK
Mb2467c	2707849	2706410	1413	2706437	A	C	AGT->S	AGG->R	non-synonymous	GTPase ObgE
Mb2470	2708872	2710347	501	2709372	G	A	CTG->L	CTA->L	synonymous	C4-dicarboxylate-transport transmembrane protein DctA
Mb2470	2708872	2710347	1050	2709921	T	G	CTT->L	CTG->L	synonymous	C4-dicarboxylate-transport transmembrane protein DctA
Mb2476c	2719735	2718476	273	2719463	A	G	ACT->T	ACC->T	synonymous	hypothetical protein
Mb2477c	2720343	2719825	59	2720285	G	C	ACG->T	AGG->R	non-synonymous	resuscitation-promoting factor RpfE
Mb2478	2720425	2720823	187	2720611	G	A	GAC->D	AAC->N	non-synonymous	hypothetical protein
Mb2485	2727942	2728850	369	2728310	T	C	CGT->R	CGC->R	synonymous	homocysteine methyltransferase
Mb2486	2729017	2730543	165	2729181	A	G	ATA->I	ATG->M	non-synonymous	integral membrane transport protein
Mb2489c	2733454	2732054	353	2733102	A	G	CTC->L	CCC->P	non-synonymous	trigger factor
Mb2489c	2733454	2732054	93	2733362	G	A	GCC->A	GCT->A	synonymous	trigger factor
Mb2492c	2736322	2735834	318	2736005	C	T	CAG->Q	CAA->Q	synonymous	ribose-5-phosphate isomerase B
Mb2496c	2741198	2740530	295	2740904	A	C	TCG->S	GCG->A	non-synonymous	hypothetical protein
Mb2496c	2741198	2740530	82	2741117	C	T	GGT->G	AGT->S	non-synonymous	hypothetical protein
Mb2498	2741727	2743367	617	2742343	C	G	TCG->S	TGG->W	non-synonymous	alpha-glucosidase
Mb2498	2741727	2743367	992	2742718	T	C	GTG->V	GCG->A	non-synonymous	alpha-glucosidase
Mb2498	2741727	2743367	1621	2743347	G	A	GCC->A	ACC->T	non-synonymous	alpha-glucosidase
Mb2499	2743435	2743728	90	2743524	C	T	CGC->R	CGT->R	synonymous	hypothetical protein
Mb2501c	2745132	2744479	89	2745044	A	G	GTC->V	GCC->A	non-synonymous	hypothetical protein
Mb2503c	2750422	2745551	1845	2748578	G	A	GCC->A	GCT->A	synonymous	NAD-dependent glutamate dehydrogenase
Mb2504c	2752202	2750526	1116	2751087	C	T	ACG->T	ACA->T	synonymous	ABC transporter ATP-binding protein
Mb2507c	2756085	2753716	1736	2754350	C	T	AGC->S	AAC->N	non-synonymous	glycerol-3-phosphate acyltransferase
Mb2508c	2757824	2756082	1225	2756600	G	T	CGG->R	AGG->R	synonymous	bifunctional L-3-phosphoserine phosphatase/1-acyl-SN-glycerol-3-phosphate acyltransferase
Mb2508c	2757824	2756082	565	2757260	C	A	GGT->G	TGT->C	non-synonymous	bifunctional L-3-phosphoserine phosphatase/1-acyl-SN-glycerol-3-phosphate acyltransferase
Mb2509c	2759296	2757821	1020	2758277	G	A	GCC->A	GCT->A	synonymous	hypothetical protein
Mb2510c	2760790	2759525	179	2760612	C	A	CGC->R	CTC->L	non-synonymous	carboxylesterase LipQ
Mb2515c	2767681	2764268	3202	2764480	C	T	GGC->G	AGC->S	non-synonymous	LuxR family transcriptional regulator
Mb2515c	2767681	2764268	794	2766888	G	A	ACC->T	ATC->I	non-synonymous	LuxR family transcriptional regulator
Mb2517c	2771507	2768055	2669	2768839	C	T	GGC->G	GAC->D	non-synonymous	hypothetical protein
Mb2517c	2771507	2768055	1551	2769957	G	A	GGC->G	GGT->G	synonymous	hypothetical protein
Mb2517c	2771507	2768055	1227	2770281	C	T	GCG->A	GCA->A	synonymous	hypothetical protein
Mb2518c	2773033	2771504	1410	2771624	A	G	CAT->H	CAC->H	synonymous	hypothetical protein
Mb2522	2775107	2775532	143	2775249	T	C	GTG->V	GCG->A	non-synonymous	hypothetical protein
Mb2523c	2776736	2775555	622	2776115	A	G	TGG->W	CGG->R	non-synonymous	branched-chain alpha-keto acid dehydrogenase E2 subunit
Mb2523c	2776736	2775555	307	2776430	A	C	TAC->Y	GAC->D	non-synonymous	branched-chain alpha-keto acid dehydrogenase E2 subunit
Mb2524c	2777779	2776733	601	2777179	T	C	AGC->S	GGC->G	non-synonymous	pyruvate dehydrogenase E1 component subunit beta PdhB
Mb2526c	2779973	2779152	435	2779539	G	A	GGC->G	GGT->G	synonymous	citrate (Pro-3S)-lyase subunit beta
Mb2530c	2785271	2783682	1029	2784243	T	G	TTA->L	TTC->F	non-synonymous	acetyl-/propionyl-CoA carboxylase subunit beta
Mb2530c	2785271	2783682	973	2784299	A	C	TTT->F	GTT->V	non-synonymous	acetyl-/propionyl-CoA carboxylase subunit beta
Mb2530c	2785271	2783682	229	2785043	T	C	AGC->S	GGC->G	non-synonymous	acetyl-/propionyl-CoA carboxylase subunit beta
Mb2535	2789235	2790056	537	2789771	T	C	CCT->P	CCC->P	synonymous	hypothetical protein
Mb2538c	2793886	2792285	1509	2792378	T	G	ATA->I	ATC->I	synonymous	hypothetical protein
Mb2540c	2796600	2795353	510	2796091	C	T	GTG->V	GTA->V	synonymous	IS1081 transposase
Mb2540c	2796600	2795353	25	2796576	T	C	ACC->T	GCC->A	non-synonymous	IS1081 transposase
Mb2544c	2799388	2798141	1110	2798279	G	A	GGC->G	GGT->G	synonymous	hypothetical protein
Mb2545c	2800310	2799507	185	2800126	G	A	GCT->A	GTT->V	non-synonymous	hypothetical protein
Mb2548	2802582	2804060	200	2802781	T	C	GTG->V	GCG->A	non-synonymous	PE family protein
Mb2548	2802582	2804060	518	2803099	C	G	GCC->A	GGC->G	non-synonymous	PE family protein
Mb2548	2802582	2804060	519	2803100	C	G	GCC->A	GCG->A	synonymous	PE family protein
Mb2550	2804481	2804954	364	2804844	A	G	ATG->M	GTG->V	non-synonymous	bacterioferritin comigratory protein BCP
Mb2555	2817888	2818115	77	2817964	T	C	TTG->L	TCG->S	non-synonymous	hypothetical protein
Mb2555	2817888	2818115	201	2818088	A	G	GTA->V	GTG->V	synonymous	hypothetical protein
Mb2557c	2819468	2818548	775	2818694	G	C	CAG->Q	GAG->E	non-synonymous	restriction system protein mrr
Mb2558	2819672	2821063	281	2819952	A	G	GAG->E	GGG->G	non-synonymous	hypothetical protein
Mb2560c	2824578	2821735	147	2824432	A	G	GAT->D	GAC->D	synonymous	amino acid decarboxylase
Mb2562c	2825521	2825051	56	2825466	T	G	GAC->D	GCC->A	non-synonymous	transcription antitermination protein NusB
Mb2573	2833921	2834580	22	2833942	C	T	CCC->P	TCC->S	non-synonymous	lipoprotein LprR
Mb2573	2833921	2834580	36	2833956	A	G	CCA->P	CCG->P	synonymous	lipoprotein LprR
Mb2573	2833921	2834580	84	2834004	G	C	GCG->A	GCC->A	synonymous	lipoprotein LprR
Mb2574	2834577	2835239	633	2835209	T	C	ATT->I	ATC->I	synonymous	lipoprotein LppB
Mb2585c	2843937	2841223	678	2843260	G	C	AAC->N	AAG->K	non-synonymous	alanyl-tRNA synthetase
Mb2589c	2847381	2846023	950	2846432	T	C	GAC->D	GGC->G	non-synonymous	recombination factor protein RarA
Mb2591	2848861	2849598	557	2849417	C	T	ACC->T	ATC->I	non-synonymous	hypothetical protein
Mb2591	2848861	2849598	565	2849425	G	A	GCC->A	ACC->T	non-synonymous	hypothetical protein
Mb2593	2850793	2851785	727	2851519	A	C	ATG->M	CTG->L	non-synonymous	glutamine-transport ATP-binding protein ABC transporter GlnQ
Mb2595	2853824	2855425	28	2853851	A	G	AGC->S	GGC->G	non-synonymous	hypothetical protein
Mb2595	2853824	2855425	808	2854631	T	G	TCC->S	GCC->A	non-synonymous	hypothetical protein
Mb2597	2857244	2859898	874	2858117	T	C	TTG->L	CTG->L	synonymous	hypothetical protein
Mb2597	2857244	2859898	1585	2858828	A	C	ACC->T	CCC->P	non-synonymous	hypothetical protein
Mb2602c	2865251	2863416	1544	2863708	A	G	GTG->V	GCG->A	non-synonymous	aspartyl-tRNA synthetase
Mb2603	2865404	2866231	567	2865970	T	C	TAT->Y	TAC->Y	synonymous	2-dehydropantoate 2-reductase
Mb2603	2865404	2866231	810	2866213	T	C	GCT->A	GCC->A	synonymous	2-dehydropantoate 2-reductase
Mb2607	2868366	2868617	251	2868616	A	G	TAG->*	TGG->W	non-synonymous	hypothetical protein
Mb2609c	2870979	2869957	93	2870887	G	A	AGC->S	AGT->S	synonymous	hypothetical protein
Mb2610	2871087	2871989	286	2871372	A	G	ACG->T	GCG->A	non-synonymous	haloalkane dehalogenase
Mb2610	2871087	2871989	878	2871964	A	G	CAG->Q	CGG->R	non-synonymous	haloalkane dehalogenase
Mb2613	2874262	2875188	196	2874457	T	G	TTC->F	GTC->V	non-synonymous	peptidyl-prolyl cis-trans isomerase B
Mb2616c	2880125	2878452	162	2879964	A	G	ACT->T	ACC->T	synonymous	lipoprotein
Mb2617c	2881459	2880131	1300	2880160	G	T	CCC->P	ACC->T	non-synonymous	preprotein translocase subunit SecF
Mb2617c	2881459	2880131	925	2880535	T	C	ACG->T	GCG->A	non-synonymous	preprotein translocase subunit SecF
Mb2618c	2883184	2881463	1478	2881707	C	T	AGC->S	AAC->N	non-synonymous	preprotein translocase subunit SecD
Mb2619c	2883641	2883294	329	2883313	C	G	CGG->R	CCG->P	non-synonymous	preprotein translocase subunit YajC
Mb2621	2885319	2888825	926	2886244	A	T	TAC->Y	TTC->F	non-synonymous	fatty-acid--CoA ligase
Mb2621	2885319	2888825	1800	2887118	A	G	CTA->L	CTG->L	synonymous	fatty-acid--CoA ligase
Mb2621	2885319	2888825	2480	2887798	T	C	GTG->V	GCG->A	non-synonymous	fatty-acid--CoA ligase
Mb2621	2885319	2888825	3316	2888634	A	G	ACC->T	GCC->A	non-synonymous	fatty-acid--CoA ligase
Mb2622	2888999	2890639	1243	2890241	A	G	AGC->S	GGC->G	non-synonymous	PE-PGRS family protein
Mb2622	2888999	2890639	1296	2890294	C	T	GGC->G	GGT->G	synonymous	PE-PGRS family protein
Mb2622	2888999	2890639	1298	2890296	A	T	CAG->Q	CTG->L	non-synonymous	PE-PGRS family protein
Mb2622	2888999	2890639	1388	2890386	A	G	GAC->D	GGC->G	non-synonymous	PE-PGRS family protein
Mb2622	2888999	2890639	1434	2890432	C	T	GGC->G	GGT->G	synonymous	PE-PGRS family protein
Mb2629	2894443	2894937	306	2894748	A	G	GCA->A	GCG->A	synonymous	hypothetical protein
Mb2630	2894934	2895365	35	2894968	T	G	ATC->I	AGC->S	non-synonymous	hypothetical protein
Mb2632	2895845	2897416	270	2896114	A	G	CTA->L	CTG->L	synonymous	spermidine synthase
Mb2637c	2900599	2899754	253	2900347	G	A	CTC->L	TTC->F	non-synonymous	acyl-CoA thioesterase
Mb2640	2902503	2904245	841	2903343	T	C	TCG->S	CCG->P	non-synonymous	PPE family protein
Mb2647	2910833	2911060	170	2911002	A	G	CAC->H	CGC->R	non-synonymous	hypothetical protein
Mb2648c	2912451	2911057	471	2911981	A	C	GGT->G	GGG->G	synonymous	PE-PGRS family protein
Mb2648c	2912451	2911057	462	2911990	C	G	GGG->G	GGC->G	synonymous	PE-PGRS family protein
Mb2648c	2912451	2911057	430	2912022	T	C	AGC->S	GGC->G	non-synonymous	PE-PGRS family protein
Mb2648c	2912451	2911057	213	2912239	A	G	TAT->Y	TAC->Y	synonymous	PE-PGRS family protein
Mb2648c	2912451	2911057	153	2912299	C	G	GCG->A	GCC->A	synonymous	PE-PGRS family protein
Mb2648c	2912451	2911057	119	2912333	A	G	GTC->V	GCC->A	non-synonymous	PE-PGRS family protein
Mb2648c	2912451	2911057	54	2912398	C	T	GCG->A	GCA->A	synonymous	PE-PGRS family protein
Mb2649	2912796	2913296	214	2913009	A	G	ATC->I	GTC->V	non-synonymous	hypothetical protein
Mb2654c	2916021	2915350	329	2915693	G	A	GCC->A	GTC->V	non-synonymous	transcriptional regulator
Mb2659c	2920456	2920025	93	2920364	A	G	CAT->H	CAC->H	synonymous	hypothetical protein
Mb2661	2922521	2922883	176	2922696	T	C	TTG->L	TCG->S	non-synonymous	hypothetical protein
Mb2661	2922521	2922883	203	2922723	G	C	CGT->R	CCT->P	non-synonymous	hypothetical protein
Mb2662	2923230	2924354	191	2923420	A	C	GAT->D	GCT->A	non-synonymous	hypothetical protein
Mb2663	2924356	2924895	90	2924445	C	T	CGC->R	CGT->R	synonymous	hypothetical protein
Mb2667c	2929903	2927567	837	2929067	G	C	GGC->G	GGG->G	synonymous	PE-PGRS family protein
Mb2676	2934372	2935868	1364	2935735	C	T	GCC->A	GTC->V	non-synonymous	arsenic-transport integral membrane protein ArsC
Mb2681	2938333	2938566	183	2938515	A	G	CGA->R	CGG->R	synonymous	hypothetical protein
Mb2685	2939550	2940353	25	2939574	A	G	ACC->T	GCC->A	non-synonymous	truncated IS1081 transposase
Mb2685	2939550	2940353	510	2940059	G	A	GTG->V	GTA->V	synonymous	truncated IS1081 transposase
Mb2685	2939550	2940353	803	2940352	A	G	TAA->*	TGA->*	synonymous	truncated IS1081 transposase
Mb2687	2941212	2941733	200	2941411	C	G	GCC->A	GGC->G	non-synonymous	hypothetical protein
Mb2687	2941212	2941733	484	2941695	A	G	AAG->K	GAG->E	non-synonymous	hypothetical protein
Mb2694c	2948470	2947718	243	2948228	G	C	TCC->S	TCG->S	synonymous	hypothetical protein
Mb2697c	2951596	2950523	806	2950791	C	G	GGC->G	GCC->A	non-synonymous	uroporphyrinogen decarboxylase
Mb2700	2953375	2954691	587	2953961	T	C	GTG->V	GCG->A	non-synonymous	hypothetical protein
Mb2702	2956748	2957245	251	2956998	C	T	TCA->S	TTA->L	non-synonymous	hypothetical protein
Mb2704	2958619	2959905	1177	2959795	T	G	TGC->C	GGC->G	non-synonymous	arsenic-transport integral membrane protein ArsB1
Mb2708c	2963698	2962481	517	2963182	C	A	GTA->V	TTA->L	non-synonymous	hypothetical protein
Mb2708c	2963698	2962481	165	2963534	A	G	TAT->Y	TAC->Y	synonymous	hypothetical protein
Mb2709c	2965845	2963854	1972	2963874	G	A	CGA->R	TGA->*	non-synonymous	hypothetical protein
Mb2710	2965980	2966663	491	2966470	A	G	GAT->D	GGT->G	non-synonymous	TRK system potassium uptake protein CEOB
Mb2712c	2968004	2967333	376	2967629	C	T	GGG->G	AGG->R	non-synonymous	hypothetical protein
Mb2713c	2968403	2968035	202	2968202	T	G	AGC->S	CGC->R	non-synonymous	hypothetical protein
Mb2715c	2970244	2969465	490	2969755	T	C	AAC->N	GAC->D	non-synonymous	hypothetical protein
Mb2728	2978475	2978921	104	2978578	G	C	AGT->S	ACT->T	non-synonymous	transmembrane protein
Mb2729	2979097	2980068	72	2979168	A	G	GCA->A	GCG->A	synonymous	RNA polymerase sigma factor SigB
Mb2729	2979097	2980068	648	2979744	T	G	GTT->V	GTG->V	synonymous	RNA polymerase sigma factor SigB
Mb2730	2980201	2980893	457	2980657	C	A	CGG->R	AGG->R	synonymous	IRON-dependent repressor and activator IDER
Mb2731c	2981964	2980906	986	2980979	G	A	ACC->T	ATC->I	non-synonymous	hypothetical protein
Mb2733	2983701	2984675	542	2984242	G	C	TGG->W	TCG->S	non-synonymous	hypothetical protein
Mb2733	2983701	2984675	891	2984591	A	G	CTA->L	CTG->L	synonymous	hypothetical protein
Mb2734	2984734	2985759	787	2985520	C	T	CCG->P	TCG->S	non-synonymous	hydrolase
Mb2739	2988481	2989134	293	2988773	C	T	GCC->A	GTC->V	non-synonymous	LexA repressor
Mb2740c	2991255	2989156	1431	2989825	G	A	CCC->P	CCT->P	synonymous	hypothetical protein
Mb2743c	2993927	2992767	466	2993462	C	T	GTG->V	ATG->M	non-synonymous	acyl-CoA dehydrogenase
Mb2743c	2993927	2992767	380	2993548	G	A	ACC->T	ATC->I	non-synonymous	acyl-CoA dehydrogenase
Mb2743c	2993927	2992767	97	2993831	C	G	GCC->A	CCC->P	non-synonymous	acyl-CoA dehydrogenase
Mb2748c	2999111	2998206	797	2998315	A	G	GTG->V	GCG->A	non-synonymous	hypothetical protein
Mb2748c	2999111	2998206	123	2998989	C	G	TTG->L	TTC->F	non-synonymous	hypothetical protein
Mb2751c	3001625	3001011	126	3001500	T	C	GTA->V	GTG->V	synonymous	transmembrane protein
Mb2755c	3005722	3005198	175	3005548	C	G	GTT->V	CTT->L	non-synonymous	recombination regulator RecX
Mb2761	3010528	3012042	1086	3011613	A	C	GGA->G	GGC->G	synonymous	PE-PGRS family protein
Mb2761	3010528	3012042	1112	3011639	A	G	GAC->D	GGC->G	non-synonymous	PE-PGRS family protein
Mb2763c	3012922	3012335	427	3012496	G	A	CTG->L	TTG->L	synonymous	hypothetical protein
Mb2763c	3012922	3012335	213	3012710	G	A	ACC->T	ACT->T	synonymous	hypothetical protein
Mb2765c	3014637	3013825	457	3014181	G	T	CAG->Q	AAG->K	non-synonymous	hypothetical protein
Mb2768	3015836	3016360	9	3015844	G	A	GAG->E	GAA->E	synonymous	N-acetylglutamate synthase
Mb2777c	3026657	3025035	279	3026379	C	G	GTG->V	GTC->V	synonymous	type I restriction/modification system DNA methylase HsdM
Mb2784c	3029630	3029499	130	3029501	A	G	TAG->*	CAG->Q	non-synonymous	hypothetical protein
Mb2790c	3034652	3033468	788	3033865	C	G	CGC->R	CCC->P	non-synonymous	PPE family protein
Mb2791c	3035559	3034732	407	3035153	G	A	GCC->A	GTC->V	non-synonymous	PE family protein
Mb2791c	3035559	3034732	160	3035400	A	G	TCG->S	CCG->P	non-synonymous	PE family protein
Mb2792c	3037031	3035883	624	3036408	A	G	GCT->A	GCC->A	synonymous	PPE family protein
Mb2795c	3038915	3038178	611	3038305	A	G	ATT->I	ACT->T	non-synonymous	dihydrodipicolinate reductase
Mb2795c	3038915	3038178	414	3038502	T	G	GAA->E	GAC->D	non-synonymous	dihydrodipicolinate reductase
Mb2801c	3043304	3042789	27	3043278	T	C	ATA->I	ATG->M	non-synonymous	LRP/AsnC family transcriptional regulator
Mb2804c	3045533	3044499	360	3045174	G	A	GTC->V	GTT->V	synonymous	oxidoreductase
Mb2811	3053508	3054194	410	3053917	C	A	GCC->A	GAC->D	non-synonymous	transcriptional repressor SIRR
Mb2812c	3055487	3054255	828	3054660	A	G	GGT->G	GGC->G	synonymous	acyl-CoA dehydrogenase
Mb2815c	3058711	3058130	238	3058474	C	T	GCC->A	ACC->T	non-synonymous	resolvase
Mb2815c	3058711	3058130	50	3058662	A	G	GTG->V	GCG->A	non-synonymous	resolvase
Mb2819c	3062168	3061605	476	3061693	A	C	TTC->F	TGC->C	non-synonymous	lipoprotein LppV
Mb2820c	3063856	3062168	228	3063629	A	G	GCT->A	GCC->A	synonymous	hypothetical protein
Mb2823	3064968	3066617	1263	3066230	C	T	GAC->D	GAT->D	synonymous	hydrolase
Mb2825c	3068375	3067332	348	3068028	C	T	TCG->S	TCA->S	synonymous	hypothetical protein
Mb2827c	3069646	3069017	172	3069475	T	C	ACC->T	GCC->A	non-synonymous	hypothetical protein
Mb2828	3069419	3069823	57	3069475	T	C	GGT->G	GGC->G	synonymous	hypothetical protein
Mb2832	3071960	3072271	136	3072095	C	A	CCG->P	ACG->T	non-synonymous	hypothetical protein
Mb2837	3074774	3075586	226	3074999	G	A	GTC->V	ATC->I	non-synonymous	hypothetical protein
Mb2844c	3084834	3083926	342	3084493	T	A	AAA->K	AAT->N	non-synonymous	hypothetical protein
Mb2848c	3089285	3088341	167	3089119	G	T	CCC->P	CAC->H	non-synonymous	hypothetical protein
Mb2849c	3090110	3089463	584	3089527	T	G	GAG->E	GCG->A	non-synonymous	hypothetical protein
Mb2849c	3090110	3089463	577	3089534	G	A	CTG->L	TTG->L	synonymous	hypothetical protein
Mb2849c	3090110	3089463	575	3089536	T	G	CAG->Q	CCG->P	non-synonymous	hypothetical protein
Mb2849c	3090110	3089463	574	3089537	G	T	CAG->Q	AAG->K	non-synonymous	hypothetical protein
Mb2849c	3090110	3089463	565	3089546	G	C	CTG->L	GTG->V	non-synonymous	hypothetical protein
Mb2851c	3092054	3091167	645	3091410	A	G	CGT->R	CGC->R	synonymous	hypothetical protein
Mb2852c	3092904	3092359	438	3092467	G	A	GGC->G	GGT->G	synonymous	hypothetical protein
Mb2852c	3092904	3092359	422	3092483	G	C	ACG->T	AGG->R	non-synonymous	hypothetical protein
Mb2852c	3092904	3092359	384	3092521	C	G	TCG->S	TCC->S	synonymous	hypothetical protein
Mb2852c	3092904	3092359	383	3092522	G	C	TCG->S	TGG->W	non-synonymous	hypothetical protein
Mb2852c	3092904	3092359	173	3092732	G	T	GCG->A	GAG->E	non-synonymous	hypothetical protein
Mb2855	3093842	3094591	466	3094307	G	T	GAC->D	TAC->Y	non-synonymous	enoyl-CoA hydratase
Mb2855	3093842	3094591	679	3094520	T	C	TGC->C	CGC->R	non-synonymous	enoyl-CoA hydratase
Mb2857c	3097055	3095745	829	3096227	G	C	CCC->P	GCC->A	non-synonymous	sn-glycerol-3-phosphate-binding lipoprotein UGPB
Mb2857c	3097055	3095745	521	3096535	A	G	CTG->L	CCG->P	non-synonymous	sn-glycerol-3-phosphate-binding lipoprotein UGPB
Mb2857c	3097055	3095745	332	3096724	A	C	ATC->I	AGC->S	non-synonymous	sn-glycerol-3-phosphate-binding lipoprotein UGPB
Mb2861c	3100198	3098879	1257	3098942	T	C	CTA->L	CTG->L	synonymous	DNA-damage-inducible protein F
Mb2861c	3100198	3098879	1049	3099150	A	G	CTG->L	CCG->P	non-synonymous	DNA-damage-inducible protein F
Mb2862c	3101215	3100205	23	3101193	C	T	AGT->S	AAT->N	non-synonymous	hypothetical protein
Mb2863c	3101741	3101190	549	3101193	C	T	GAG->E	GAA->E	synonymous	ribosome-binding factor A
Mb2864c	3104443	3101741	921	3103523	C	T	GAG->E	GAA->E	synonymous	translation initiation factor IF-2
Mb2870c	3109520	3107772	694	3108827	T	C	ACG->T	GCG->A	non-synonymous	prolyl-tRNA synthetase
Mb2870c	3109520	3107772	530	3108991	C	T	CGC->R	CAC->H	non-synonymous	prolyl-tRNA synthetase
Mb2871c	3111201	3109609	45	3111157	C	T	AGG->R	AGA->R	synonymous	integral membrane efflux protein EfpA
Mb2871c	3111201	3109609	44	3111158	C	G	AGG->R	ACG->T	non-synonymous	integral membrane efflux protein EfpA
Mb2874c	3114660	3114037	360	3114301	G	C	TGC->C	TGG->W	non-synonymous	cob(I)yrinic acid a,c-diamide adenosyltransferase
Mb2875c	3116570	3114681	1336	3115235	T	C	AGT->S	GGT->G	non-synonymous	magnesium chelatase
Mb2875c	3116570	3114681	818	3115753	T	C	CAG->Q	CGG->R	non-synonymous	magnesium chelatase
Mb2878	3118784	3120631	537	3119320	C	A	AAC->N	AAA->K	non-synonymous	PE-PGRS family protein
Mb2879	3120668	3121708	639	3121306	T	C	GAT->D	GAC->D	synonymous	hypothetical protein
Mb2880	3121721	3123100	432	3122152	G	A	TCG->S	TCA->S	synonymous	mycothione reductase
Mb2883c	3127239	3125872	231	3127009	G	C	CCC->P	CCG->P	synonymous	aldehyde dehydrogenase
Mb2887c	3131159	3130575	53	3131107	G	C	CCC->P	CGC->R	non-synonymous	hypothetical protein
Mb2889c	3133781	3131970	723	3133059	A	G	ATT->I	ATC->I	synonymous	penicillin-binding lipoprotein
Mb2893c	3137047	3135884	1118	3135930	G	T	GCT->A	GAT->D	non-synonymous	4-hydroxy-3-methylbut-2-en-1-yl diphosphate synthase
Mb2901	3144179	3144493	130	3144308	C	T	CGG->R	TGG->W	non-synonymous	transmembrane protein
Mb2902c	3145387	3144524	103	3145285	G	A	CAT->H	TAT->Y	non-synonymous	hypothetical protein
Mb2904c	3147193	3146099	1014	3146180	C	T	AAG->K	AAA->K	synonymous	ribosomal RNA large subunit methyltransferase N
Mb2909c	3152064	3150745	1157	3150908	A	T	ATA->I	AAA->K	non-synonymous	transposase
Mb2910c	3152948	3152061	702	3152247	C	T	GTG->V	GTA->V	synonymous	resolvase
Mb2912c	3154801	3153380	714	3154088	C	T	TGG->W	TGA->*	non-synonymous	amidase
Mb2913c	3155623	3154808	776	3154848	A	G	ATG->M	ACG->T	non-synonymous	elongation factor Ts
Mb2915	3156782	3157531	17	3156798	C	T	GCG->A	GTG->V	non-synonymous	hypothetical protein
Mb2915	3156782	3157531	39	3156820	G	A	GTG->V	GTA->V	synonymous	hypothetical protein
Mb2920c	3162950	3161781	170	3162781	C	T	GGA->G	GAA->E	non-synonymous	hypothetical protein
Mb2921c	3164458	3162947	693	3163766	T	A	CTA->L	CTT->L	synonymous	hypothetical protein
Mb2923c	3165922	3165092	251	3165672	G	A	GCC->A	GTC->V	non-synonymous	formate dehydrogenase accessory protein
Mb2926c	3169472	3168678	317	3169156	T	C	CAC->H	CGC->R	non-synonymous	ribonuclease HII
Mb2927c	3170370	3169486	766	3169605	T	C	AAC->N	GAC->D	non-synonymous	signal peptidase I LepB
Mb2929	3171144	3172088	242	3171385	A	G	CAG->Q	CGG->R	non-synonymous	hypothetical protein
Mb2938c	3180040	3178283	222	3179819	T	C	GAA->E	GAG->E	synonymous	Ser/Thr protein kinase
Mb2942c	3187196	3184770	1480	3185717	A	G	TGG->W	CGG->R	non-synonymous	PII uridylyl-transferase
Mb2942c	3187196	3184770	668	3186529	C	A	CGG->R	CTG->L	non-synonymous	PII uridylyl-transferase
Mb2943c	3187592	3187254	213	3187380	A	G	GAT->D	GAC->D	synonymous	nitrogen regulatory protein P-II GLNB
Mb2944c	3189022	3187589	940	3188083	C	A	GGT->G	TGT->C	non-synonymous	ammonium transporter
Mb2946c	3194434	3190817	2092	3192343	C	G	GGC->G	CGC->R	non-synonymous	chromosome partition protein Smc
Mb2946c	3194434	3190817	1091	3193344	C	A	CGG->R	CTG->L	non-synonymous	chromosome partition protein Smc
Mb2955	3200270	3202021	718	3200987	G	A	GTG->V	ATG->M	non-synonymous	acyl-CoA synthetase
Mb2956	3202018	3207648	1103	3203120	C	A	ACC->T	AAC->N	non-synonymous	phenolpthiocerol synthesis type-I polyketide synthase PPSA
Mb2956	3202018	3207648	2135	3204152	A	G	CAG->Q	CGG->R	non-synonymous	phenolpthiocerol synthesis type-I polyketide synthase PPSA
Mb2956	3202018	3207648	3581	3205598	T	G	CTA->L	CGA->R	non-synonymous	phenolpthiocerol synthesis type-I polyketide synthase PPSA
Mb2957	3207645	3212261	3624	3211268	T	C	GCT->A	GCC->A	synonymous	phenolpthiocerol synthesis type-I polyketide synthase PPSB
Mb2957	3207645	3212261	3809	3211453	T	G	CTG->L	CGG->R	non-synonymous	phenolpthiocerol synthesis type-I polyketide synthase PPSB
Mb2958	3212258	3218824	5322	3217579	A	C	GGA->G	GGC->G	synonymous	phenolpthiocerol synthesis type-I polyketide synthase PPSC
Mb2959	3218821	3224304	381	3219201	A	G	ATA->I	ATG->M	non-synonymous	phenolpthiocerol synthesis type-I polyketide synthase PPSD
Mb2959	3218821	3224304	5468	3224288	C	A	GCA->A	GAA->E	non-synonymous	phenolpthiocerol synthesis type-I polyketide synthase PPSD
Mb2960	3224310	3228776	3301	3227610	G	A	GAC->D	AAC->N	non-synonymous	phenolpthiocerol synthesis type-I polyketide synthase PPSE
Mb2961	3228787	3229782	925	3229711	G	C	GAC->D	CAC->H	non-synonymous	daunorubicin-DIM-transport ATP-binding protein ABC transporter DrrA
Mb2962	3229779	3230648	654	3230432	T	C	CTT->L	CTC->L	synonymous	daunorubicin-DIM-transport integral membrane protein ABC transporter DrrB
Mb2965c	3239288	3232953	6013	3233276	T	G	ACT->T	CCT->P	non-synonymous	multifunctional mycocerosic acid synthase
Mb2965c	3239288	3232953	637	3238652	A	T	TGT->C	AGT->S	non-synonymous	multifunctional mycocerosic acid synthase
Mb2966	3239908	3241650	5	3239912	T	G	ATT->I	AGT->S	non-synonymous	acyl-CoA synthetase
Mb2966	3239908	3241650	158	3240065	G	A	CGG->R	CAG->Q	non-synonymous	acyl-CoA synthetase
Mb2966	3239908	3241650	258	3240165	C	G	GGC->G	GGG->G	synonymous	acyl-CoA synthetase
Mb2966	3239908	3241650	1306	3241213	A	G	ACA->T	GCA->A	non-synonymous	acyl-CoA synthetase
Mb2966	3239908	3241650	1521	3241428	C	T	ATC->I	ATT->I	synonymous	acyl-CoA synthetase
Mb2967	3241643	3244405	1038	3242680	A	C	GTA->V	GTC->V	synonymous	transmembrane transport protein MmpL7
Mb2967	3241643	3244405	1497	3243139	T	C	GCT->A	GCC->A	synonymous	transmembrane transport protein MmpL7
Mb2971c	3254528	3248190	5567	3248962	A	G	GTG->V	GCG->A	non-synonymous	polyketide synthase
Mb2971c	3254528	3248190	5336	3249193	C	A	GGG->G	GTG->V	non-synonymous	polyketide synthase
Mb2971c	3254528	3248190	4703	3249826	T	G	AAG->K	ACG->T	non-synonymous	polyketide synthase
Mb2971c	3254528	3248190	4359	3250170	A	G	GCT->A	GCC->A	synonymous	polyketide synthase
Mb2971c	3254528	3248190	1120	3253409	G	C	CGT->R	GGT->G	non-synonymous	polyketide synthase
Mb2974c	3259032	3257284	1093	3257940	T	C	ACC->T	GCC->A	non-synonymous	acyl-CoA synthetase
Mb2976	3261129	3261941	526	3261654	G	A	GGG->G	AGG->R	non-synonymous	methyltransferase
Mb2979c	3265233	3264268	80	3265154	T	C	CAC->H	CGC->R	non-synonymous	hypothetical protein
Mb2980	3265356	3266087	414	3265769	A	G	GAA->E	GAG->E	synonymous	hypothetical protein
Mb2980	3265356	3266087	710	3266065	C	T	ACC->T	ATC->I	non-synonymous	hypothetical protein
Mb2982c	3268689	3267589	883	3267807	C	G	GAC->D	CAC->H	non-synonymous	glycosyl transferase family protein
Mb2983c	3269527	3268790	111	3269417	T	C	GTA->V	GTG->V	synonymous	methyltransferase
Mb2988	3273218	3274150	427	3273644	A	C	ATG->M	CTG->L	non-synonymous	formyltetrahydrofolate deformylase
Mb2991c	3279735	3276352	2493	3277243	A	G	TCT->S	TCC->S	synonymous	pyruvate carboxylase
Mb2991c	3279735	3276352	1490	3278246	G	A	GCA->A	GTA->V	non-synonymous	pyruvate carboxylase
Mb3003c	3292435	3291851	452	3291984	C	T	GGT->G	GAT->D	non-synonymous	resolvase
Mb3003c	3292435	3291851	235	3292201	C	T	GCG->A	ACG->T	non-synonymous	resolvase
Mb3012c	3302635	3301214	1029	3301607	T	G	GAA->E	GAC->D	non-synonymous	isopropylmalate isomerase large subunit
Mb3014c	3304279	3303419	650	3303630	T	G	GAG->E	GCG->A	non-synonymous	hypothetical protein
Mb3015	3304542	3305033	277	3304818	A	G	ACC->T	GCC->A	non-synonymous	hypothetical protein
Mb3019c	3310084	3309074	550	3309535	G	A	CTC->L	TTC->F	non-synonymous	3-isopropylmalate dehydrogenase
Mb3020c	3311685	3310099	13	3311673	C	T	GTT->V	ATT->I	non-synonymous	D-3-phosphoglycerate dehydrogenase
Mb3021	3311715	3313157	319	3312033	A	T	AGC->S	TGC->C	non-synonymous	dehydrogenase
Mb3021	3311715	3313157	1419	3313133	C	T	CCC->P	CCT->P	synonymous	dehydrogenase
Mb3031	3321324	3322445	148	3321471	C	G	CCC->P	GCC->A	non-synonymous	lipoprotein LppZ
Mb3031	3321324	3322445	656	3321979	A	G	GAC->D	GGC->G	non-synonymous	lipoprotein LppZ
Mb3036c	3328049	3326565	175	3327875	C	T	GTC->V	ATC->I	non-synonymous	aspartyl/glutamyl-tRNA amidotransferase subunit A
Mb3036c	3328049	3326565	70	3327980	T	C	ACC->T	GCC->A	non-synonymous	aspartyl/glutamyl-tRNA amidotransferase subunit A
Mb3036c	3328049	3326565	34	3328016	A	G	TTG->L	CTG->L	synonymous	aspartyl/glutamyl-tRNA amidotransferase subunit A
Mb3040c	3332279	3331266	500	3331780	A	C	TTC->F	TGC->C	non-synonymous	hypothetical protein
Mb3043c	3334867	3333554	982	3333886	C	G	GTG->V	CTG->L	non-synonymous	PPE family protein
Mb3043c	3334867	3333554	158	3334710	G	A	GCG->A	GTG->V	non-synonymous	PPE family protein
Mb3049c	3339182	3337935	510	3338673	C	T	GTG->V	GTA->V	synonymous	transposase
Mb3049c	3339182	3337935	25	3339158	T	C	ACC->T	GCC->A	non-synonymous	transposase
Mb3054c	3344591	3343635	935	3343657	A	G	GTC->V	GCC->A	non-synonymous	electron transfer flavoprotein subunit alpha
Mb3055c	3345430	3344630	189	3345242	C	T	GTG->V	GTA->V	synonymous	electron transfer flavoprotein subunit beta
Mb3062c	3353701	3353018	188	3353514	C	T	CGG->R	CAG->Q	non-synonymous	hypothetical protein
Mb3063c	3354850	3353774	20	3354831	G	T	GCT->A	GAT->D	non-synonymous	hypothetical protein
Mb3068c	3359722	3358493	208	3359515	A	C	TCC->S	GCC->A	non-synonymous	phosphoserine phosphatase
Mb3073c	3364866	3364582	157	3364710	T	C	ACA->T	GCA->A	non-synonymous	hypothetical protein
Mb3075c	3367643	3366069	900	3366744	A	G	CGT->R	CGC->R	synonymous	monooxygenase
Mb3077c	3370726	3368645	1556	3369171	T	C	CAG->Q	CGG->R	non-synonymous	ribonucleotide-diphosphate reductase subunit alpha
Mb3085	3376038	3377516	951	3376988	T	C	TAT->Y	TAC->Y	synonymous	cytochrome P450 136
Mb3090	3383790	3386066	1204	3384993	T	G	TGC->C	GGC->G	non-synonymous	carbon starvation protein A CstA
Mb3090	3383790	3386066	1799	3385588	C	T	CCG->P	CTG->L	non-synonymous	carbon starvation protein A CstA
Mb3102c	3395520	3394597	588	3394933	A	G	ATT->I	ATC->I	synonymous	hypothetical protein
Mb3104	3396088	3397899	635	3396722	T	A	TTC->F	TAC->Y	non-synonymous	hydrolase
Mb3104	3396088	3397899	1002	3397089	G	A	GGG->G	GGA->G	synonymous	hydrolase
Mb3107c	3402535	3399203	1423	3401113	A	G	TTG->L	CTG->L	synonymous	serine/threonine-protein kinase transcriptional regulator
Mb3107c	3402535	3399203	650	3401886	A	G	GTG->V	GCG->A	non-synonymous	serine/threonine-protein kinase transcriptional regulator
Mb3108	3402587	3403825	660	3403246	C	G	TTC->F	TTG->L	non-synonymous	hypothetical protein
Mb3109c	3404973	3403951	964	3404010	A	G	TGC->C	CGC->R	non-synonymous	virulence-regulating transcriptional regulator VirS
Mb3110	3405051	3406538	280	3405330	A	G	ATC->I	GTC->V	non-synonymous	monooxygenase
Mb3114	3409472	3410890	472	3409943	G	A	GCG->A	ACG->T	non-synonymous	hypothetical protein
Mb3119c	3418281	3417361	711	3417571	C	T	ATG->M	ATA->I	non-synonymous	hypothetical protein
Mb3123	3421094	3422233	83	3421176	G	A	GGA->G	GAA->E	non-synonymous	hypothetical protein
Mb3125c	3424209	3423757	348	3423862	C	G	GAG->E	GAC->D	non-synonymous	hypothetical protein
Mb3128c	3427226	3426333	512	3426715	C	T	AGT->S	AAT->N	non-synonymous	cell division protein FtsX
Mb3133	3430555	3431925	421	3430975	A	G	ATA->I	GTA->V	non-synonymous	NADPH:adrenodoxin oxidoreductase FprA
Mb3133	3430555	3431925	1153	3431707	G	A	GAT->D	AAT->N	non-synonymous	NADPH:adrenodoxin oxidoreductase FprA
Mb3135	3433608	3434048	430	3434037	G	A	GTT->V	ATT->I	non-synonymous	hypothetical protein
Mb3136	3434197	3435276	294	3434490	A	G	ACA->T	ACG->T	synonymous	molybdenum cofactor biosynthesis protein A
Mb3136	3434197	3435276	970	3435166	G	A	GCG->A	ACG->T	non-synonymous	molybdenum cofactor biosynthesis protein A
Mb3139	3436248	3436499	99	3436346	A	G	GGA->G	GGG->G	synonymous	molybdenum cofactor biosynthesis protein D
Mb3140	3436621	3437289	33	3436653	C	G	TGC->C	TGG->W	non-synonymous	phosphatase
Mb3140	3436621	3437289	572	3437192	G	T	CGG->R	CTG->L	non-synonymous	phosphatase
Mb3142	3437998	3439245	25	3438022	A	G	ACC->T	GCC->A	non-synonymous	transposase
Mb3142	3437998	3439245	510	3438507	G	A	GTG->V	GTA->V	synonymous	transposase
Mb3144	3440521	3441483	153	3440673	G	A	CTG->L	CTA->L	synonymous	thiosulfate sulfurtransferase
Mb3145	3441861	3442331	468	3442328	T	G	AGT->S	AGG->R	non-synonymous	hypothetical protein
Mb3146	3442341	3442835	119	3442459	A	G	CAA->Q	CGA->R	non-synonymous	hypothetical protein
Mb3148c	3445423	3444248	113	3445311	A	G	GTG->V	GCG->A	non-synonymous	PPE family protein
Mb3150	3445919	3446953	284	3446202	G	T	TGC->C	TTC->F	non-synonymous	hypothetical protein
Mb3152c	3447953	3447372	497	3447457	C	A	GGG->G	GTG->V	non-synonymous	hypothetical protein
Mb3156c	3453037	3451301	1068	3451970	C	T	GAG->E	GAA->E	synonymous	two component sensor histidine kinase DEVS
Mb3156c	3453037	3451301	848	3452190	G	A	ACT->T	ATT->I	non-synonymous	two component sensor histidine kinase DEVS
Mb3156c	3453037	3451301	763	3452275	C	T	GCC->A	ACC->T	non-synonymous	two component sensor histidine kinase DEVS
Mb3158c	3454521	3453715	601	3453921	G	A	CTG->L	TTG->L	synonymous	hypothetical protein
Mb3158c	3454521	3453715	507	3454015	G	C	GCC->A	GCG->A	synonymous	hypothetical protein
Mb3162	3459304	3460392	329	3459632	A	G	AAT->N	AGT->S	non-synonymous	pyruvate formate lyase activating protein PflA
Mb3162	3459304	3460392	770	3460073	C	T	TCC->S	TTC->F	non-synonymous	pyruvate formate lyase activating protein PflA
Mb3162	3459304	3460392	809	3460112	T	C	CTA->L	CCA->P	non-synonymous	pyruvate formate lyase activating protein PflA
Mb3162	3459304	3460392	811	3460114	C	A	CCC->P	ACC->T	non-synonymous	pyruvate formate lyase activating protein PflA
Mb3165	3463204	3464175	876	3464079	A	G	GAA->E	GAG->E	synonymous	NADPH quinone oxidoreductase
Mb3166c	3464655	3464227	399	3464257	C	A	CAG->Q	CAT->H	non-synonymous	hypothetical protein
Mb3170	3467186	3467740	6	3467191	C	A	GGC->G	GGA->G	synonymous	NADH dehydrogenase subunit B
Mb3172	3468447	3469769	387	3468833	T	C	AAT->N	AAC->N	synonymous	NADH dehydrogenase subunit D
Mb3173	3469766	3470524	369	3470134	T	C	GGT->G	GGC->G	synonymous	NADH dehydrogenase subunit E
Mb3175	3471855	3474275	498	3472352	G	C	CTG->L	CTC->L	synonymous	NADH dehydrogenase subunit G
[truncated: 623 more rows]
